1 **The splicing regulator Prp31 prevents retinal degeneration in *Drosophila* by**  
2 **regulating Rhodopsin levels**

3  
4  
5

6 Malte Lehmann\*, Sarita Hebbar\*, Sarah Behrens, Weihua Leng, Michaela Yuan, Sylke  
7 Winkler and Elisabeth Knust<sup>#</sup>

8

9

10 Max-Planck-Institute of Molecular Cell Biology and Genetics,  
11 Pfortenhauerstrasse 108  
12 01307-Dresden, Germany

13

14 \*Equal contribution

15

16 <sup>#</sup>Corresponding author

17 Tel: +49-351-210-1300

18 Fax: +49-351-210-1309

19 e-mail: knust@mpi-cbg.de

20

21 **Running title**

22 *Prp31* and retinal degeneration

23

24 **Keywords:** Retinal degeneration, spliceosome, photoreceptor cells, Rhodopsin, *scarlet*

25

26 **Abstract**

27 Retinitis pigmentosa (RP) is a clinically heterogeneous disease affecting 1.6 million people  
28 worldwide. The second-largest group of genes causing autosomal dominant RP in human  
29 encodes regulators of the splicing machinery, but the molecular consequences that link  
30 defects in splicing factor genes to the aetiology of the disease remain to be elucidated.  
31 Mutations in PRPF31, one of the splicing factors, are linked to RP11. To get insight into the  
32 mechanisms by which mutations in this gene lead to retinal degeneration, we induced  
33 mutations in the *Drosophila* orthologue *Prp31*. Flies heterozygous mutant for *Prp31* are  
34 viable and develop normal eyes and retina. However, photoreceptors degenerate under light  
35 stress, thus resembling the human disease phenotype. *Prp31* mutant flies show a high degree  
36 of phenotypic variability, similar as reported for human RP11 patients. Degeneration is  
37 associated with increased accumulation of rhodopsin 1, both in the rhabdomere and in the cell  
38 body. In fact, reducing rhodopsin levels by raising animals in a carotenoid-free medium not  
39 only suppressed rhodopsin accumulation, but also retinal degeneration. In addition, our results  
40 underscore the relevance of eye color mutations on phenotypic traits, in particular whilst  
41 studying a complex process such as retinal degeneration.

42

43 **Article Summary**

44 Retinitis pigmentosa (RP) is a human disease affecting 1.6 million people worldwide. So far  
45 >50 genes have been identified that are causally related to RP. Mutations in the splicing factor  
46 PRPF31 are linked to RP11. We induced mutations in the *Drosophila* orthologue *Prp31* and  
47 show that flies heterozygous for *Prp31* undergo light-dependent retinal degeneration.  
48 Degeneration is associated with increased accumulation of the light-sensitive molecule,  
49 rhodopsin 1. In fact, reducing rhodopsin levels by dietary intervention suppressed retinal  
50 degeneration. We believe that this model will help to better understand the aetiology of the human  
51 disease.

52

## 53 **Introduction**

54 Retinitis pigmentosa (RP; OMIM 268000) is a clinically heterogeneous set of retinal  
55 dystrophies, which affects about 1.6 million people worldwide. It often starts with night  
56 blindness in early childhood due to the degeneration of rod photoreceptor cells (PRCs),  
57 continues with the loss of the peripheral visual field caused by degeneration of rods (tunnel  
58 vision), and progresses to complete blindness in later life. RP is a genetically heterogeneous  
59 disease and can be inherited as autosomal dominant (adRP), autosomal recessive (arRP) or X-  
60 linked (xLRP) disease. So far >50 genes have been identified that are causally related to non-  
61 syndromic RP (see RetNet: <http://www.sph.uth.tmc.edu/RetNet/disease.htm>). Affected genes  
62 are functionally diverse. Some of them are expressed specifically in PRCs and encode, among  
63 others, transcription factors (e. g. *CRX*, an *otx*-like photoreceptor homeobox gene),  
64 components of the light-induced signalling cascade, including the visual pigment rhodopsin  
65 (Rho/*RHO* in *Drosophila*/human), or genes controlling vitamin A metabolism (e.g. *RLBP-1*,  
66 encoding Retinaldehyde-binding protein). Other genes are associated with the control of  
67 cellular homeostasis, for example *CRB1*, a gene required for the maintenance of polarity  
68 (DAIGER *et al.* 2013; DAIGER *et al.* 2014). Interestingly, the second-largest group of genes  
69 causing adRP, comprising 7 of 23 genes known, encodes regulators of the splicing machinery.  
70 So far, mutations in five PRPF (pre-mRNA processing factor) genes, PRPF31, PRPF4,  
71 PRPF6, PRPF8 and PRPF31, have been linked to adRP, namely RP18, RP70, RP60, RP13  
72 and RP11, respectively. PAPI (Pim1-associated protein) and SNRNP200 (small nuclear  
73 ribonuclearprotein-200), two genes also involved in splicing, have been suggested to be  
74 associated with RP9 and RP33, respectively (MAITA *et al.* 2004; ZHAO *et al.* 2009) [reviewed  
75 in (MORDES *et al.* 2006; POULOS *et al.* 2011; LIU AND ZACK 2013; RUZICKOVA AND STANEK  
76 2016)]. The five *PRPF* genes encode components regulating the assembly of the U4/U6.U5  
77 tri-snRNP, a major module of the pre-mRNA spliceosome machinery (WILL AND LUHRMANN  
78 2011). Several hypotheses have been put forward to explain why mutations in ubiquitously  
79 expressed components of the general splicing machinery show a dominant phenotype only in  
80 PRCs. One hypothesis suggests that PRCs with only half the copy number of a gene encoding  
81 a general splicing component cannot cope with the elevated demand of RNA-/protein  
82 synthesis required to maintain the exceptionally high metabolic rate of PRCs in comparison to  
83 other tissues. Hence, halving their gene dose eventually results in apoptosis. Although this  
84 model is currently favoured, other mechanisms, such as impaired splicing of PRC-specific  
85 mRNAs or toxic effects caused by accumulation of mutant proteins have been discussed and  
86 may contribute to the disease phenotype [discussed in (MORDES *et al.* 2006; TANACKOVIC *et*

87 *al.* 2011; SCOTTI AND SWANSON 2016)].

88 The observation that all adRP-associated genes involved in splicing are highly conserved  
89 from yeast to human allows to use model organisms to unravel the genetic and cell biological  
90 functions of these genes in order to obtain mechanistic insight into the origin of the diseases.  
91 In the case of RP11, the disease caused by mutations in *PRPF31*, three mouse models have  
92 been generated by knock-in and knock-out approaches. Unexpectedly, mice heterozygous  
93 mutant for a null allele or a point mutation that recapitulates a mutation in the corresponding  
94 human gene did not show any sign of retinal degeneration in 12 and 18-month-old mice,  
95 respectively (BUJAKOWSKA *et al.* 2009). Further analyses revealed that the retinal pigment  
96 epithelium, rather than the PRCs, is the primary tissue affected in *Prpf31* heterozygous mice  
97 (GRAZIOTTO *et al.* 2011; FARKAS *et al.* 2014). Morpholino-induced knock-down of zebrafish  
98 *Prpf31* results in strong defects in PRC morphogenesis and survival (LINDER *et al.* 2011).  
99 Defects induced by retina-specific expression of zebrafish *Prpf31* constructs that encode  
100 proteins with the same mutations as those mapped in RP11 patients (called AD5 and SP117,  
101 respectively) were explained to occur by either haplo-insufficiency or by a dominant-negative  
102 effect of the mutant protein (YIN *et al.* 2011). In *Drosophila*, no mutations in the orthologue  
103 *Prp31* have been identified so far. RNAi-mediated knock-down of *Prp31* in the *Drosophila*  
104 eye results in abnormal eye development, ranging from smaller eyes to complete absence of  
105 the eye, including loss of PRCs and pigment cells (RAY *et al.* 2010).

106 We aimed to establish a meaningful *Drosophila* model for RP11-associated retinal  
107 degeneration in order to get better insights into the mechanisms by which *Prp31* prevents  
108 retinal degeneration. Therefore, we isolated two mutant alleles of *Prp31*, *Prp31<sup>P17</sup>* and  
109 *Prp31<sup>P18</sup>*, which carry missense mutations affecting conserved amino acids. Flies  
110 heterozygous for either of these mutations are viable and develop normally. Strikingly, when  
111 exposed to constant light, these mutant flies undergo retinal degeneration, thus mimicking the  
112 disease phenotype of RP11 patients. Degeneration of mutant PRCs is associated with  
113 accumulation and abnormal distribution of the visual pigment rhodopsin, Rh1, in PRCs.  
114 Reduction of dietary vitamin A, a precursor of the chromophore 11-cis-3-hydroxyretinal,  
115 which is bound to opsin to generate the functional visual pigment rhodopsin, prevents  
116 accumulation of rhodopsin and retinal degeneration. From this we conclude that Rh1  
117 accumulation/misdistribution is a major cause of retinal degeneration in *Prp31* heterozygous  
118 flies. We provide additional evidence for the strong influence of the genetic background on  
119 the expressivity of the mutant phenotype, a feature that has also been described for the human

120 disease.

## 121 **Materials and Methods**

122

### 123 **Fly strains and genetics**

124 All phenotypic analyses were performed in age-matched males unless otherwise specified.  
125 Genotypes and genders are summarized in Supplemental Table 1. Flies were maintained at  
126 25°C on standard yeast-cornmeal-agar food. To rule out differences in light sensitivity in the  
127 light-degeneration paradigm, we utilized white-eyed flies, bearing mutations in the *white*  
128 gene, either as general controls or in the mutant background. We tested two *white* alleles ( $w^*$   
129 and  $w^{1118}$ ). Molecular testing of these two alleles by PCR revealed that both  $w^*$  and  $w^{1118}$   
130 carry a deletion of the transcriptional and translation start site of the *white* gene (Fig. S1A).  
131 However, whilst both lines respond to constant light exposure,  $w^{1118}$  exhibits a drastic loss of  
132 photoreceptor cells, in that 75% of all ommatidia are damaged in  $w^{1118}$  eyes following  
133 constant light exposure (Fig. S1B-E). In contrast,  $w^*$  only exhibits modest changes in  
134 morphology, consistent with expected effects of constant light exposure. It has been recently  
135 reported that  $w^{1118}$  is the most severely affected *w* allele in degeneration paradigms as  
136 compared to other alleles of *white* (FERREIRO *et al.* 2018). Furthermore, different strains of  
137  $w^{1118}$  have been reported to exhibit varying phenotypes in terms of adult behaviour (SUN *et al.*  
138 2009). Based on these data, we utilized  $w^*$  as our general control, given its stereotypic  
139 response to constant light. The RNAi line (ID: 35131) for the *Prp31* gene was obtained from  
140 the Vienna *Drosophila* Resource Centre (VDRC, [www.vdrc.at](http://www.vdrc.at)) (DIETZL *et al.* 2007). RNAi  
141 was induced either using *Rh1-Gal4* in combination with Dicer-2 expression, or with a  
142 transgene (*GMR-w<sup>IR</sup>*) (LEE AND CARTHEW 2003) to assay degeneration in a non-pigmented  
143 background. *Df(3L)Exel6262* with deleted segment 71B3;71C1 (PARKS *et al.* 2004),  
144 *Df(3L)ED217* with deleted segment 70F4;71E1 and *Df(3L)ED218* with deleted segment 71B1  
145 - 71E1 (RYDER *et al.* 2007) were obtained from the Bloomington Stock Centre. Since the  
146 deficiency lines carry a mini-*white* transgene due the way they were generated (RYDER *et al.*  
147 2007), *cn bw* was recombined into these lines and all phenotypes were compared with *cn bw*.  
148 *gstD-GFP* (SYKIOTIS AND BOHMANN 2008) (gift from D. Bohman), recombined into *Prp31<sup>18</sup>*,  
149 deficiency lines or genetic controls were used as an indicator of oxidative stress signalling.

### 150 **Isolation of *Prp31* alleles by TILLING**

151 To isolate point mutations in the *Prp31* locus (FlyBase ID: FBgn0036487) a library, of 2.400  
152 fly lines with isogenized third chromosomes, which potentially carry point mutations caused  
153 by EMS treatment, was screened. Our approach targeted exon 1-3 of the *Prp31* locus

154 containing two thirds (67%) of the coding sequence and including several predicted functional  
155 domains (the NOSIC (IPRO012976), the Nop (IPRO002687) and parts of the Prp31\_C  
156 terminal (IPRO019175) domain), making use of two different PCR amplicons. A nested PCR  
157 approach was used, where the inner primers contain universal M13 tails that serve as primer  
158 binding sites of the Sanger sequencing reaction:

- 159 • amplicon1 (covers exon 1 and 2), outer primer, forward: TTCAATGAACCGCATGG,  
160 reverse: GTCGATCTTTGCCTTCTCC, inner / nested primer, forward:  
161 TGTA AACGA CGGCCAGT-AGCAACGGTCACTTCAATTC, reverse:  
162 AGGAAACAGCTATGACCAT-GAAAGGGAATGGGATTCAG);
- 163 • amplicon 2 (covers exon 3), outer primer, forward: ATCGTGGGTGAAATCGAG,  
164 reverse: TGGTCTTCTCATCCACCTG, inner / nested primer, forward:  
165 TGTA AACGA CGGCCAGT-AAGCTGCAGGCTATTCTCAC, reverse:  
166 AGGAAACAGCTATGACCAT-TAGGCATCCTCTTCGATCTG.

167 PCR-reactions were performed in 10 µl volume and with an annealing temperature of 57 °C,  
168 in 384 well format, making use of automated liquid handling tools. PCR fragments were  
169 sequenced by Sanger sequencing optimized for amplicon re-sequencing in a large-scale  
170 format (WINKLER *et al.* 2005; WINKLER *et al.* 2011). Primary hits, resembling sequence  
171 variants, which upon translation result in potential nonsense and missense mutations or affect  
172 a predicted splice site, were verified in independent PCR amplification and Sanger  
173 sequencing reactions. Two of the four lines, named *Prp31<sup>P17</sup>* and *Prp31<sup>P18</sup>*, were recovered  
174 from the living fly library and crossed for three generations to control, white-eyed (*w<sup>\*</sup>*) flies to  
175 reduce the number of accompanying sequence variations. The removal of the markers of the  
176 original, mutagenized chromosome (*ru st e ca*) by the above outcrossing was verified as  
177 follows: the isolated alleles (males) were crossed to the original line (*ru st e ca*) and checked  
178 for the phenotypes associated with homozygous conditions of *roughoid* (*ru*; eye appearance),  
179 *scarlet* (*st*; eye colour), *ebony* (*e*; body colour), *claret* (*ca*; eye color).

## 180 **Experimental light conditions**

181 Flies were reared in regular light conditions defined as 12 hours of light (approx. 900-1300  
182 lux)/12 hours of darkness. For the light-induced degeneration setting, flies (2 days of age)  
183 were placed at 25°C for 7 days in an incubator dedicated for continuous, high intensity light  
184 exposure (JOHNSON *et al.* 2002). High intensity light was defined by intensity of 1200-1300

185 lux measured using an Extech 403125 Light ProbeMeter (Extech Instruments, USA) with the  
186 detector placed immediately adjacent to the vial and facing the nearest light source. To reduce  
187 blue-green light in this setting, a customized box bounded by filters, which block blue-green  
188 light (shown in Fig. 3A) and face the light source in the incubator, was used. Light intensity  
189 was determined by measuring light counts using a USB spectrometer (Ocean Optics, USA).  
190 At the end of 7 days, fly heads were processed for sectioning. For immunostaining and  
191 western blotting, flies (1 day) reared under regular light were processed as described below.

### 192 **Vitamin A depletion**

193 For vitamin A depletion experiments, animals were raised and maintained from embryonic  
194 stages onward on carotenoid free food (10% dry yeast, 10% sucrose, 0.02% cholesterol, and  
195 2% agar) as described (POCHA *et al.* 2011).

### 196 **Transmission electron microscopy**

197 Fixation of adult eyes, semi-thin sections and ultra-thin sections for transmission electron  
198 microscopy was performed as described (MISHRA AND KNUST 2013). 1-2  $\mu\text{m}$  semi-thin  
199 sections were stained with toluidine blue (1% / sodium tetraborate). 70nm ultrathin sections  
200 were imaged using a Morgagni 268 TEM (100kV) electron microscope (FEI Company), and  
201 images were taken using a Side-entry Morada CCD Camera (11 Megapixels, Olympus).

### 202 **Quantification of Degeneration**

203 Toluidine blue stained semi-thin sections were imaged with a 63x Plan Apo oil objective  
204 (N.A. =1.4) on AxioImager.Z1 (Zeiss, Germany), fitted with AxioCamMRm camera, and  
205 analysed using the AxioVision software (Release 4.7). Quantification of degeneration was  
206 performed as described (BULGAKOVA *et al.* 2010). Briefly, the number of detectable  
207 rhabdomeres in each ommatidium was recorded from approximately 60-80 ommatidia per  
208 section and at least three eyes from different individuals were analysed. In case of  
209 degeneration, fewer ommatidia were counted since most of the tissue had degenerated.

### 210 **Immunostaining of adult retina and confocal imaging**

211 Adult eyes were dissected and fixed in 4% formaldehyde. They were then processed either  
212 directly for immunostaining of the whole eye after removal of the lens, or for cryosectioning.  
213 For sectioning, sucrose treatment and embedding of the tissues in Richard-Allan Scientific  
214 NEG-50<sup>TM</sup> (Thermo Fisher Scientific, UK) tissue embedding medium was done (MISHRA AND  
215 KNUST 2013). Eyes were cryosectioned at 12 $\mu\text{m}$  thickness at -21°C. Sections were air-dried  
216 and then subjected to immunostaining, which was done as described previously (SPANNL *et*



217 *al.* 2017). Antibodies used were rabbit anti-GFP (1:500; A-11122; Thermo Fisher Scientific,  
218 UK), mouse anti-Rh 1 (1:50; 4C5) and mouse anti-Na<sup>+</sup>-K<sup>+</sup>-ATPase (1:100; a5), both from  
219 Developmental Studies Hybridoma Bank (DSHB), University of Iowa, USA. 4C5  
220 [<http://dshb.biology.uiowa.edu/4C5>] and a5 [<http://dshb.biology.uiowa.edu/a5>] were  
221 deposited to the DSHB by de Coet, H.G./Tanimura, T., and by Fambrough, D.M.,  
222 respectively. Alexa-Flour conjugated secondary antibodies (1:200, Thermo Fisher Scientific,  
223 UK) were used. DAPI (4',6-Diamidino-2-Phenylindole, Dihydrochloride; Thermo Fisher  
224 Scientific, UK) was used to label nuclei in tissue sections and Alexa-Fluor-555–phalloidin  
225 (Thermo Fisher Scientific, UK) was used to visualise F-actin enriched rhabdomeres. Sections  
226 and whole mounts were imaged with an Olympus Fluoview 1000 confocal microscope using  
227 an Olympus UPlanSApochromat 60x Oil objective (N.A. =1.35). They were subsequently  
228 visualized in Fiji (SCHINDELIN *et al.* 2012) and corrected for brightness and contrast only.

### 229 **Western blotting**

230 Five fly heads from each genotype were homogenized in 10 µL of 4x SDS-PAGE sample  
231 buffer (200 mM Tris-HCl pH 6.8, 20% Glycerol, 8% SDS, 0.04% Bromophenol blue, 400  
232 mM DTT). After dilution with RIPA buffer (150 mM sodium chloride, 1% Triton X-100,  
233 0.5% sodium deoxycholate, 0.1% SDS, 50 mM Tris pH 8), lysates were heated at 37°C for 30  
234 min. Lysates equivalent to 2.5 heads were loaded and run on a 15% acrylamide gel, and the  
235 proteins transferred onto a membrane (Nitrocellulose Blotting Membrane 10600002; GE  
236 Healthcare Life Sciences; PA; US). Primary antibodies were incubated overnight at 4°C and  
237 included anti-Rh1 (4C5; 1:500) and anti-β-Tubulin (E7; 1:5,000), both from Developmental  
238 Studies Hybridoma Bank (DSHB), University of Iowa, USA. 4C5  
239 [<http://dshb.biology.uiowa.edu/4C5>] and E7 [[http://dshb.biology.uiowa.edu/tubulin-beta\\_2](http://dshb.biology.uiowa.edu/tubulin-beta_2)]  
240 were deposited to the DSHB by de Coet, H.G./Tanimura, T., and by M. McCutcheon/ S.  
241 Carroll respectively. As secondary antibody IRDye 800CW goat anti-Mouse IgG (1:15,000;  
242 LI-COR Biotechnology; NE; US) was used for an 1 h incubation. The fluorescent signal from  
243 the dry membrane was measured using a LI-COR Odyssey Sa Infrared Imaging System 9260-  
244 11P (LI-COR Biotechnology). The intensity of the bands was analysed using the Image  
245 Studio Ver 4.0 software. The reported value in Fig. 7 is obtained following normalization of  
246 the intensity values for Rh1 with the corresponding Tubulin intensity values and the number  
247 of heads loaded onto the gel.

### 248 **Figure panel preparation**



249 All figure panels were assembled using Adobe Photoshop CS5.1 and Adobe Illustrator CS3  
250 (Adobe Systems, USA). Statistical analyses and graphs were generated using GraphPad Prism  
251 (GraphPad Software, Inc, USA) and Microsoft Excel. For protein sequence visualization,  
252 Illustrator of Biological Sequences (IBS; (LIU *et al.* 2015)) software package was used.

253

## 254 **Results**

### 255 **Two *Prp31* alleles discovered by TILLING**

256 It was recently shown that RNAi-mediated knockdown of *Drosophila Prp31* in the eye using  
257 eye-specific Gal4-lines (*eyeless* (*ey*)-Gal4 or GMR-Gal4) results in abnormal eye  
258 development, ranging from smaller eyes to complete absence of the eye, including loss of  
259 photoreceptor cells (PRCs) and pigment cells (RAY *et al.* 2010). Since both Gal4 lines are  
260 expressed throughout eye development, some of the defects observed could be the result of  
261 impaired development, for example as a consequence of defective cell fate specification or  
262 eye morphogenesis.

263 We aimed to establish a more meaningful *Drosophila* model for RP11-associated retinal  
264 degeneration, a human disease associated with mutations in the human orthologue *Prpf31*,  
265 which would allow a deeper insight into the role of this splicing factor in the origin and  
266 progression of the disease. Therefore, we set out to isolate specific mutations in *Drosophila*  
267 *Prp31* by TILLING (Targeting Induced Local Lesions IN Genomes), following a protocol  
268 described recently (SPANNL *et al.* 2017). In total, 2,400 genomes of EMS (ethyl  
269 methanesulfonate)-mutagenized flies were screened for sequence variants in two different  
270 amplicons of *Prp31*. Four sequence variants were identified, which were predicted to result in  
271 potentially deleterious missense mutations. Two of the four lines, named *Prp31<sup>P17</sup>* and  
272 *Prp31<sup>P18</sup>*, were recovered from the living fly library and crossed for three generations to  
273 control, white-eyed (*w<sup>\*</sup>*) flies to reduce the number of accompanying sequence variations. We  
274 outcrossed the mutants with white-eyes flies rather than with wild-type, red-eyed flies to  
275 generate a sensitised background for light-dependent degeneration experiments, since  
276 presence of the pigment granules surrounding each ommatidium contributes towards lower  
277 sensitivity to light (STARK AND CARLSON 1984). *Prp31<sup>P18</sup>* was viable as homozygotes and in  
278 trans over any of three deficiencies, which remove, among others, the *Prp31* locus (Fig. 1A).  
279 In contrast, no homozygous *Prp31<sup>P17</sup>* flies were obtained. However, *Prp31<sup>P17</sup>* was viable in  
280 trans over *Prp31<sup>P18</sup>* and over *Df(3L)ED217*. This suggests that the lethality was due to a  
281 second site mutation, which was not removed despite extensive out-crossing. We noticed that  
282 out-crossing *Prp31<sup>P17</sup>* and *Prp31<sup>P18</sup>* did not remove *scarlet* (*st*), one of the markers of the  
283 original, mutagenized chromosome (*ru st e ca*). Therefore, the correct genotypes of the two  
284 mutant lines are *w<sup>\*</sup>; Prp31<sup>P17</sup>, st<sup>1</sup>* and *w<sup>\*</sup>; Prp31<sup>P18</sup>, st<sup>1</sup>*. For simplicity, we will refer to them  
285 as *Prp31<sup>P17</sup>* and *Prp31<sup>P18</sup>* throughout the text.

286 The molecular lesions in the two *Prp31* alleles were mapped in the protein coding region.

287 *Drosophila* PRP31 is a protein of 501 amino acids, which contains a NOSIC domain (named  
288 after the central domain of Nop56/SIK1-like protein), a Nop (**N**ucleolar **p**rotein) domain  
289 required for RNA binding, a PRP31\_C-specific domain and a nuclear localization signal,  
290 NLS. *Prp31*<sup>P17</sup> contained a point mutation that resulted in a non-conservative glutamine to  
291 arginine exchange (G90R) N-terminal to the NOSIC domain. *Prp31*<sup>P18</sup> contained a non-  
292 conservative exchange of a proline to a leucine residue in the Nop domain (P277L) (Fig. 1B).  
293 Both mutations affect amino acids that are conserved between the fly and the human protein  
294 (Suppl. Fig. S2).

295

### 296 **Flies hetero- or hemizygous for *Prp31* undergo light-dependent retinal degeneration**

297 Homo- and heterozygous *Prp31*<sup>P18</sup> and heterozygous *Prp31*<sup>P17</sup> animals raised and kept under  
298 regular light/dark cycles (12h light/12h dark) have eyes of normal size. Histological sections  
299 revealed normal numbers of PRCs per ommatidium (distinguished by the number of  
300 rhabdomeres) and a normal stereotypic arrangement of PRCs (Fig. 1C-F and Suppl. Fig.  
301 S2B). This indicates that the development of the retina was not affected by these mutations.  
302 However, PRCs of *Prp31*<sup>P17/+</sup>, *Prp31*<sup>P18/+</sup> and *Prp31*<sup>P18/Prp31</sup><sup>P18</sup> flies showed clear signs of  
303 retinal degeneration when exposed to constant light for several days, manifested by a  
304 complete or partial loss of rhabdomeric integrity (Fig. 2A-D and Suppl. Fig. S2B'). We used  
305 the number of surviving rhabdomeres as an indicator of the severity of degeneration (Fig. 2E).  
306 When exposed for 7 days to constant light, *w*\* mutant control flies exhibited some retinal  
307 degeneration, with 82% of all ommatidia still displaying the full complement of rhabdomeres.  
308 This phenotype is less severe than that reported for *w*<sup>118</sup> flies (CHEN *et al.* 2017; FERREIRO *et al.*  
309 *et al.* 2018) (Fig. S1). *Prp31* mutant flies showed more severe PRC degeneration, with only  
310 about 48% of ommatidia having the full complement of seven PRCs (Fig. 2E). The degree of  
311 degeneration observed in *Prp31* alleles is less severe and more variable than that observed in  
312 the well-established RP12 disease model induced by mutations in the gene *crumbs* (*crb*)  
313 (JOHNSON *et al.* 2002; CHARTIER *et al.* 2012; SPANNL *et al.* 2017). In the two *crb* alleles  
314 *crb*<sup>11A22</sup> and *crb*<sup>13A9</sup> only 5 to 11% of all ommatidia displayed 7 rhabdomeres upon exposure  
315 to constant light, respectively (Fig. 2E).

316 Surprisingly, while about 18% of all ommatidia in *w*\* mutant control flies had less than seven  
317 rhabdomeres, this number was increased to 50% in the second genetic control, *w*\*;*st*<sup>1</sup>/*+* (Fig.  
318 2E), suggesting that *st*<sup>1</sup> is a dominant enhancer of *w*\*, at least with respect to retinal

319 degeneration. This raised the question whether the degeneration observed in the two *Prp31*  
320 lines used is due to the mutation in *Prp31*, rather than to the mutations in *w* and *st*. To address  
321 this question, we reduced the intensity of blue/green light during light exposure (Fig. 3A),  
322 thereby minimising detrimental effects induced as a result of photolysis of rhodopsin, a  
323 known trigger of apoptosis (STARK AND CARLSON 1984; STARK *et al.* 1985). When exposed to  
324 filtered light with reduced blue/green intensity, neither *w\** nor *w\*;; st<sup>l</sup>/+* ommatidia displayed  
325 any sign of degeneration (Fig. 3B) and almost 100% of ommatidia showed the full  
326 complement of seven rhabdomeres. This is in stark contrast to results obtained under higher  
327 light intensity exposure, under which *w\*;;* and *w\*;;st<sup>l</sup>/+* displayed only 82% and 50% intact  
328 ommatidia, respectively (Fig. 3B). From this we concluded that the damage observed in eyes  
329 lacking pigments (*w\*;;* and *w\*;;st<sup>l</sup>/+*) is caused by high intensity light. This conclusion was  
330 corroborated by virtually no loss of rhabdomeres in wild-type (pigmented) eyes exposed to  
331 light (Suppl. Fig. S3). In contrast, in *Prp31<sup>P18</sup>* heterozygous mutant flies exposed to lower  
332 blue/green light intensities still about 20% of all ommatidia displayed less than seven  
333 rhabdomeres, compared to 52% observed upon high intensity light exposure (Fig. 3B)  
334 Similarly, retinal degeneration is only slightly lowered in *crb* mutants at reduced blue green  
335 light, from 95% defective ommatidia to 80% (Fig. 3B). Another characteristic sign of light-  
336 induced tissue damage in white-eyed flies is the formation of holes or lacunae (FERREIRO *et*  
337 *al.* 2018). In fact, fewer holes were observed upon exposure to lower intensity light in the  
338 tissue (see Suppl. Fig. S3). Taken together, these results suggest i) that in flies lacking  
339 screening pigments high-intensity light induces tissue damage, i. e. PRC degeneration and  
340 formation of lacunae, which can be prevented by filtering-out high-energy wavelengths; and  
341 ii) that light-dependent retinal degeneration in *Prp31* mutants is due to the mutations in  
342 *Prp31*, and that the genetic background (*w\*;;st<sup>l</sup>/+*) only marginally contributes to the degree  
343 of degeneration observed.

344 To further confirm that the degeneration phenotype observed in *Prp31<sup>P18</sup>* and *Prp31<sup>P17</sup>*  
345 heterozygous flies is due to mutations in *Prp31* rather than to a mutation in *st*, we applied  
346 additional strategies to perturb *Prp31*. These included the use of *RNAi*-mediated knockdown  
347 of *Prp31* and of three deficiencies that remove *Prp31* but leave the *st* locus intact (Fig. 1A).  
348 First, we knocked down *Prp31* by overexpressing *Prp31* RNAi, mediated by *Rhl*-Gal4,  
349 which drives expression late in development, from 70% pupal development into adulthood  
350 (KUMAR AND READY 1995). Thereby, we can rule out any effects on PRC specification or  
351 morphogenesis induced by loss of *Prp31*. To remove screening pigments, a second transgene  
352 was introduced into this background, called *GMR-w<sup>IR</sup>*, which expresses *white* RNAi under the

353 control for the GMR-promoter. When exposed to light, the retina of corresponding control  
354 flies showed only minor morphological changes (Fig. 4A). However, the induction of *Prp31*  
355 *RNAi* by *Rhl-Gal4* resulted in clear signs of degeneration upon light exposure, such as loss of  
356 rhabdomeres and accumulation of intensely stained structures reminiscent to apoptotic  
357 features (Fig. 4B). In fact, while 71% of control ommatidia revealed 7 identifiable  
358 rhabdomeres, this number decreased to 48% upon induction of *Prp31 RNAi* (Fig. 4C). As a  
359 second alternative strategy to study the role of *Prp31* in retinal degeneration we analysed the  
360 phenotype of three deficiency lines that cover the *Prp31* locus (see Fig. 1A). Since these  
361 deficiencies carry a *w*<sup>+</sup>-minigene, their retinal phenotype (and that of the respective control)  
362 was studied in a *w*<sup>\*</sup>; *cn bw* mutant background in order to remove all screening pigments.  
363 *Df(3L)Exel6262/+*, *Df(3L)ED217/+*, and *Df(3L)ED218/+* flies exhibited the same degree of  
364 retinal degeneration as *Prp31<sup>P17</sup>* or *Prp31<sup>P18</sup>* heterozygous flies (Fig. 5), with only about 20%  
365 of their ommatidia showing seven rhabdomeres. Similar to the *Prp31* alleles, these deficiency  
366 lines had no obvious effects on retinal development (Suppl. Fig. S4A-D). Degeneration was  
367 also observed in hemizygous *Prp31* flies (*Prp31<sup>P18</sup>/Df(3L)217* and *Prp31<sup>P17</sup>/Df(3L)217*)  
368 (Suppl. Fig. S4E, F).

369 Transmission electron microscopy (TEM) was used to further describe the ultrastructural  
370 features of degenerative phenotypes (Fig. 6). Hallmarks of degeneration include loss of  
371 rhabdomeral integrity, the complete loss of rhabdomeres in some PRCs, and the accumulation  
372 of electron dense aggregates. These features were mostly absent in eyes of *w*<sup>\*</sup> flies and occur  
373 only to some extent in *w*<sup>\*</sup>; *st<sup>1</sup>/+* retina (Fig. 6A, B). In contrast, these attributes of  
374 degeneration were clearly identifiable and more pronounced in the retina of heterozygous and  
375 hemizygous *Prp31* flies (Fig. 6C-E). As mentioned above, degeneration in *crb* mutant eyes  
376 kept under the same conditions was more severe, as revealed from the complete loss of  
377 rhabdomeric integrity in all ommatidia and the accumulation of electron dense aggregates  
378 (Fig. 6F).

379 To summarise, data presented here support the conclusion that loss of one copy of the *Prp31*  
380 locus causes light-induced retinal degeneration.

381

### 382 ***Prp31* mutant photoreceptor cells show increased rhodopsin accumulation**

383 A common cause of retinal degeneration, both in flies and in mammals, is abnormal

384 localization/levels of the visual pigment rhodopsin1 (Rh1) (HOLLINGSWORTH AND GROSS  
385 2012; XIONG AND BELLEN 2013). Therefore, we asked if the degeneration observed in *Prp31*  
386 mutant retinas is associated with altered Rh1 localization/levels. Rh1, encoded by *ninaE*, is  
387 the most abundant rhodopsin expressed in the outer PRCs R1-R6 (OSTROY *et al.* 1974;  
388 HARRIS *et al.* 1976). In control flies raised under regular light conditions (12h light/12h dark),  
389 Rh1 was concentrated in the rhabdomeres. As reported previously, Rh1 either fills the entire  
390 rhabdomere, forms a crescent-shaped pattern, or is restricted to the base or the lateral edges of  
391 the rhabdomere (OREM *et al.* 2006; CHINCHORE *et al.* 2009; MITRA *et al.* 2011; XIONG *et al.*  
392 2012; WANG *et al.* 2014; CHEN *et al.* 2017). Differences in localization have been attributed  
393 to inconsistency in antibody penetration due to the membrane-dense rhabdomeric structure  
394 (XIONG *et al.* 2012). The staining was more consistent when analysed in whole mount  
395 preparations. Here, Rh1 is more uniformly distributed, outlining the rhabdomeric structure  
396 along its length (Fig 7A'). Besides the rhabdomeric localization, Rh1 could be detected in  
397 cytoplasmic punctae (blue arrows in Fig. 7 and Suppl. Fig. S5,). This intracellular pool of Rh1  
398 represents presumably internalized Rh1 following light exposure (SATO AND READY 2005),  
399 since these flies were raised with 12 hours light and 12 hours darkness. PRCs of adult flies  
400 heterozygous for *Prp31* exhibited increased accumulation of Rh1 in the rhabdomeres in  
401 comparison to genetic controls (Fig. 7C, C'). Increased Rh1 immunostaining was observed in  
402 mutants independent of light conditions (Fig. S6).

403 All three deficiencies that remove the *Prp31* locus also exhibited increased Rh1 staining (Fig.  
404 7E, E' and Suppl. Fig. S5C, D) in comparison to the genetic control (Fig. 7D, D'). Finally,  
405 RNAi-mediated knockdown of *Prp31* also resulted in accumulation of Rh1 immunoreactivity  
406 (Fig. 7 F, G). Increased intensity of Rh1 immunostaining is due to increased levels of Rh1 as  
407 revealed by western blots of protein extracts isolated from adult heads (Fig. 7H, I). On  
408 average, Rh1 levels are increased by about four times in *Prp31<sup>P18</sup>* heterozygous tissue as  
409 compared to tissue from genetic controls, *w\*;;st<sup>1</sup>/+*.

410 To determine whether rhodopsin accumulation contributes to light-dependent degeneration in  
411 *Prp31* mutant flies, we experimentally reduced rhodopsin levels by raising animals in  
412 carotenoid-free diet from embryonic stages onward. Carotenoids are precursors of the  
413 chromophore 11-cis-3-hydroxyretinal, which binds to opsin to generate the functional visual  
414 pigment rhodopsin in flies (VON LINTIG *et al.* 2010). In control genotypes, reduction of the  
415 chromophore halts maturation and ER to Golgi transport of rhodopsin, and an intermediate  
416 form accumulates in the perinuclear endoplasmic reticulum (COLLEY *et al.* 1991; OZAKI *et al.*

417 1993). Lack of dietary carotenoids strongly reduced Rh1 levels in the rhabdomere in controls  
418 and *Prp31* mutants and caused Rh1 accumulation in a peri-nuclear location (Fig. 8 A-D’).

419 Raising *Prp31* mutant animals in vitamin A depleted diet also suppressed light-dependent  
420 PRC degeneration. Under this dietary condition, more than 50% of ommatidia displayed 7  
421 rhabdomeres, both in the control (*w\*;;*) and in heterozygous *Prp31* flies (Fig. 8E-I).  
422 Interestingly, this dietary intervention did not suppress the degeneration observed in *w\*;;st/+*  
423 eyes: only 25% ommatidia displayed the full complement of rhabdomeres. In agreement with  
424 previous reports (SATO *et al.* 1998 ) , the retinae of both genetic controls were more  
425 damaged when raised on carotenoid depleted diet as opposed to a standard diet (compare Fig.  
426 2 and Fig. 8).

427 To conclude, these results point to Rh1 accumulation as a major cause of retinal degeneration  
428 in *Prp31* heterozygous flies.

429

430

431 **Mutations in *Prp31*<sup>P18</sup> do not elicit increased oxidative stress signalling in photoreceptor**  
432 **cells**

433 Although PRCs are specialised for light reception to initiate phototransduction, light at the  
434 same time is a stress factor and induces increased production of reactive oxygen species  
435 (ROS) (GERMAN *et al.* 2015). Increased levels of cellular ROS, in turn, induce antioxidant  
436 responses, which include expression of proteins against oxidative stress, e.g. superoxide  
437 dismutase (SOD) or glutathione S-transferase. Their activity can prevent cells from the  
438 detrimental consequences of oxidative stress, such as increased lipid oxidation or damage of  
439 proteins and DNA (TOMANEK 2015). In photoreceptor cells, a failure of the antioxidant  
440 machinery to neutralise increased levels of ROS can lead to light-dependent retinal  
441 degeneration, for example in fly PRCs mutant for *crb* (CHARTIER *et al.* 2012).

442 This raised the question whether flies mutant for *Prp31* are subject to increased oxidative  
443 stress. Therefore, we analysed heterozygous *Prp31*<sup>P18</sup> flies that carried the *gstD-GFP* reporter  
444 transgene. This reporter expresses GFP under the control of upstream regulatory sequences of  
445 *glutathione S-transferase (gstDI)*, one of the genes involved in detoxification, whose  
446 expression is activated by oxidative stress (SYKIOTIS AND BOHMANN 2008). As shown  
447 previously, expression of this reporter correlates with the level of reactive oxygen species  
448 (ROS). This was revealed by comparing its activity with the signal induced upon application



449 of a ROS-sensitive dye, Hydro-Cy3, in the midgut of adult flies stressed by feeding bacteria  
450 (JONES *et al.* 2013). Here, we examined GFP expression in-situ by immunostaining of adult  
451 mutant and control eye tissues, isolated from flies raised in regular light conditions. In control  
452 eyes (*gstD-GFP/+*), GFP expression was high in pigment and cone cells. Interestingly, barely  
453 any *gstD-GFP* expression was detected in PRCs (Fig. 9A). In eyes of *Prp31<sup>P18</sup>/+* flies *gstD-*  
454 *GFP* expression was strongly increased in cone and pigment cells (Fig. 9B). Increased  
455 oxidative stress signalling in the retina of *Prp31<sup>P18</sup>/+* flies was corroborated by using  
456 Dihydroethidium (DHE), a dye to detect ROS directly (OWUSU-ANSAH *et al.* 2008) (Fig. 9D,  
457 E). Strikingly, the eyes of *Df(3L)217/+* flies (lacking one copy of the *Prp31* locus), did not  
458 show any increase in *gstD-GFP* expression nor in DHE staining (Fig. 9G-J), suggesting no  
459 altered ROS levels. Since *Prp31/+* flies are also heterozygous for *st*, we tested ROS levels in  
460 eyes of control flies with only one functional copy of *st*. Surprisingly, enhanced oxidative  
461 stress signalling and mild increase in ROS levels were observed in *w\*;;st<sup>l</sup>/+* as compared to  
462 *w\** (Fig. 9C, F).

463 From these results we conclude that loss of one copy of *Prp31* does not cause detectable  
464 increase in oxidative stress in PRCs, suggesting that increased accumulation of Rh1 in mutant  
465 PRCs is the major cause for retinal degeneration in this mutant.

466

467

## 468 Discussion

469 Here we present a fly model for RP11, an autosomal-dominant human disease leading to  
470 blindness, caused by mutations in the splicing regulator PRPF31. Our results reveal that  
471 mutations in the *Drosophila* orthologue *Prp31* lead to PRC degeneration under light stress,  
472 thus mimicking features of RP11-associated symptoms. Similar as in human, mutations in  
473 *Drosophila Prp31* are haplo-insufficient and lead to retinal degeneration when hetero- or  
474 hemizygous. This is in stark contrast to mice heterozygous for *Prpf31*, which did not show  
475 any signs of PRC degeneration (BUJAKOWSKA *et al.* 2009), but rather late-onset defects in the  
476 retinal pigment epithelium (GRAZIOTTO *et al.* 2011; FARKAS *et al.* 2014).

477 By using three different genetic approaches we provide convincing evidence that the knock-  
478 down of *Prp31* is the cause for the retinal degeneration observed. i) The two *Prp31* alleles  
479 induced by Tilling (*Prp31<sup>P17</sup>* and *Prp31<sup>P18</sup>*) carry missense mutations in conserved amino

480 acids of the coding region. ii) Flies heterozygous for any of three deletions, which remove the  
481 *Prp31* locus, exhibit the same phenotype. iii) RNAi-mediated knock-down of *Prp31* results in  
482 light-induced degeneration. From the results obtained we conclude that the two missense  
483 mutations mapped in *Prp31<sup>P17</sup>* and *Prp31<sup>P18</sup>* are strong hypomorphic alleles. First, the two  
484 *Drosophila* alleles characterized here are hemizygous and homozygous (in the case of  
485 *Prp31<sup>P18</sup>*) viable and fertile. Second, mutations in the two established *Prp31* fly lines are  
486 missense mutations, one located N-terminal to the NOSIC domain in *Prp31<sup>P17</sup>* (G90R) and  
487 the other in the Nop domain in *Prp31<sup>P18</sup>* (P277L) (see Fig. 1A), which most likely result in a  
488 reduced function of the respective protein. Whether protein levels are also decreased cannot  
489 be answered due to the lack of specific antibodies. In yeast, Prp31 is a component of the  
490 spliceosomal U4/U6 di-SNP, which contains, beside the base-paired U4 and U6 snRNAs,  
491 more than 10 other proteins, including Prp3 and Prp4. In this complex, Prp31 is required to  
492 stabilize a U4/U6 snRNA junction, which in turn is required for binding of Prp3/4 (HARDIN *et*  
493 *al.* 2015). The Nop domain in human PRPF31 is involved in an essential step in the formation  
494 of the U4/U6-U5 tri-snRNP by building a complex of the U4 snRNA and a 15.5K protein.  
495 Consistent with this, many point mutations in human PRPF31, which are linked to RP11,  
496 have been mapped to the Nop domain. Mutations in amino acid H270 in the Nop domain of  
497 human PRPF31, for example, result in its reduced affinity to the complex formed by a stem-  
498 loop structure of the U4 snRNA and the 15.5K protein (SCHULTZ *et al.* 2006; LIU *et al.* 2007).  
499 Interestingly, the mutated amino acid residue in *Drosophila Prp31<sup>P18</sup>* (P277L) lies next to a  
500 histidine (H278), which corresponds to amino acid H270 in the human protein (see Suppl.  
501 Fig. S1). Therefore, it is tempting to speculate that the *Drosophila* P277L mutation could  
502 similarly weaken, but not abolish the corresponding interaction of the mutant Prp31 protein  
503 with the U4/U6 complex. Further experiments are required to determine the functional  
504 consequences of the molecular lesions.

505 We noticed that the retinal phenotype observed upon reduction of *Prp31* is more variable than  
506 that observed upon loss of *crb* (see, for example, Fig. 2E) (JOHNSON *et al.* 2002; SPANNL *et al.*  
507 2017). This could be due to the fact that all *Prp31* conditions analyzed represent hypomorphic  
508 conditions with some residual function of the protein maintained. However, the expressivity  
509 of the mutant phenotype is not increased in *Prp31* hemizygous flies in comparison to that of  
510 *Prp31* heterozygous flies. This rather argues that the genetic background plays an important  
511 role. Background effects are often the result of the activity of so-called “modifier genes”,  
512 which modify the degree of the mutant phenotype due to their effects on the activity of the  
513 gene under discussion. This can be due either to a direct effect of the modifier on the

514 functionality of the mutant allele (or the respective wild-type allele in a heterozygous  
515 condition), or to an indirect effect, e.g. as a result of a variation in a gene that acts in the same  
516 pathway as the gene under investigation. The availability of the so-called *Drosophila*  
517 *melanogaster* Genetic Reference Panel (DGRP) lines now allows to systematically screen for  
518 modifiers of a given mutation in about 200 inbred lines (HUANG *et al.* 2014)[reviewed in  
519 (MACKAY AND HUANG 2018)]. Using this library, modifiers of the locomotor defect in flies  
520 mutant for LRRK2 (leucine-rich kinase 2), a model for Parkinson's disease, and for a Retinitis  
521 pigmentosa model based on defective rhodopsin (CHOW *et al.* 2016; LAVOY *et al.* 2018), have  
522 been identified. Some of the candidates that affect the expressivity of the mutation studied are  
523 likely candidates to act in the same functional pathway as the respective disease gene.  
524 Interestingly, humans carrying the same molecular lesion in the *Prpf31* gene show an  
525 unusually high degree of phenotypic non-penetrance and can even be asymptomatic. Various  
526 causes have been uncovered to explain this feature, including a highly variable expression  
527 level of the wild-type *Prpf31* allele and changes in expression levels of trans-acting regulators  
528 (RIO FRIO *et al.* 2008) [reviewed in (ROSE AND BHATTACHARYA 2016)].

529 PRCs of flies lacking one functional copy of *Prpf31* showed increased levels of Rh1 both in  
530 the rhabdomeres and in cytoplasmic punctae, as revealed by immunostaining and western blot  
531 analysis. Increased rhabdomeric Rh1, which, to our knowledge, has not been described for  
532 any other mutant, did not affect rhabdomere size or structure. This is different from  
533 observations in the mouse retina, in which transgenic overexpression of wild-type bovine or  
534 human rhodopsin induced an increase in outer segment volume of rod PRCs (WEN *et al.*  
535 2009; PRICE *et al.* 2012). Increased Rh1 levels were also correlated to enhanced degeneration  
536 in *highroad* mutants. When analyzed in the presence of the folding-defective Rh1 allele,  
537 *ninaE*<sup>G69D</sup> to sensitize the background, PRC degeneration of *highroad* mutants was  
538 accelerated (HUANG *et al.* 2018). Here, it has been hypothesized that *highroad*, encoding a  
539 carboxypeptidase, is required for Rh1 degradation. In several other *Drosophila* mutants,  
540 accumulation of Rh1 in endocytic compartments has been suggested to cause retinal  
541 degeneration due to its toxicity. For example, dominant mutations in *Drosophila ninaE* result  
542 in ER accumulation of misfolded Rh1 due to impaired protein maturation. This, in turn,  
543 causes an overproduction of ER cisternae and induces the unfolded protein response (UPR),  
544 which eventually leads to apoptosis of PRCs, both in flies and in mammals (COLLEY *et al.*  
545 1995; ZHANG *et al.* 2014; KROEGER *et al.* 2018). In the absence of carotenoids, rhodopsin  
546 maturation is impaired and opsin accumulates in perinuclear ER (COLLEY *et al.* 1991; OZAKI  
547 *et al.* 1993; SATOH *et al.* 1997).

548 Alternatively, as suggested for mutants in *norpA*, *arr2*, *rdgB* and *rdgC*, retinal degeneration  
549 can be induced by an abnormally stable, light-induced metarhodopsin-arrestin complex,  
550 which accumulates in the cytoplasm after endocytosis and is toxic (ALLOWAY *et al.* 2000;  
551 KISELEV *et al.* 2000). Interestingly, mis-localisation of rhodopsin in human PRCs to sites  
552 other than the outer segment is a common characteristic of various forms of RP and is  
553 considered to contribute to the pathological severity (HOLLINGSWORTH AND GROSS 2012).  
554 Our data suggest that increased accumulation of rhodopsin causes degeneration in *Prp31*  
555 mutant retinas, since reduction of Rh1 by depletion of dietary carotenoid obliterated increased  
556 Rh1 immunoreactivity in *Prp31* mutant, caused opsin retention in perinuclear compartments  
557 and suppressed PRC degeneration. Currently, we cannot distinguish whether Rh1  
558 accumulation in the rhabdomere or in the cytoplasm is responsible for light-dependent PRC  
559 degeneration. Our data further suggest that *Prp31* regulates, directly or indirectly, Rh1 levels  
560 at a posttranscriptional level, since no increase at the RNA level was detected in  
561 transcriptome analyses (own unpublished data). This is different from results obtained in  
562 primary retinal cell cultures, where expression of a mutant *Prpf31* gene reduced rhodopsin  
563 expression as a result of impaired splicing of the rhodopsin pre-mRNA (YUAN *et al.* 2005). It  
564 may be appealing to explore whether upregulation of Rh1 in *Drosophila Prp31* mutants is due  
565 to effects on the opsin protein, e. g. its stability, and/or the formation/stability of the  
566 chromophore. Additional defects could contribute to the mutant phenotype, such as impaired  
567 overall transcription or splicing defects, as described for *Prpf31* zebrafish models (LINDER *et*  
568 *al.* 2011; YIN *et al.* 2011).

569 In several cases increased oxidative stress contributes to PRC degeneration, e. g. in PRCs  
570 mutant for *crb* (CHARTIER *et al.* 2012) or for *SdhA*, which encodes the succinate  
571 dehydrogenase flavoprotein subunit of mitochondrial complex II (MAST *et al.* 2008).  
572 Surprisingly, increase in ROS levels and ROS responses in the retina of  $w^*$ ; *Prp31<sup>P18</sup> st<sup>1</sup> /+*  
573 flies could be traced back to the mutation in *st*, since the control  $w^*$ ; *st<sup>1</sup> /+* showed higher  
574 levels of ROS as compared with  $w^*$ , which correlates with enhanced retinal damage (Fig. 2,  
575 Suppl. Fig. S3). This defines *st<sup>1</sup>* as a dominant enhancer of  $w^*$ , at least with respect to retinal  
576 degeneration. We would like to stress that all our analysis have been performed with  $w^*$ ,  
577 rather than with  $w^{1118}$ , which is often used in comparable studies. Both alleles carry a big  
578 deletion, which includes the transcriptional and translational start site (Suppl. Fig. S1 and  
579 Suppl. Table 2). However, since retinal degeneration of  $w^{1118}$  flies was much stronger under  
580 the light regime used here, all experiments and controls used the  $w^*$  allele.

581 The enhancement of the *w* phenotype by *st*<sup>1</sup> seems surprising since both genotypes have  
582 unpigmented eyes. *w* and *st* encode members of the ATP binding cassette (ABC) transporters,  
583 and the White-Scarlet dimer is required for the transport of tryptophan, the precursor of  
584 xanthommatins (the brown pigments) into the granules of the eye's pigment cells (NOLTE  
585 1950; SULLIVAN AND SULLIVAN 1975; TEARLE *et al.* 1989; EWART AND HOWELLS 1998;  
586 MACKENZIE *et al.* 1999; MACKENZIE *et al.* 2000). In addition, *w* and *st* mutant flies have  
587 reduced numbers of capitate projections (BORYCZ *et al.* 2008), important specializations at the  
588 synapse of PRCs. Capitate projections are formed by finger-like invaginations of epithelial  
589 glia cells into the terminals of R1-R6 (STARK AND CARLSON 1986) and are sites of vesicle  
590 endocytosis and neurotransmitter recycling (MELZIG *et al.* 1998; FABIAN-FINE *et al.* 2003;  
591 RAHMAN *et al.* 2012). Reduced number of capitate projections were linked to retinal  
592 degeneration of *Drosophila* carrying mutations in *lin-7*, *cask* or *dlgS97*. Proteins encoded by  
593 these genes form a protein complex required in the postsynaptic lamina neurons to prevent  
594 retinal degeneration (SOUKUP *et al.* 2013). Whether *st*<sup>1</sup> also enhances the defects at the  
595 synapse of *w* remains to be elucidated. These results highlight the importance of carefully  
596 controlling the genetic background when studying retinal degeneration, including the choice  
597 of a specific allele.

598

599

600

601

602

## 603 **Acknowledgement**

604

605 We would like to thank D. Bohmann for generously providing the *gstD-GFP* fly lines, the  
606 Bloomington Stock Centre for fly stocks, and the Developmental Studies Hybridoma Bank  
607 (DSHB) for antibodies. This work was supported by the fly facility, the light and electron  
608 microscopy facility and the sequencing facility of MPI-CBG. We thank K. Kapp (Univ. of  
609 Kassel, Germany) for technical advice on western blotting procedures, and K. Subramanian  
610 (MPI-CBG, Germany) for help with the spectrometer. This work was funded by the Max-  
611 Planck Society.

612

613

614



616 **Bibliography**

617

618 Alloway, P. G., L. Howard and P. J. Dolph, 2000 The formation of stable rhodopsin-arrestin  
619 complexes induces apoptosis and photoreceptor cell degeneration. *Neuron* 28: 129-  
620 138.

621 Borycz, J., J. A. Borycz, A. Kubow, V. Lloyd and I. A. Meinertzhagen, 2008 *Drosophila*  
622 ABC transporter mutants *white*, *brown* and *scarlet* have altered contents and  
623 distribution of biogenic amines in the brain. *J Exp Biol* 211: 3454-3466.

624 Bujakowska, K., C. Maubaret, C. F. Chakarova, N. Tanimoto, S. C. Beck *et al.*, 2009 Study of  
625 gene-targeted mouse models of splicing factor gene Prpf31 implicated in human  
626 autosomal dominant retinitis pigmentosa (RP). *Invest Ophthalmol Vis Sci* 50: 5927-  
627 5933.

628 Bulgakova, N. A., M. Rentsch and E. Knust, 2010 Antagonistic functions of two Stardust  
629 isoforms in *Drosophila* photoreceptor cells. *Mol Biol Cell* 21: 3915-3925.

630 Chartier, F. J.-M., E. J.-L. Hardy and P. Laprise, 2012 Crumbs limits oxidase-dependent  
631 signaling to maintain epithelial integrity and prevent photoreceptor cell death. *J Cell*  
632 *Biol* 198: 991-998.

633 Chen, X., H. Hall, J. P. Simpson, W. D. Leon-Salas, D. F. Ready *et al.*, 2017 Cytochrome b5  
634 protects photoreceptors from light stress-induced lipid peroxidation and retinal  
635 degeneration. *NPJ Aging Mech Dis* 3: 18.

636 Chinchore, Y., A. Mitra and P. J. Dolph, 2009 Accumulation of rhodopsin in late endosomes  
637 triggers photoreceptor cell degeneration. *PLoS Genet* 5: e1000377.

638 Chow, C. Y., K. J. Kelsey, M. F. Wolfner and A. G. Clark, 2016 Candidate genetic modifiers  
639 of retinitis pigmentosa identified by exploiting natural variation in *Drosophila*. *Hum*  
640 *Mol Genet* 25: 651-659.

641 Colley, N. J., E. K. Baker, M. A. Stamnes and C. S. Zuker, 1991 The cyclophilin homolog  
642 *ninaA* is required in the secretory pathway. *Cell* 67: 255-263.

643 Colley, N. J., J. A. Cassill, E. K. Baker and C. S. Zuker, 1995 Defective intracellular transport  
644 is the molecular basis of rhodopsin-dependent dominant retinal degeneration. *Proc*  
645 *Natl Acad Sci U S A* 92: 3070-3074.

646 Daiger, S. P., S. J. Bowne and L. S. Sullivan, 2014 Genes and Mutations Causing Autosomal  
647 Dominant Retinitis Pigmentosa. *Cold Spring Harb Perspect Med* 5.

648 Daiger, S. P., L. S. Sullivan and S. J. Bowne, 2013 Genes and mutations causing retinitis  
649 pigmentosa. *Clin Genet* 84: 132-141.

650 Dietzl, G., D. Chen, F. Schnorrer, K. C. Su, Y. Barinova *et al.*, 2007 A genome-wide  
651 transgenic RNAi library for conditional gene inactivation in *Drosophila*. *Nature* 448:  
652 151-156.

653 Ewart, G. D., and A. J. Howells, 1998 ABC transporters involved in transport of eye pigment  
654 precursors in *Drosophila melanogaster*. *Methods Enzymol* 292: 213-224.

655 Fabian-Fine, R., P. Verstreken, P. R. Hiesinger, J. A. Horne, R. Kostyleva *et al.*, 2003  
656 Endophilin promotes a late step in endocytosis at glial invaginations in *Drosophila*  
657 photoreceptor terminals. *J Neurosci* 23: 10732-10744.

658 Farkas, M. H., D. S. Lew, M. E. Sousa, K. Bujakowska, J. Chatagnon *et al.*, 2014 Mutations  
659 in pre-mRNA processing factors 3, 8, and 31 cause dysfunction of the retinal pigment  
660 epithelium. *Am J Pathol* 184: 2641-2652.

661 Ferreira, M. J., C. Perez, M. Marchesano, S. Ruiz, A. Caputi *et al.*, 2018 *Drosophila*  
662 *melanogaster* *White* Mutant *w(1118)* Undergo Retinal Degeneration. *Front Neurosci*  
663 11: 732.

664 German, O. L., D. L. Agnolazza, L. E. Politi and N. P. Rotstein, 2015 Light, lipids and  
665 photoreceptor survival: live or let die? *Photochem Photobiol Sci* 14: 1737-1753.



- 666 Graziotto, J. J., M. H. Farkas, K. Bujakowska, B. M. Deramaudt, Q. Zhang *et al.*, 2011 Three  
667 gene-targeted mouse models of RNA splicing factor RP show late-onset RPE and  
668 retinal degeneration. *Invest Ophthalmol Vis Sci* 52: 190-198.
- 669 Hardin, J. W., C. Warnasooriya, Y. Kondo, K. Nagai and D. Rueda, 2015 Assembly and  
670 dynamics of the U4/U6 di-snRNP by single-molecule FRET. *Nucleic Acids Res* 43:  
671 10963-10974.
- 672 Harris, W. A., W. S. Stark and J. A. Walker, 1976 Genetic dissection of the photoreceptor  
673 system in the compound eye of *Drosophila melanogaster*. *J. Physiol.* 256: 415-439.
- 674 Hollingsworth, T. J., and A. K. Gross, 2012 Defective trafficking of rhodopsin and its role in  
675 retinal degenerations. *Int Rev Cell Mol Biol* 293: 1-44.
- 676 Huang, H. W., B. Brown, J. Chung, P. M. Domingos and H. D. Ryoo, 2018 highroad Is a  
677 Carboxypeptidase Induced by Retinoids to Clear Mutant Rhodopsin-1 in *Drosophila*  
678 Retinitis Pigmentosa Models. *Cell Rep* 22: 1384-1391.
- 679 Huang, W., A. Massouras, Y. Inoue, J. Peiffer, M. Ramia *et al.*, 2014 Natural variation in  
680 genome architecture among 205 *Drosophila melanogaster* Genetic Reference Panel  
681 lines. *Genome Res* 24: 1193-1208.
- 682 Johnson, K., F. Grawe, N. Grzeschik and E. Knust, 2002 *Drosophila* Crumbs is required to  
683 inhibit light-induced photoreceptor degeneration. *Curr Biol* 12: 1675-1680.
- 684 Jones, R. M., L. Luo, C. S. Ardita, A. N. Richardson, Y. M. Kwon *et al.*, 2013 Symbiotic  
685 lactobacilli stimulate gut epithelial proliferation via Nox-mediated generation of  
686 reactive oxygen species. *EMBO J* 32: 3017-3028.
- 687 Kiselev, A., M. Socolich, J. Vinós, R. W. Hardy, C. S. Zuker *et al.*, 2000 A molecular  
688 pathway for light-dependent photoreceptor apoptosis in *Drosophila*. *Neuron* 28: 139-  
689 152.
- 690 Kroeger, H., W. C. Chiang, J. Felden, A. Nguyen and J. H. Lin, 2018 ER stress and unfolded  
691 protein response in ocular health and disease. *FEBS J.*
- 692 Kumar, J. P., and D. F. Ready, 1995 Rhodopsin plays an essential structural role in  
693 *Drosophila* photoreceptor development. *Development* 121: 4359-4370.
- 694 Lavoy, S., V. G. Chittoor-Vinod, C. Y. Chow and I. Martin, 2018 Genetic Modifiers of  
695 Neurodegeneration in a *Drosophila* Model of Parkinson's Disease. *Genetics.*
- 696 Lee, Y. S., and R. W. Carthew, 2003 Making a better RNAi vector for *Drosophila*: use of  
697 intron spacers. *Methods* 30: 322-329.
- 698 Linder, B., H. Dill, A. Hirmer, J. Brocher, G. P. Lee *et al.*, 2011 Systemic splicing factor  
699 deficiency causes tissue-specific defects: a zebrafish model for retinitis pigmentosa.  
700 *Hum Mol Genet* 20: 368-377.
- 701 Liu, M. M., and D. J. Zack, 2013 Alternative splicing and retinal degeneration. *Clin Genet* 84:  
702 142-149.
- 703 Liu, S., P. Li, O. Dybkov, S. Nottrott, K. Hartmuth *et al.*, 2007 Binding of the human Prp31  
704 Nop domain to a composite RNA-protein platform in U4 snRNP. *Science* 316: 115-  
705 120.
- 706 Liu, W., Y. Xie, J. Ma, X. Luo, P. Nie *et al.*, 2015 IBS: an illustrator for the presentation and  
707 visualization of biological sequences. *Bioinformatics* 31: 3359-3361.
- 708 Mackay, T. F. C., and W. Huang, 2018 Charting the genotype-phenotype map: lessons from  
709 the *Drosophila melanogaster* Genetic Reference Panel. *Wiley Interdiscip Rev Dev*  
710 *Biol* 7.
- 711 Mackenzie, S. M., M. R. Brooker, T. R. Gill, G. B. Cox, A. J. Howells *et al.*, 1999 Mutations  
712 in the *white* gene of *Drosophila melanogaster* affecting ABC transporters that  
713 determine eye colouration. *Biochim Biophys Acta* 1419: 173-185.
- 714 Mackenzie, S. M., A. J. Howells, G. B. Cox and G. D. Ewart, 2000 Sub-cellular localisation  
715 of the white/scarlet ABC transporter to pigment granule membranes within the  
716 compound eye of *Drosophila melanogaster*. *Genetica* 108: 239-252.

- 717 Maita, H., H. Kitaura, T. J. Keen, C. F. Inglehearn, H. Ariga *et al.*, 2004 PAP-1, the mutated  
718 gene underlying the RP9 form of dominant retinitis pigmentosa, is a splicing factor.  
719 *Exp Cell Res* 300: 283-296.
- 720 Mast, J. D., K. M. Tomalty, H. Vogel and T. R. Clandinin, 2008 Reactive oxygen species act  
721 remotely to cause synapse loss in a *Drosophila* model of developmental mitochondrial  
722 encephalopathy. *Development* 135: 2669-2679.
- 723 Melzig, J., M. Burg, M. Gruhn, W. L. Pak and E. Buchner, 1998 Selective histamine uptake  
724 rescues photo- and mechanoreceptor function of histidine decarboxylase-deficient  
725 *Drosophila* mutant. *J Neurosci* 18: 7160-7166.
- 726 Mishra, M., and E. Knust, 2013 Analysis of the *Drosophila* compound eye with light and  
727 electron microscopy. *Methods Mol Biol* 935: 161-182.
- 728 Mitra, A., Y. Chinchore, R. Kinser and P. J. Dolph, 2011 Characterization of two dominant  
729 alleles of the major rhodopsin-encoding gene *ninaE* in *Drosophila*. *Mol Vis* 17: 3224-  
730 3233.
- 731 Mordes, D., X. Luo, A. Kar, D. Kuo, L. Xu *et al.*, 2006 Pre-mRNA splicing and retinitis  
732 pigmentosa. *Mol Vis* 12: 1259-1271.
- 733 Nolte, D. J., 1950 The eye-pigmentary system of *Drosophila*: the pigment cells. *J Genet* 50:  
734 79-99.
- 735 Orem, N. R., X. L. and P. J. Dolph, 2006 An essential role for endocytosis of rhodopsin  
736 through interaction of visual arrestin with the AP-2 adaptor. *J Cell Sci* 119: 3141-  
737 3148.
- 738 Ostroy, S. E., M. Wilson and W. L. Pak, 1974 *Drosophila* rhodopsin: photochemistry,  
739 extraction and differences in the norp AP12 phototransduction mutant. *Biochem*  
740 *Biophys Res Commun* 59: 960-966.
- 741 Owusu-Ansah, E., A. Yavari, S. Mandal and U. Banerjee, 2008 Distinct mitochondrial  
742 retrograde signals control the G1-S cell cycle checkpoint. *Nat Genet* 40: 356-361.
- 743 Ozaki, K., H. Nagatani, M. Ozaki and F. Tokunaga, 1993 Maturation of major *Drosophila*  
744 rhodopsin, *ninaE*, requires chromophore 3-hydroxyretinal. *Neuron* 10: 1113-1119.
- 745 Parks, A. L., K. R. Cook, M. Belvin, N. A. Dompe, R. Fawcett *et al.*, 2004 Systematic  
746 generation of high-resolution deletion coverage of the *Drosophila melanogaster*  
747 genome. *Nat Genet* 36: 288-292.
- 748 Pocha, S. M., A. Shevchenko and E. Knust, 2011 Crumbs regulates rhodopsin transport by  
749 interacting with and stabilizing myosin V. *J Cell Biol* 195: 827-838.
- 750 Poulos, M. G., R. Batra, K. Charizanis and M. S. Swanson, 2011 Developments in RNA  
751 splicing and disease. *Cold Spring Harb Perspect Biol* 3: a000778.
- 752 Price, B. A., I. M. Sandoval, F. Chan, R. Nichols, R. Roman-Sanchez *et al.*, 2012 Rhodopsin  
753 gene expression determines rod outer segment size and rod cell resistance to a  
754 dominant-negative neurodegeneration mutant. *PLoS One* 7: e49889.
- 755 Rahman, M., H. Ham, X. Liu, Y. Sugiura, K. Orth *et al.*, 2012 Visual neurotransmission in  
756 *Drosophila* requires expression of Fic in glial capitate projections. *Nat Neurosci* 15:  
757 871-875.
- 758 Ray, P., X. Luo, E. J. Rao, A. Basha, E. A. Woodruff, 3rd *et al.*, 2010 The splicing factor  
759 Prp31 is essential for photoreceptor development in *Drosophila*. *Protein Cell* 1: 267-  
760 274.
- 761 Rio Frio, T., N. Civic, A. Ransijn, J. S. Beckmann and C. Rivolta, 2008 Two trans-acting  
762 eQTLs modulate the penetrance of PRPF31 mutations. *Hum Mol Genet* 17: 3154-  
763 3165.
- 764 Rose, A. M., and S. S. Bhattacharya, 2016 Variant haploinsufficiency and phenotypic non-  
765 penetrance in PRPF31-associated retinitis pigmentosa. *Clin Genet* 90: 118-126.
- 766 Ruzickova, S., and D. Stanek, 2016 Mutations in spliceosomal proteins and retina  
767 degeneration. *RNA Biol*: 1-9.

- 768 Ryder, E., M. Ashburner, R. Bautista-Llacer, J. Drummond, J. Webster *et al.*, 2007 The  
769 DrosDel deletion collection: a *Drosophila* genomewide chromosomal deficiency  
770 resource. *Genetics* 177: 615-629.
- 771 Satoh, A., F. Tokunaga, S. Kawamura and K. Ozaki, 1997 In situ inhibition of vesicle  
772 transport and protein processing in the dominant negative Rab1 mutant of *Drosophila*.  
773 *J Cell Sci* 110 ( Pt 23): 2943-2953.
- 774 Satoh, A. K., H. Nagatani, F. Tokunaga, S. Kawamura and K. Ozaki, 1998 Rhodopsin  
775 Transport and Rab Expression in the Carotenoid-Deprived *Drosophila melanogaster*.  
776 *Zoological Science* 15: 651-659.
- 777 Satoh, A. K., and D. F. Ready, 2005 Arrestin1 mediates light-dependent rhodopsin  
778 endocytosis and cell survival. *Curr Biol* 15: 1722-1733.
- 779 Schindelin, J., I. Arganda-Carreras, E. Frise, V. Kaynig, M. Longair *et al.*, 2012 Fiji: an open-  
780 source platform for biological-image analysis. *Nat Methods* 9: 676-682.
- 781 Schultz, A., S. Nottrott, K. Hartmuth and R. Luhrmann, 2006 RNA structural requirements  
782 for the association of the spliceosomal hPrp31 protein with the U4 and U4atac small  
783 nuclear ribonucleoproteins. *J Biol Chem* 281: 28278-28286.
- 784 Scotti, M. M., and M. S. Swanson, 2016 RNA mis-splicing in disease. *Nat Rev Genet* 17: 19-  
785 32.
- 786 Soukup, S. F., S. M. Pocha, M. Yuan and E. Knust, 2013 DLin-7 is required in postsynaptic  
787 lamina neurons to prevent light-induced photoreceptor degeneration in *Drosophila*.  
788 *Curr Biol* 23: 1349-1354.
- 789 Spann, S., A. Kumichel, S. Hebbbar, K. Kapp, M. Gonzalez-Gaitan *et al.*, 2017 The  
790 Crumbs\_C isoform of *Drosophila* shows tissue- and stage-specific expression and  
791 prevents light-dependent retinal degeneration. *Biol Open* 6: 165-175.
- 792 Stark, W. S., and S. D. Carlson, 1984 Blue and ultraviolet light induced damage to the  
793 *Drosophila* retina: ultrastructure. *Curr Eye Res* 3: 1441-1454.
- 794 Stark, W. S., and S. D. Carlson, 1986 Ultrastructure of capitate projections in the optic  
795 neuropil of Diptera. *Cell Tissue Res* 246: 481-486.
- 796 Stark, W. S., K. D. Walker and J. M. Eidel, 1985 Ultraviolet and blue light induced damage to  
797 the *Drosophila* retina: microspectrophotometry and electrophysiology. *Curr Eye Res*  
798 4: 1059-1075.
- 799 Sullivan, D. T., and M. C. Sullivan, 1975 Transport defects as the physiological basis for eye  
800 color mutants of *Drosophila melanogaster*. *Biochem Genet* 13: 603-613.
- 801 Sun, Y., L. Liu, Y. Ben-Shahar, J. S. Jacobs, D. F. Eberl *et al.*, 2009 TRPA channels  
802 distinguish gravity sensing from hearing in Johnston's organ. *Proc Natl Acad Sci U S*  
803 *A* 106: 13606-13611.
- 804 Sykiotis, G. P., and D. Bohmann, 2008 Keap1/Nrf2 signaling regulates oxidative stress  
805 tolerance and lifespan in *Drosophila*. *Dev Cell* 14: 76-85.
- 806 Tanackovic, G., A. Ransijn, P. Thibault, S. Abou Elela, R. Klinck *et al.*, 2011 PRPF  
807 mutations are associated with generalized defects in spliceosome formation and pre-  
808 mRNA splicing in patients with retinitis pigmentosa. *Hum Mol Genet* 20: 2116-2130.
- 809 Tearle, R. G., J. M. Belote, M. McKeown, B. S. Baker and A. J. Howells, 1989 Cloning and  
810 characterization of the scarlet gene of *Drosophila melanogaster*. *Genetics* 122: 595-  
811 606.
- 812 Tomanek, L., 2015 Proteomic responses to environmentally induced oxidative stress. *J Exp*  
813 *Biol* 218: 1867-1879.
- 814 von Lintig, J., P. D. Kiser, M. Golczak and K. Palczewski, 2010 The biochemical and  
815 structural basis for trans-to-cis isomerization of retinoids in the chemistry of vision.  
816 *Trends Biochem Sci* 35: 400-410.

- 817 Wang, S., K. L. Tan, M. A. Agosto, B. Xiong, S. Yamamoto *et al.*, 2014 The retromer  
818 complex is required for rhodopsin recycling and its loss leads to photoreceptor  
819 degeneration. *PLoS Biol* 12: e1001847.
- 820 Wen, X. H., L. Shen, R. S. Brush, N. Michaud, M. R. Al-Ubaidi *et al.*, 2009 Overexpression  
821 of rhodopsin alters the structure and photoresponse of rod photoreceptors. *Biophys J*  
822 96: 939-950.
- 823 Will, C. L., and R. Luhrmann, 2011 Spliceosome structure and function. *Cold Spring Harb*  
824 *Perspect Biol* 3: pii: a003707.
- 825 Winkler, S., N. Gscheidel and M. Brand, 2011 Mutant generation in vertebrate model  
826 organisms by TILLING. *Methods Mol Biol* 770: 475-504.
- 827 Winkler, S., A. Schwabedissen, D. Backasch, C. Bokel, C. Seidel *et al.*, 2005 Target-selected  
828 mutant screen by TILLING in *Drosophila*. *Genome Res* 15: 718-723.
- 829 Xiong, B., V. Bayat, M. Jaiswal, K. Zhang, H. Sandoval *et al.*, 2012 Crag is a GEF for Rab11  
830 required for rhodopsin trafficking and maintenance of adult photoreceptor cells. *PLoS*  
831 *Biol* 10: e1001438.
- 832 Xiong, B., and H. J. Bellen, 2013 Rhodopsin homeostasis and retinal degeneration: lessons  
833 from the fly. *Trends Neurosci* 36: 652-660.
- 834 Yin, J., J. Brocher, U. Fischer and C. Winkler, 2011 Mutant Prpf31 causes pre-mRNA  
835 splicing defects and rod photoreceptor cell degeneration in a zebrafish model for  
836 Retinitis pigmentosa. *Mol Neurodegener* 6: 56.
- 837 Yuan, L., M. Kawada, N. Havlioglu, H. Tang and J. Y. Wu, 2005 Mutations in PRPF31  
838 inhibit pre-mRNA splicing of rhodopsin gene and cause apoptosis of retinal cells. *J*  
839 *Neurosci* 25: 748-757.
- 840 Zhang, S. X., E. Sanders, S. J. Fliesler and J. J. Wang, 2014 Endoplasmic reticulum stress and  
841 the unfolded protein responses in retinal degeneration. *Exp Eye Res* 125: 30-40.
- 842 Zhao, C., D. L. Bellur, S. Lu, F. Zhao, M. A. Grassi *et al.*, 2009 Autosomal-dominant retinitis  
843 pigmentosa caused by a mutation in SNRNP200, a gene required for unwinding of  
844 U4/U6 snRNAs. *Am J Hum Genet* 85: 617-627.
- 845
- 846

## 847 **Figure Legends**

848

### 849 **Figure 1: *Prp31* mutant flies have no gross morphological abnormalities at eclosion.**

850 (A) Schematic of chromosome arm 3L. *Prp31* and *scarlet* (*st*) are situated 2 cM apart (3-42  
851 and 3-44, respectively; cytological positions 71B6 and 73A3, respectively; [www.flybase.org](http://www.flybase.org)).

852 In both *Prp31* mutant alleles the marker *st*<sup>1</sup> from the original mutagenized chromosome (*ru st*  
853 *e ca*) is retained. The three deficiencies used cover the *Prp31* locus, but not the *st* locus.

854 (B) Schematic overview of the Prpf31 protein. The figure is drawn to scale using IBS (LIU  
855 *et al.* 2015). Domains described here are indicated. The two *Prp31* alleles used here carry  
856 non-conservative missense mutations, G90R in *Prp31*<sup>P17</sup> and P277L in *Prp31*<sup>P18</sup>.

857 (C-F) Representative bright-field images of Toluidine-blue stained semi-thin sections of  
858 eyes of *w\** (C), *w\*;; st*<sup>1/+</sup>(D), *w\*;;Prp31*<sup>P18</sup>, *st*<sup>1/+</sup> (E), and *w\*;;Prp31*<sup>P17</sup>, *st*<sup>1/+</sup> (F). Upon  
859 eclosion, flies were kept for two days under regular light conditions. Note that the number and  
860 stereotypic arrangement of photoreceptor cells within the mutant ommatidia are not affected.

861 Scale bar = 10µm.

862

### 863 **Figure 2: PRCs of heterozygous *Prp31*<sup>P17</sup> or *Prp31*<sup>P18</sup> flies undergo light-dependent 864 degeneration.**

865 (A-D) Representative bright-field images of Toluidine-blue stained semi-thin sections of eyes  
866 of *w\** (A), *w\*;; st*<sup>1/+</sup>(B), *w\*;;Prp31*<sup>P18</sup>, *st*<sup>1/+</sup> (C), and *w\*;;Prp31*<sup>P17</sup>, *st*<sup>1/+</sup> (D). Upon  
867 eclosion, flies were kept for two days under regular light conditions and then subjected to a  
868 degeneration paradigm of 7 days of continuous, high intensity light exposure. Whereas in *w\**  
869 (A) most ommatidia (red outline) display 7 rhabdomeres indicative of the 7 PRCs, *w\*;; st*<sup>1/+</sup>  
870 and mutant ommatidia (B-D, red outlines) display fewer rhabdomeres per ommatidium  
871 indicative of degeneration. Scale bar = 10µm.

872 (E) Quantification of retinal degeneration as indicated by the number of surviving  
873 rhabdomeres observed upon high intensity, continuous light exposure. Bars represent mean ±  
874 s.e.m. (a minimum of n=60 ommatidia from eyes of 3 biological replicates) of the percent  
875 frequency of ommatidia displaying 1-7 rhabdomeres (Y-axis). Genotypes are indicated below.  
876 Numbers on the graphs indicate the mean number of ommatidia displaying the full  
877 complement of 7 rhabdomeres.

878

### 879 **Figure 3: Reduced blue-green light intensity strongly reduces damage in *w\*;;st*<sup>1/+</sup> eyes.**



880 (A) Intensity profile (in counts as measured by a spectrometer) of light for the wavelength  
881 range (in nanometres) on the X-axis (the corresponding colour indicated above). The solid  
882 line represents the profile for the routine light degeneration paradigm, whereas the dashed line  
883 represents the intensity profile obtained when using a filter. Note that especially the intensity  
884 of the blue-green light is strongly reduced when using of a filter.

885 (B) Quantification of retinal degeneration as indicated by the number of surviving  
886 rhabdomeres observed upon exposure to continuous, high-intensity light. Bars represent mean  
887  $\pm$  s.e.m. (a minimum of n=60 ommatidia from eyes of 3 biological replicates) of the percent  
888 frequency of ommatidia displaying 1-7 rhabdomeres (Y-axis). Genotypes are indicated below.  
889 For each genotype, the solid bar indicates surviving rhabdomeres under routine light-  
890 degeneration paradigm (corresponding to the solid line intensity profile in A), whereas the  
891 striped bar indicates surviving rhabdomeres upon reduced light intensity exposure (dashed  
892 line intensity profile in A).

893

894 **Figure 4: RNAi-mediated knock-down of *Prp31* results in light-dependent retinal**  
895 **degeneration.**

896 (A-B) Representative bright-field images of Toluidine-blue stained semi-thin sections of eyes  
897 of *GMR-w<sup>IR</sup>;Rh1-Gal4>UAS dicer* (A; control) and *GMR-w<sup>IR</sup>;Rh1-Gal4>UAS dicer + UAS*  
898 *Prp31RNAi* (B; *Prp31 RNAi*). Upon eclosion, flies were kept for two days under regular light  
899 conditions and then subjected to a degeneration paradigm of 7 days of continuous, high-  
900 intensity light exposure. In case of *Prp31 RNAi*, fewer ommatidia with 7 rhabdomeres are  
901 seen. Scale bar= 10 $\mu$ m

902 (C) Quantification of retinal degeneration as indicated by the number of surviving  
903 rhabdomeres observed upon high intensity, continuous light exposure. Bars represent mean  $\pm$   
904 s.e.m. (a minimum of n=60 ommatidia from eyes of 3 biological replicates) of the percent  
905 frequency of ommatidia displaying 1-7 rhabdomeres (X-axis). Genotypes are indicated below.  
906 Whilst 71% of control ommatidia have 7 rhabdomeres, this number is reduced to 48% in the  
907 knockdown of *Prp31* by RNAi.

908

909 **Figure 5: Flies heterozygous for deficiencies that cover *Prp31*, but not the *scarlet* locus,**  
910 **undergo light-dependent degeneration.**

911 (A-D) Representative bright-field images of Toluidine-blue stained semi-thin sections of eyes  
912 of males of ;*cn, bw*; (A), ;*cn, bw; Df (3L) Exel 6262/+* (B), ;*cn, bw; Df (3L) ED217/+* (C),  
913 and ;*cn, bw; Df (3L) ED218/+* (D). Upon eclosion, flies were kept for two days under regular

914 light conditions and then subjected to a degeneration paradigm of 7 days of continuous, high  
915 intensity light exposure. Scale bar= 10 $\mu$ m.

916 (E) Quantification of retinal degeneration as indicated by the number of surviving  
917 rhabdomeres observed upon high intensity, continuous light exposure. Bars represent mean  $\pm$   
918 s.e.m. (a minimum of n=60 ommatidia from eyes of 3 biological replicates) of the percent  
919 frequency of ommatidia displaying 1-7 rhabdomeres (X-axis). Genotypes are indicated below.

920

921 **Figure 6: Hallmarks of degeneration in heterozygous *Prp31* mutants alleles revealed by**  
922 **TEM**

923 (A-F) are representative transmission electron microscopy images of 70 nm sections of eyes  
924 of *w\** (A), *w\*;; st<sup>l</sup>/+*(B), *w\*;;Prp31<sup>P18</sup>, st<sup>l</sup>/+* (C), and *w\*;;Prp31<sup>P17</sup>, st<sup>l</sup>/+* (D) ;*cn, bw; Df*  
925 (*3L*) *ED217/+* (E), and *w\*;; crb<sup>P13A9</sup>* (F) males. Upon eclosion, flies were kept for two days  
926 under regular light conditions and then subjected to a degeneration paradigm of 7 days of  
927 continuous, high intensity light exposure.

928 Seven rhabdomeres are visible in the 3 ommatidia of the genetic controls (A-B). However,  
929 some rhabdomeres appear smaller or have lost their stereotypic appearance due to the loss of  
930 the microvillar structure (red asterisk). In heterozygous *Prp31* mutants (C-D) and in *Df* (*3L*)  
931 *ED217/+* (E), some ommatidia (red outline) with PRCs lacking some rhabdomeres are  
932 obvious. All other ommatidia have PRCs with smaller or disintegrating rhabdomeres (red  
933 asterisk). The presence of large aggregates of electron dense material, another hallmark of  
934 degeneration, is more pronounced in perturbations of the *Prp31* gene (C-E, blue arrowheads).  
935 In *crb<sup>P13A9</sup>* (F) all the above aspects of degeneration are visible, but, degeneration appears to be  
936 more severe than in the *Prp31* mutants. Scale bar = 2 $\mu$ m.

937

938 **Figure 7: Increased Rhodopsin accumulation is associated upon perturbation of *Prp31***

939 Representative confocal images of 1 $\mu$ m optical sections from 12 $\mu$ m cross-sections (A-G), or  
940 whole mounts (A'- E') of eyes of adult males with the genotypes indicated, stained with anti-  
941 Rh1. Red arrowheads indicate the rhabdomere, depicted in cross-sections (A-G) and along its  
942 length (A'-G'), with the distal end directed towards the top and the proximal end directed  
943 towards the bottom. Rh1 staining is more intense in the rhabdomeric membrane of  
944 *w\*;;Prp31<sup>P18</sup>, st<sup>l</sup>/+* (C) as compared to controls, *w\** (A), *w\*;; st<sup>l</sup>/+* (B). Increased intensity of  
945 Rh1 staining along the rhabdomeres and in sub-rhabdomeric regions is also observed in whole  
946 mount preparations of the adult eye in the mutants (C') as compared to genetic controls (A',



947 B'). Rh1 staining is also more intense in *Df(3L) 218/+* (E-E') as compared to its genetic  
948 control *cn, bw* (D-D').

949 (G, F) Increased Rh1 immunostaining intensity observed upon knockdown of *Prp31* by RNAi  
950 (G) as compared to its genetic background (F). Scale bars = 10µm.

951 (H) Representative western blots for β-Tubulin and Rhodopsin-1 from head lysates of  
952 *w\*;;Prp31<sup>P18</sup>, st<sup>l</sup>/+* and its genetic background *w\*;;st<sup>l</sup>/+*.

953 (I) Quantification from biological replicates (n=4) from western blotting. Bars represent the  
954 Rh1 levels calculated from intensity measurements of blots after normalization compared to  
955 that of loading control (Tubulin). On average, Rh1 levels are increased by 340% in  
956 *w\*;;Prp31<sup>P18</sup>, st<sup>l</sup>/+* as compared to control, *w\*;;st<sup>l</sup>/+*. This increase is evident despite the  
957 variability in the magnitude of increase.

958

959 **Figure 8: A carotenoid-depleted diet limits the extent of light-induced degeneration in**  
960 **hemizygous *Prp31* mutants.**

961 Representative images of 1µm confocal optical sections from 12µm cryosections of male  
962 eyes, of the genotypes indicated. Tissues are immunostained for Rh1 (white) and labelled  
963 with phalloidin (magenta) and DAPI (green), to stain the rhabdomeres and nuclei,  
964 respectively.

965 (A-D) Overlay of all three channels, A'-D' are images showing the extracted channel (Rh1).  
966 Insets show digital magnification of individual ommatidia. Reduction in Rh1 levels and  
967 change in its localization from the rhabdomeres to a peri-nuclear localization is observed  
968 when flies are fed a carotenoid-depleted diet (B-D') as opposed to normal food (A-A').  
969 Arrowheads indicate Rh1 localization in the rhabdomere (inset A-A') as opposed to peri-  
970 nuclear localization (insets B-D'). Scale bar = 10µm. Inset scale bar = 5µm.

971 (E-H) Representative bright-field images of Toluidine-blue stained semi-thin sections of eyes  
972 of *w\** (E), *w\*;; st<sup>l</sup>/+* (F), *w\*;;Prp31<sup>P18</sup>, st<sup>l</sup>/+* (G), and, *w\*;;crb<sup>11A22</sup>* (H) adult males. Animals  
973 were raised on a carotenoid-depleted diet. Upon eclosion, they were aged for two days under  
974 regular light conditions and then subjected to a degeneration paradigm of exposure for 7 days  
975 to continuous, high-intensity light. Scale bar = 10µm.

976 (I) Quantification of retinal degeneration as indicated by the number of surviving  
977 rhabdomeres observed upon high intensity, continuous light exposure. Bars represent mean ±  
978 s.e.m. (a minimum of n=60 ommatidia from eyes of 3 biological replicates) of the percent  
979 frequency of ommatidia displaying 1-7 rhabdomeres (Y-axis). Genotypes are indicated below.

980

981 **Figure 9: Increased oxidative stress signalling in eyes of *Prp31* heterozygous flies is due**  
982 **to *st* in the genetic background.**

983 (A-J) are images of 1µm confocal optical sections from 12µm cryosections (A-C, G-H) or  
984 whole tissue preparations (D-F, I-J) of eyes of adult flies raised in regular light conditions.  
985 Sections (A-C, G-H) are immunostained for anti-GFP (green) and phalloidin (magenta) for  
986 labelling *gstD* activity (oxidative stress signalling) and rhabdomeres, respectively. Whole  
987 tissue preparations (D-F, I-J) are labelled with Dihydroethidium (DHE), an indicator for the  
988 levels of reactive oxygen species (ROS). Individual ommatidia are outlined in white. Basal  
989 levels of oxidative stress signalling are observed in the pigment cells (surrounding ommatidia)  
990 in controls (A). This is enhanced in *Prp31<sup>P18</sup>, st<sup>l</sup>/+*(B) and *st<sup>l</sup>/+* (C). Similarly, DHE levels  
991 are consistently increased in *w<sup>\*</sup>;Prp31<sup>P18</sup>, st<sup>l</sup>/+* (E) and *w<sup>\*</sup>;st<sup>l</sup>/+* (F). No obvious increase  
992 in *gstD*-GFP staining and in DHE staining was observed in *Df/+* (H and J) as compared to the  
993 control (G and I).

994



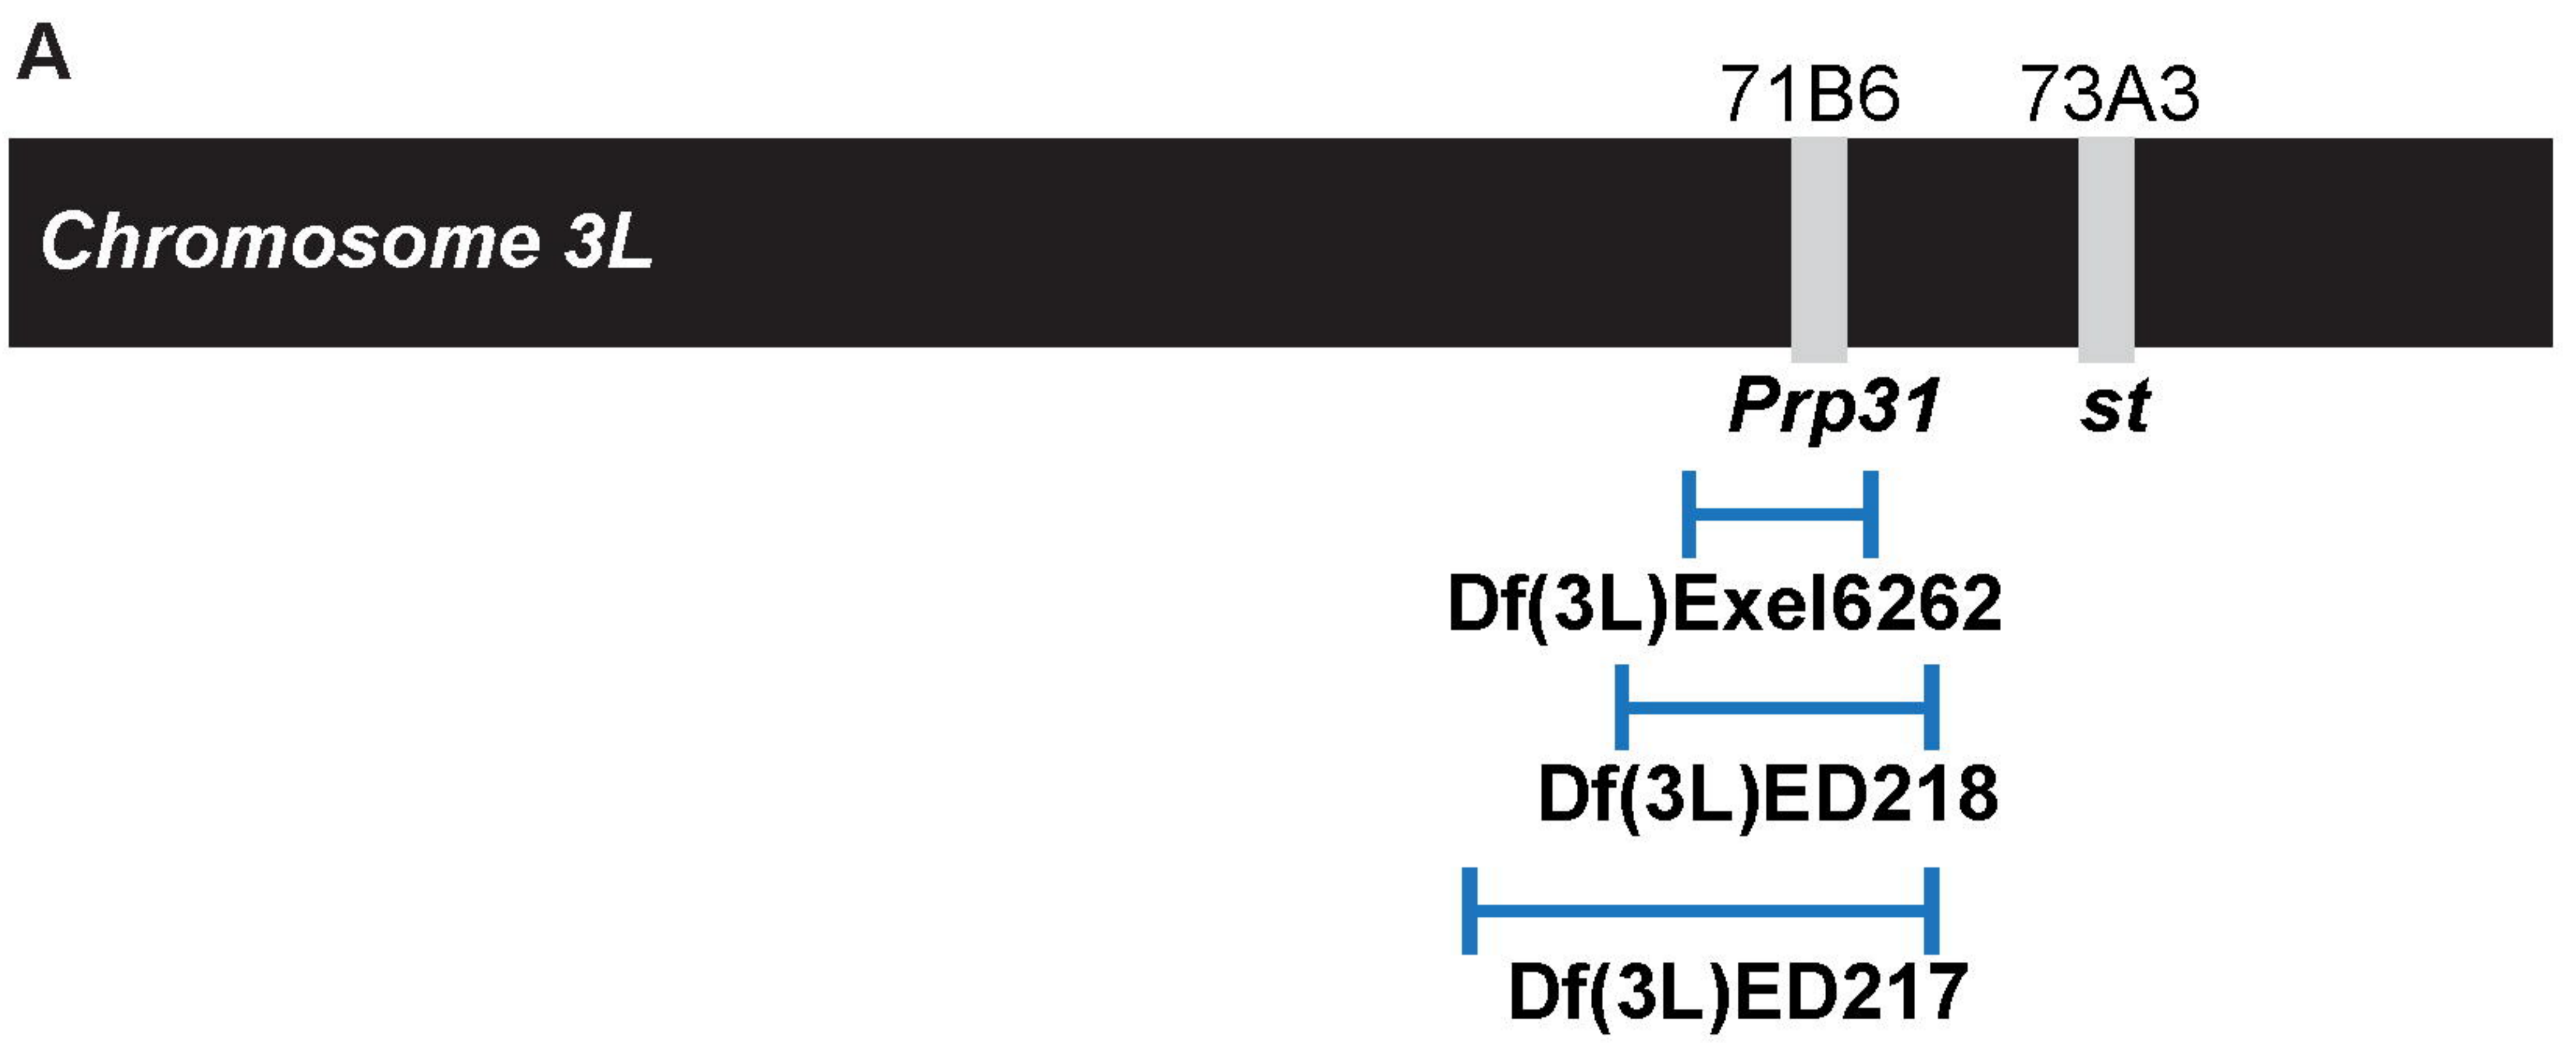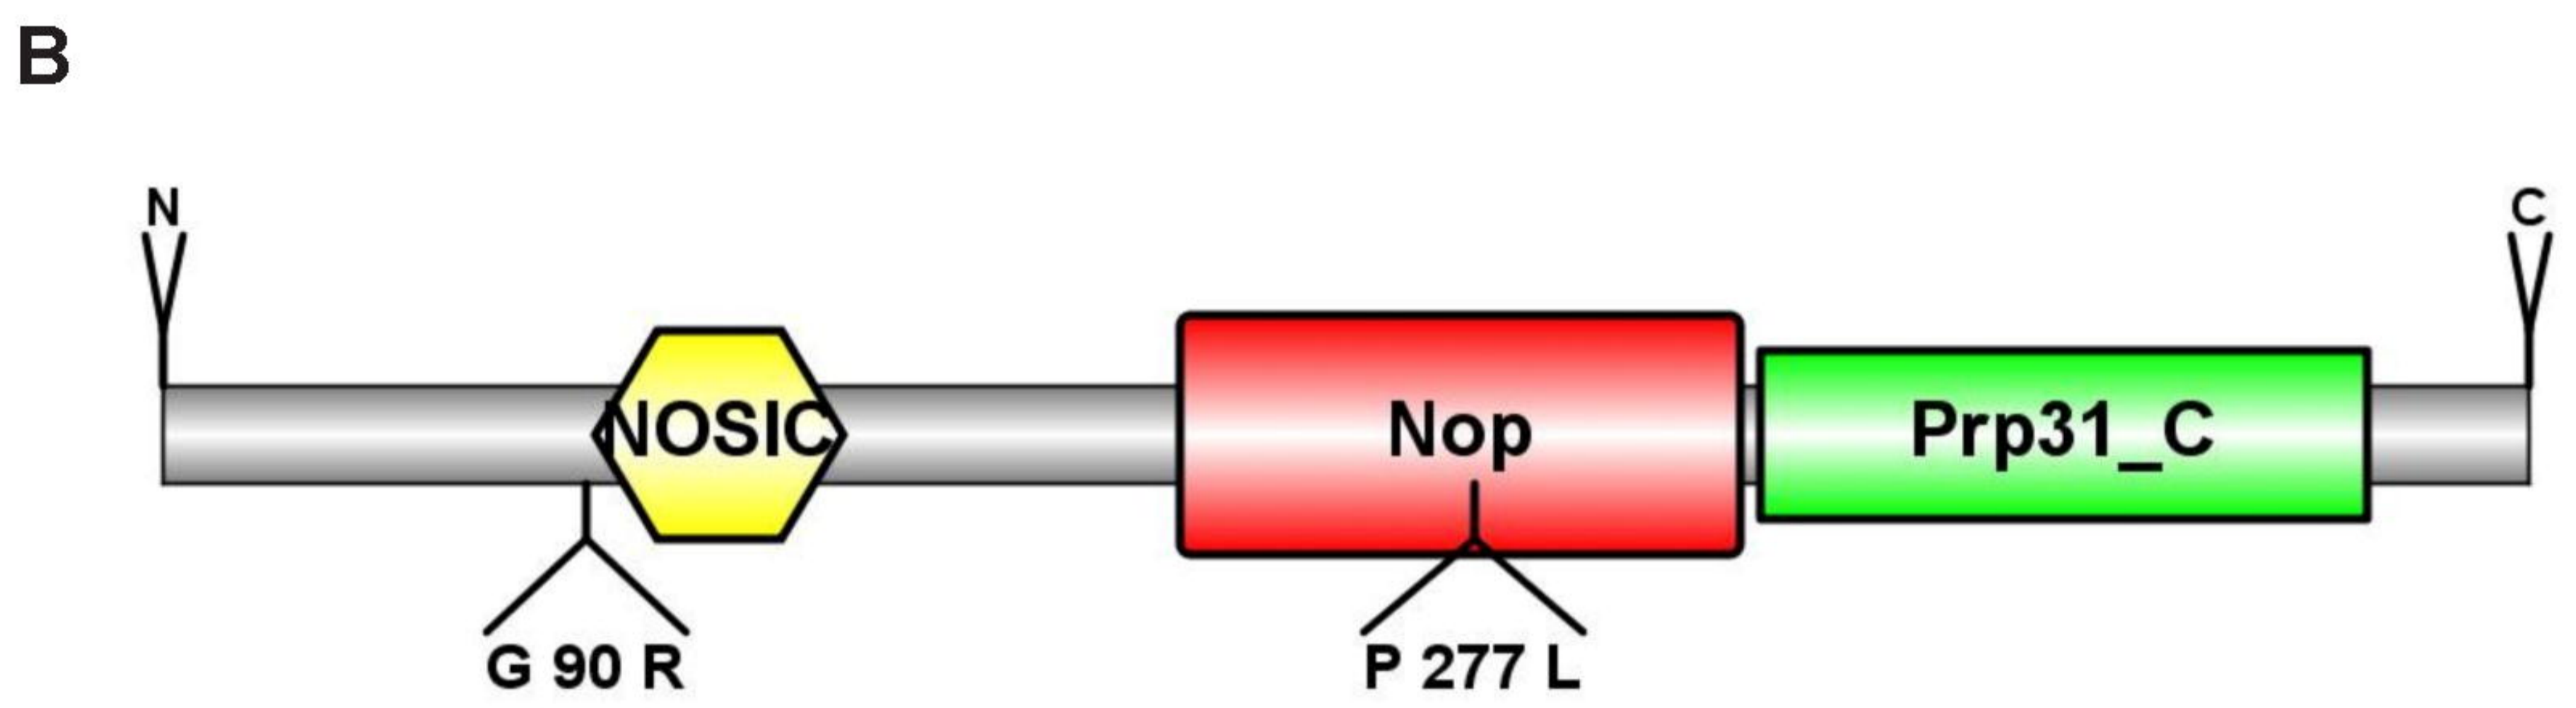

**C**

*w<sup>\*</sup>;;*

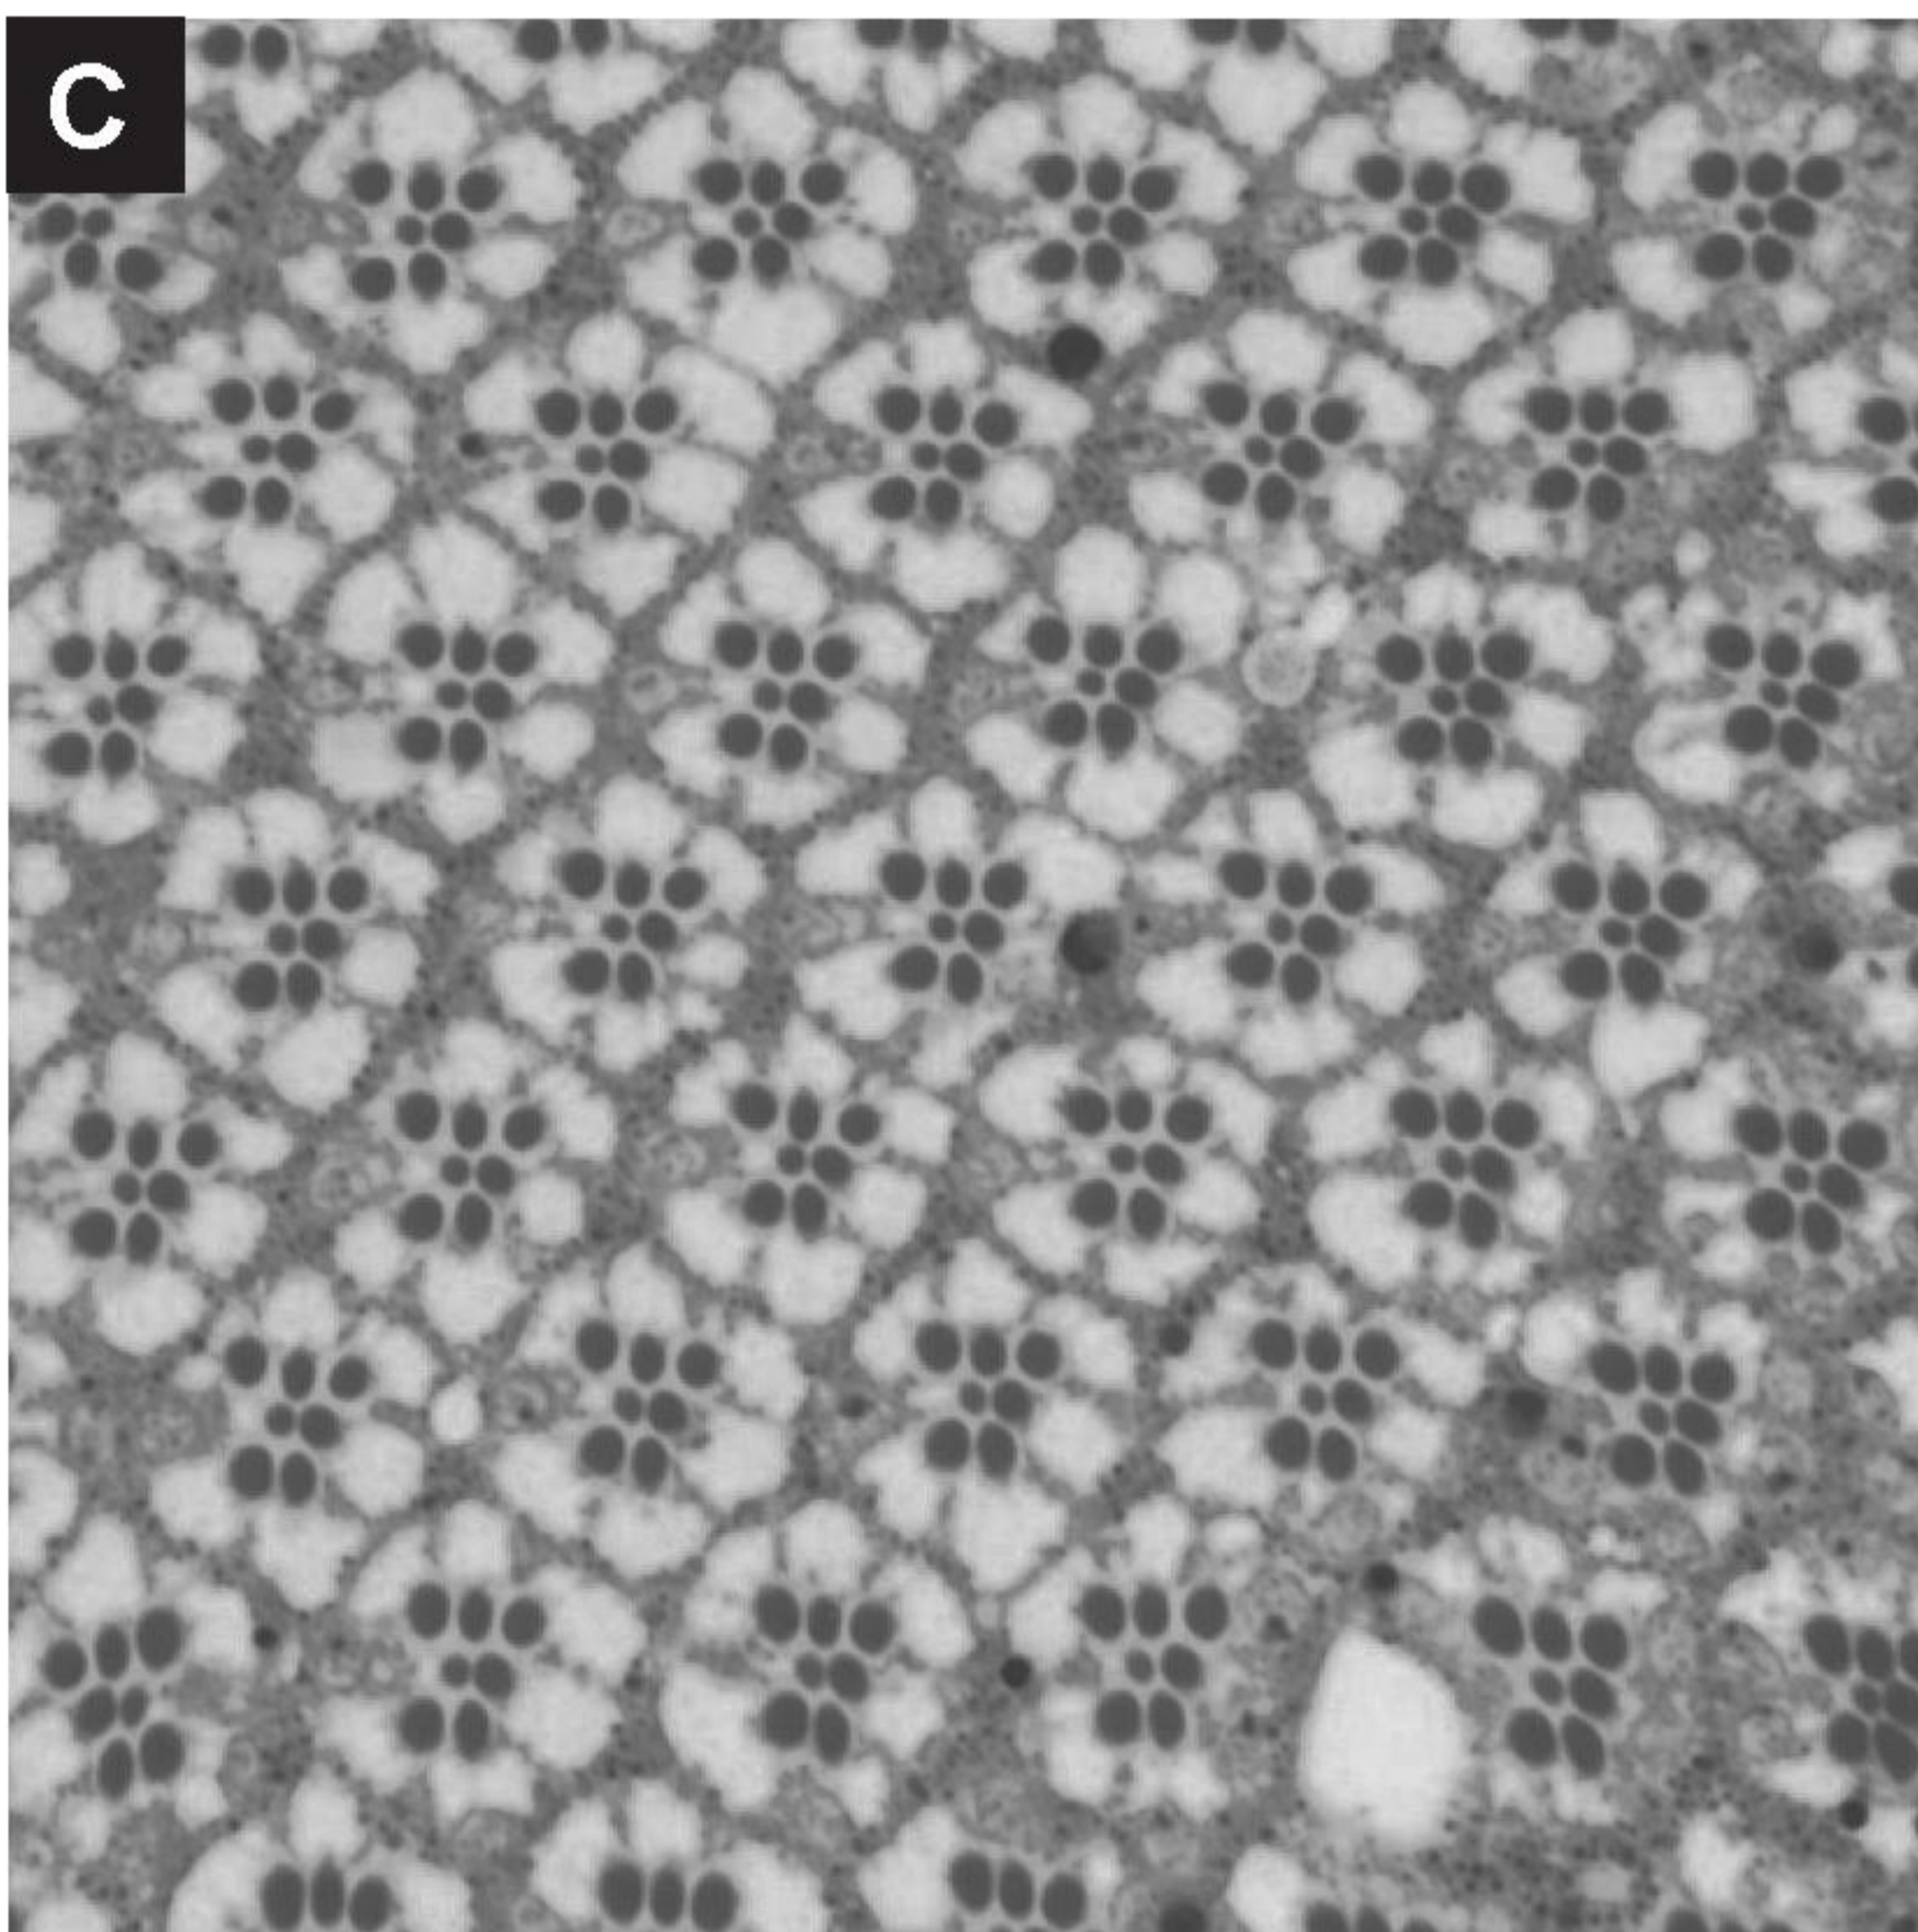

**D**

*w<sup>\*</sup>;;st<sup>1</sup>/+*

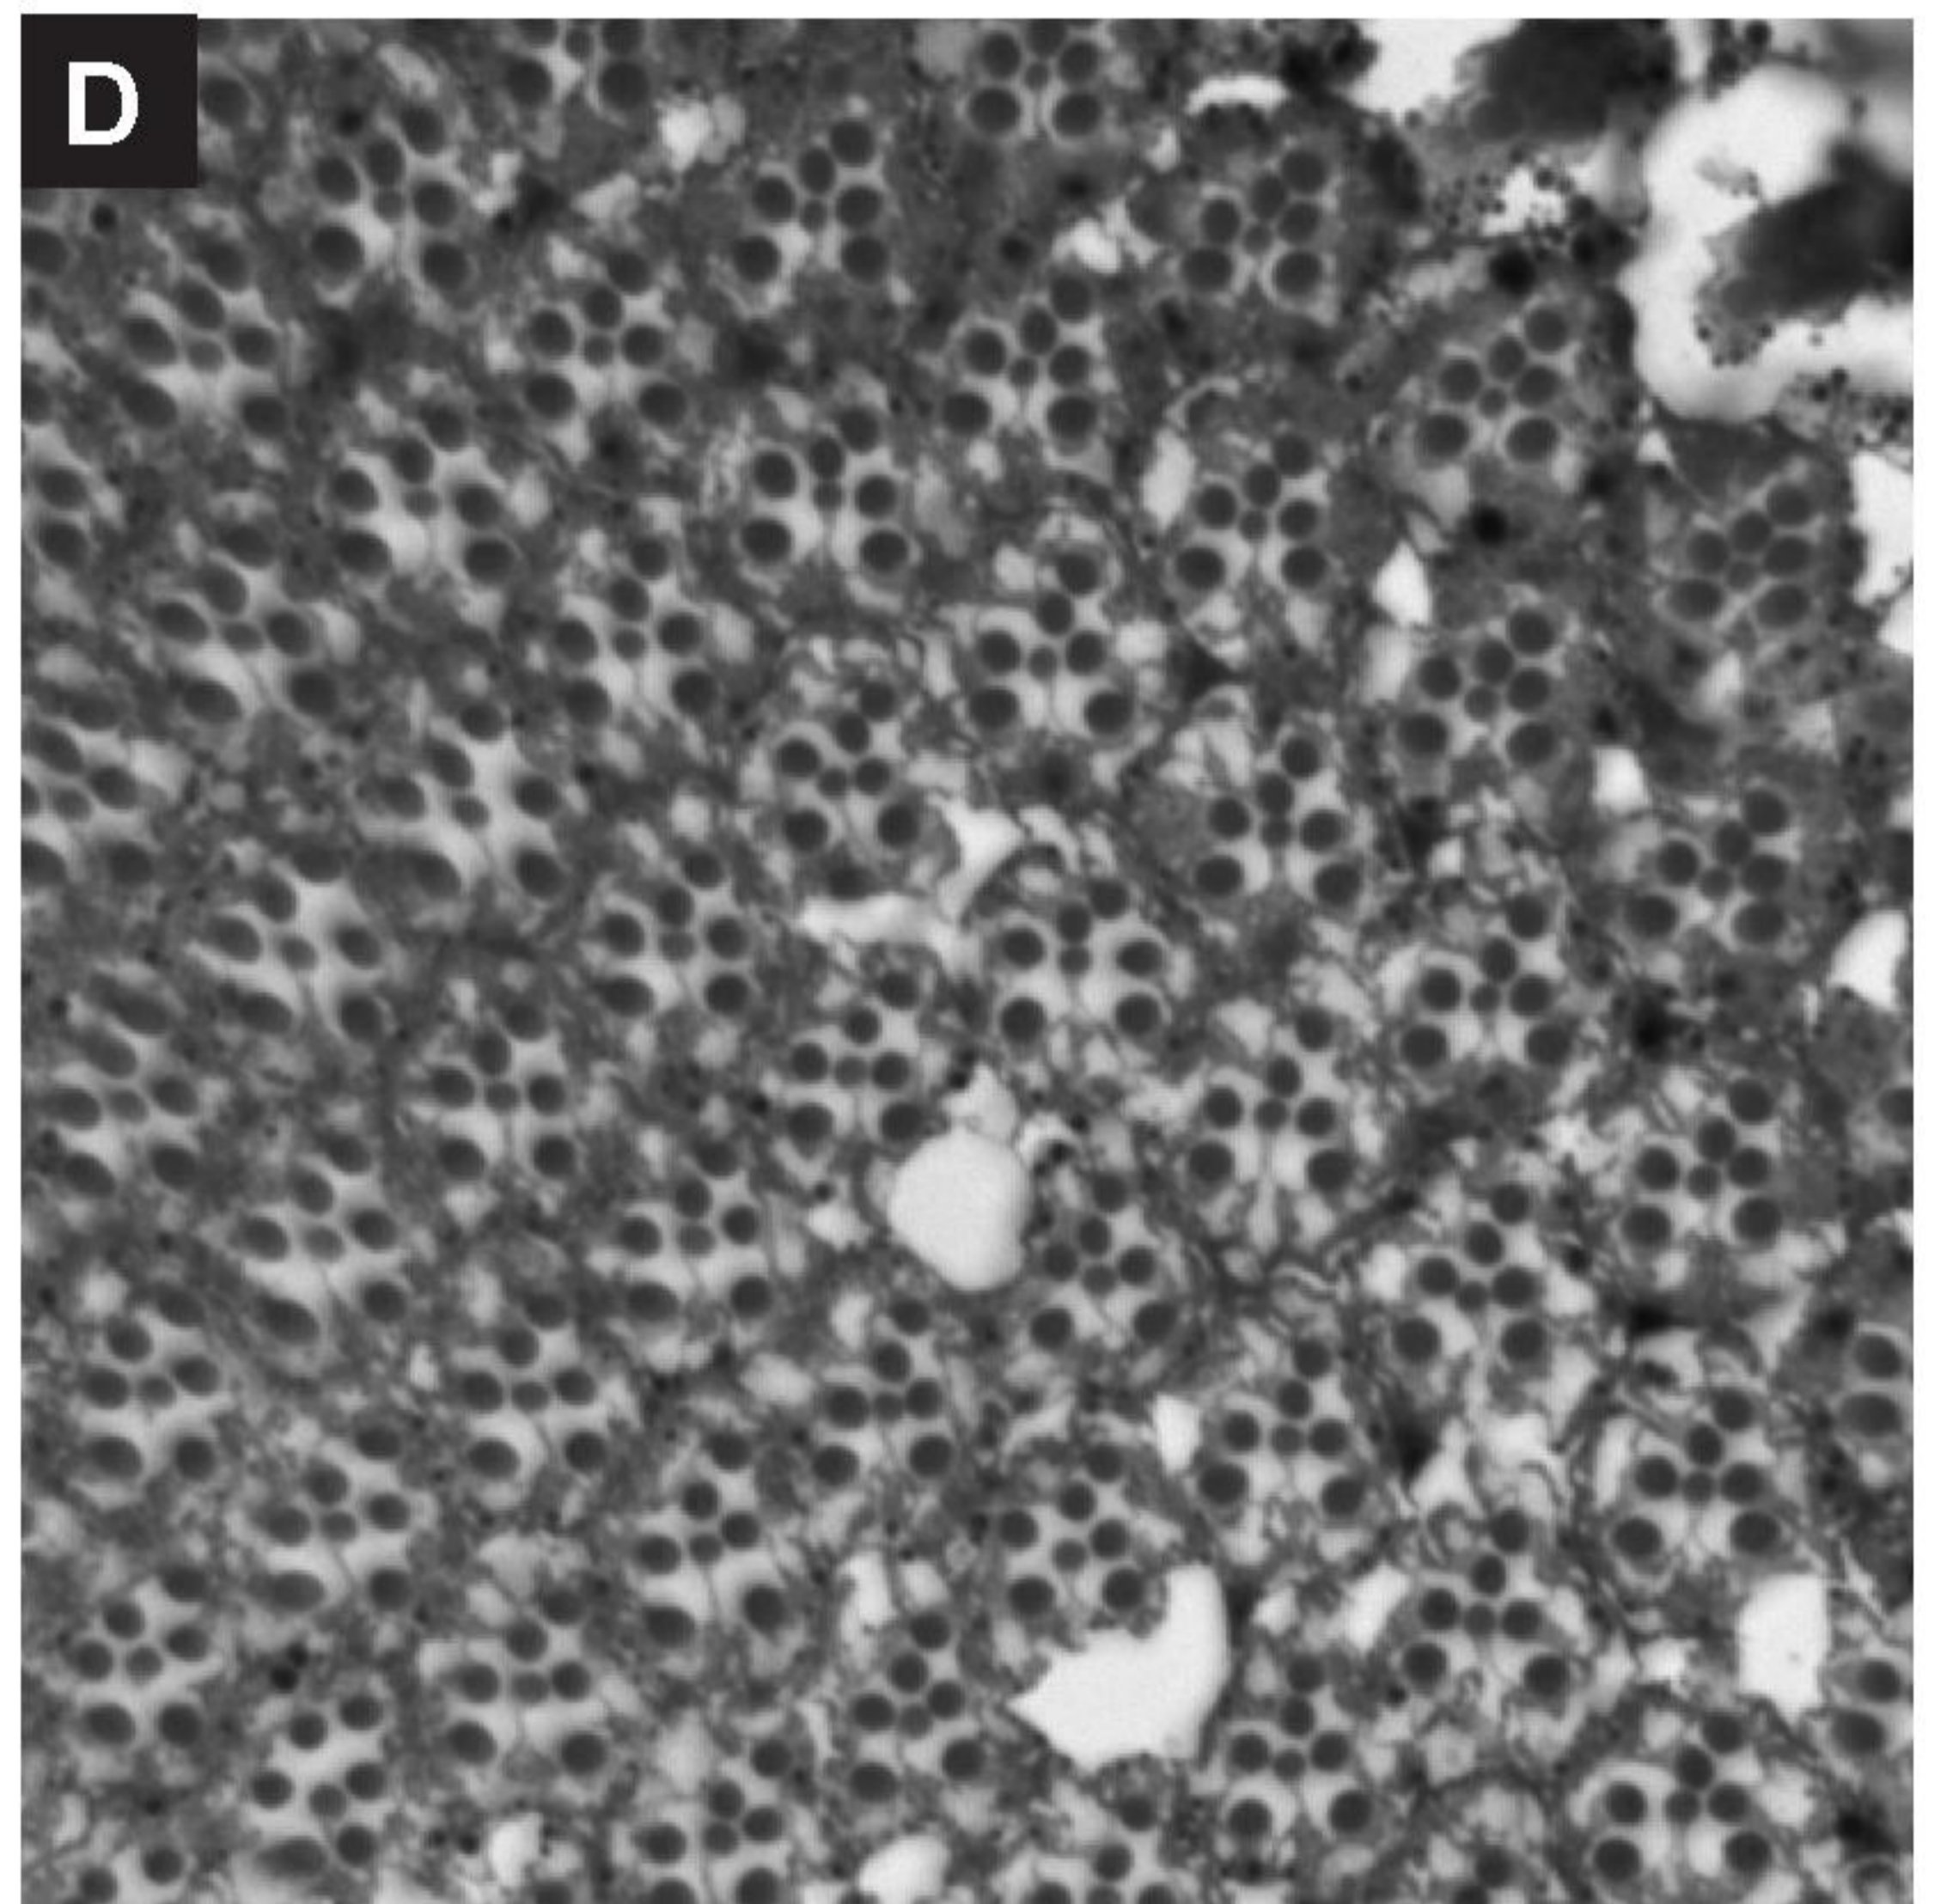

**E**

*w<sup>\*</sup>;;Prp31<sup>P18</sup>, st<sup>1</sup>/+*

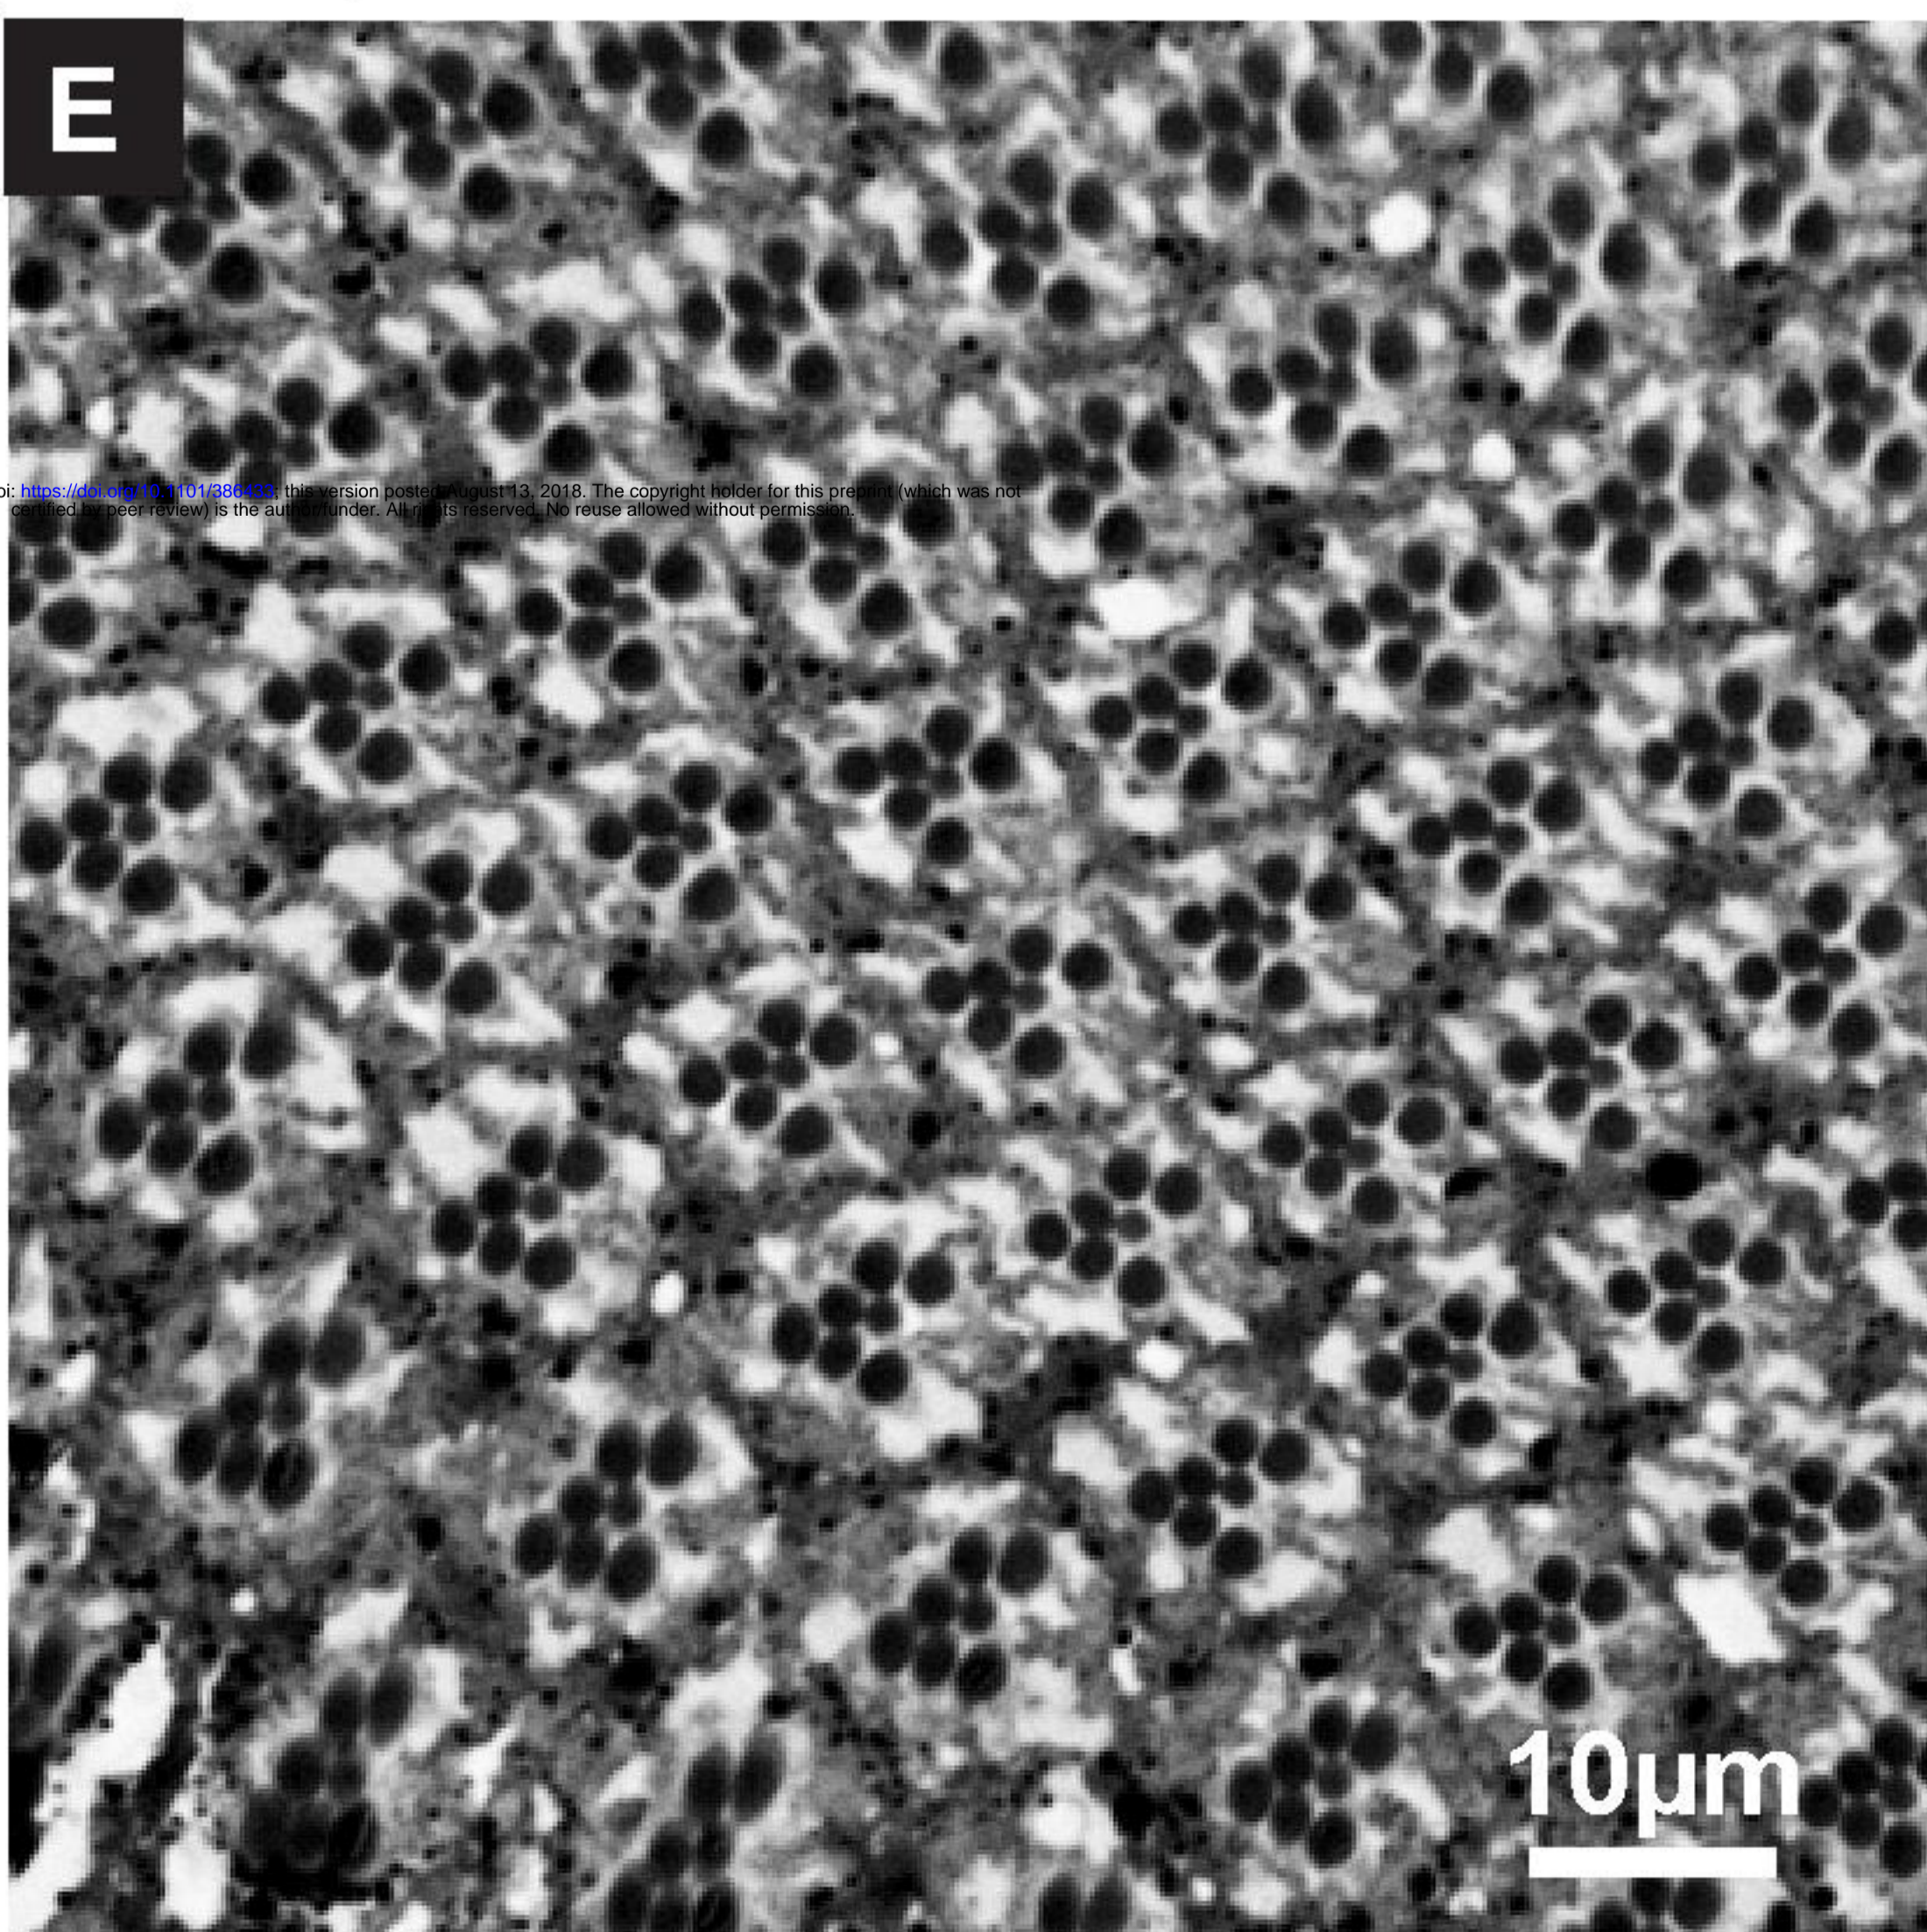

**F**

*w<sup>\*</sup>;;Prp31<sup>P17</sup>, st<sup>1</sup>/+*

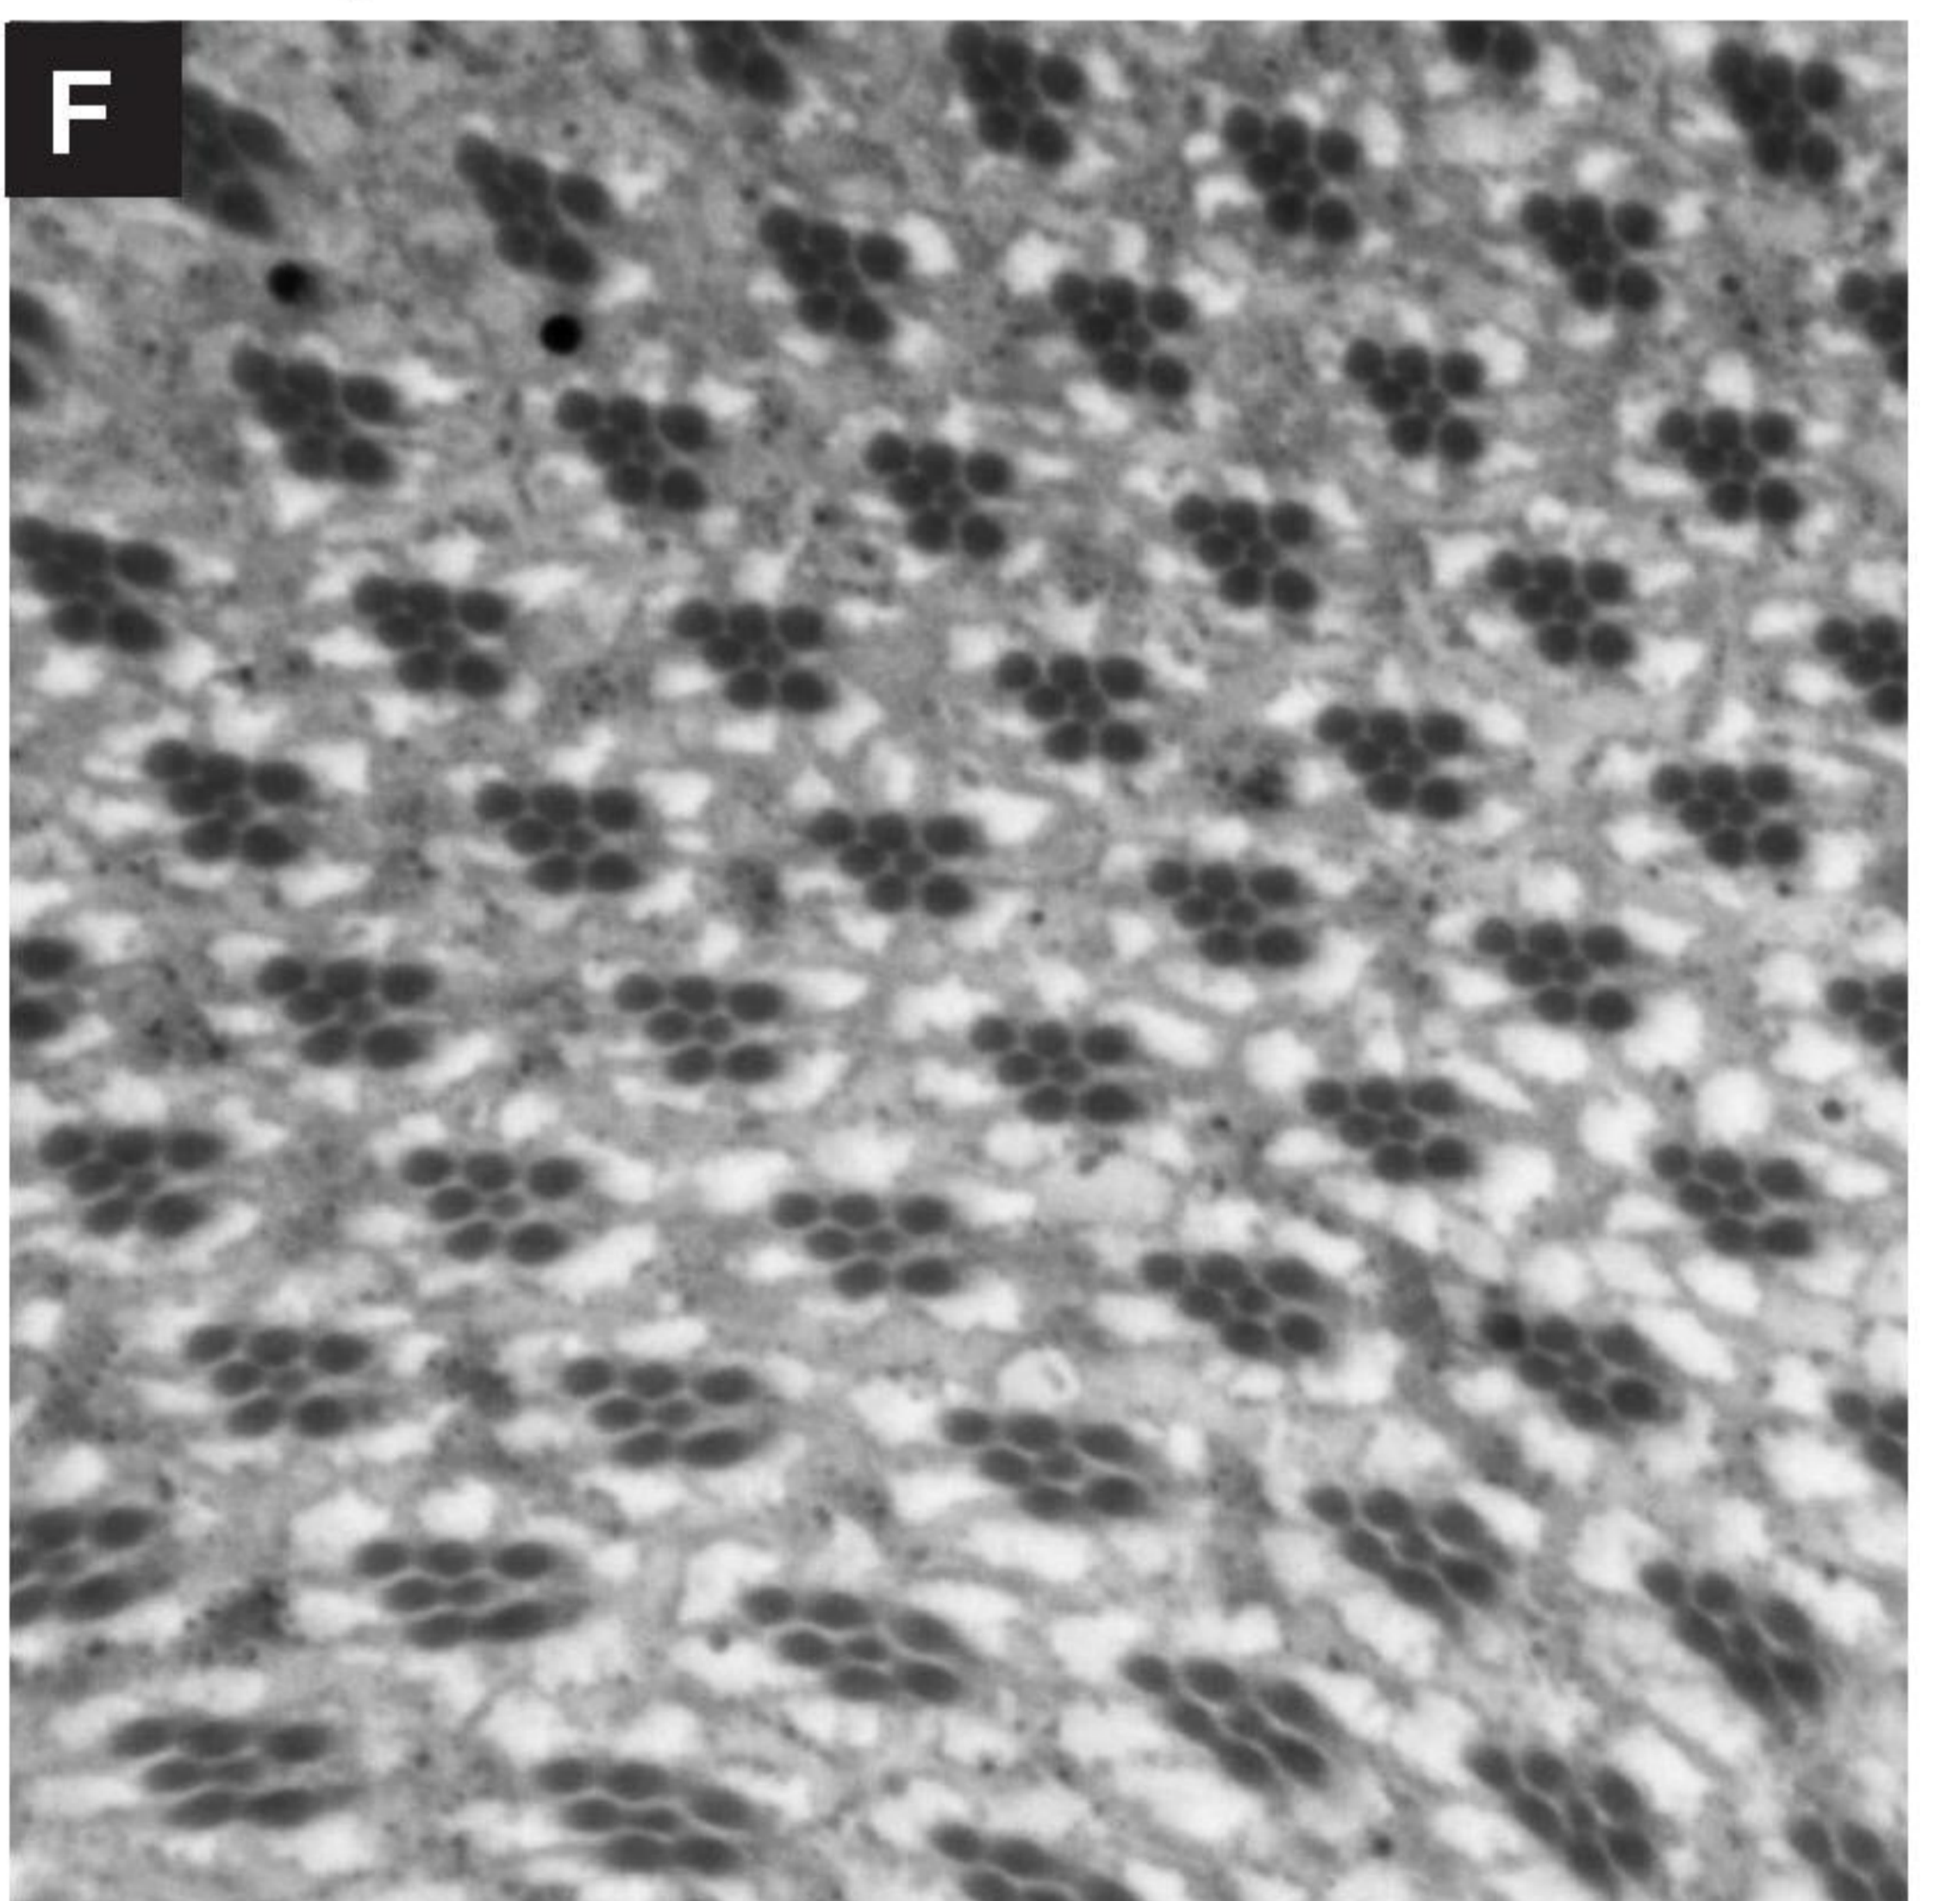

Figure 1



*w\*;;*

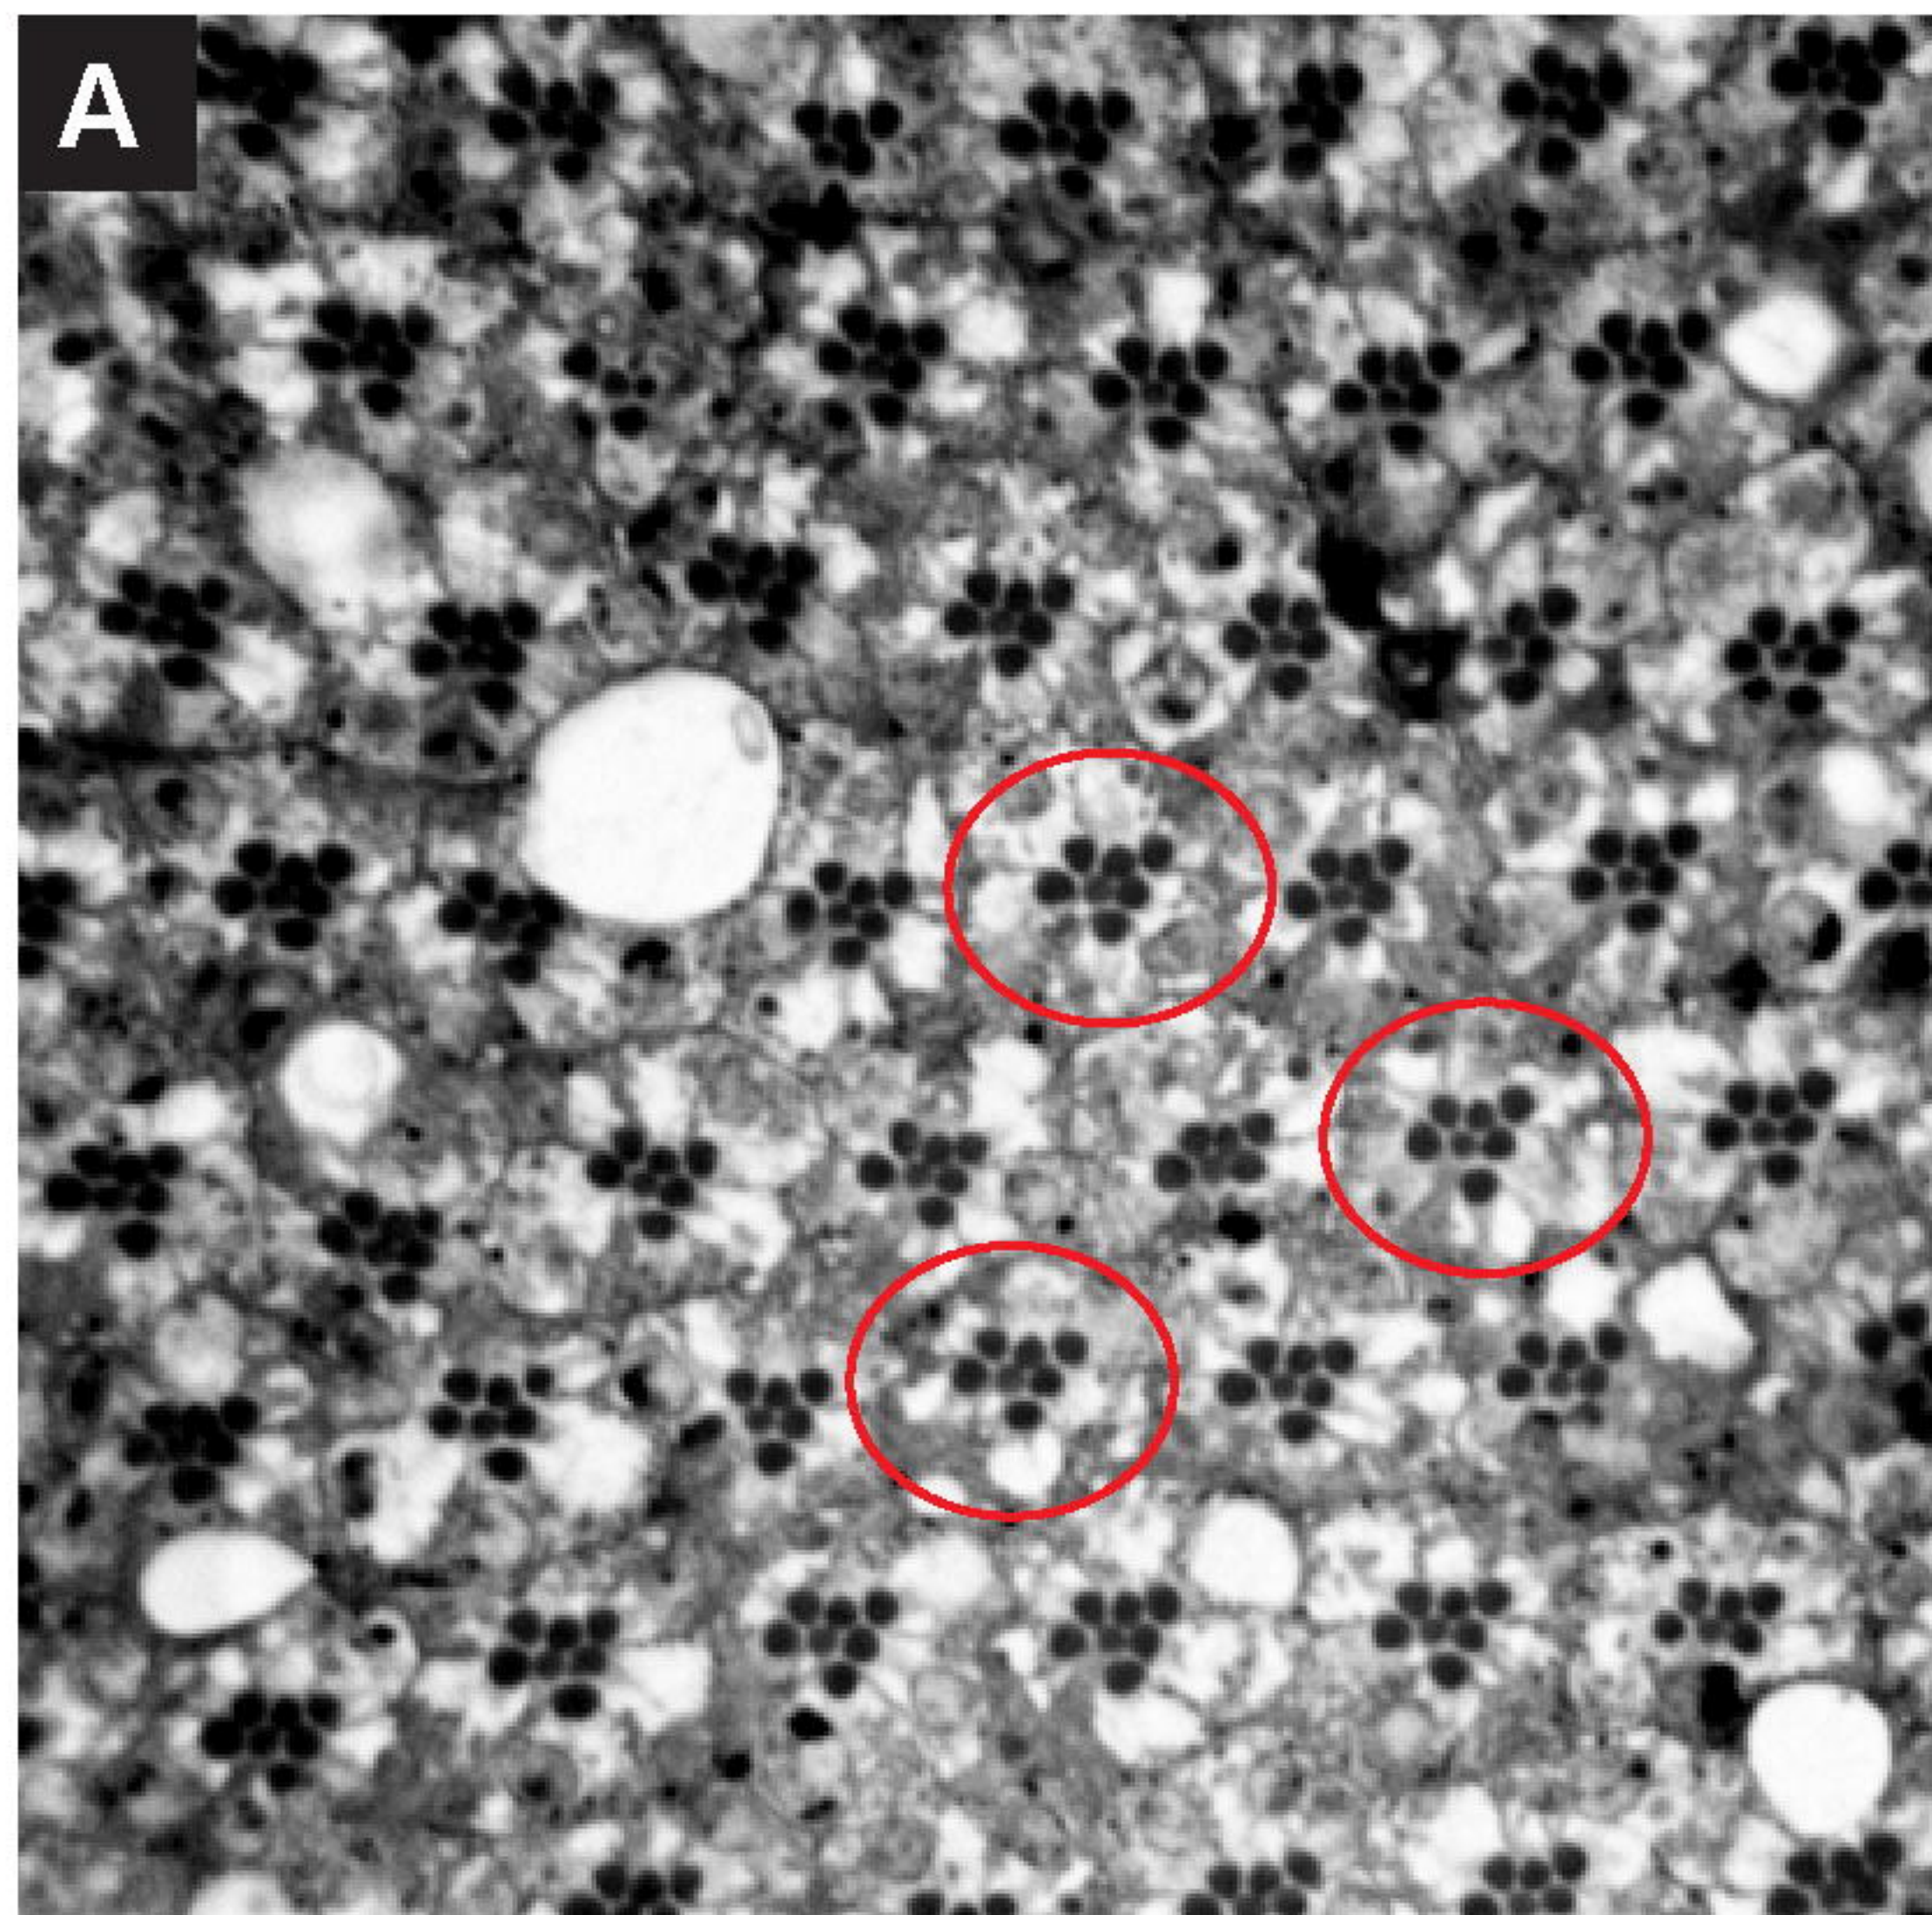

*w\*;;st<sup>1</sup>/+*

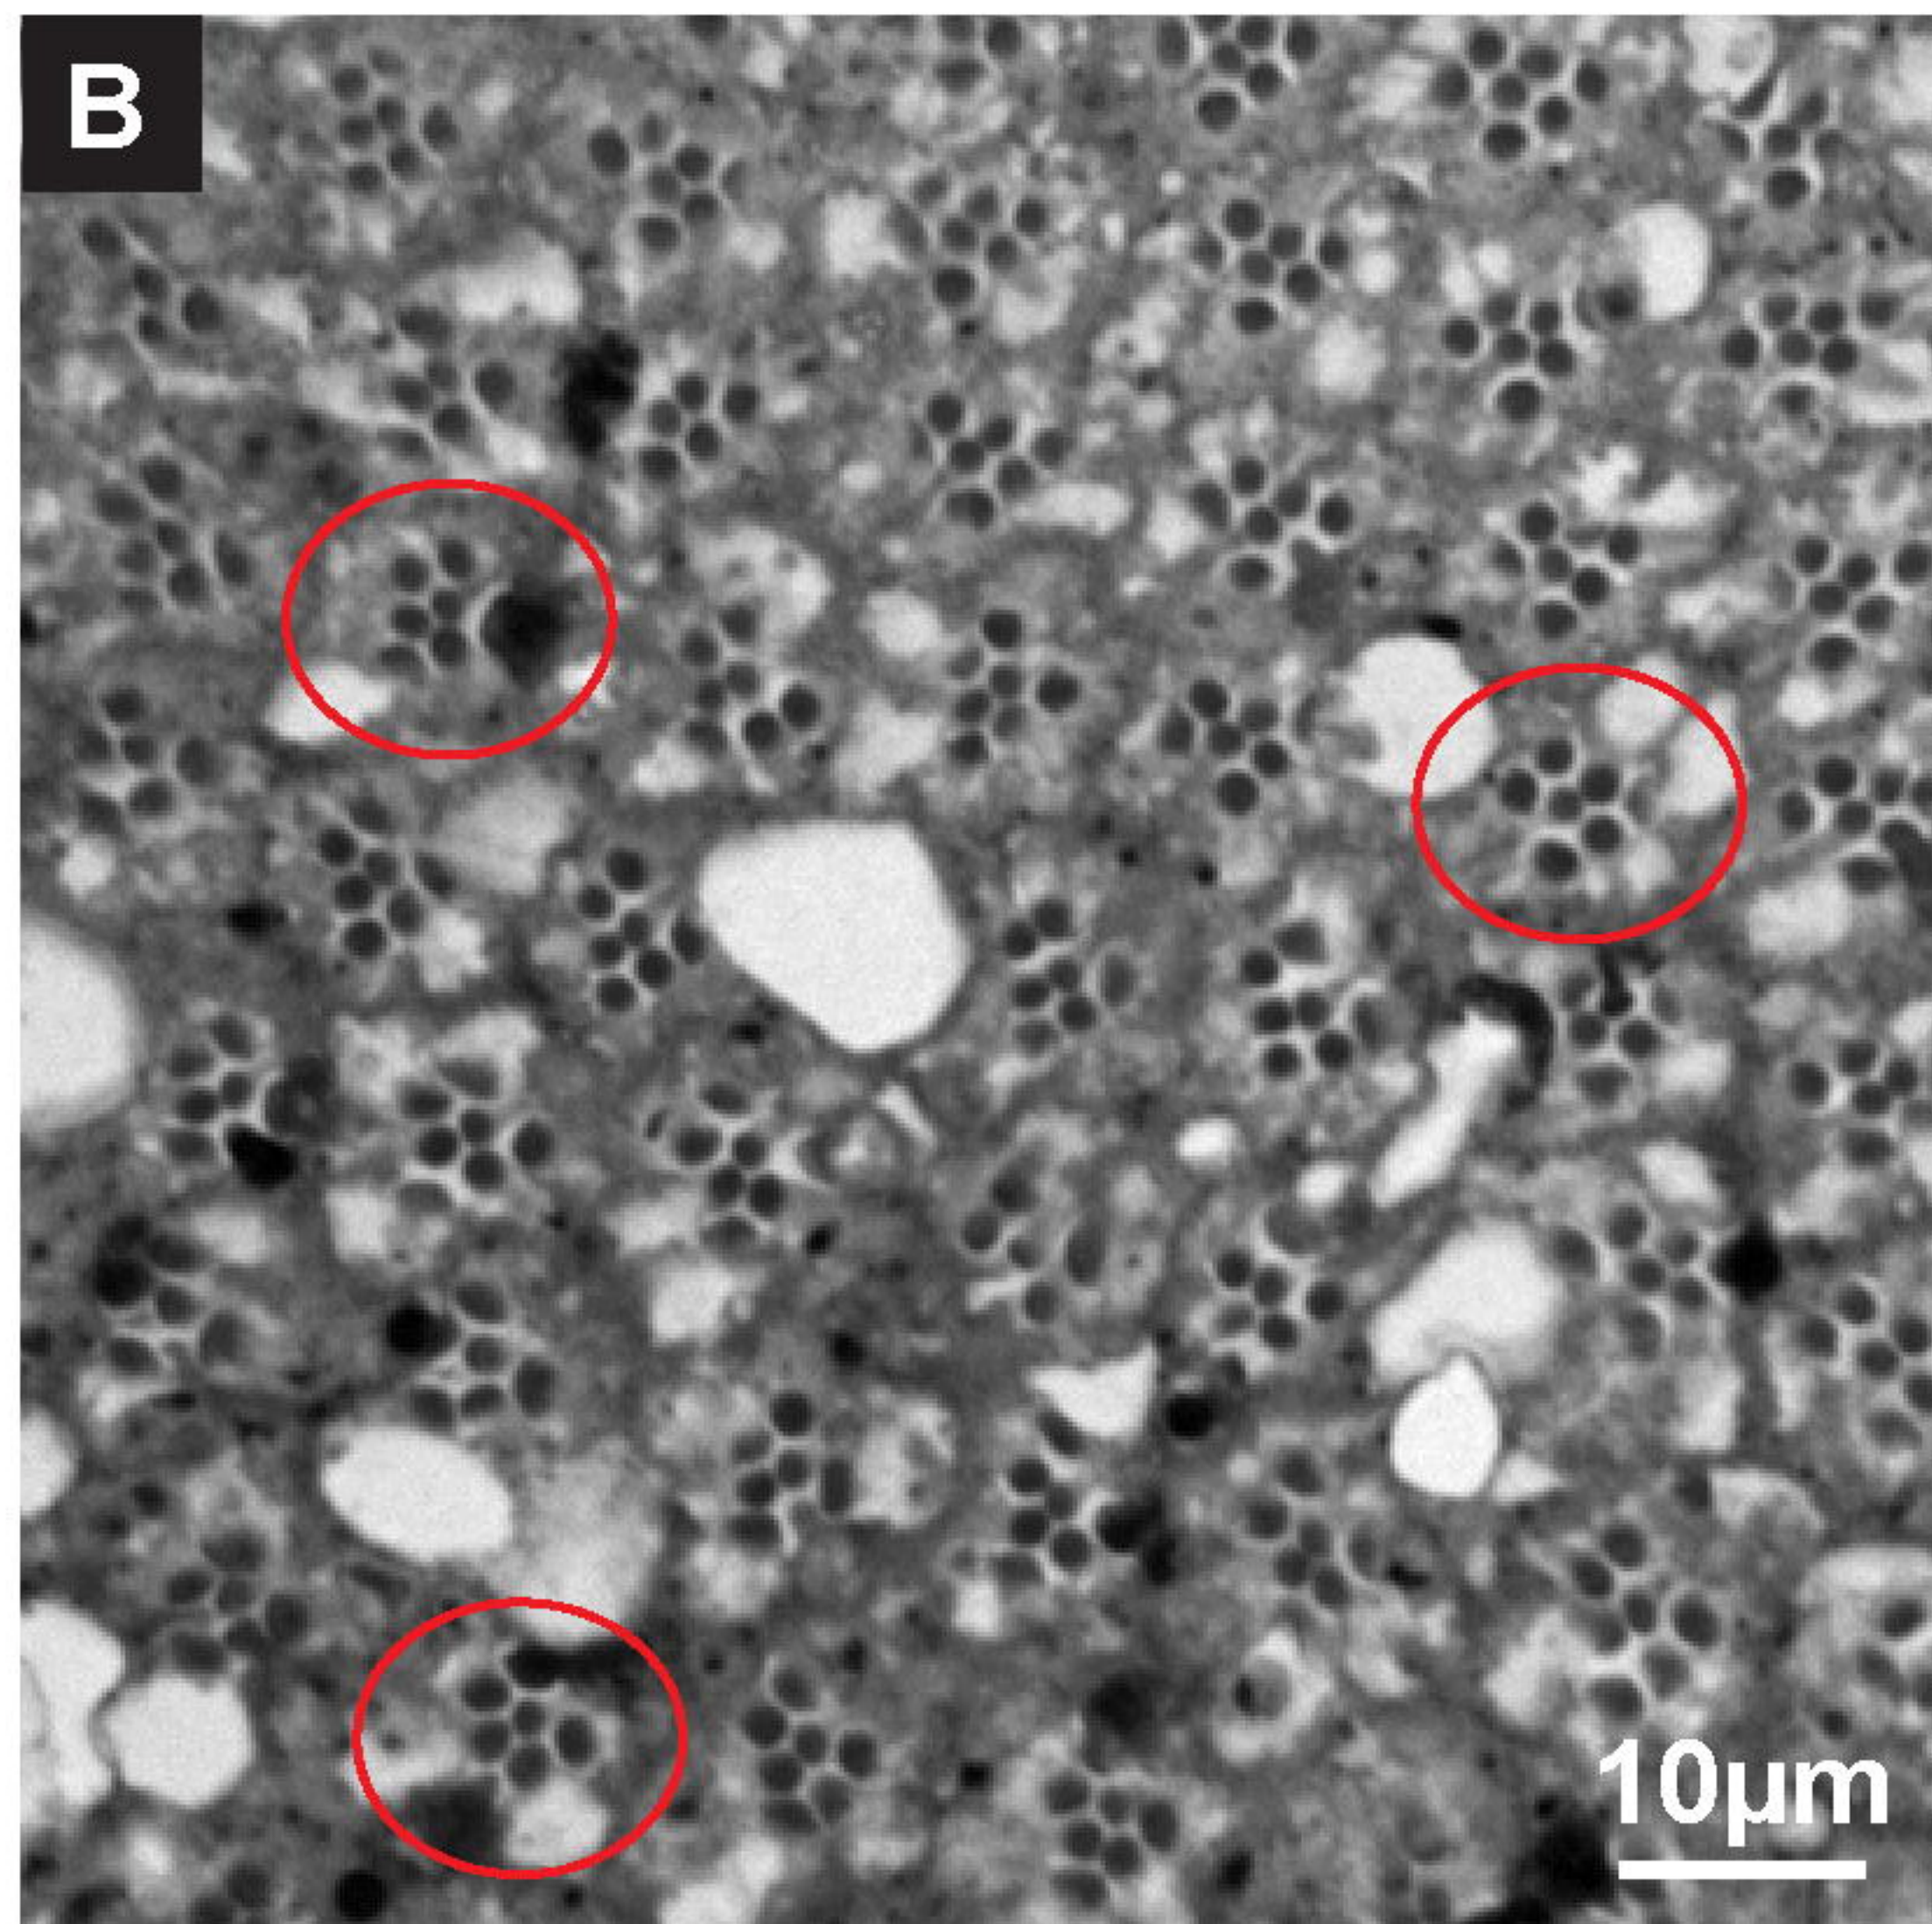

*w\*;;Prp31<sup>P18</sup>, st<sup>1</sup>/+*

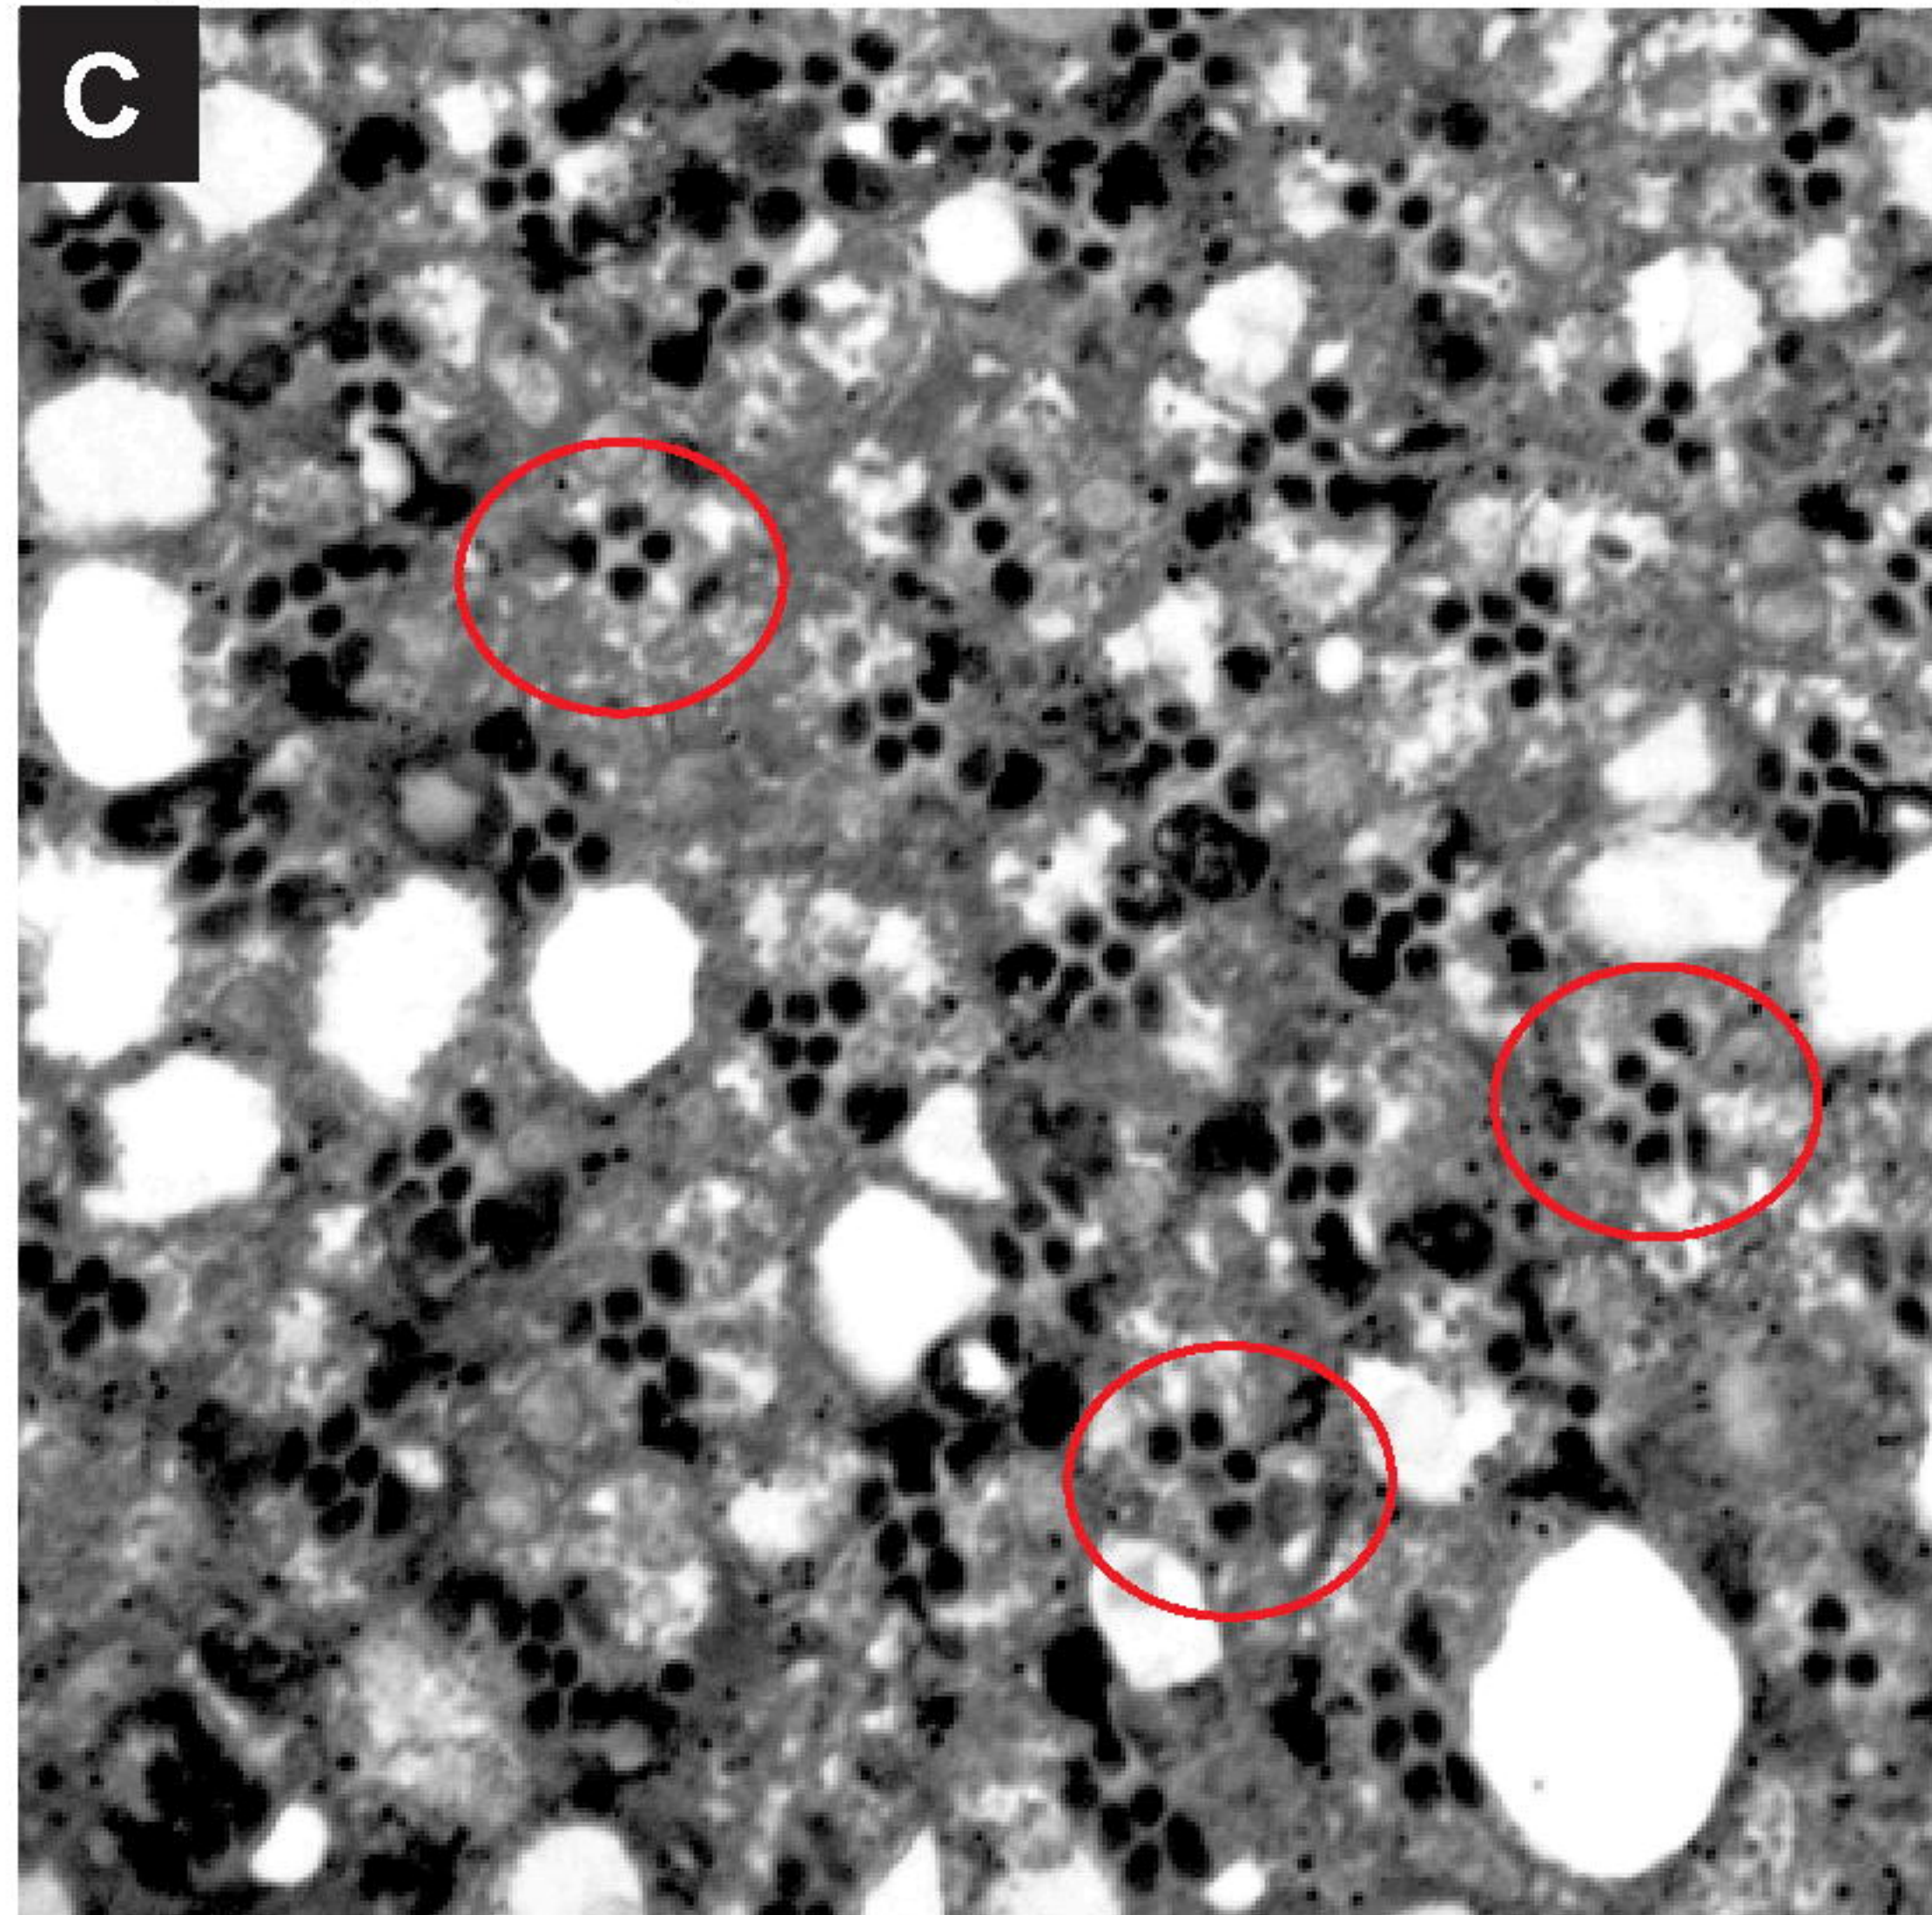

*w\*;;Prp31<sup>P17</sup>, st<sup>1</sup>/+*

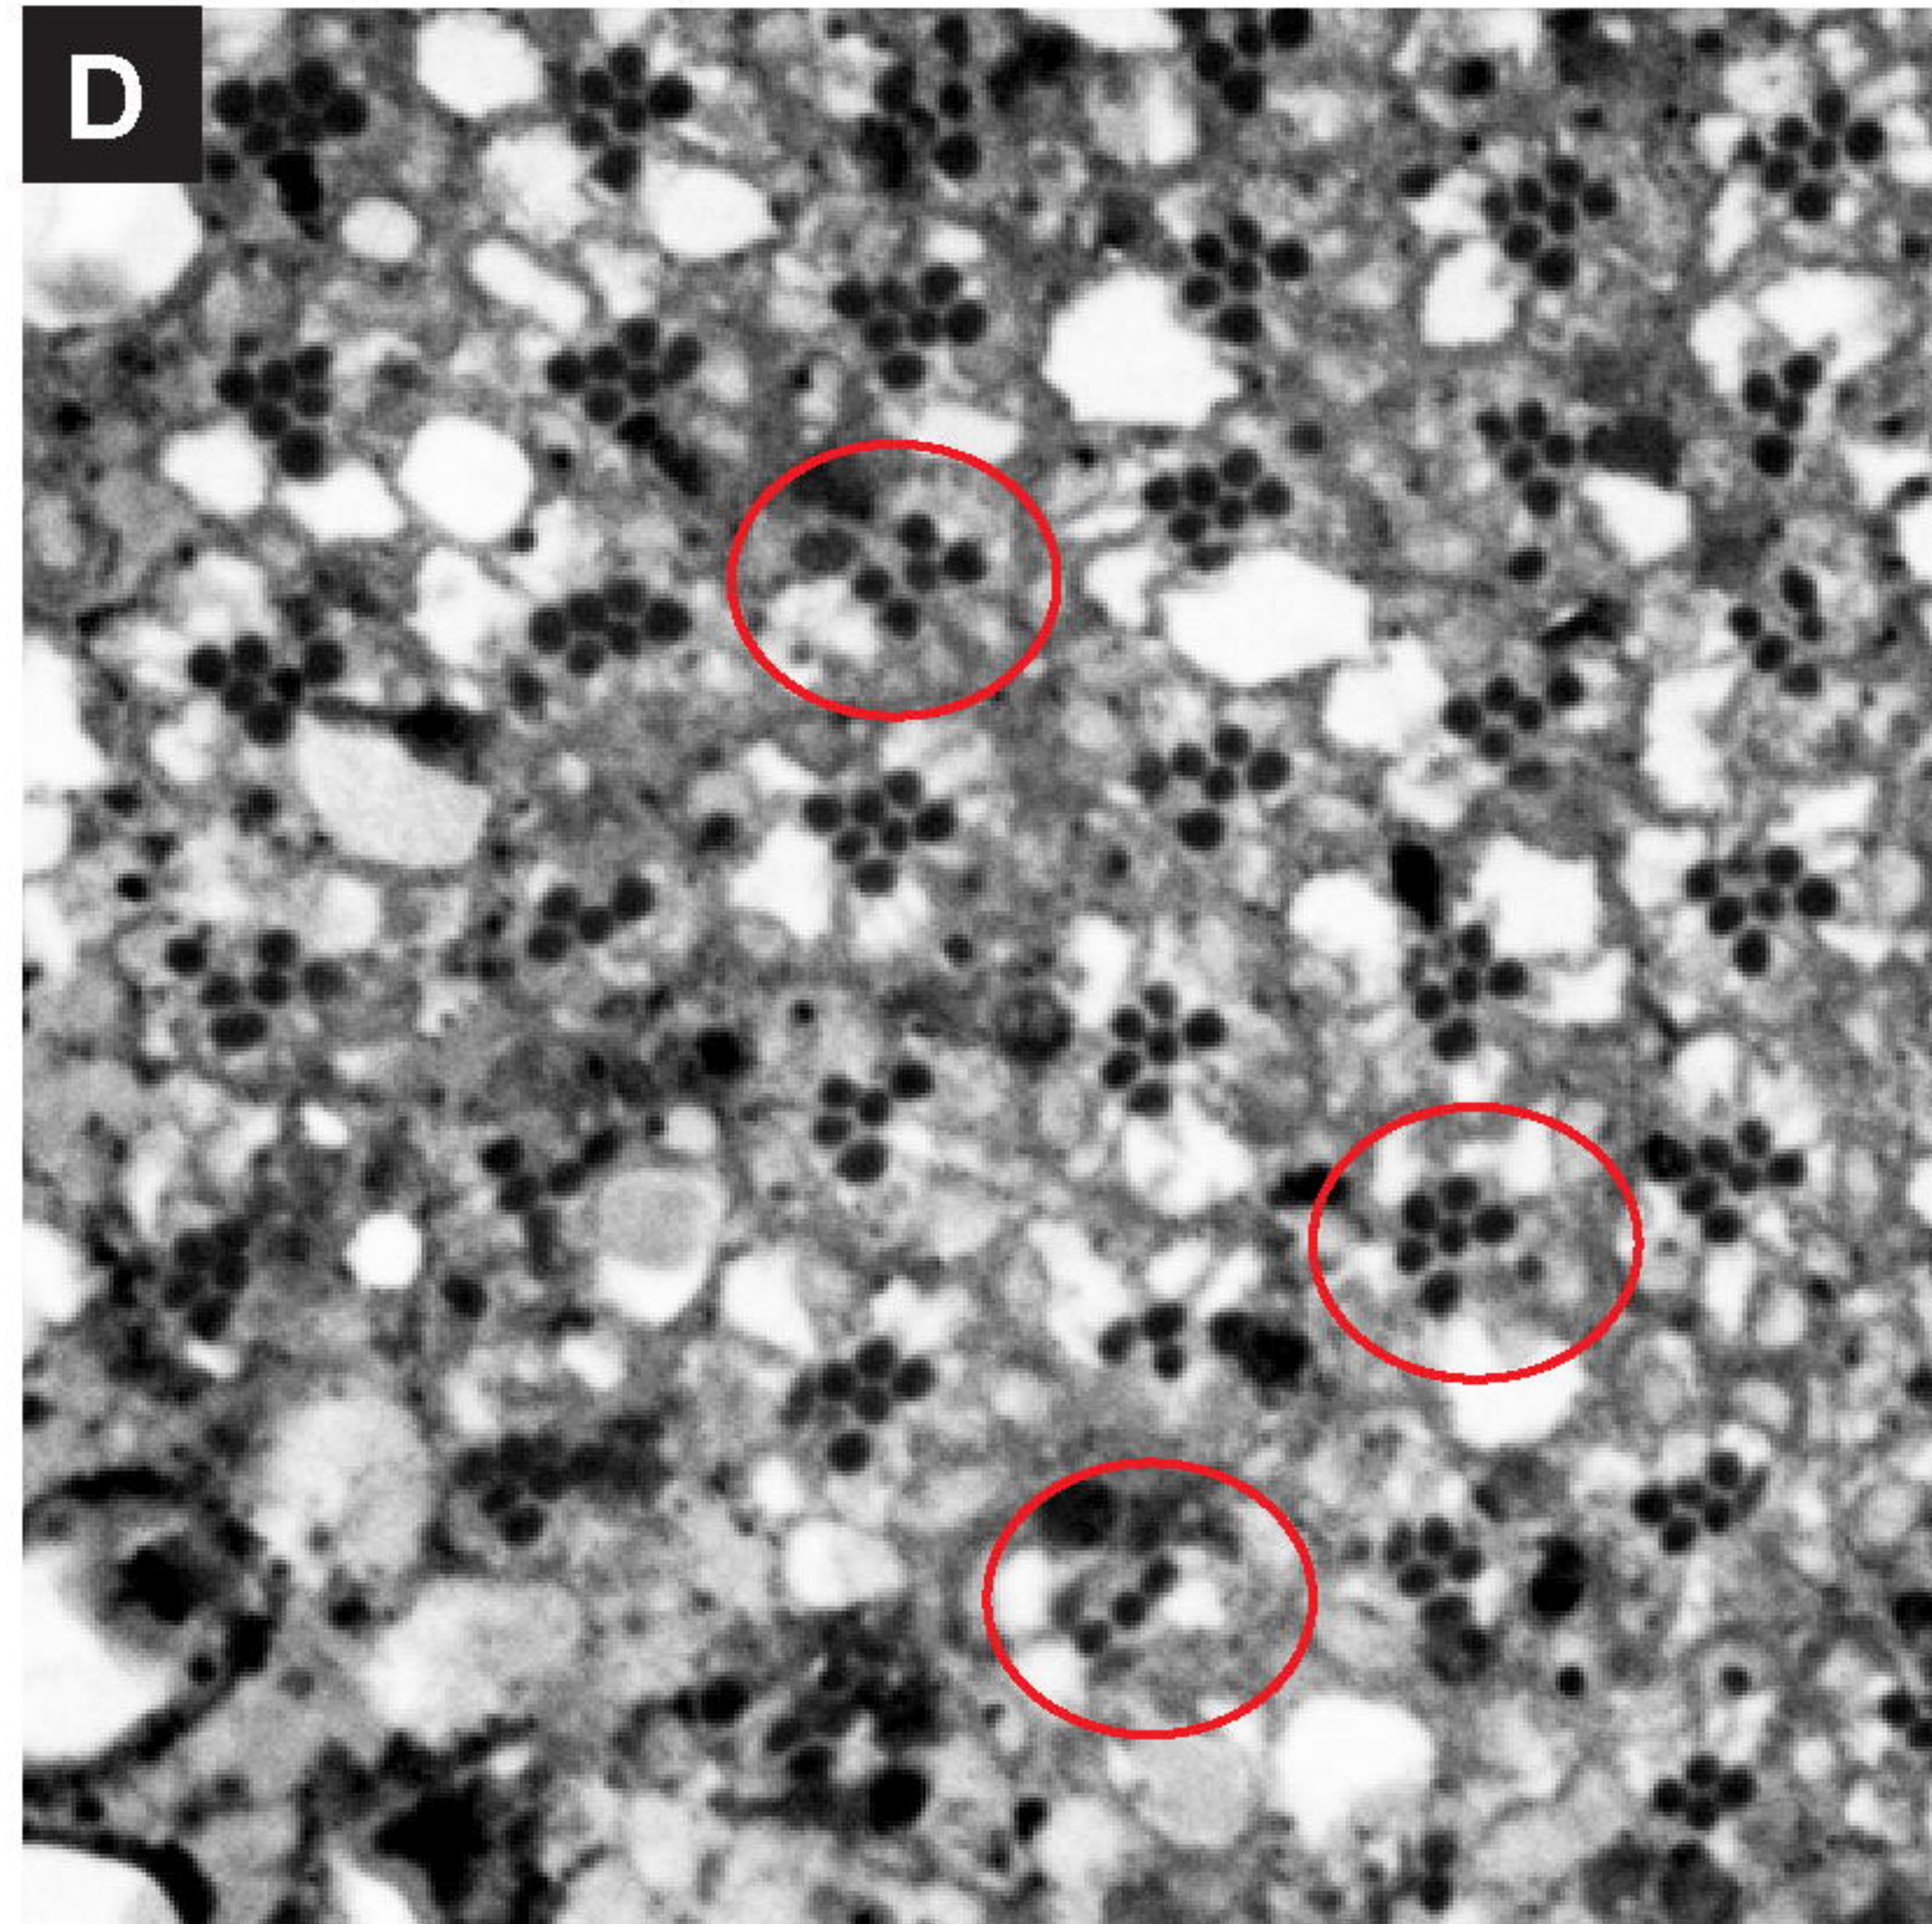

**E**

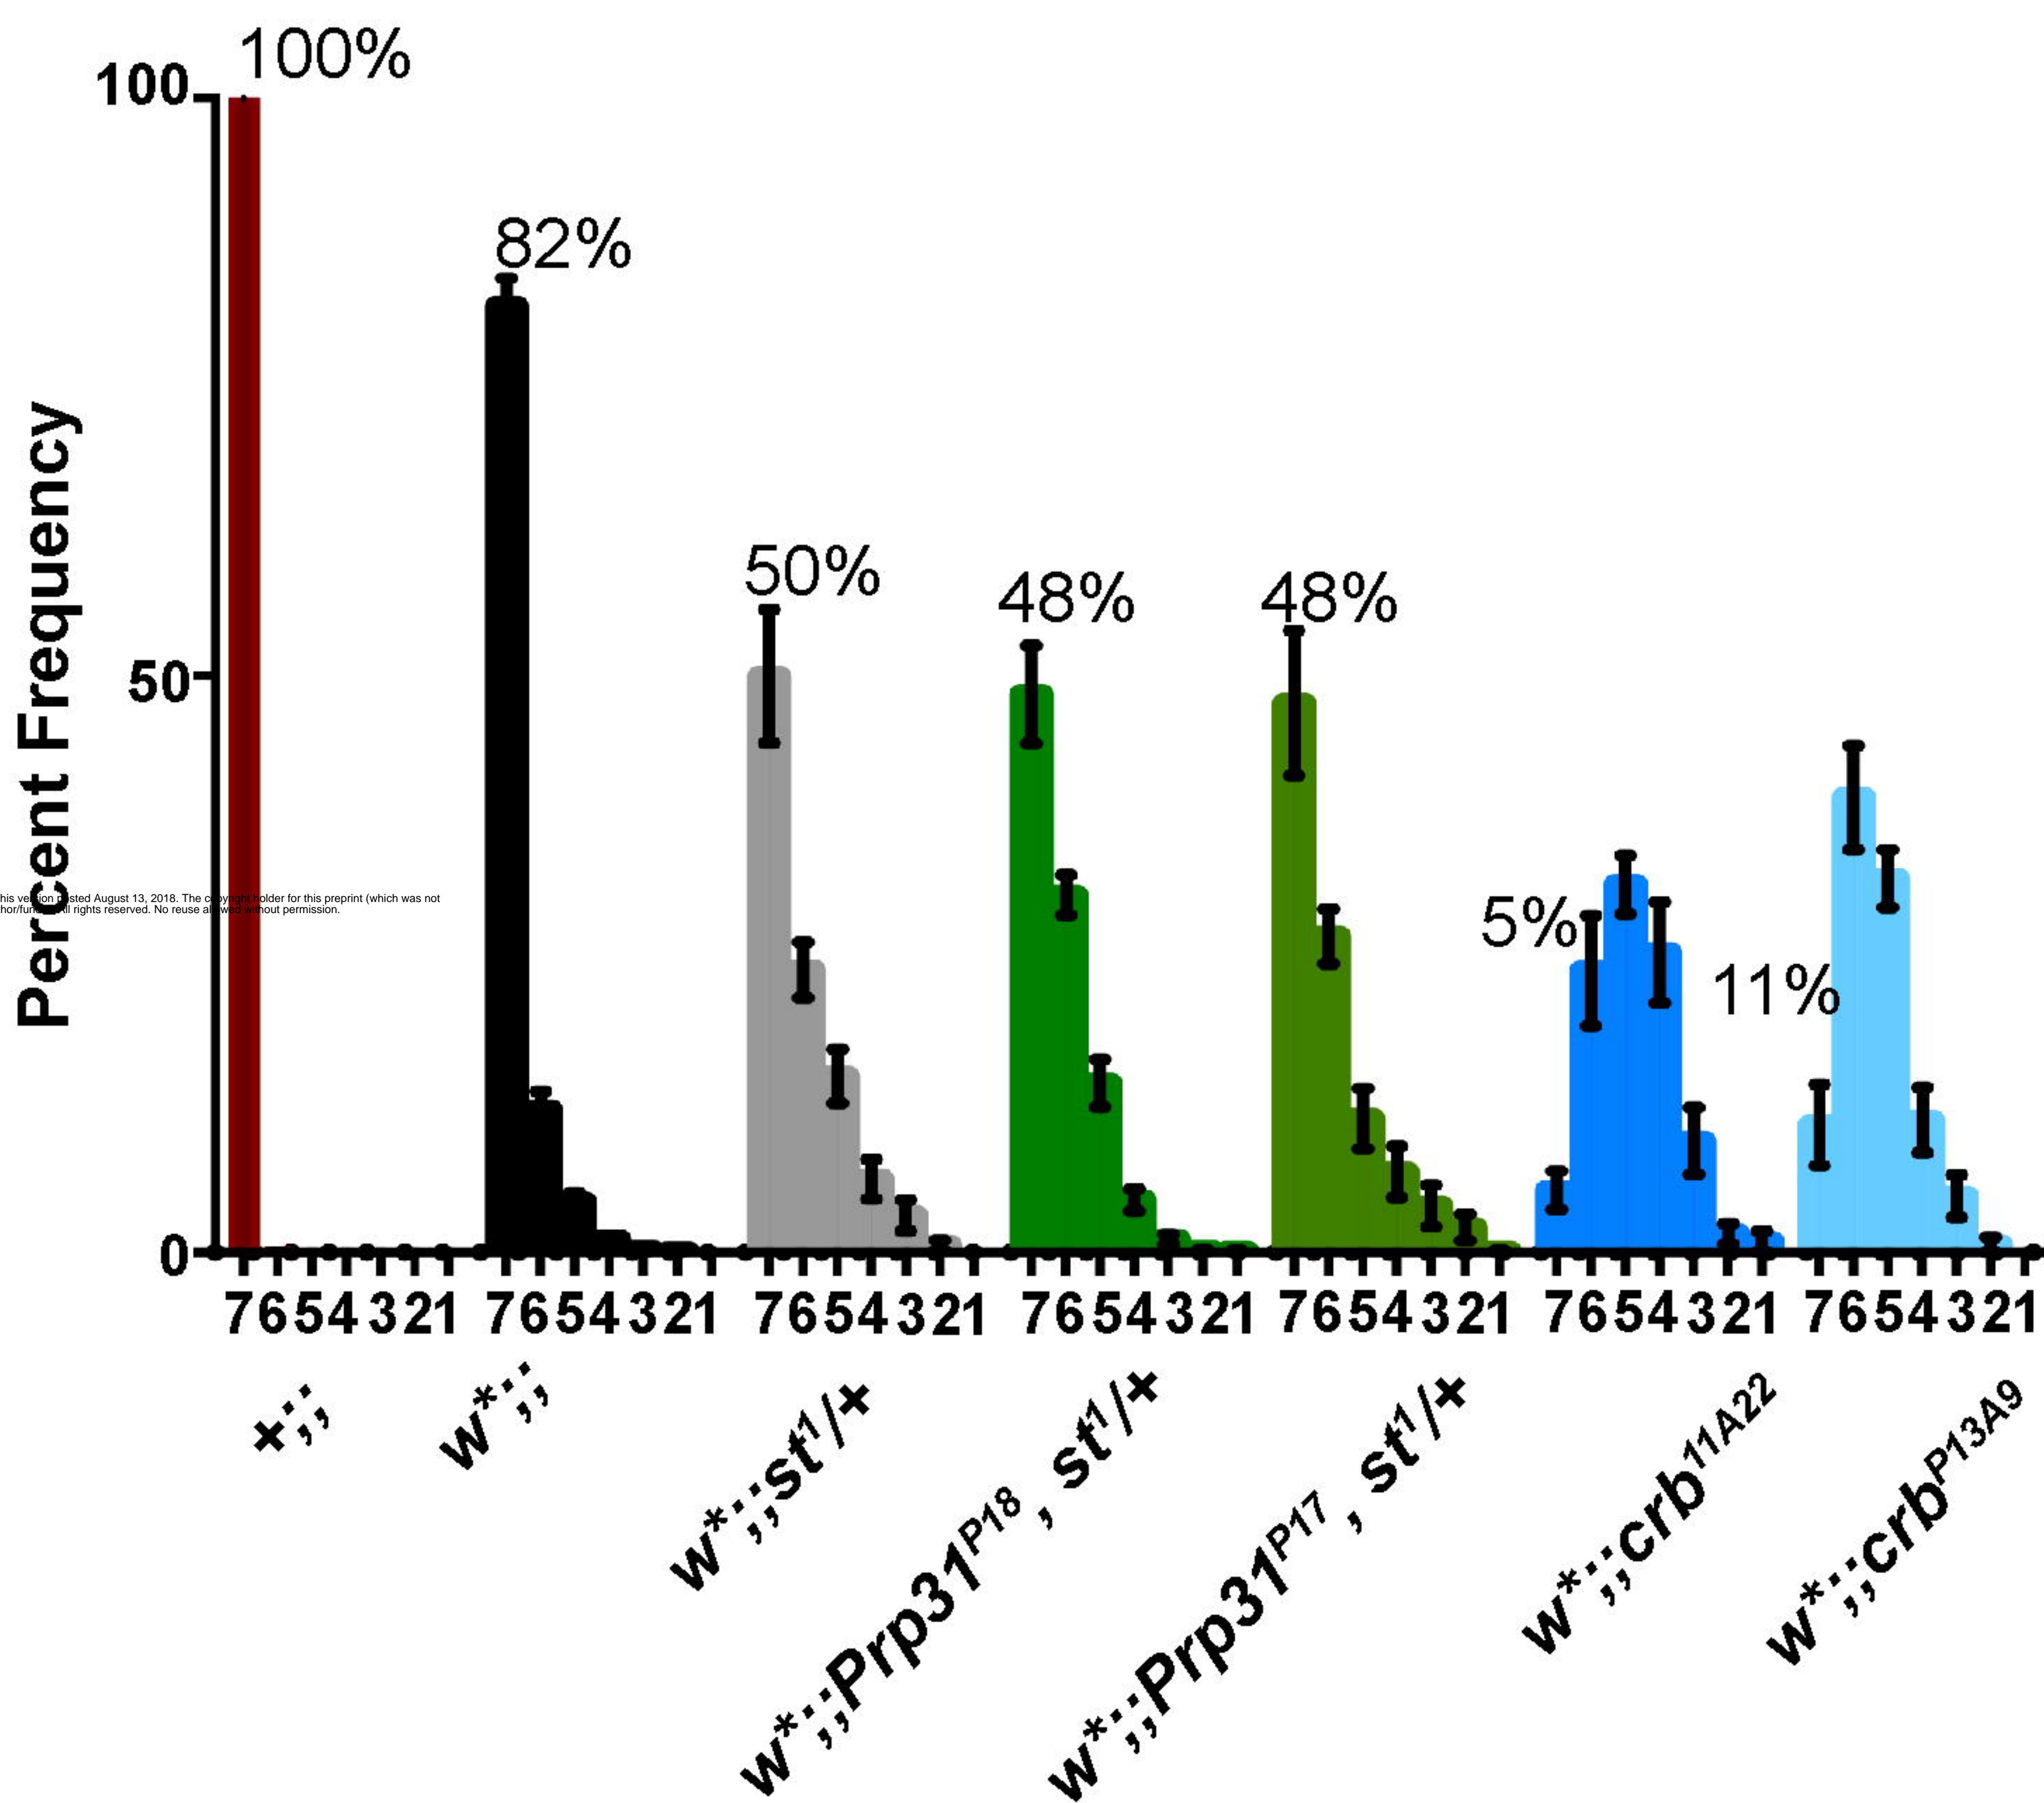

bioRxiv preprint doi: <https://doi.org/10.1101/388433>; this version posted August 13, 2018. The copyright holder for this preprint (which was not certified by peer review) is the author/funder. All rights reserved. No reuse allowed without permission.

Figure 2



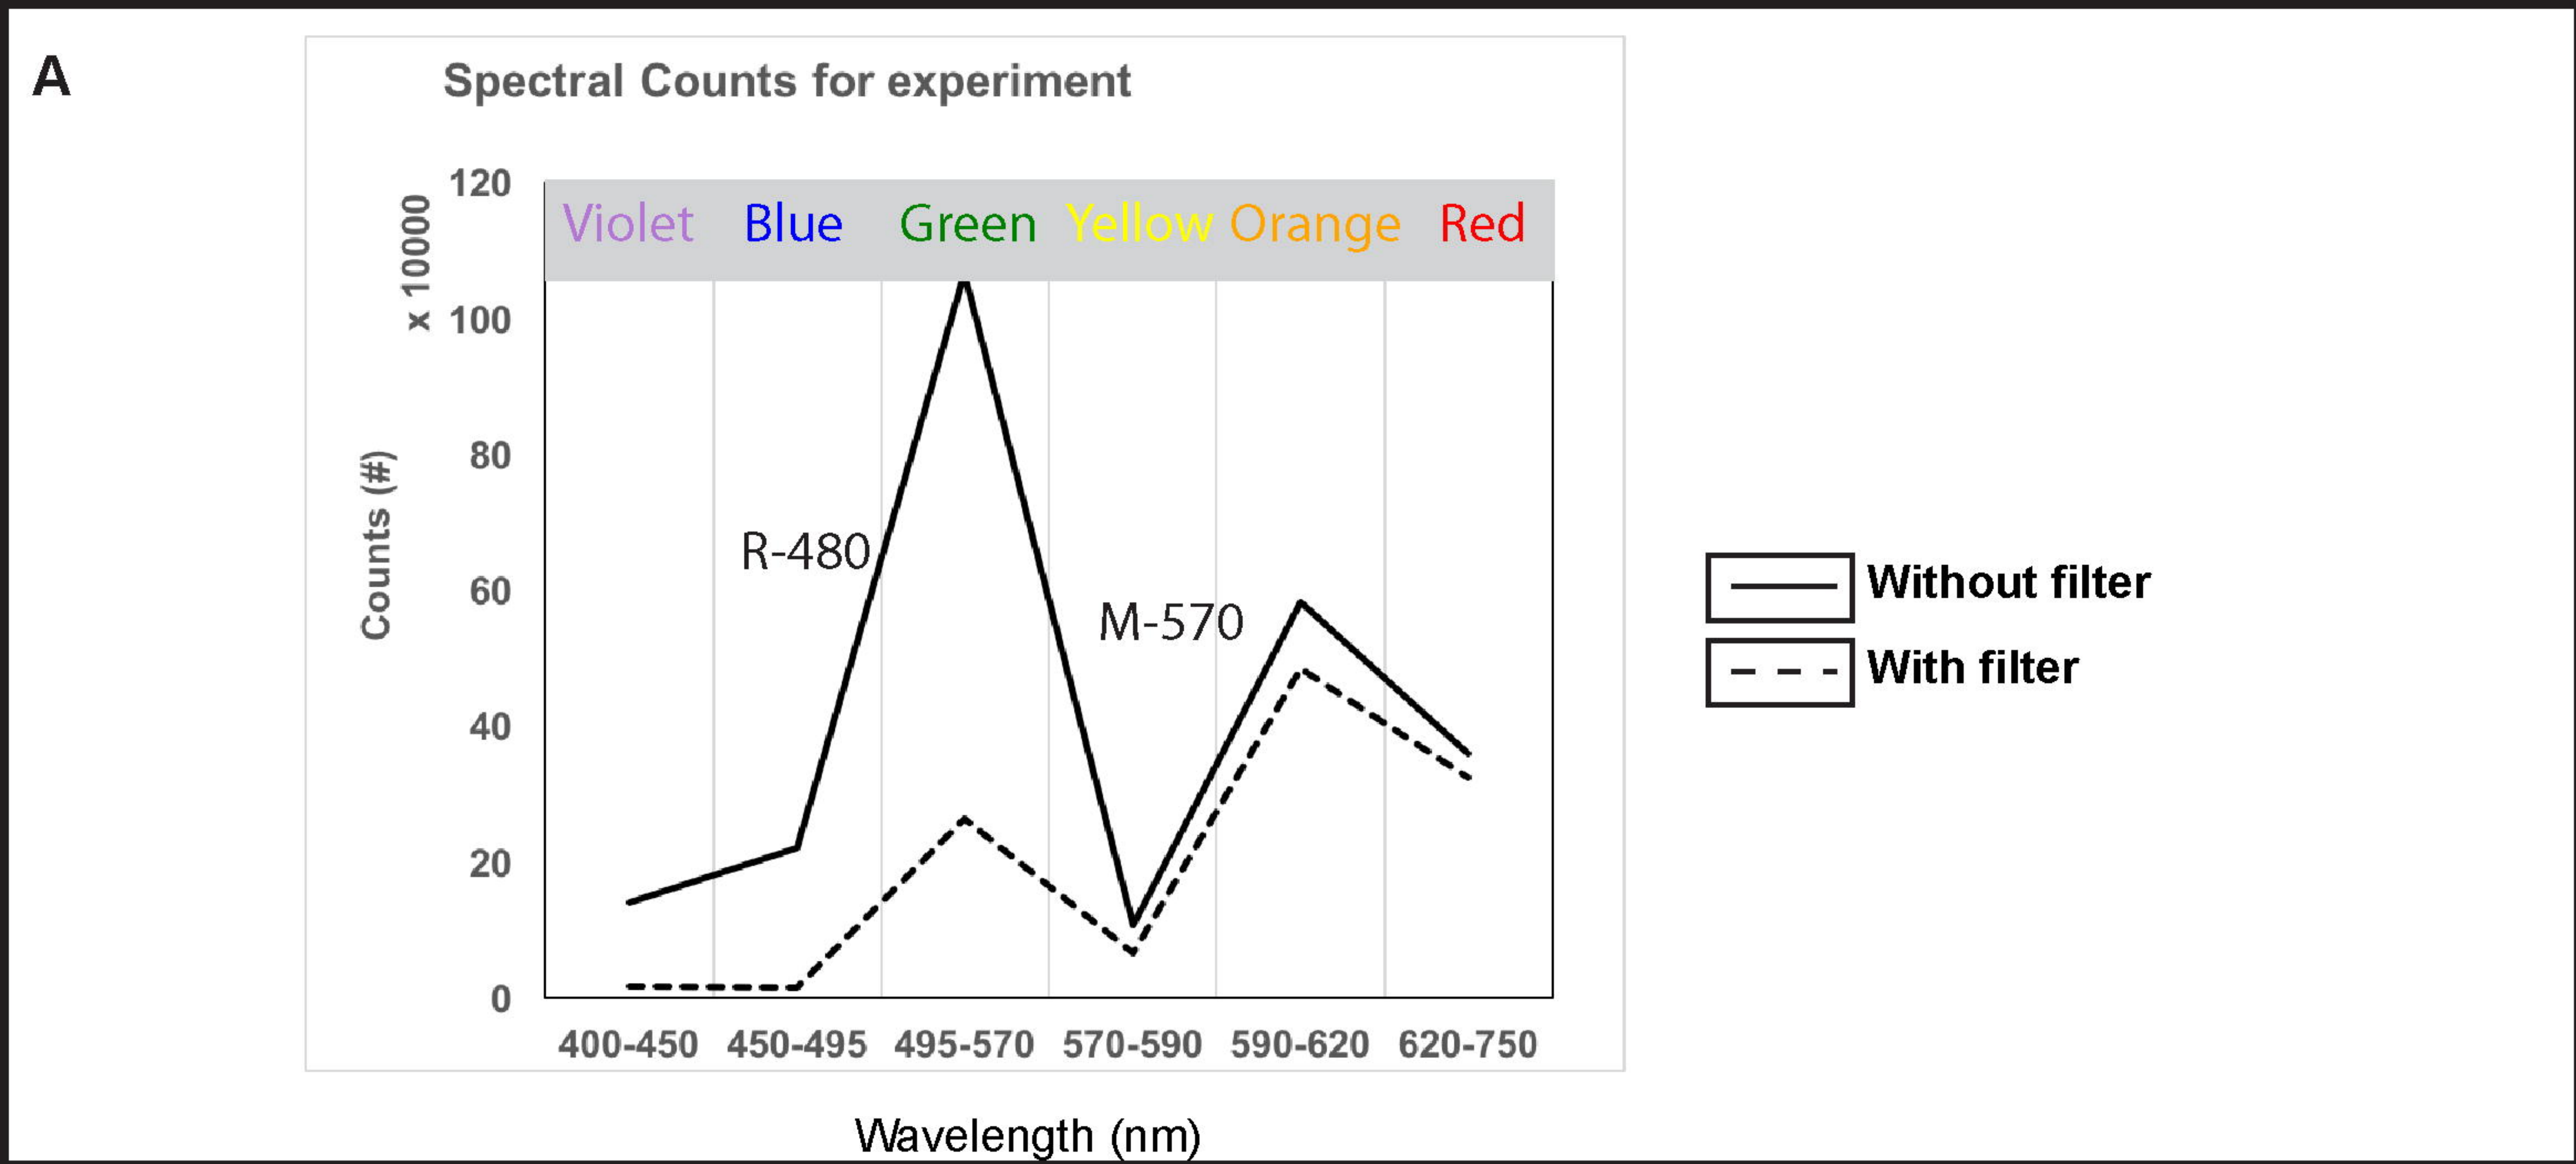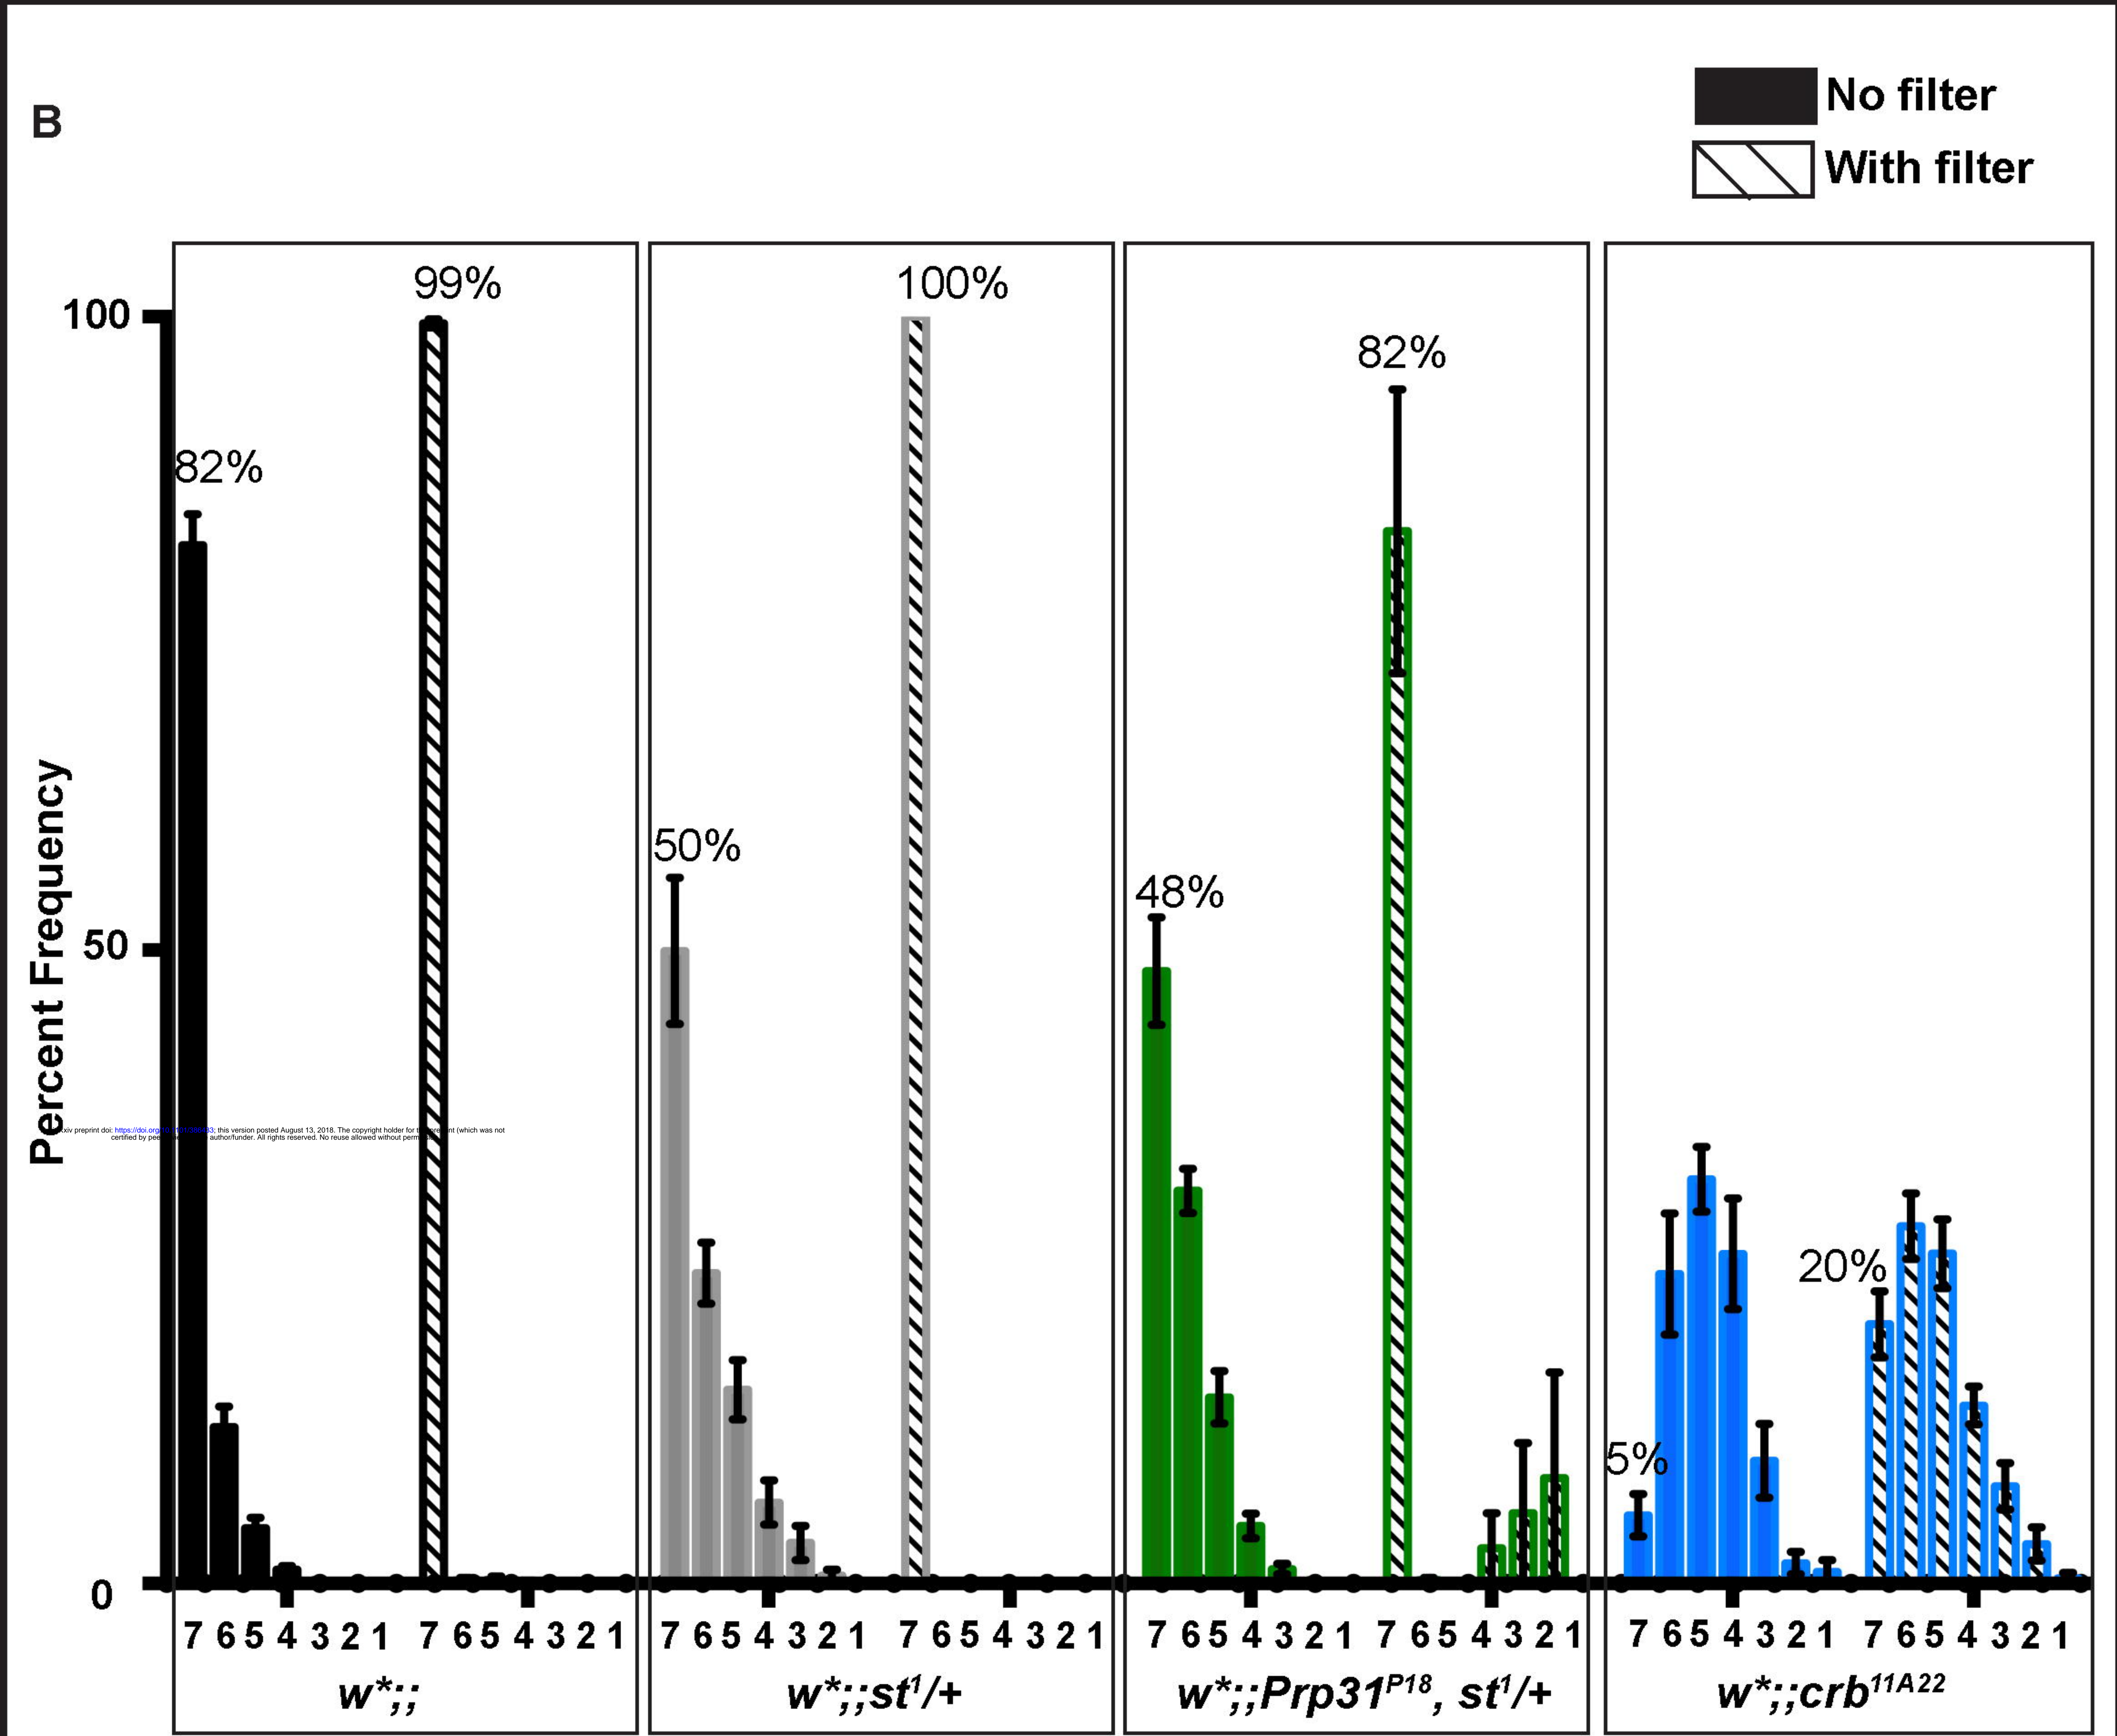

Figure 3



*GMR-w<sup>IR</sup>;Rh1-Gal4>*  
*UASdicer*

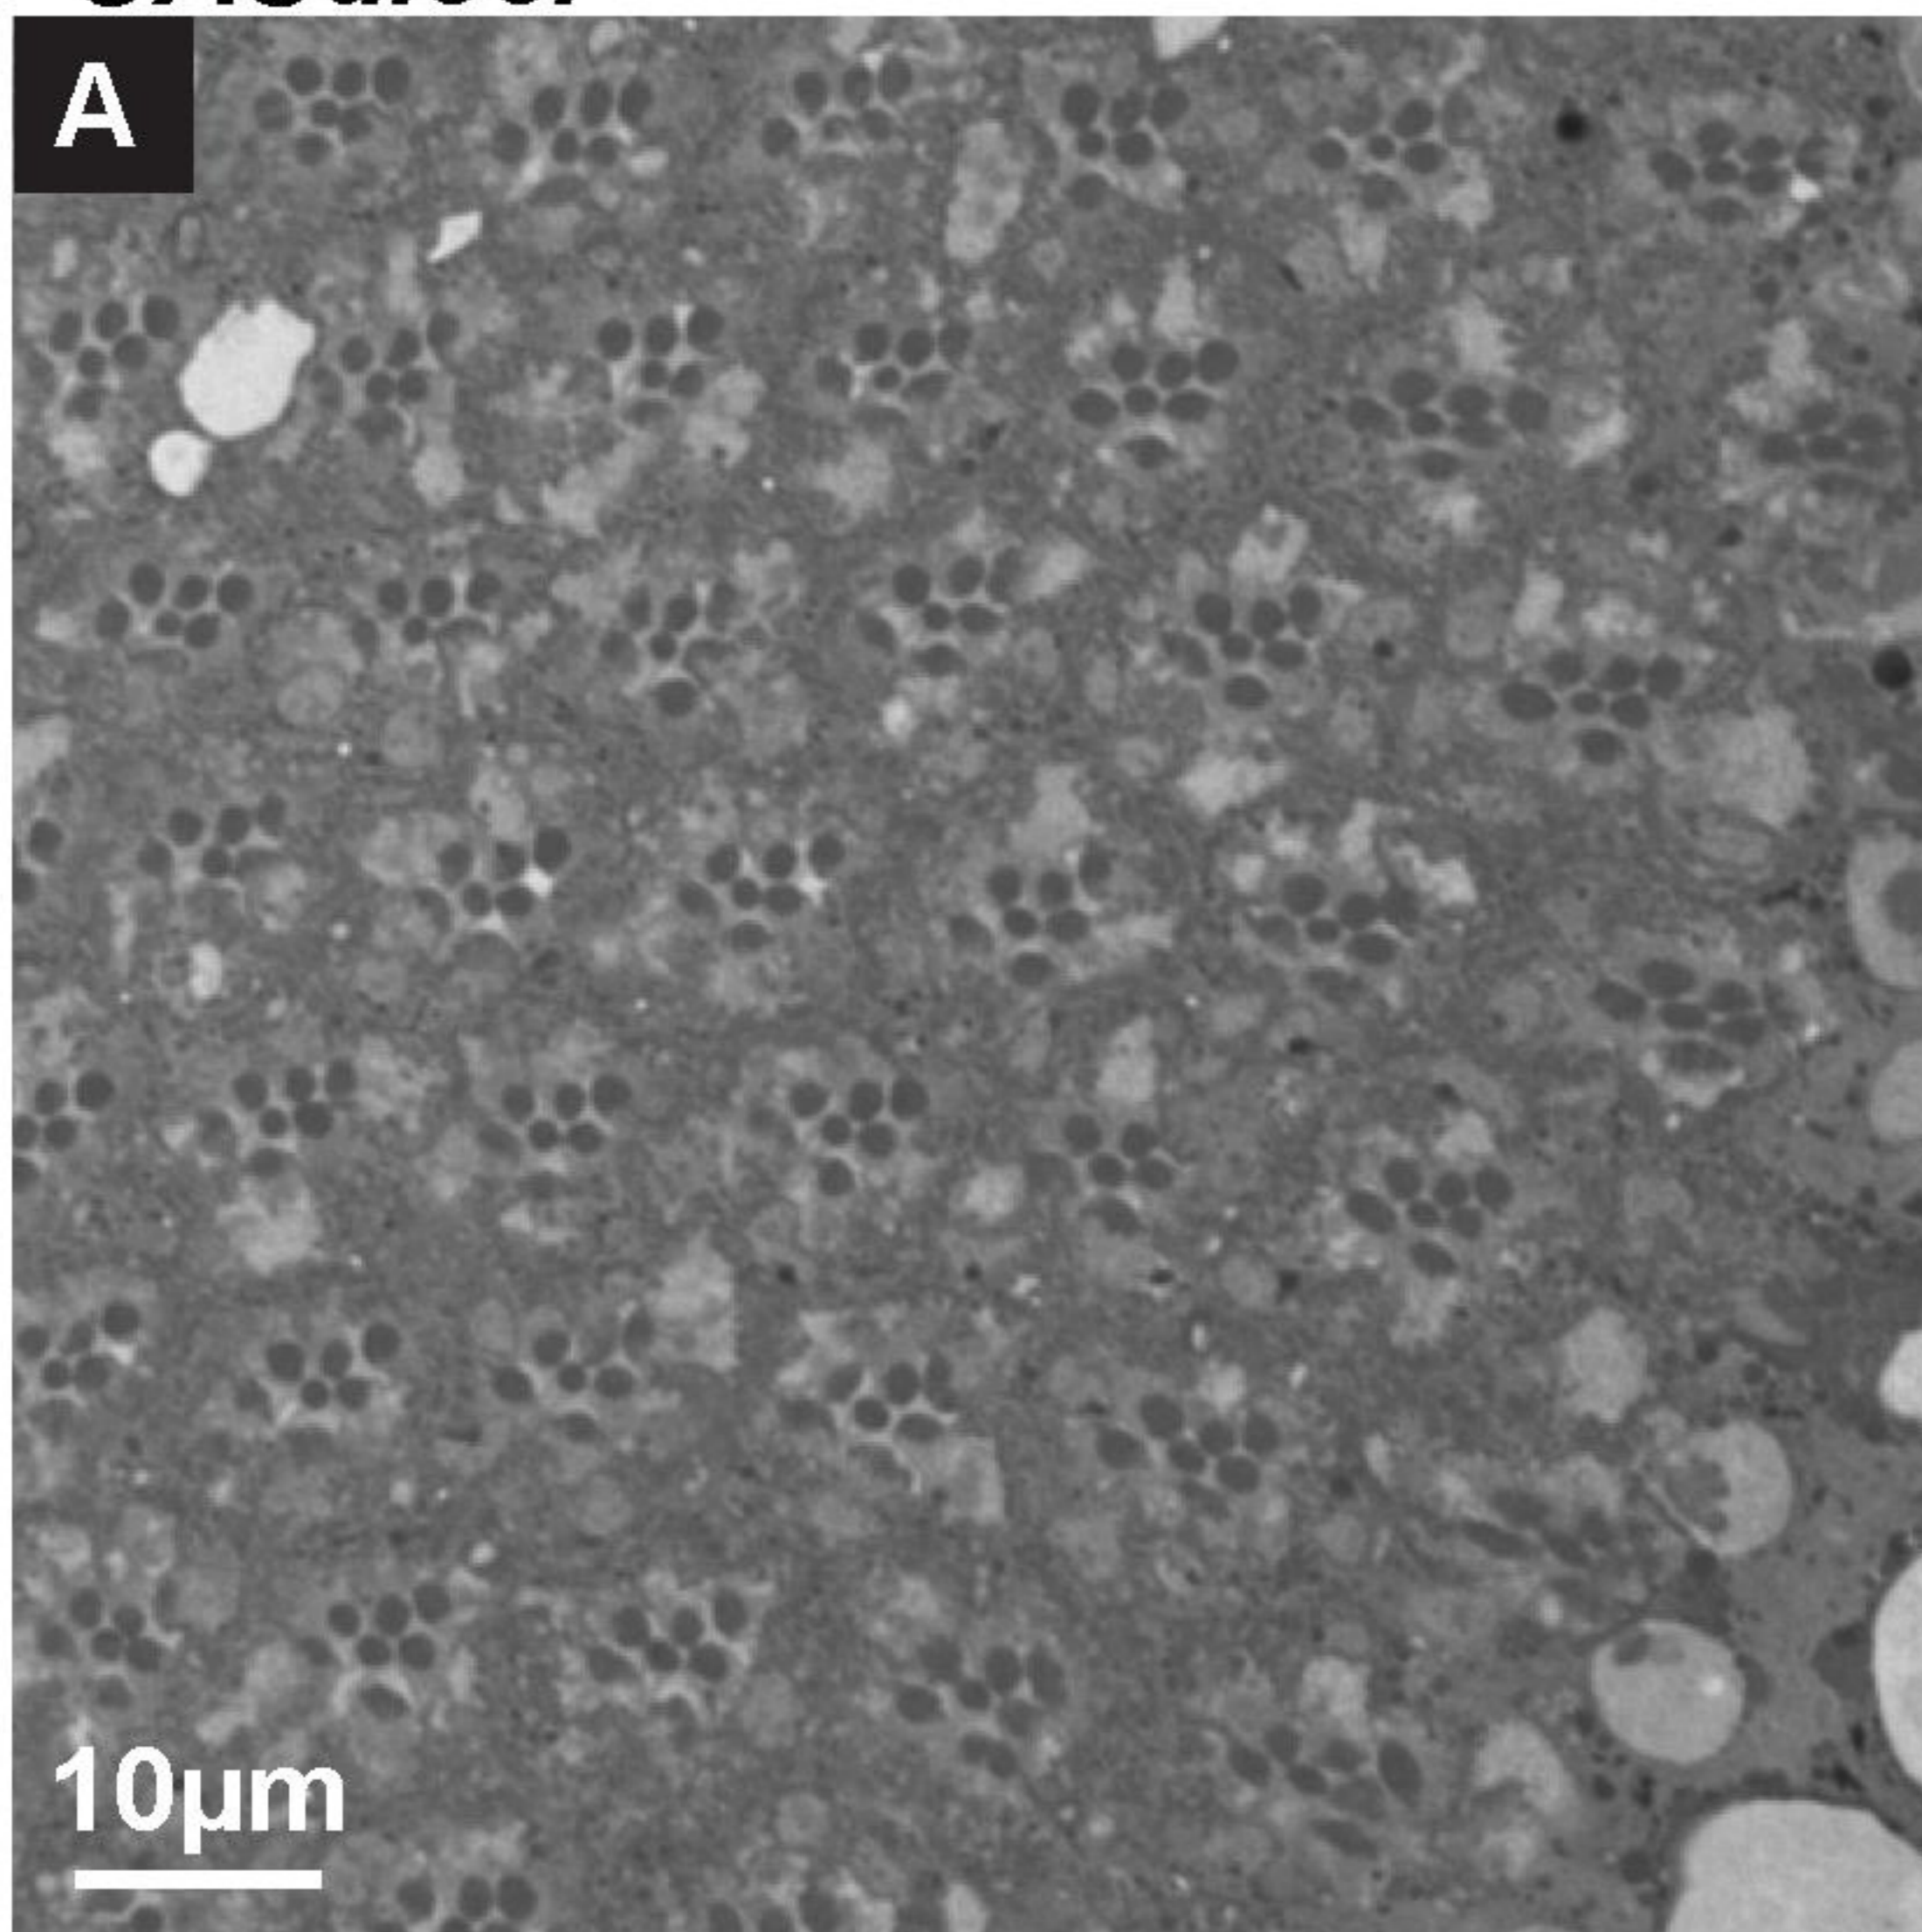

*GMR-w<sup>IR</sup>;Rh1-Gal4>*  
*UASdicer + UASPrp31RNAi*

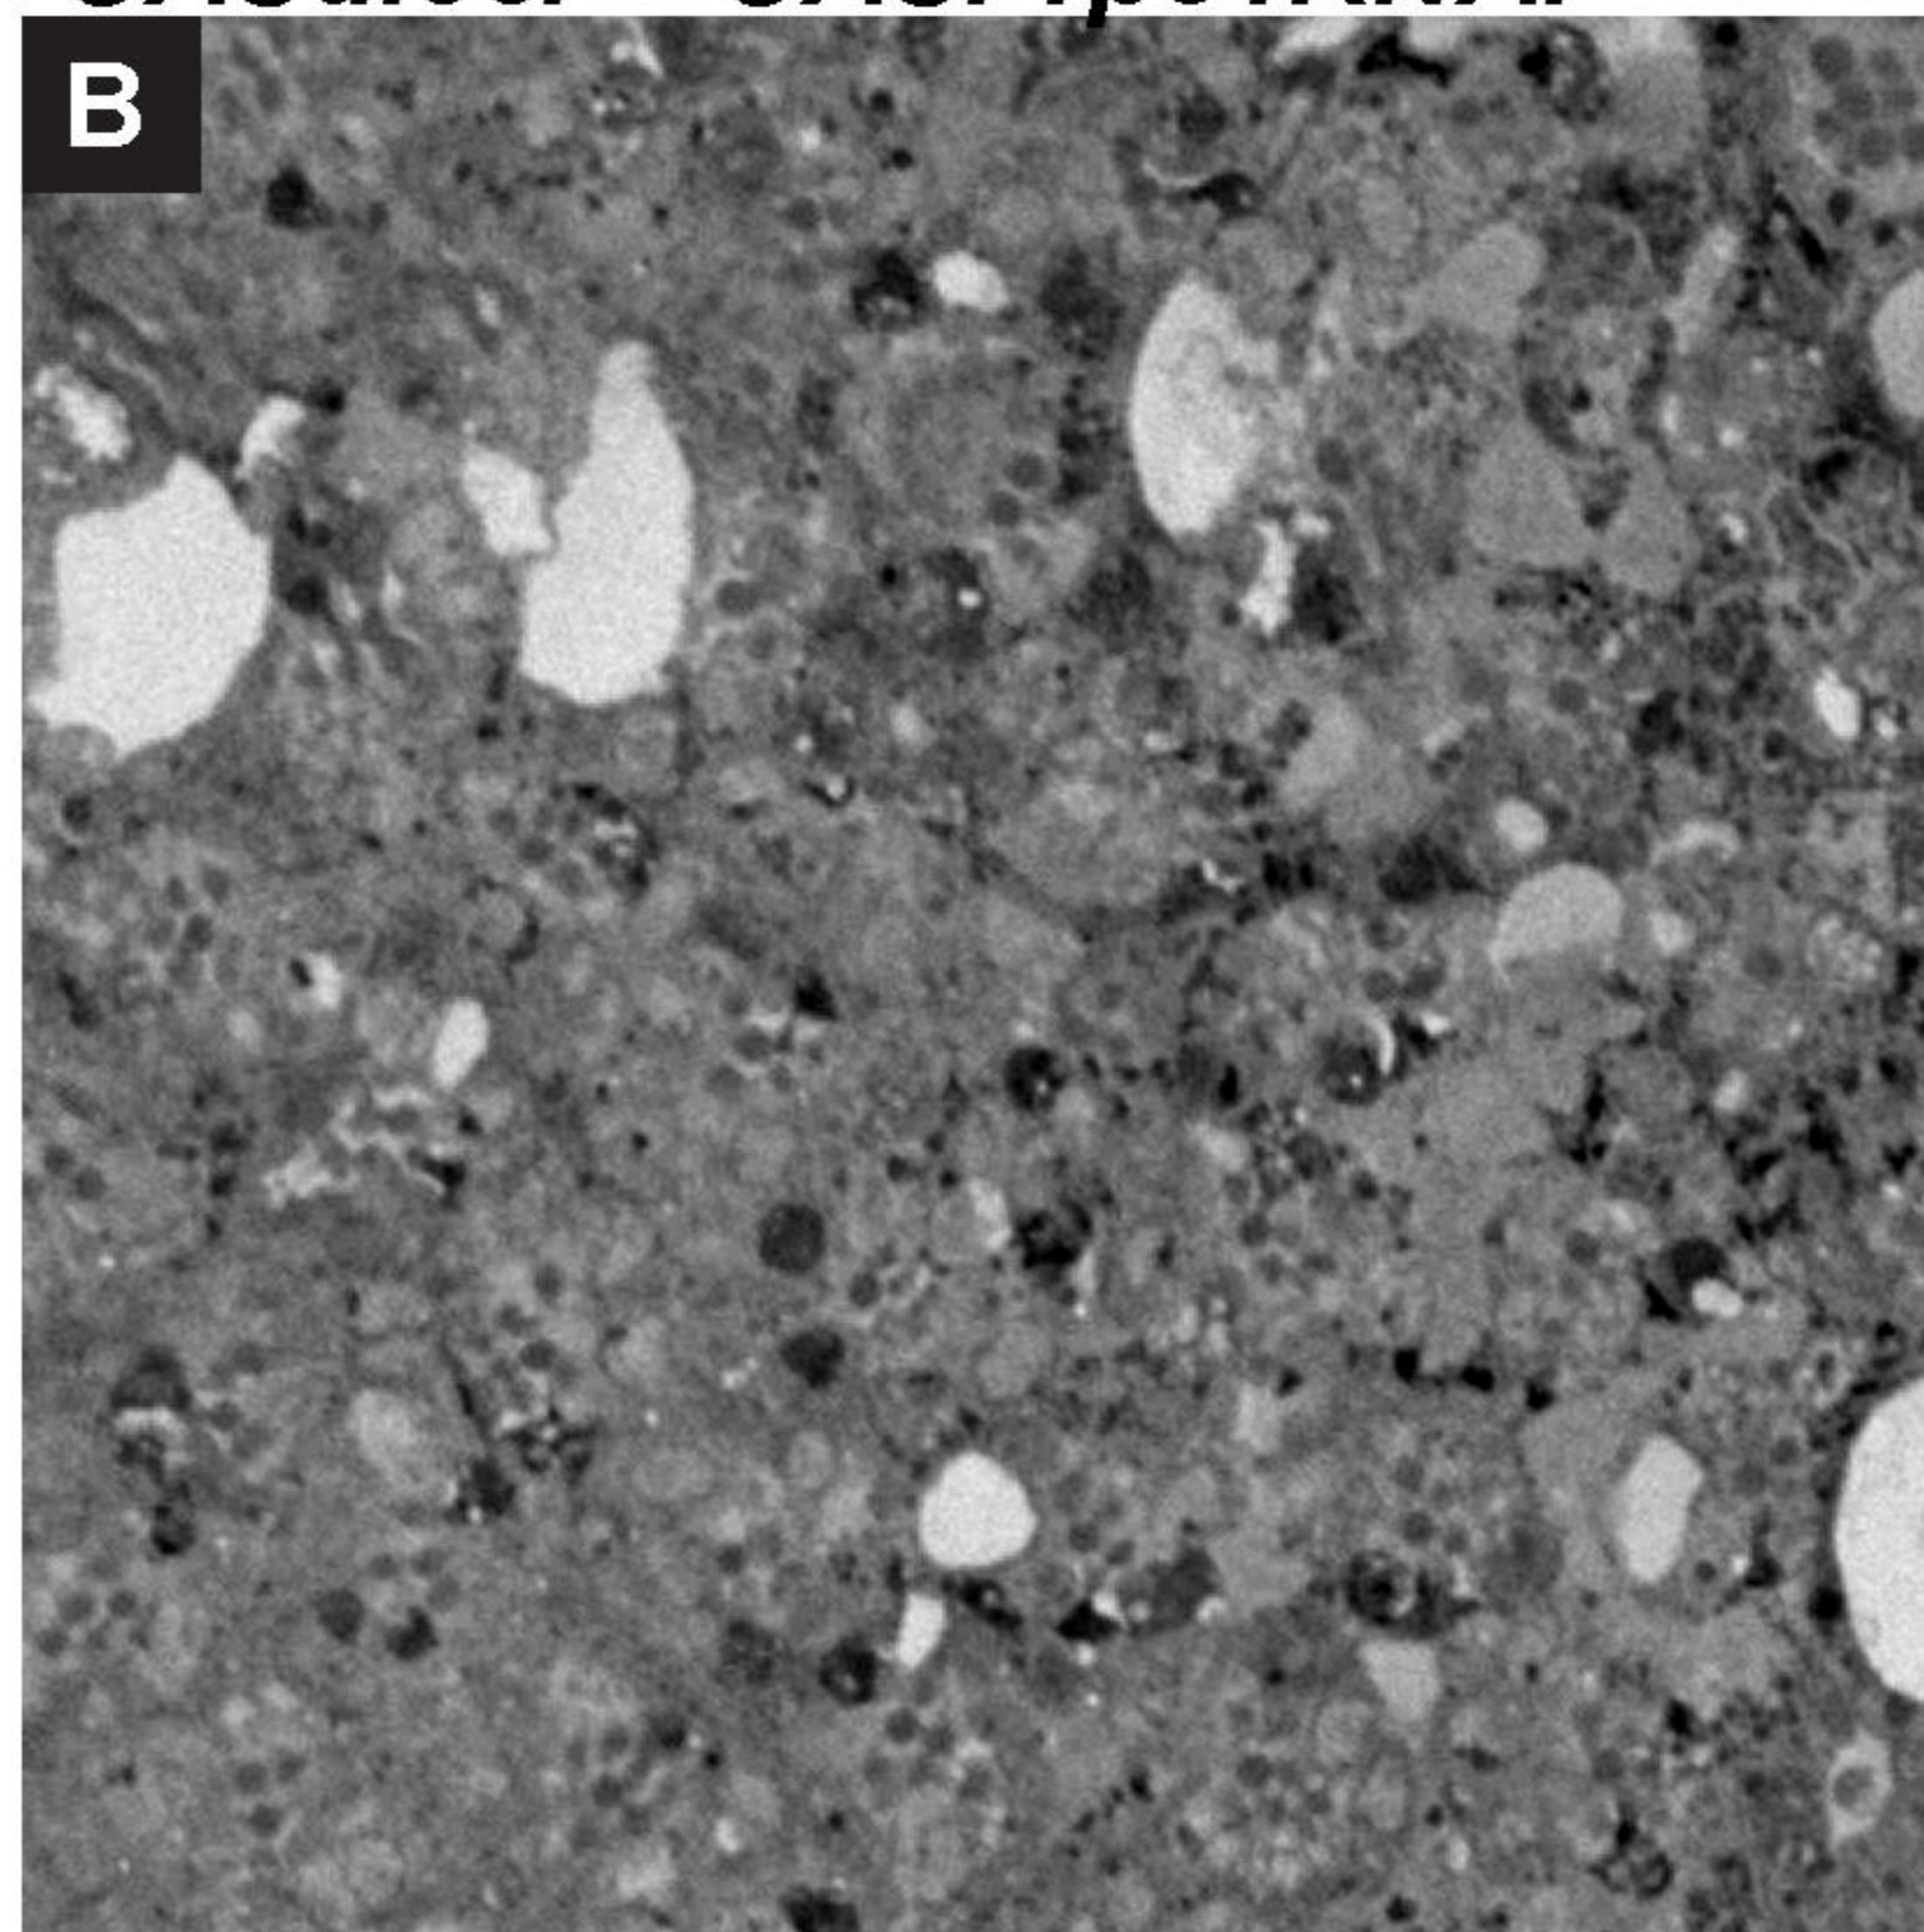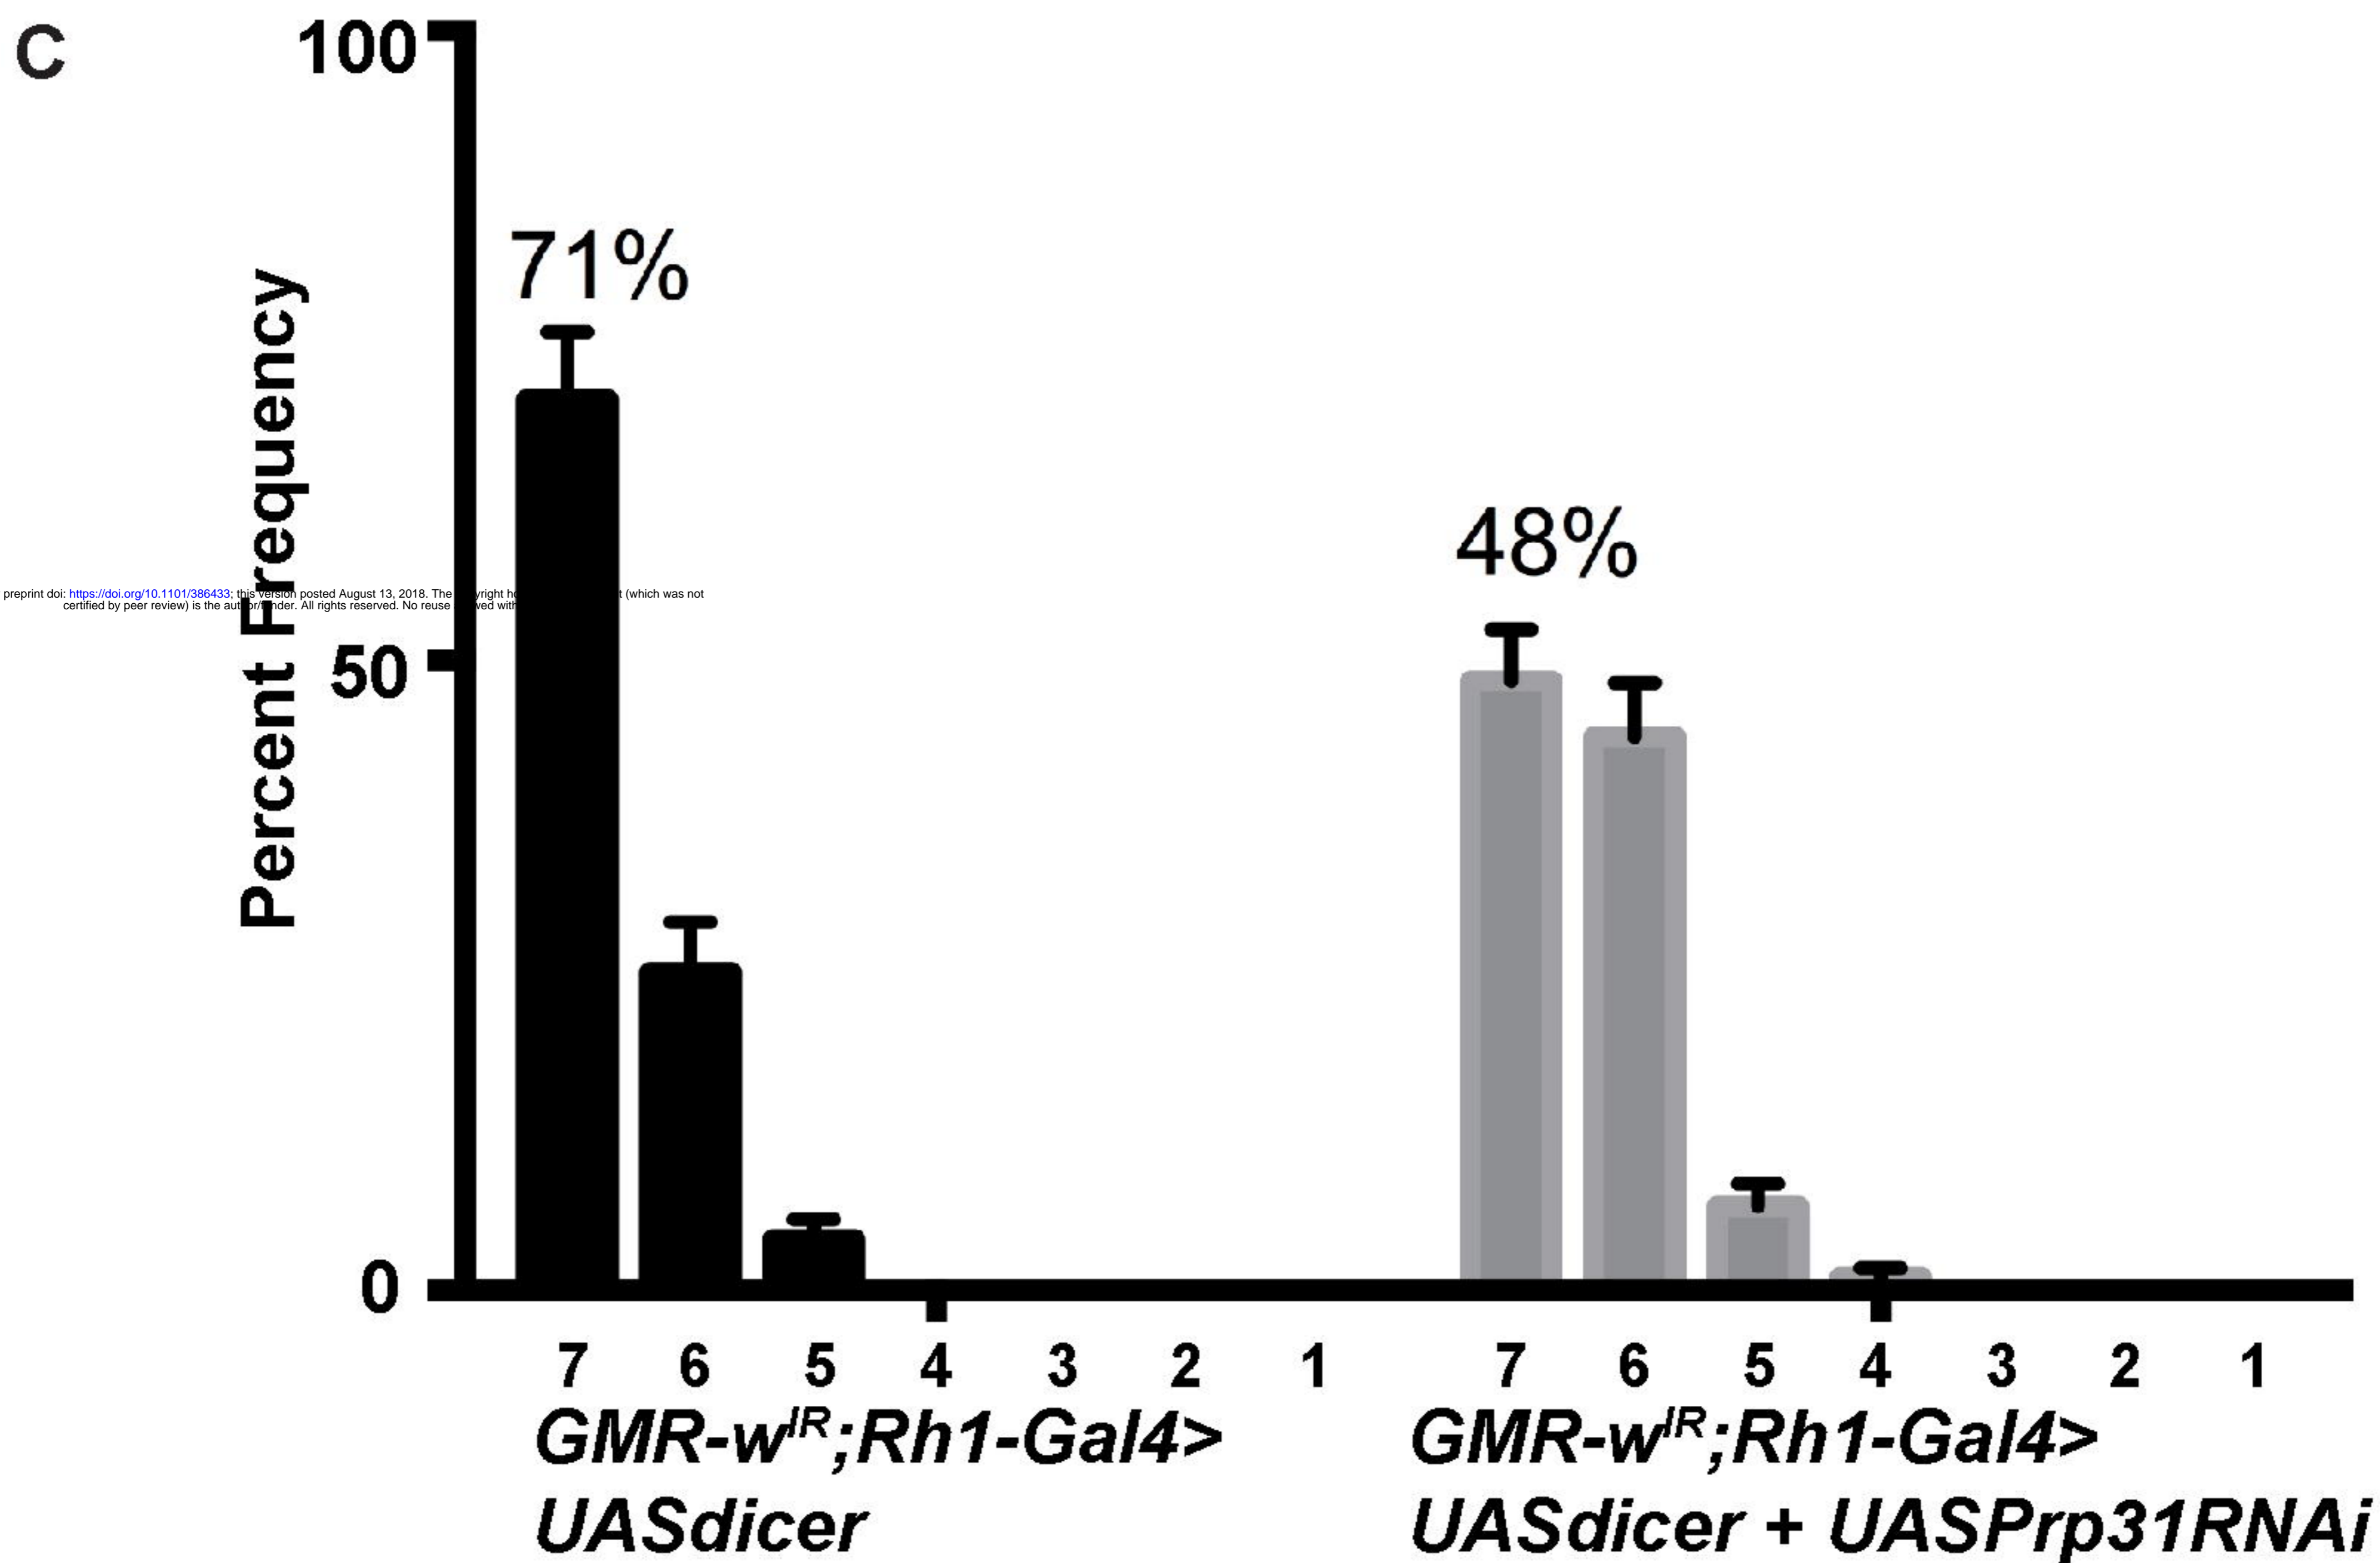

Figure 4



*;cn, bw;*

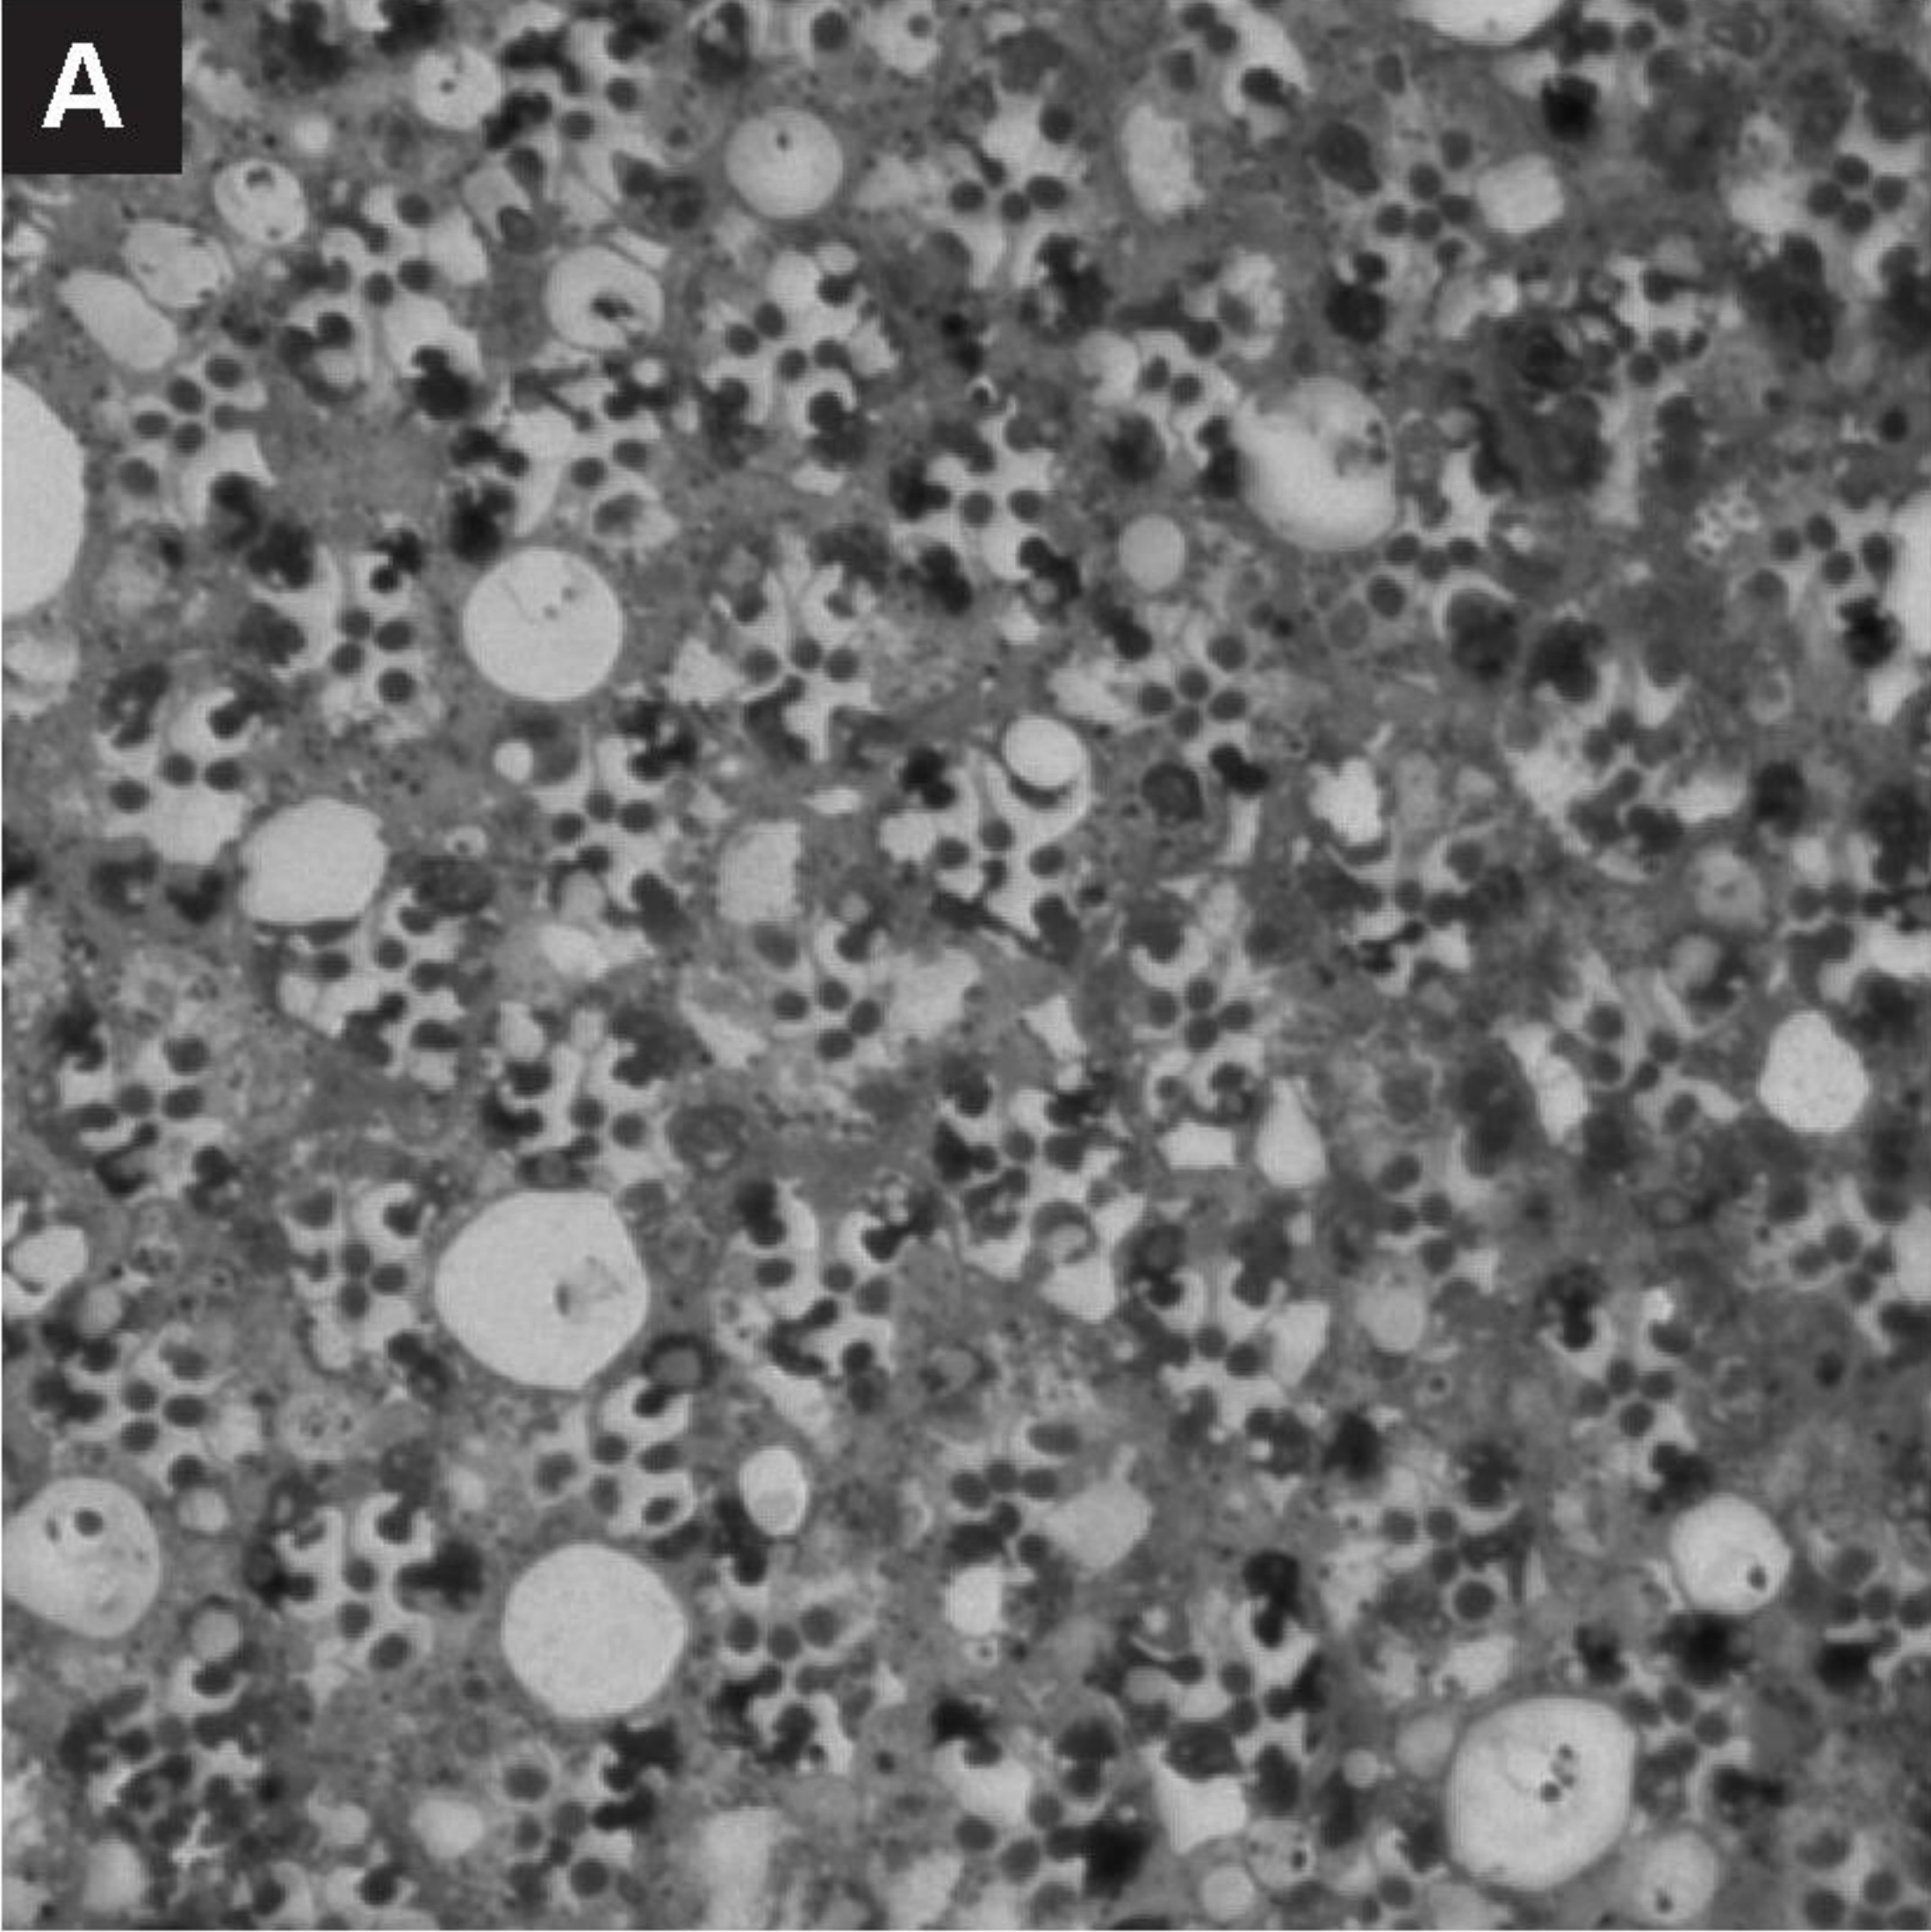

*;cn, bw; Df(3L) Exel6262/+*

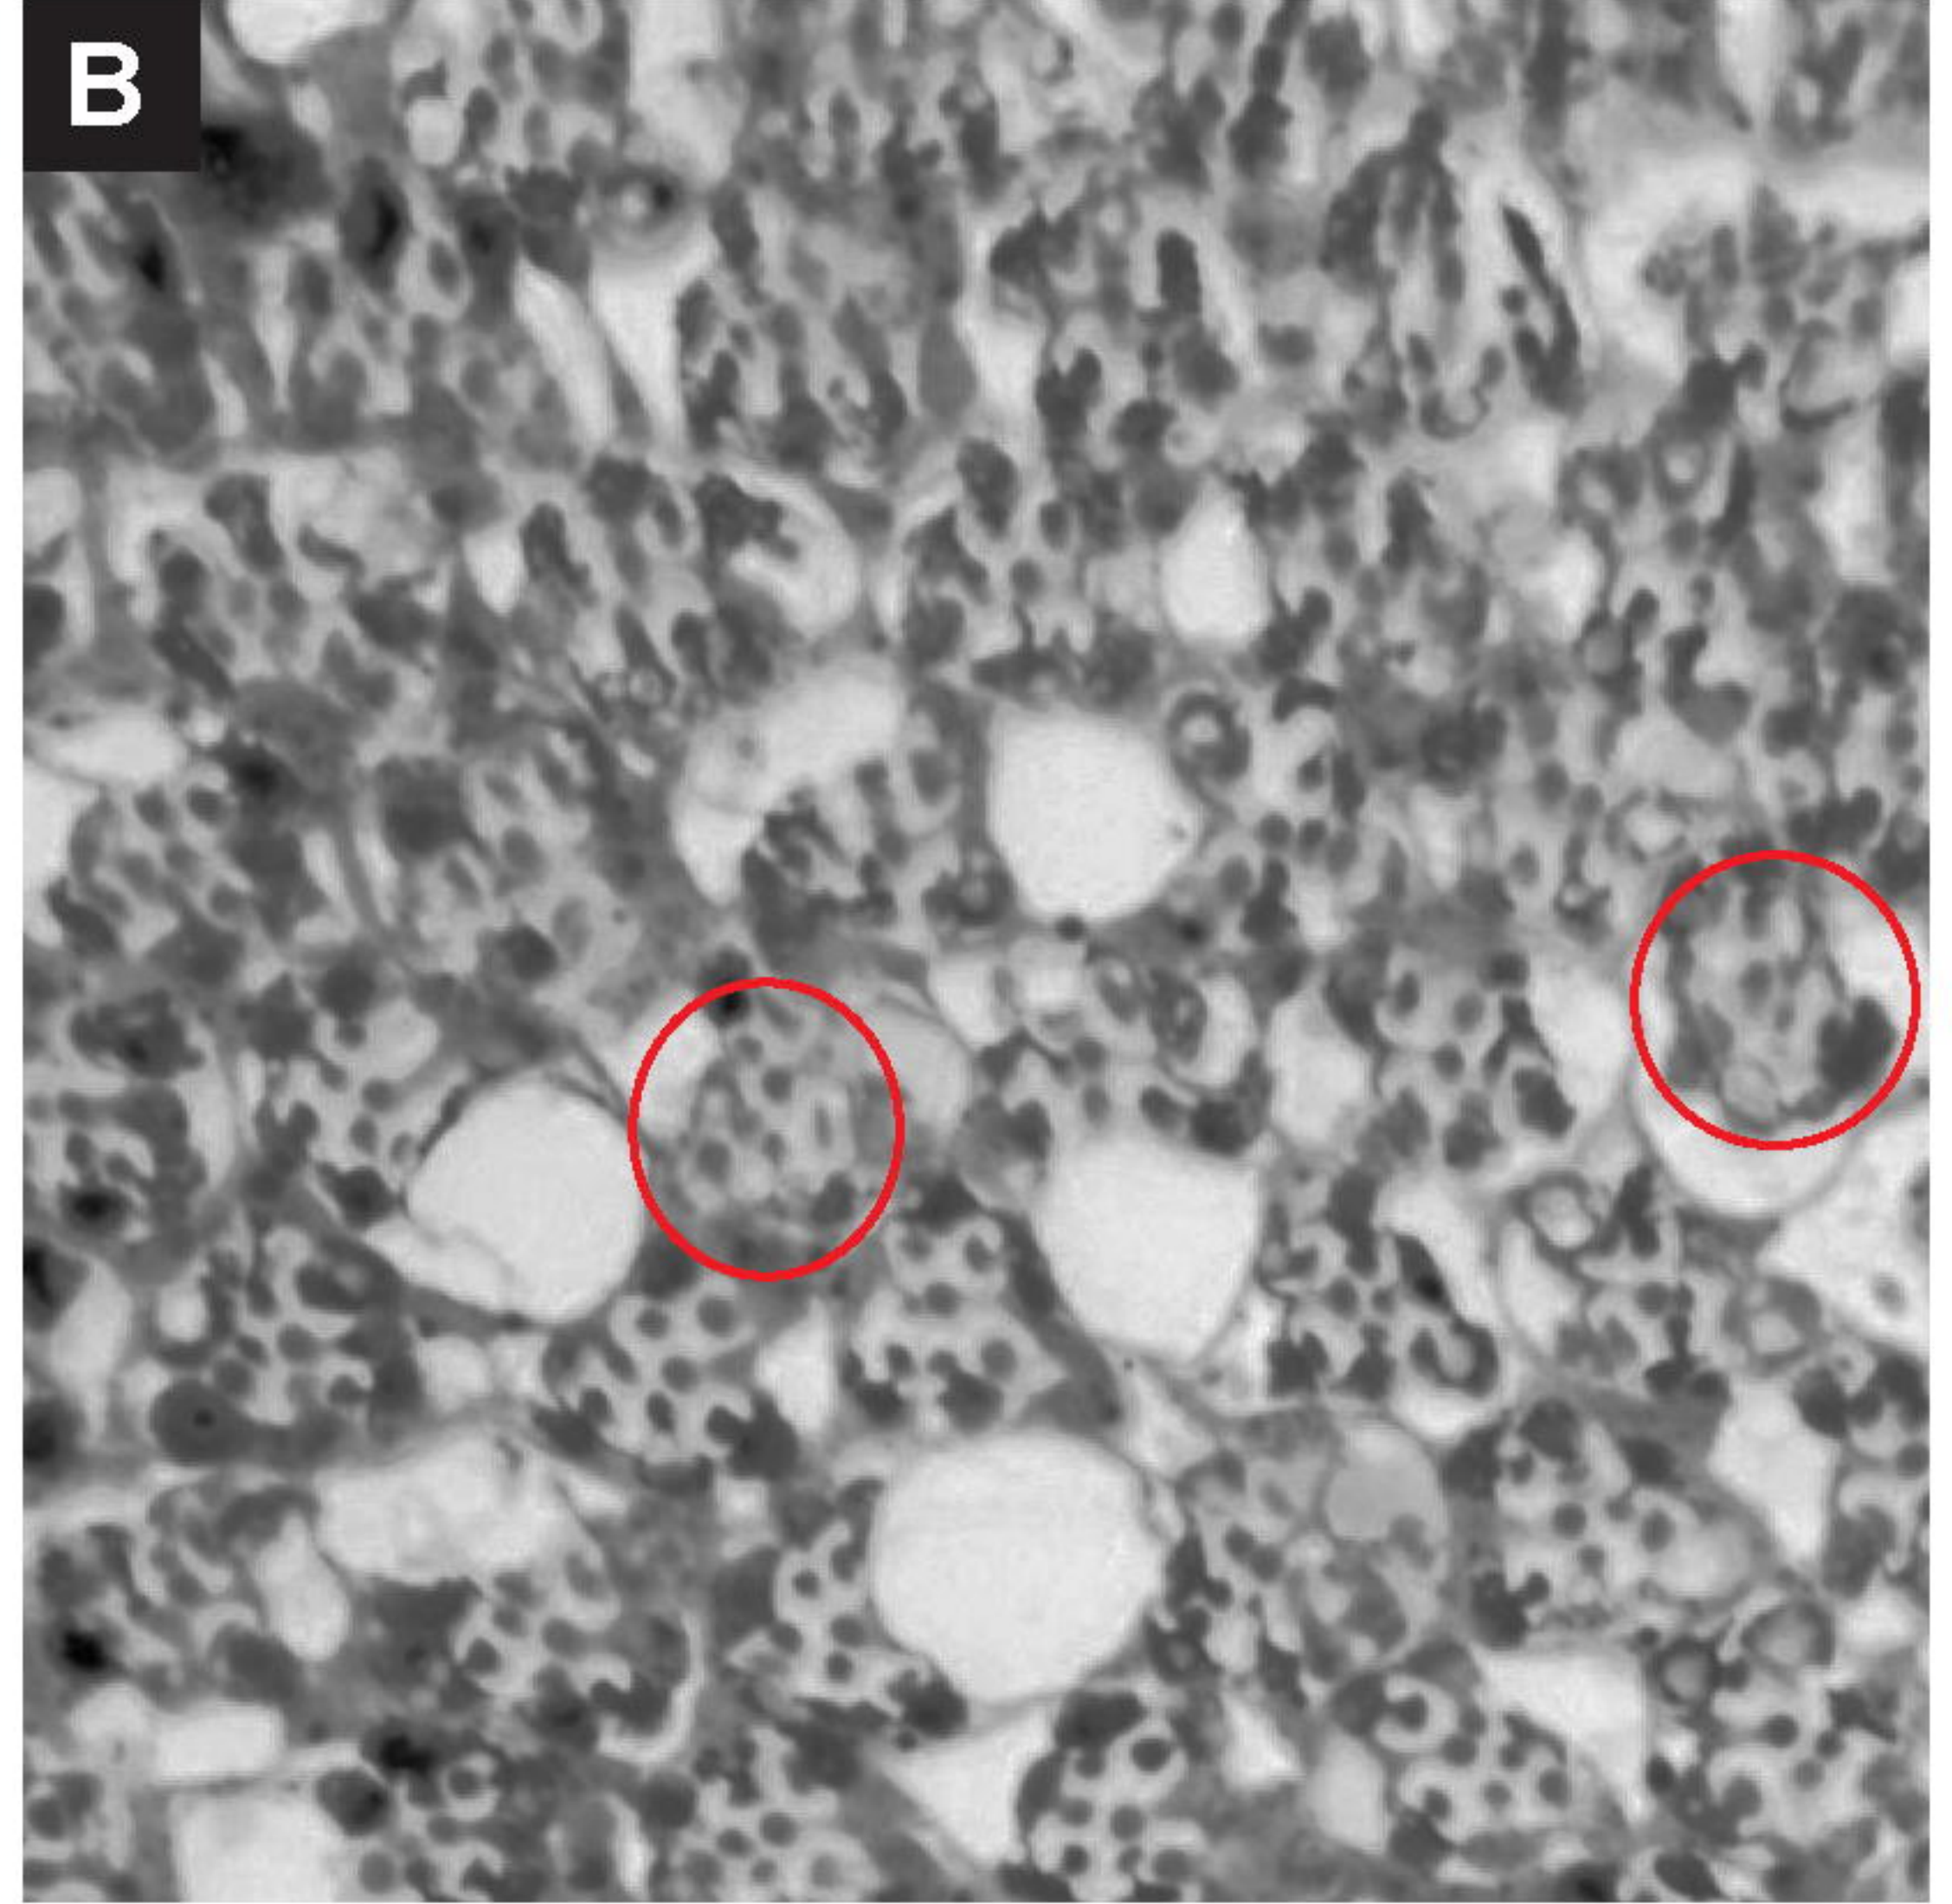

*;cn, bw; Df(3L) ED217/+*

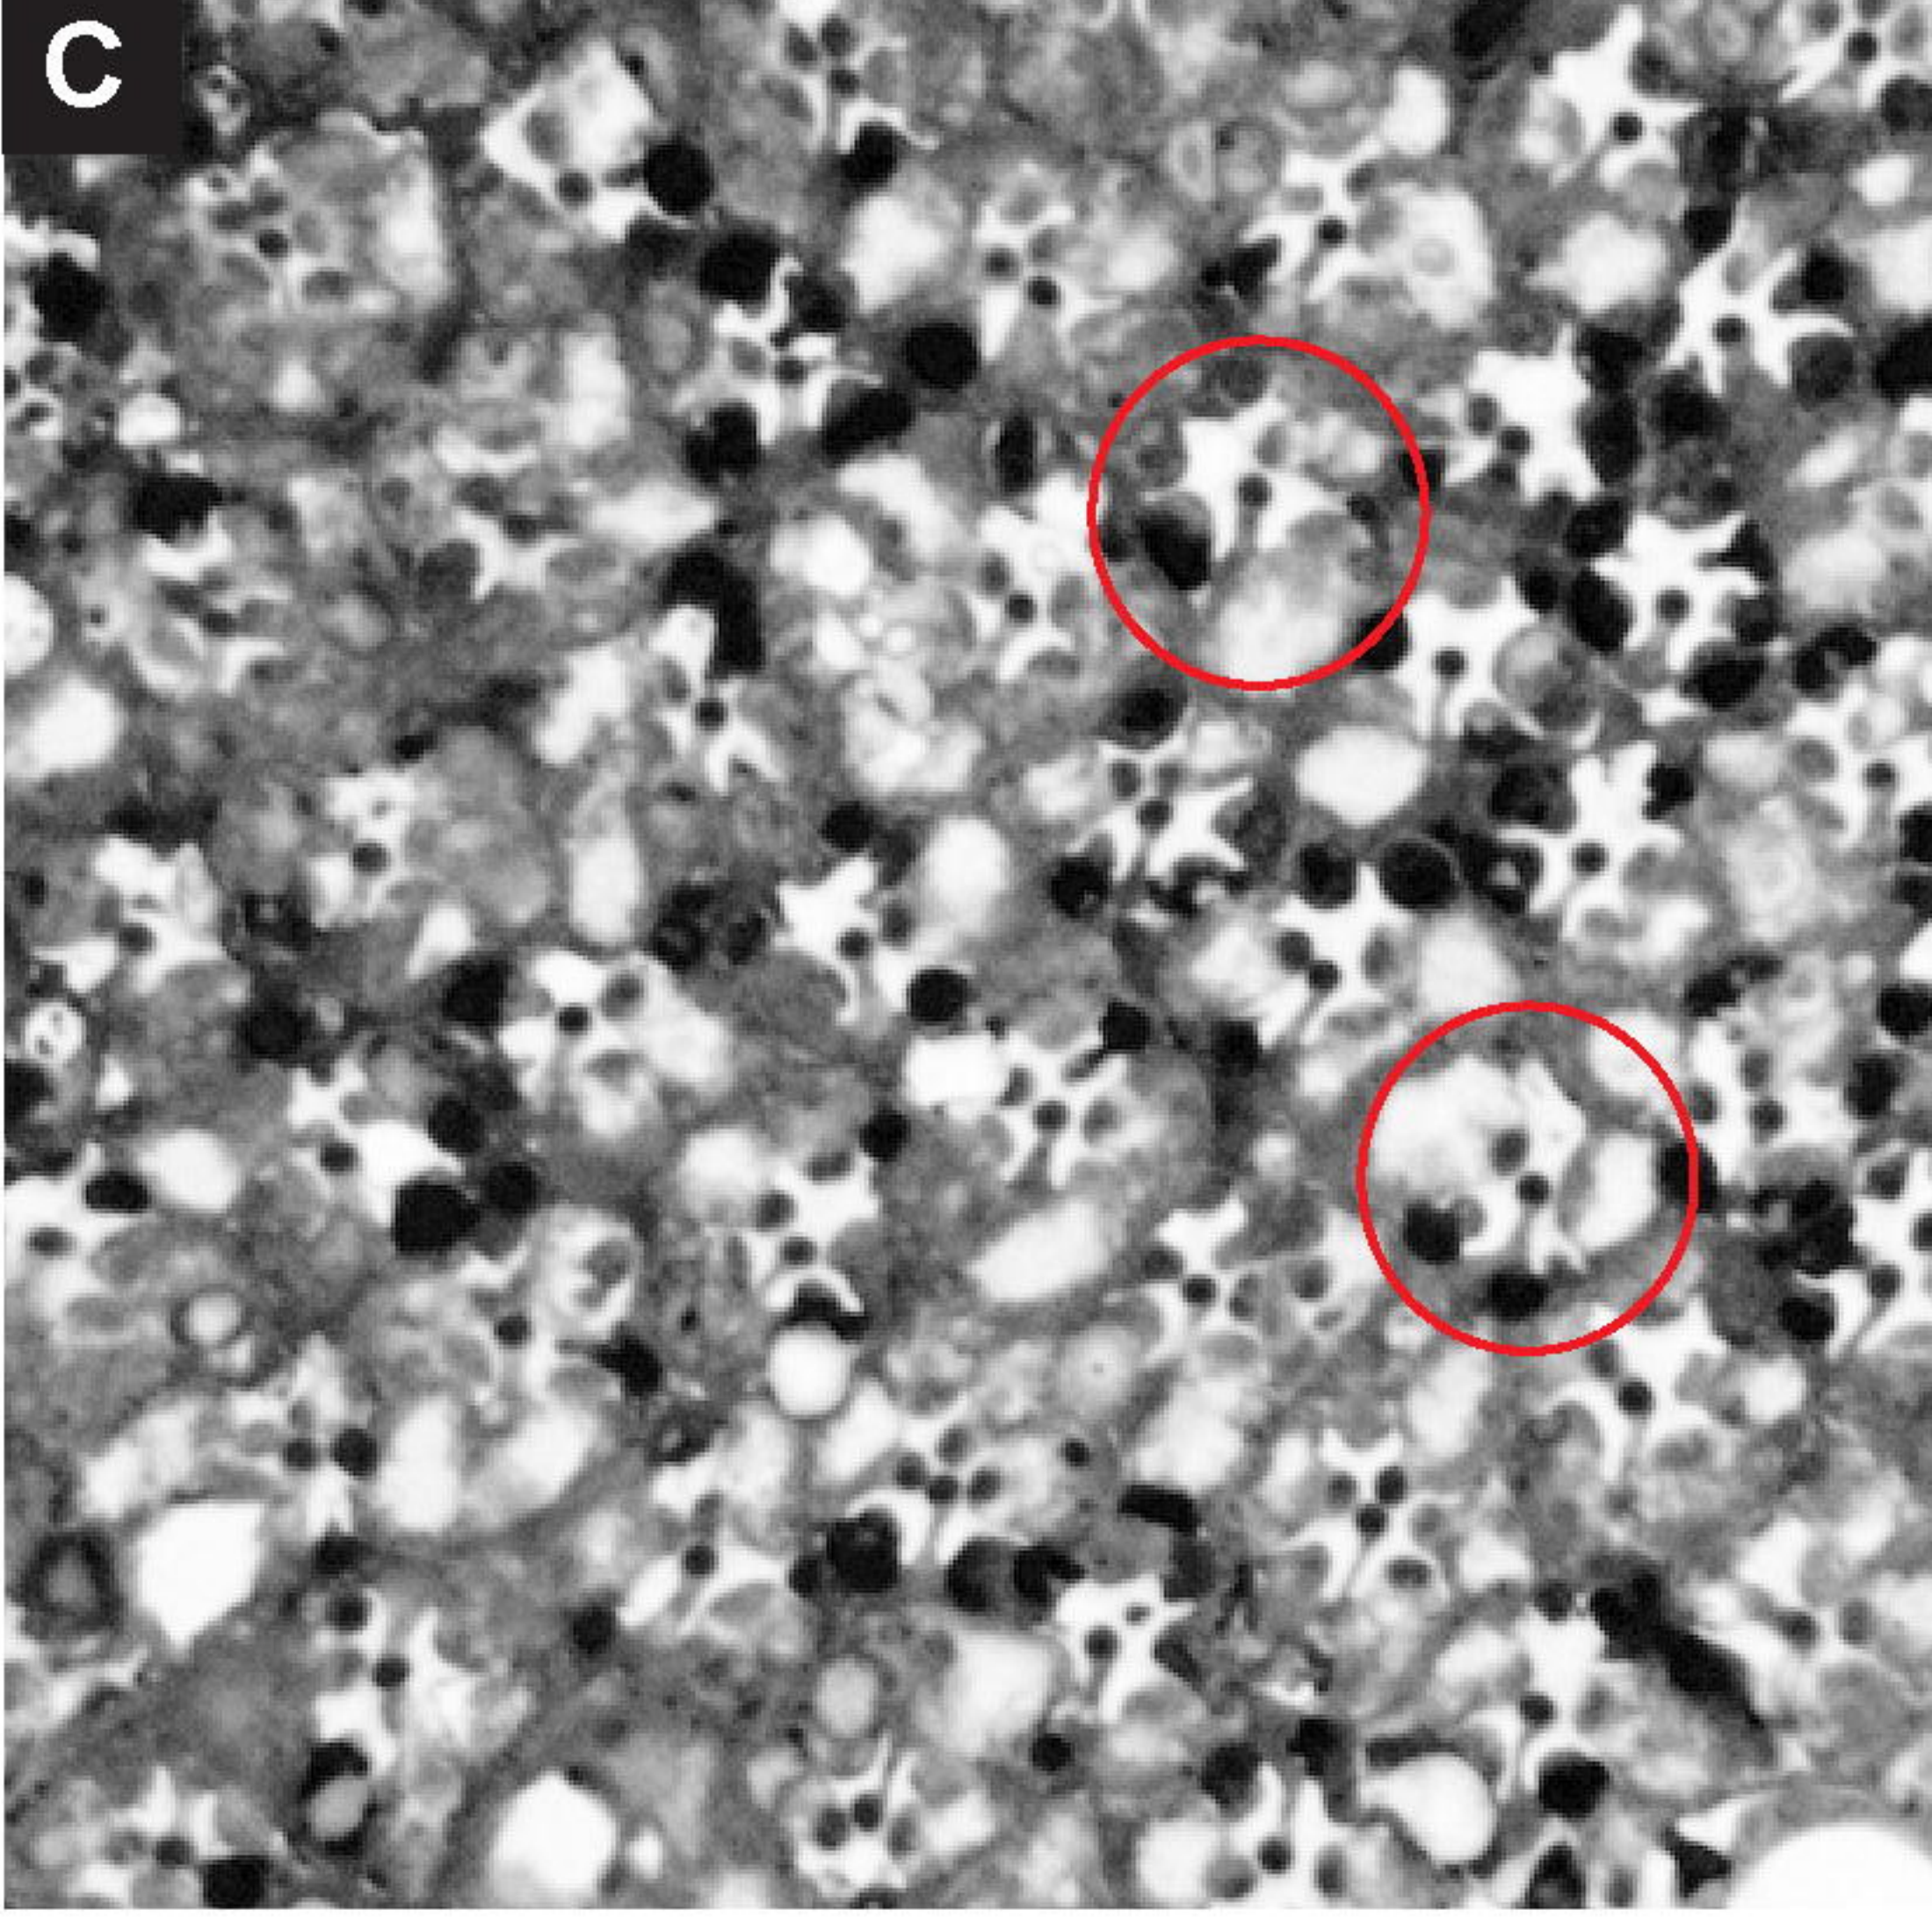

*;cn, bw; Df(3L) ED218/+*

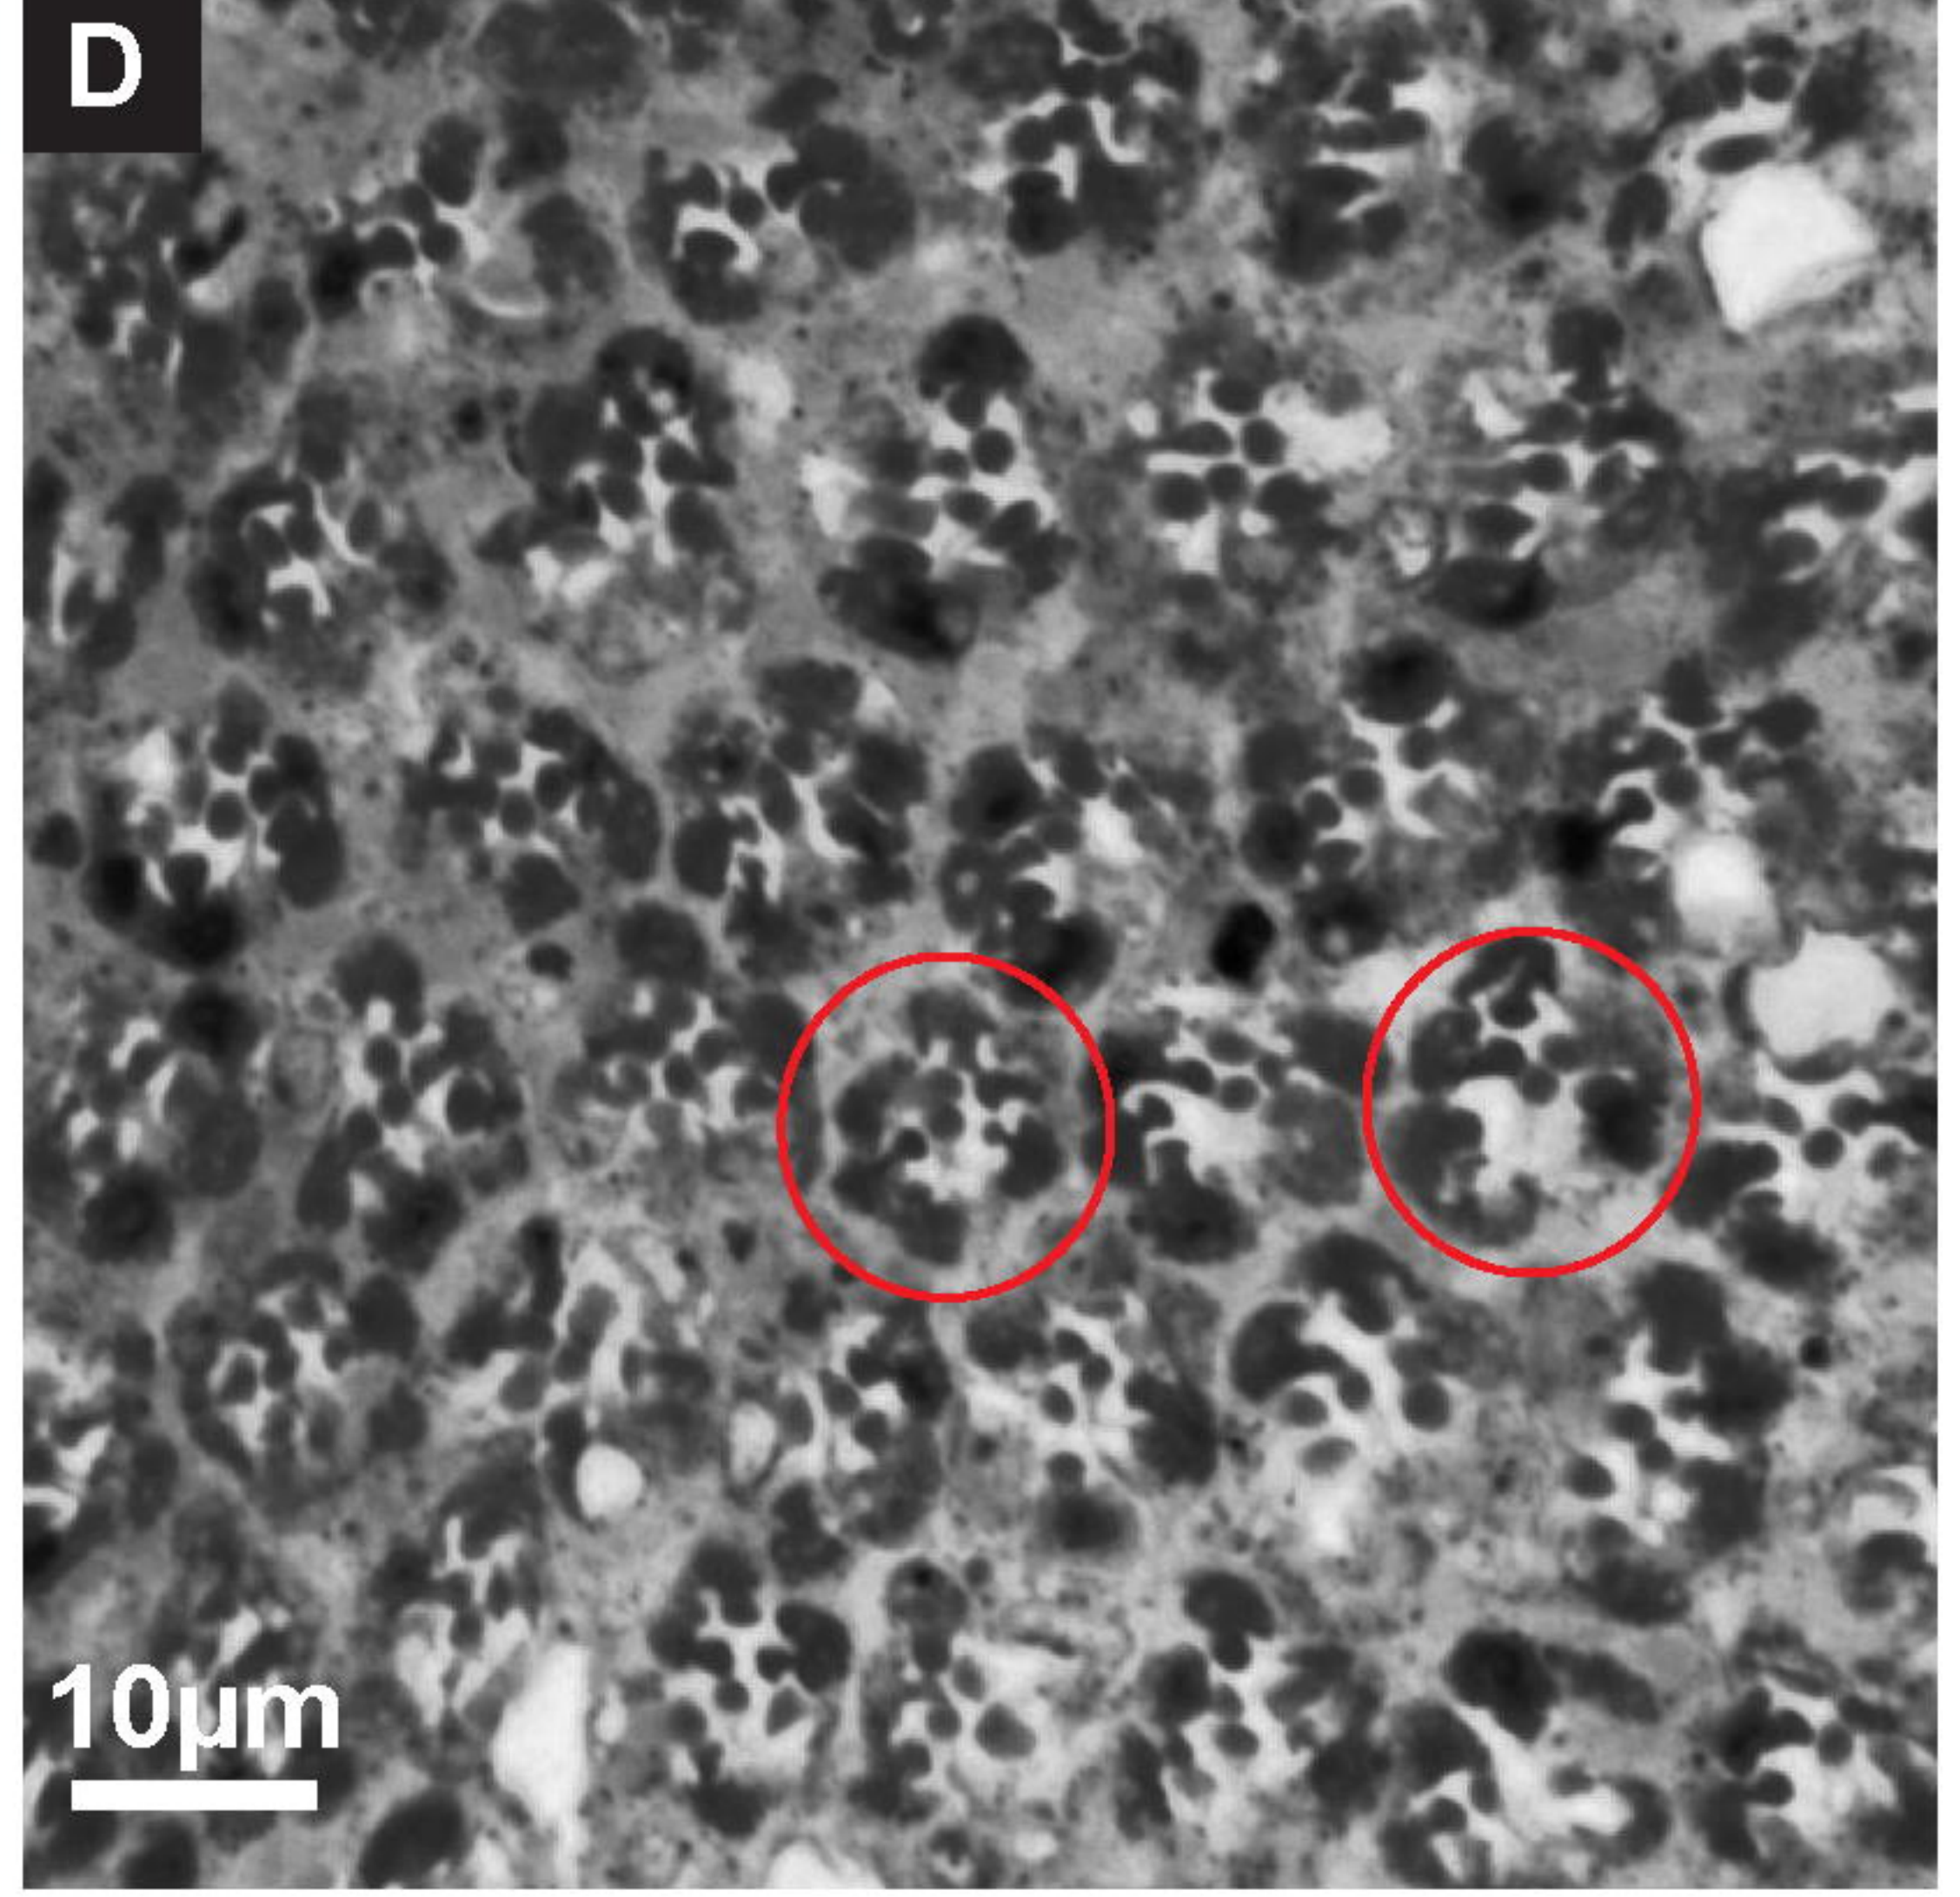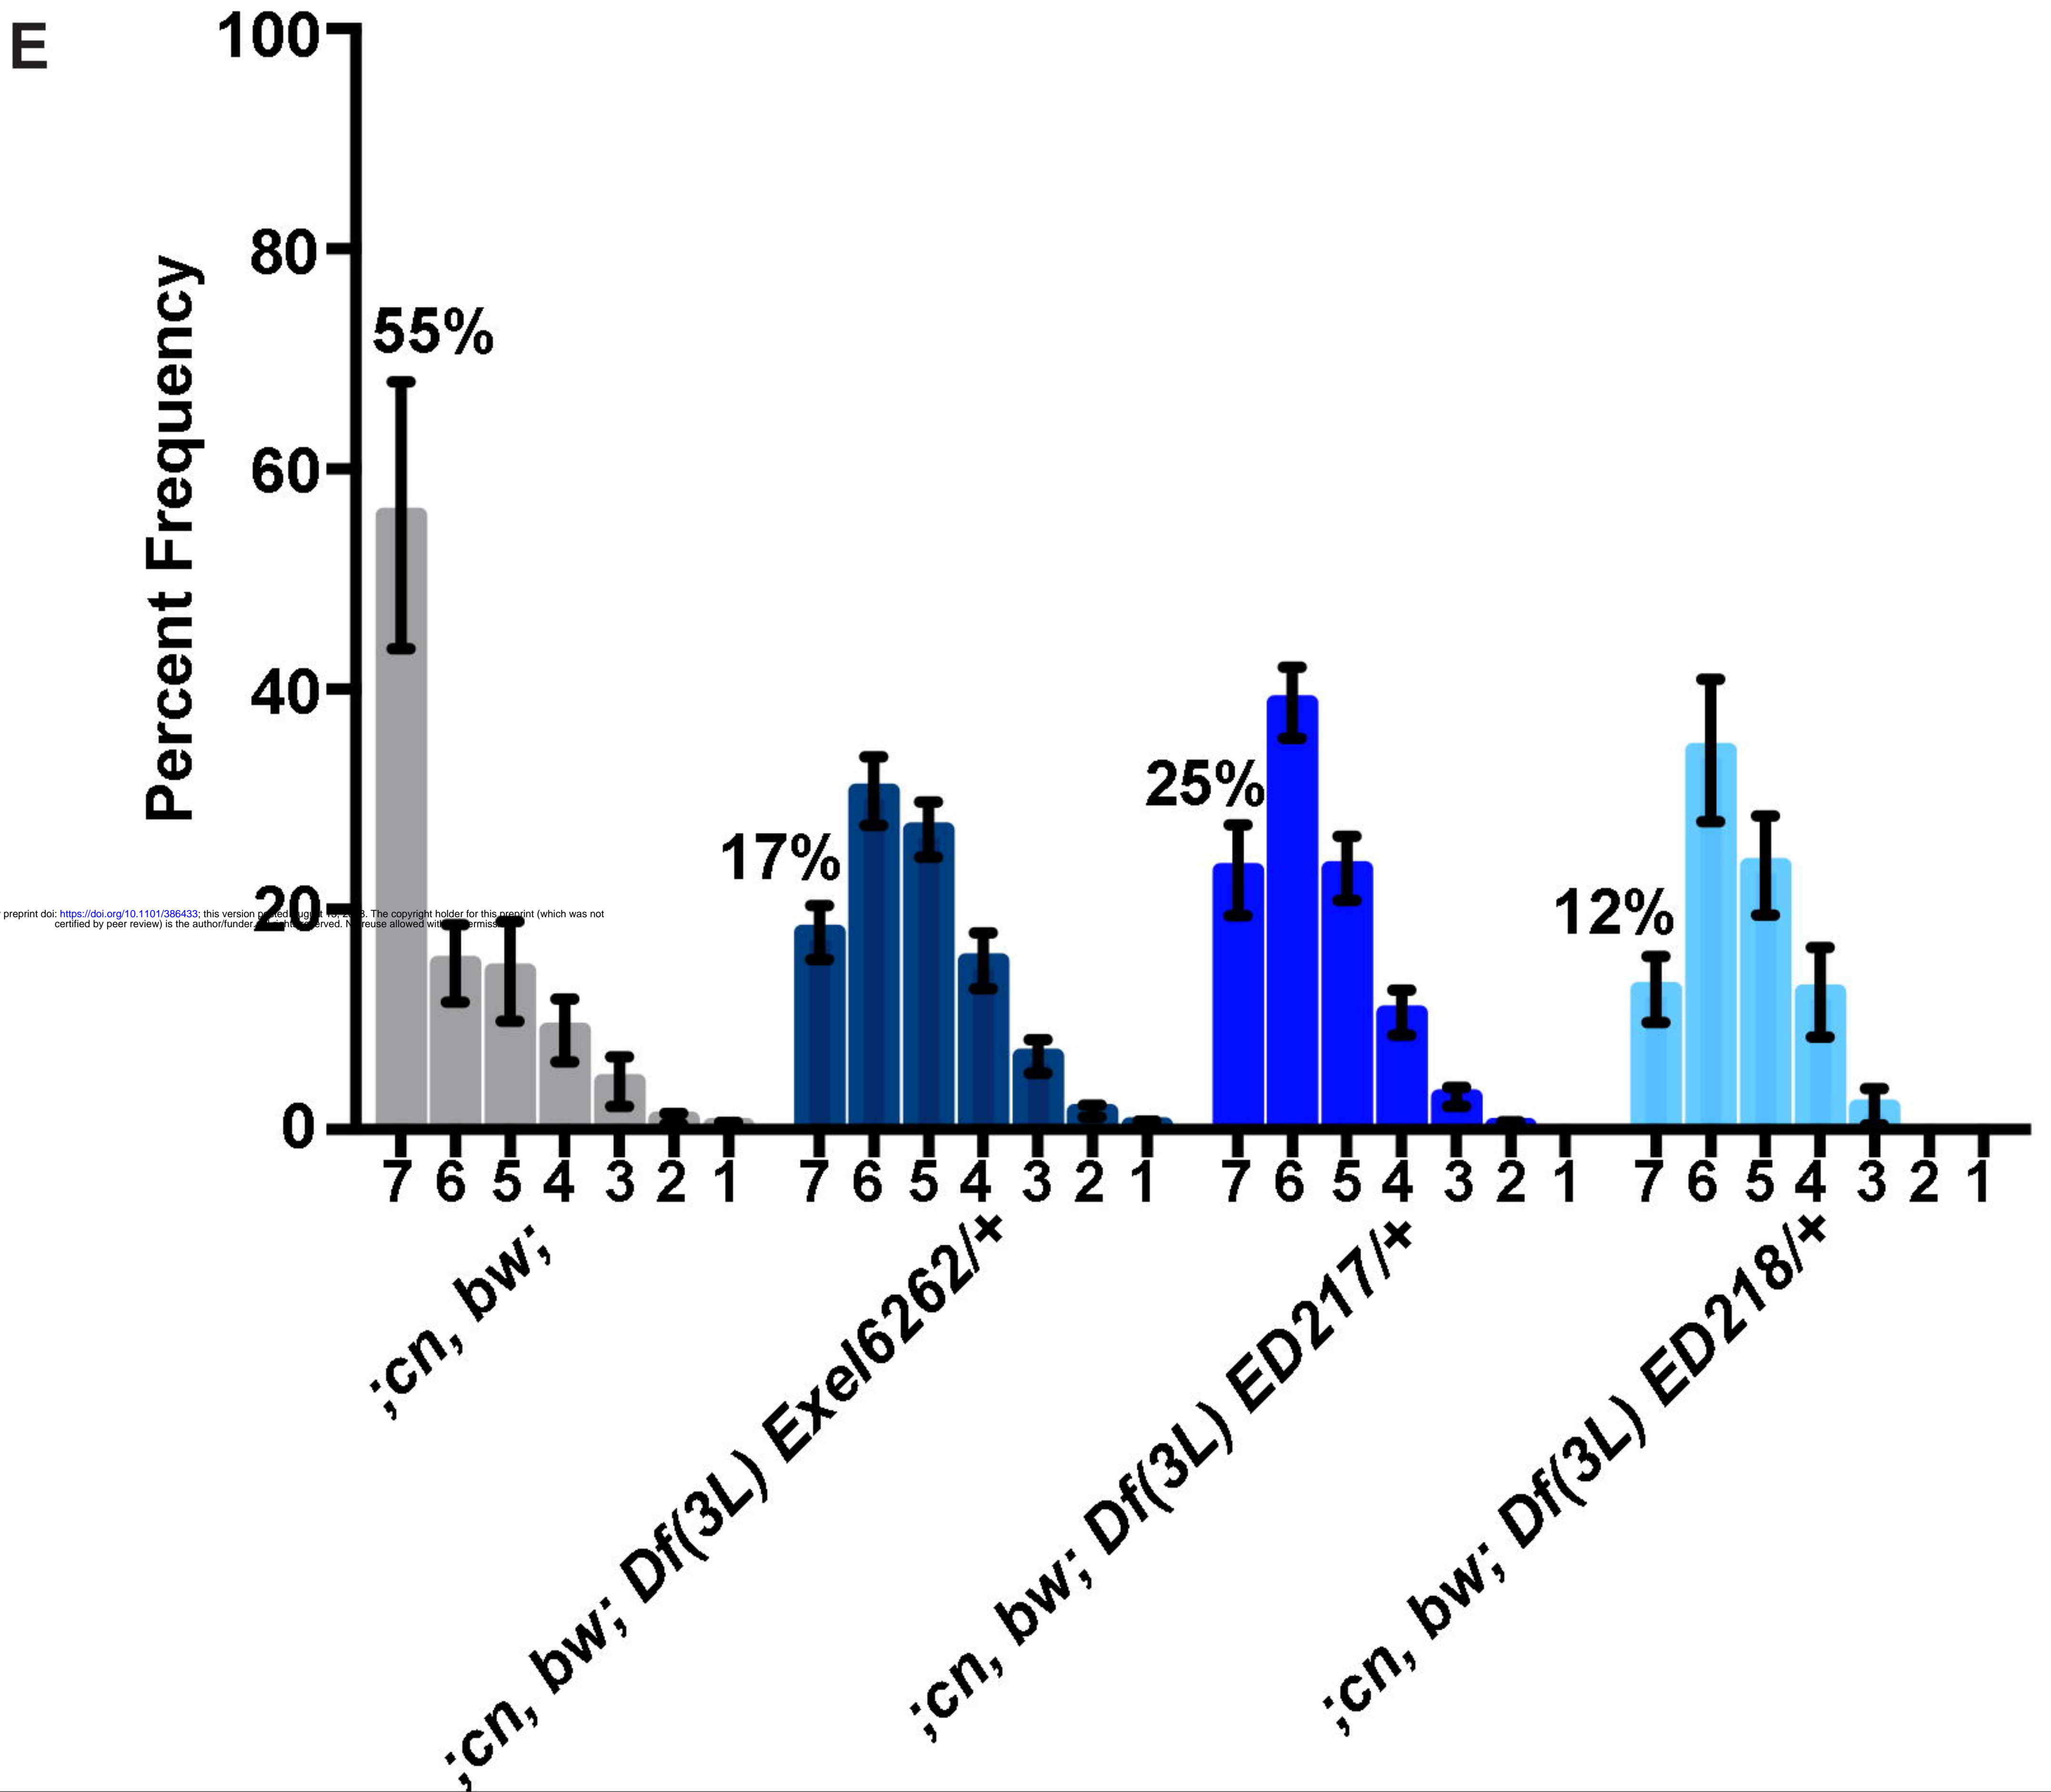

Figure 5



*w\*;;*

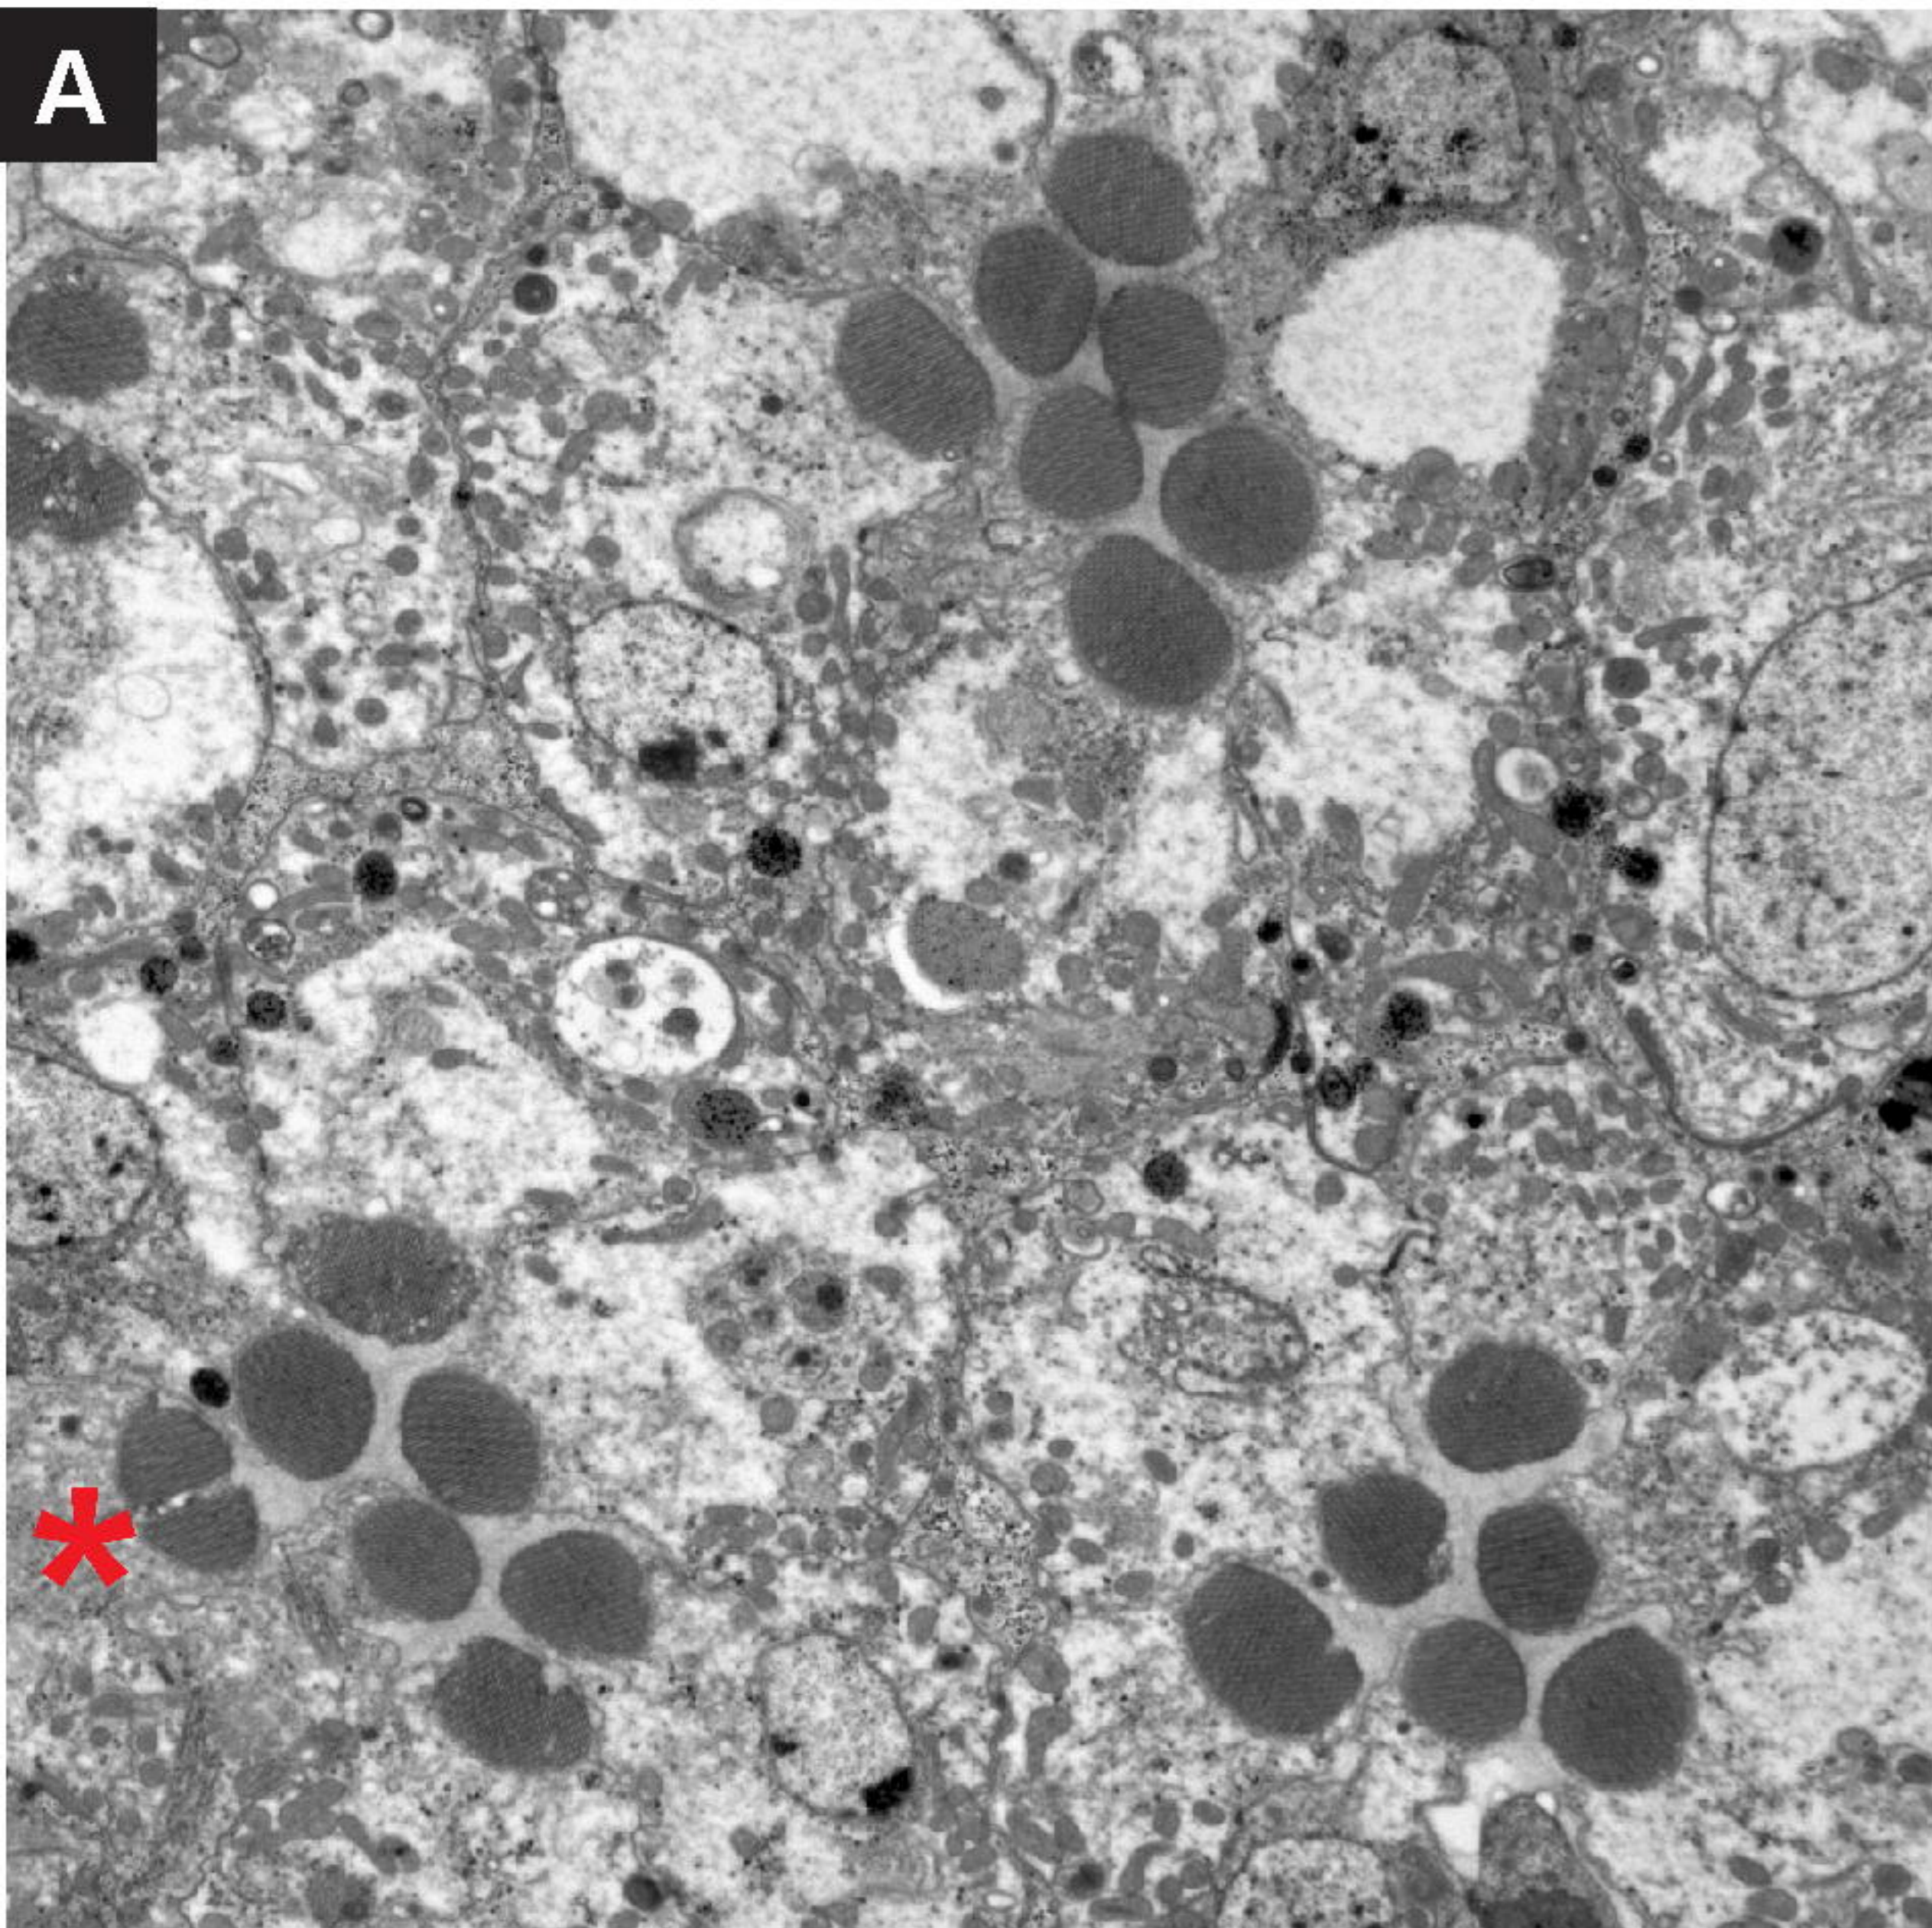

*w\*;;st1/+*

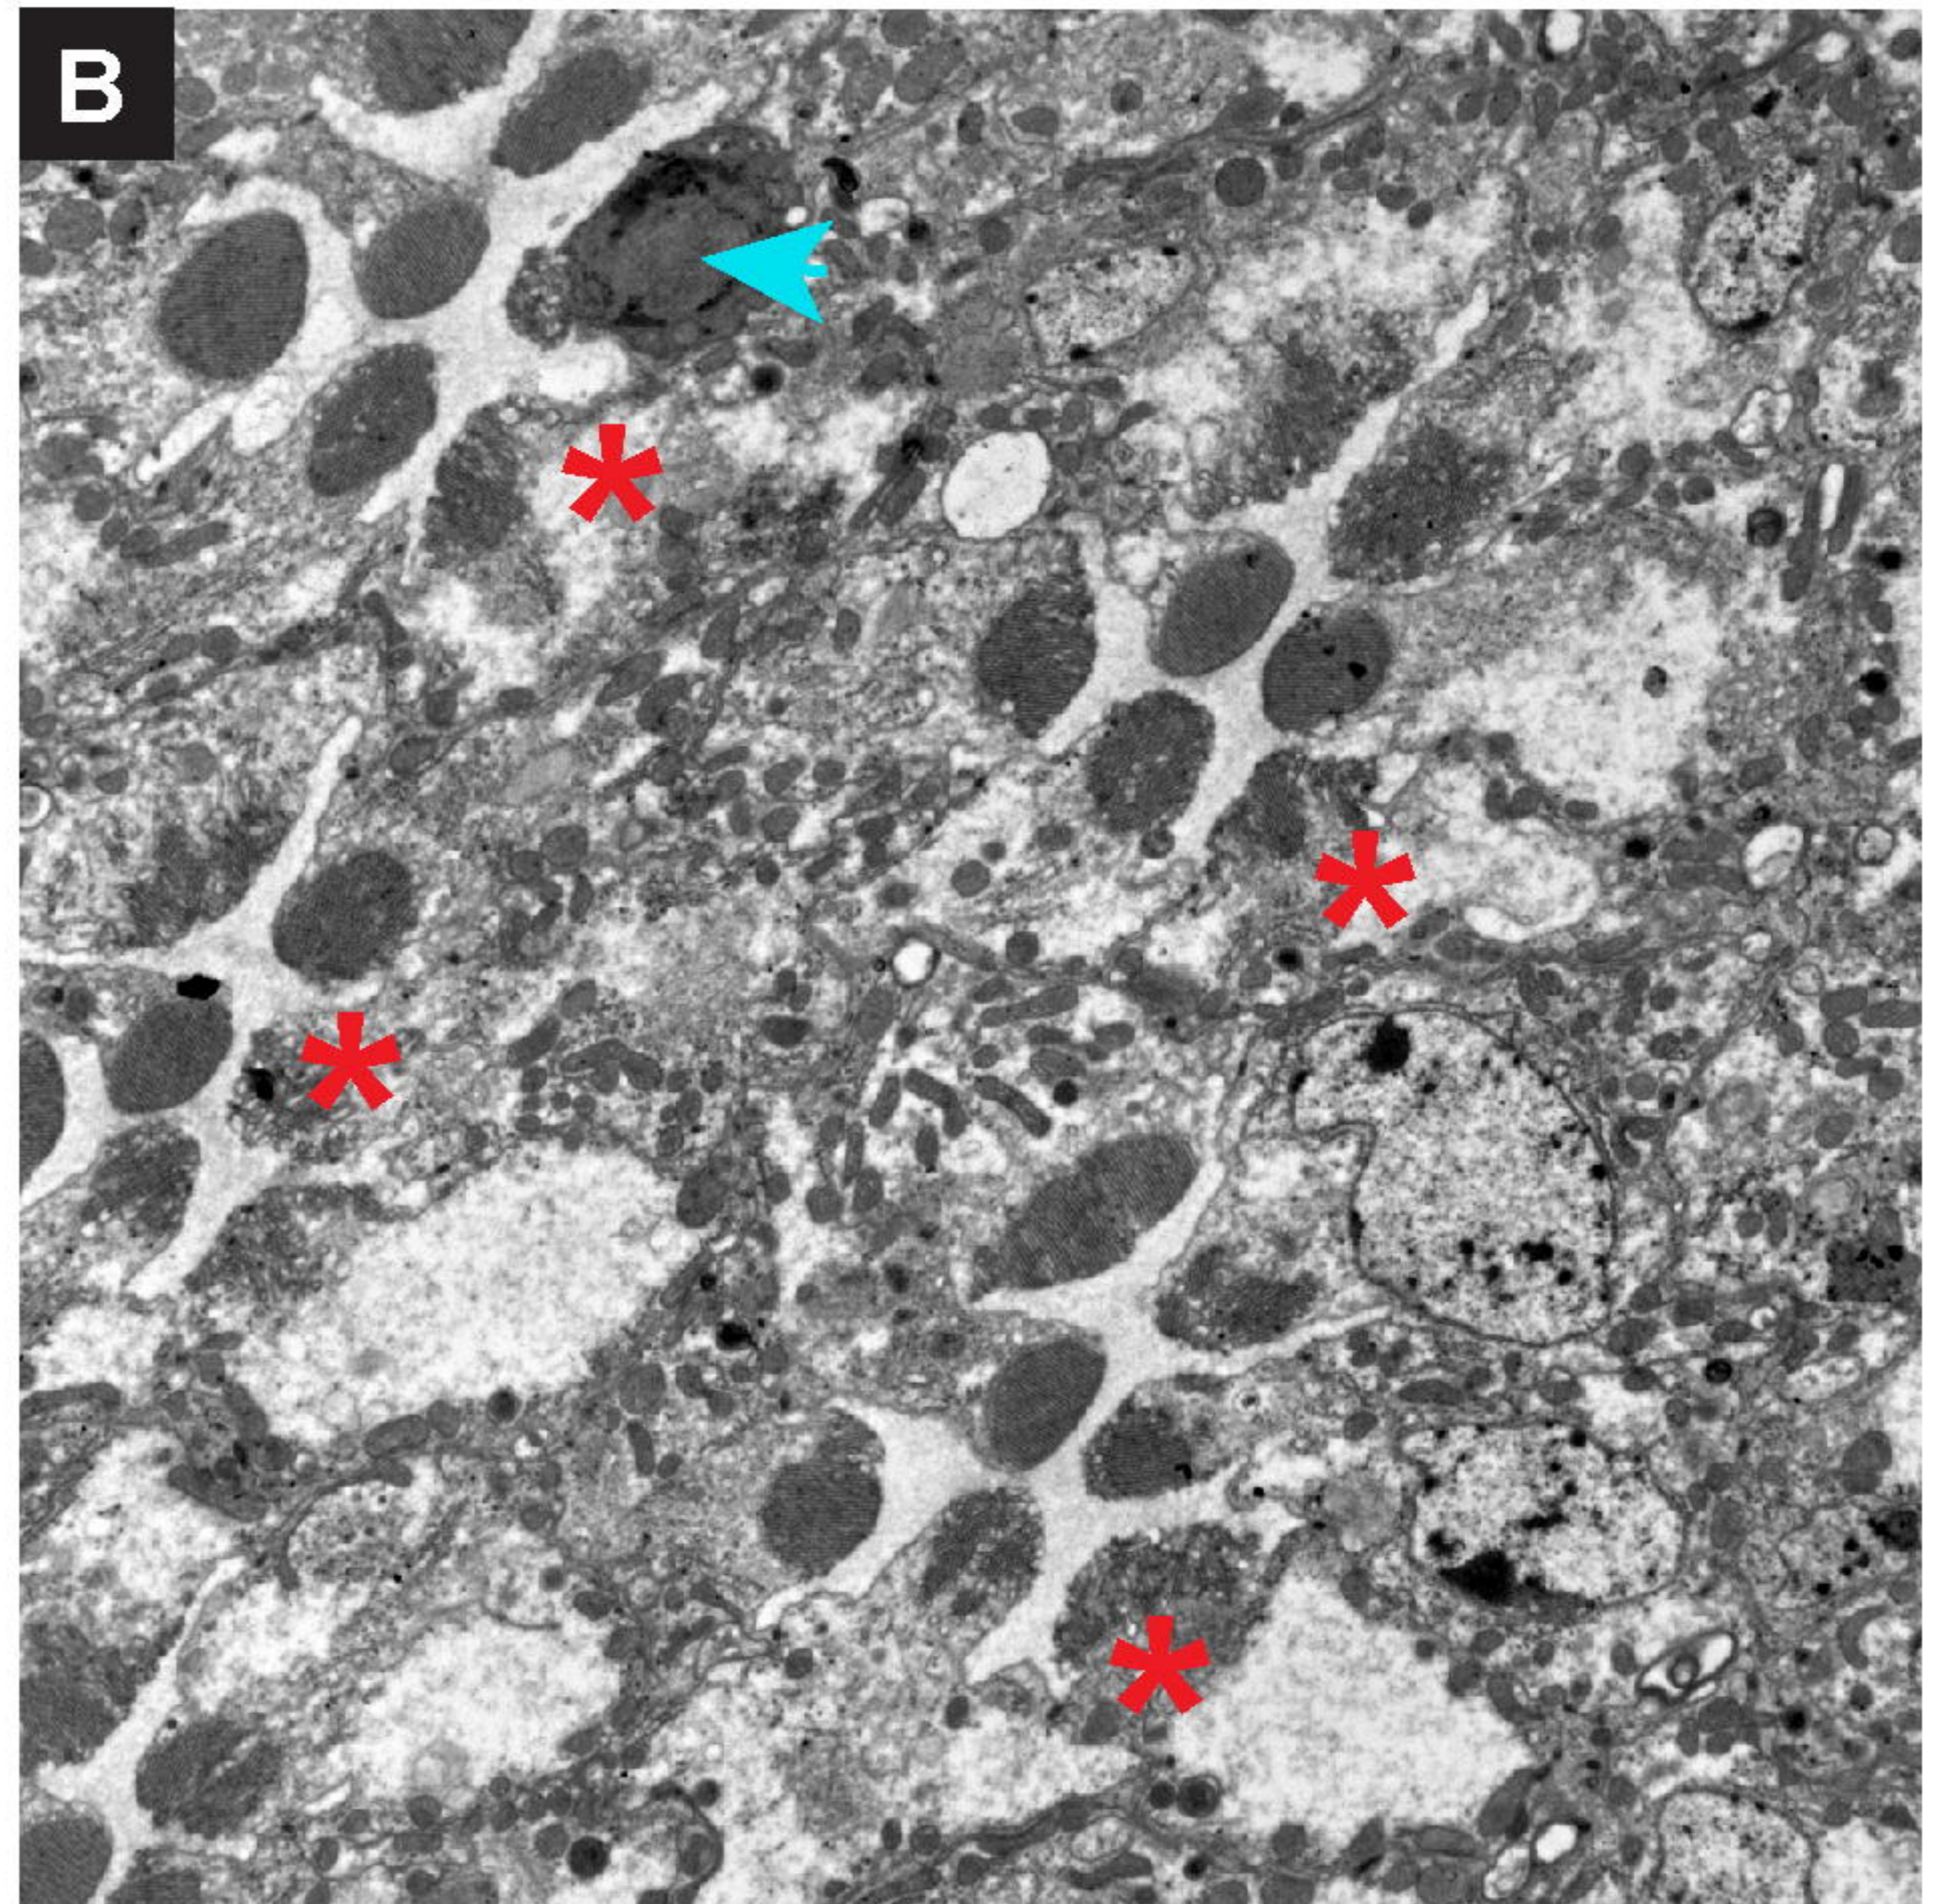

*w\*;;Prp31<sup>P18</sup>, st1/+*

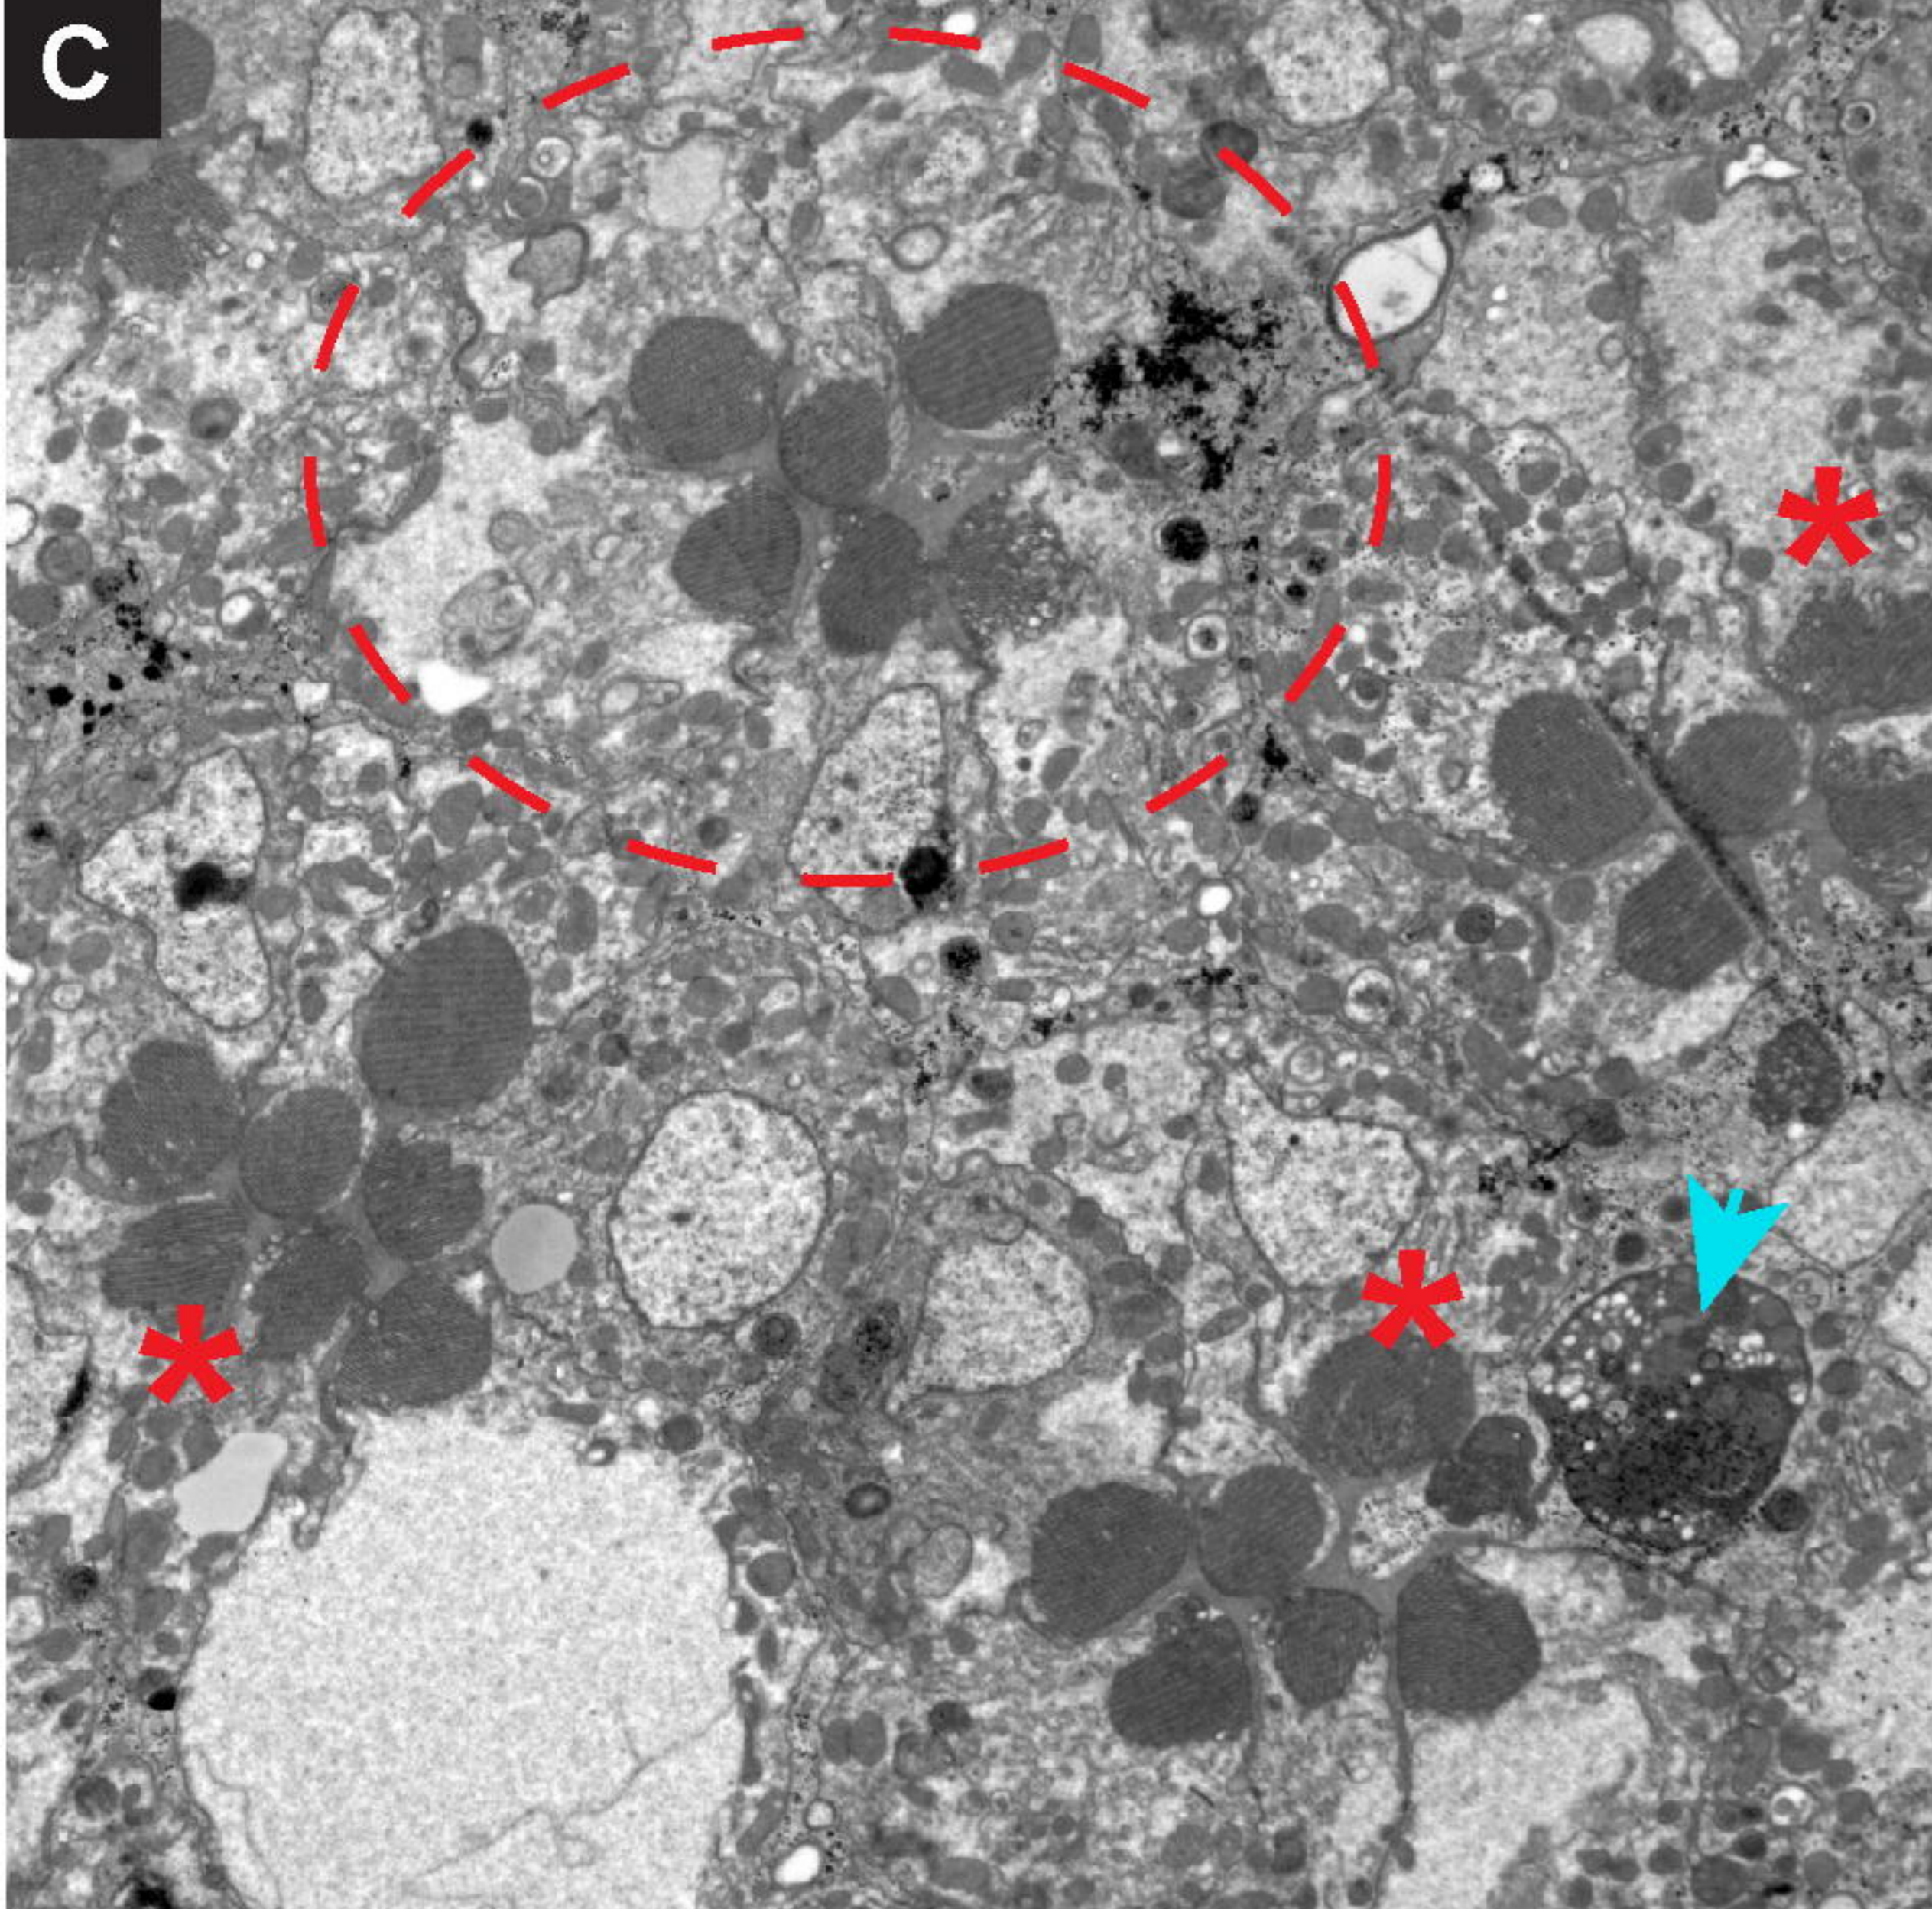

*w\*;;Prp31<sup>P17</sup>, st1/+*

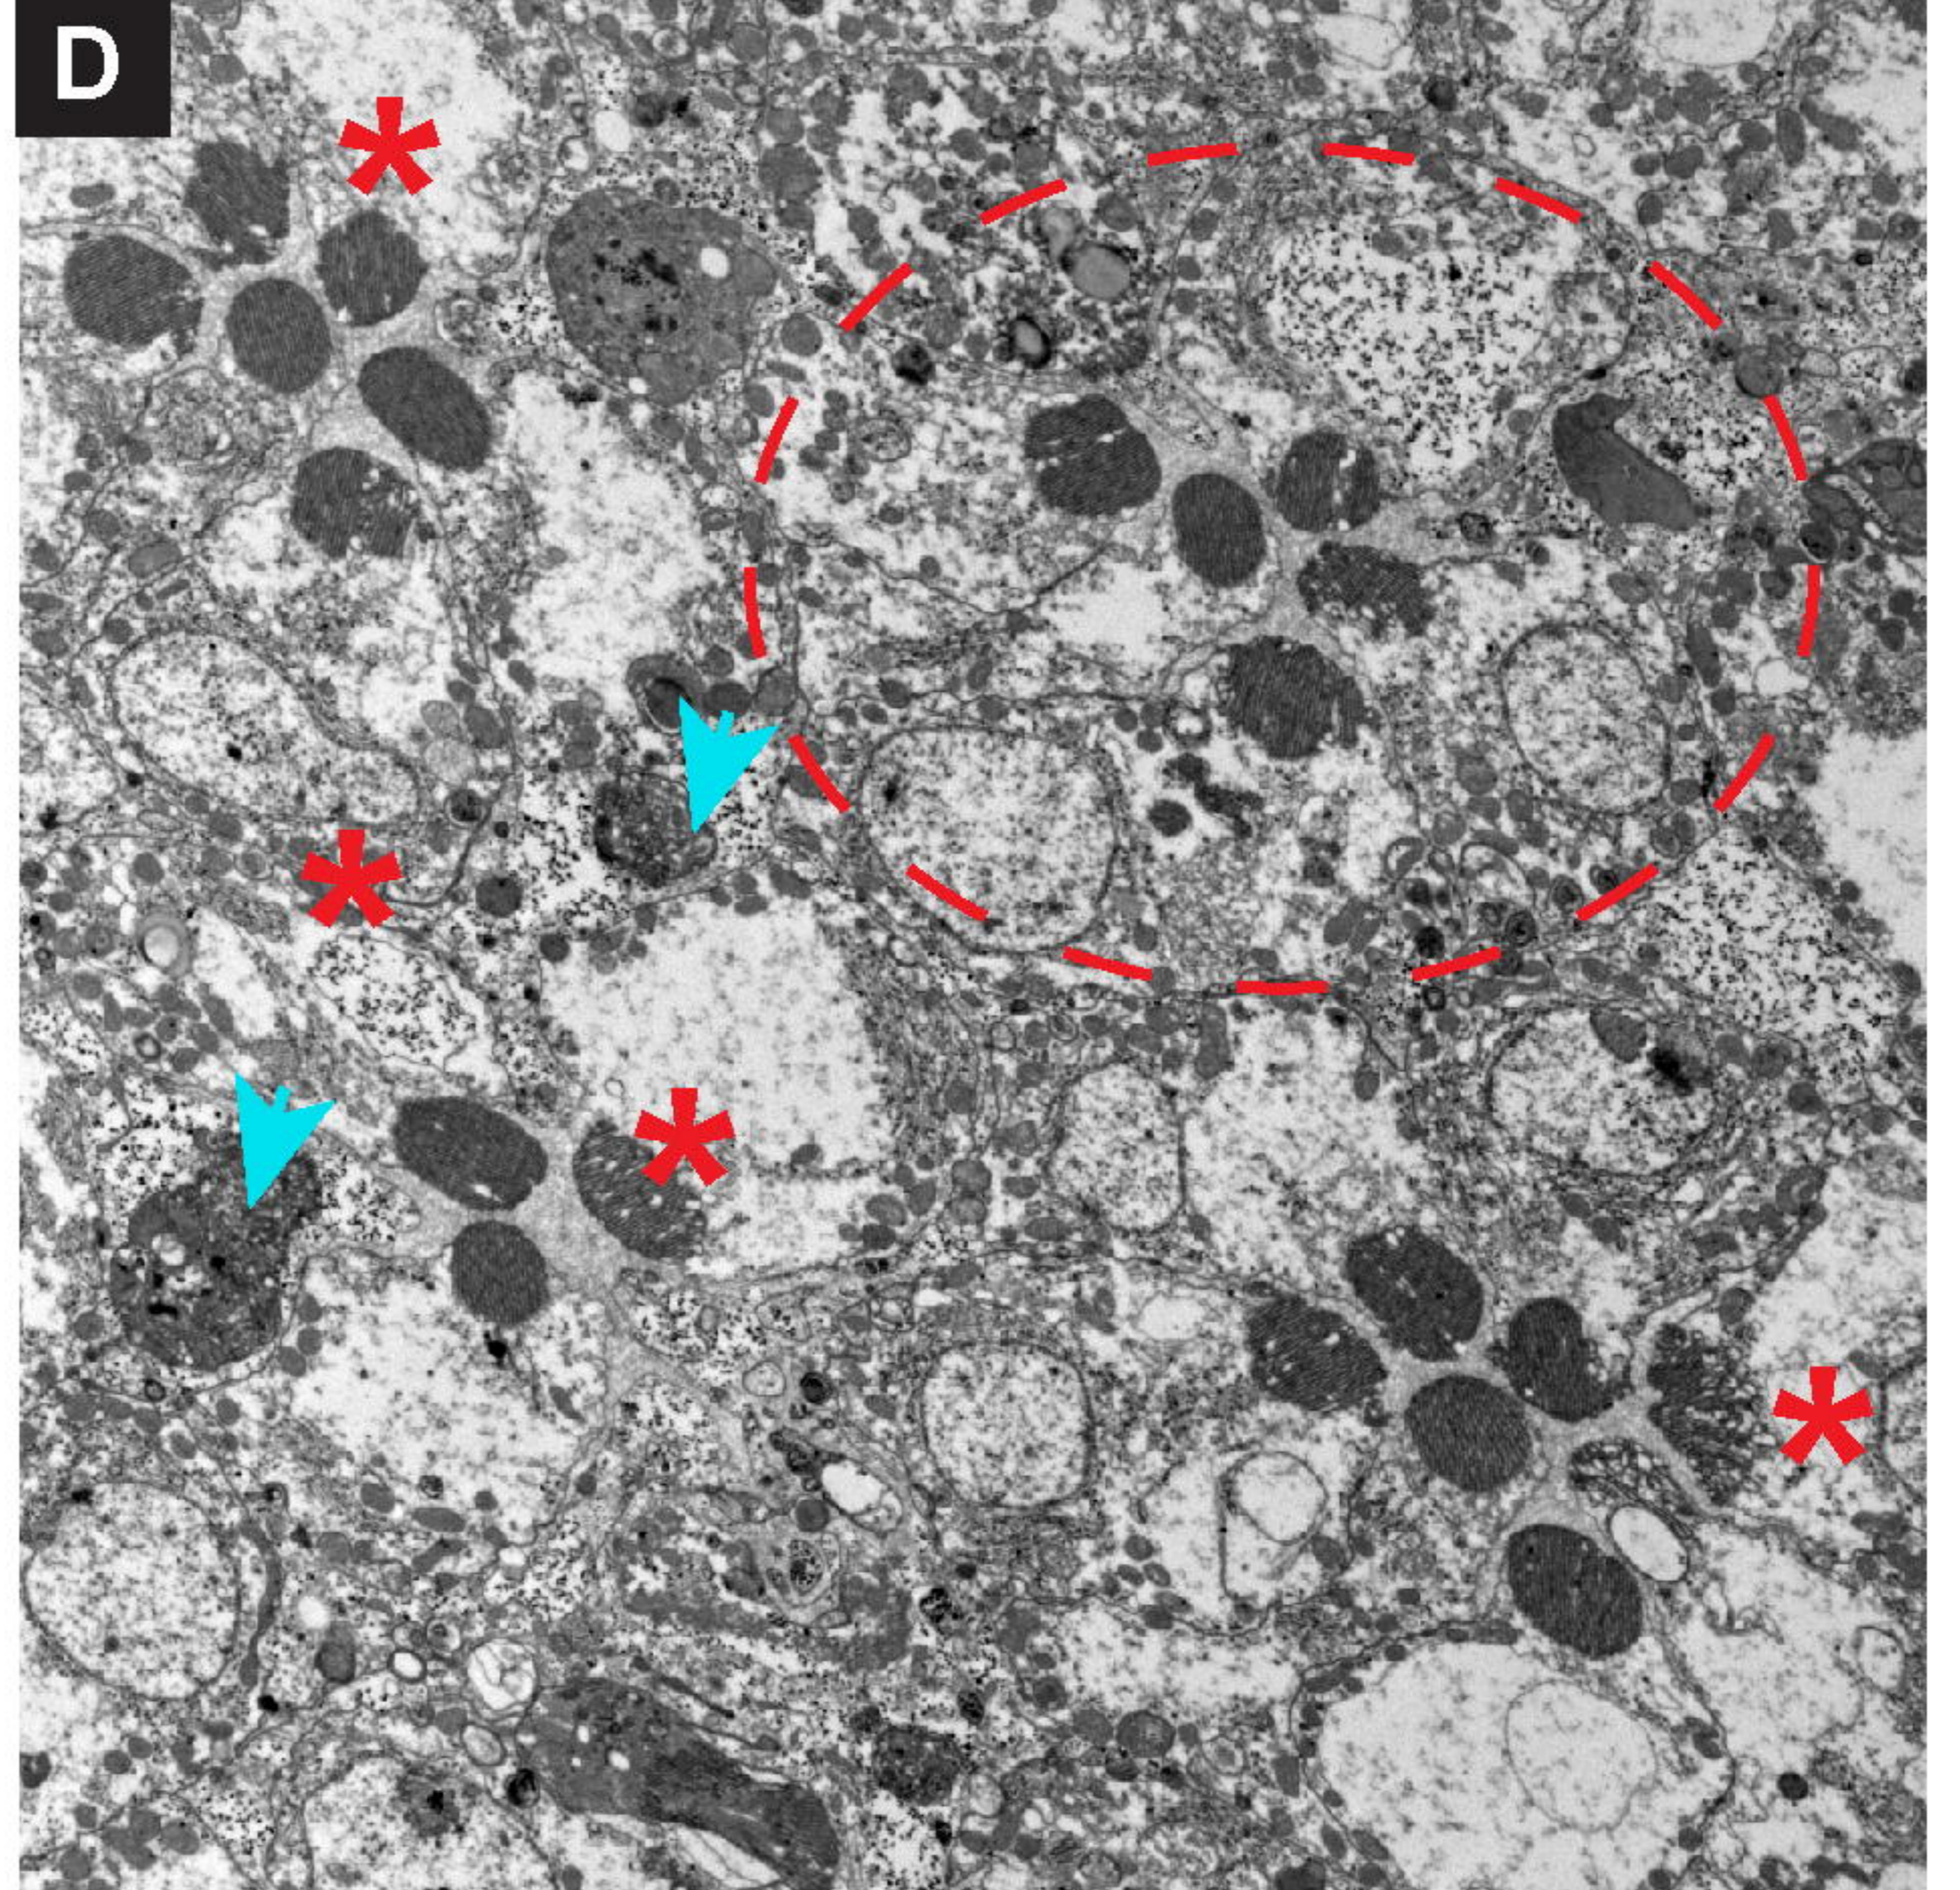

*cn, bw; Df(3L) ED217/+*

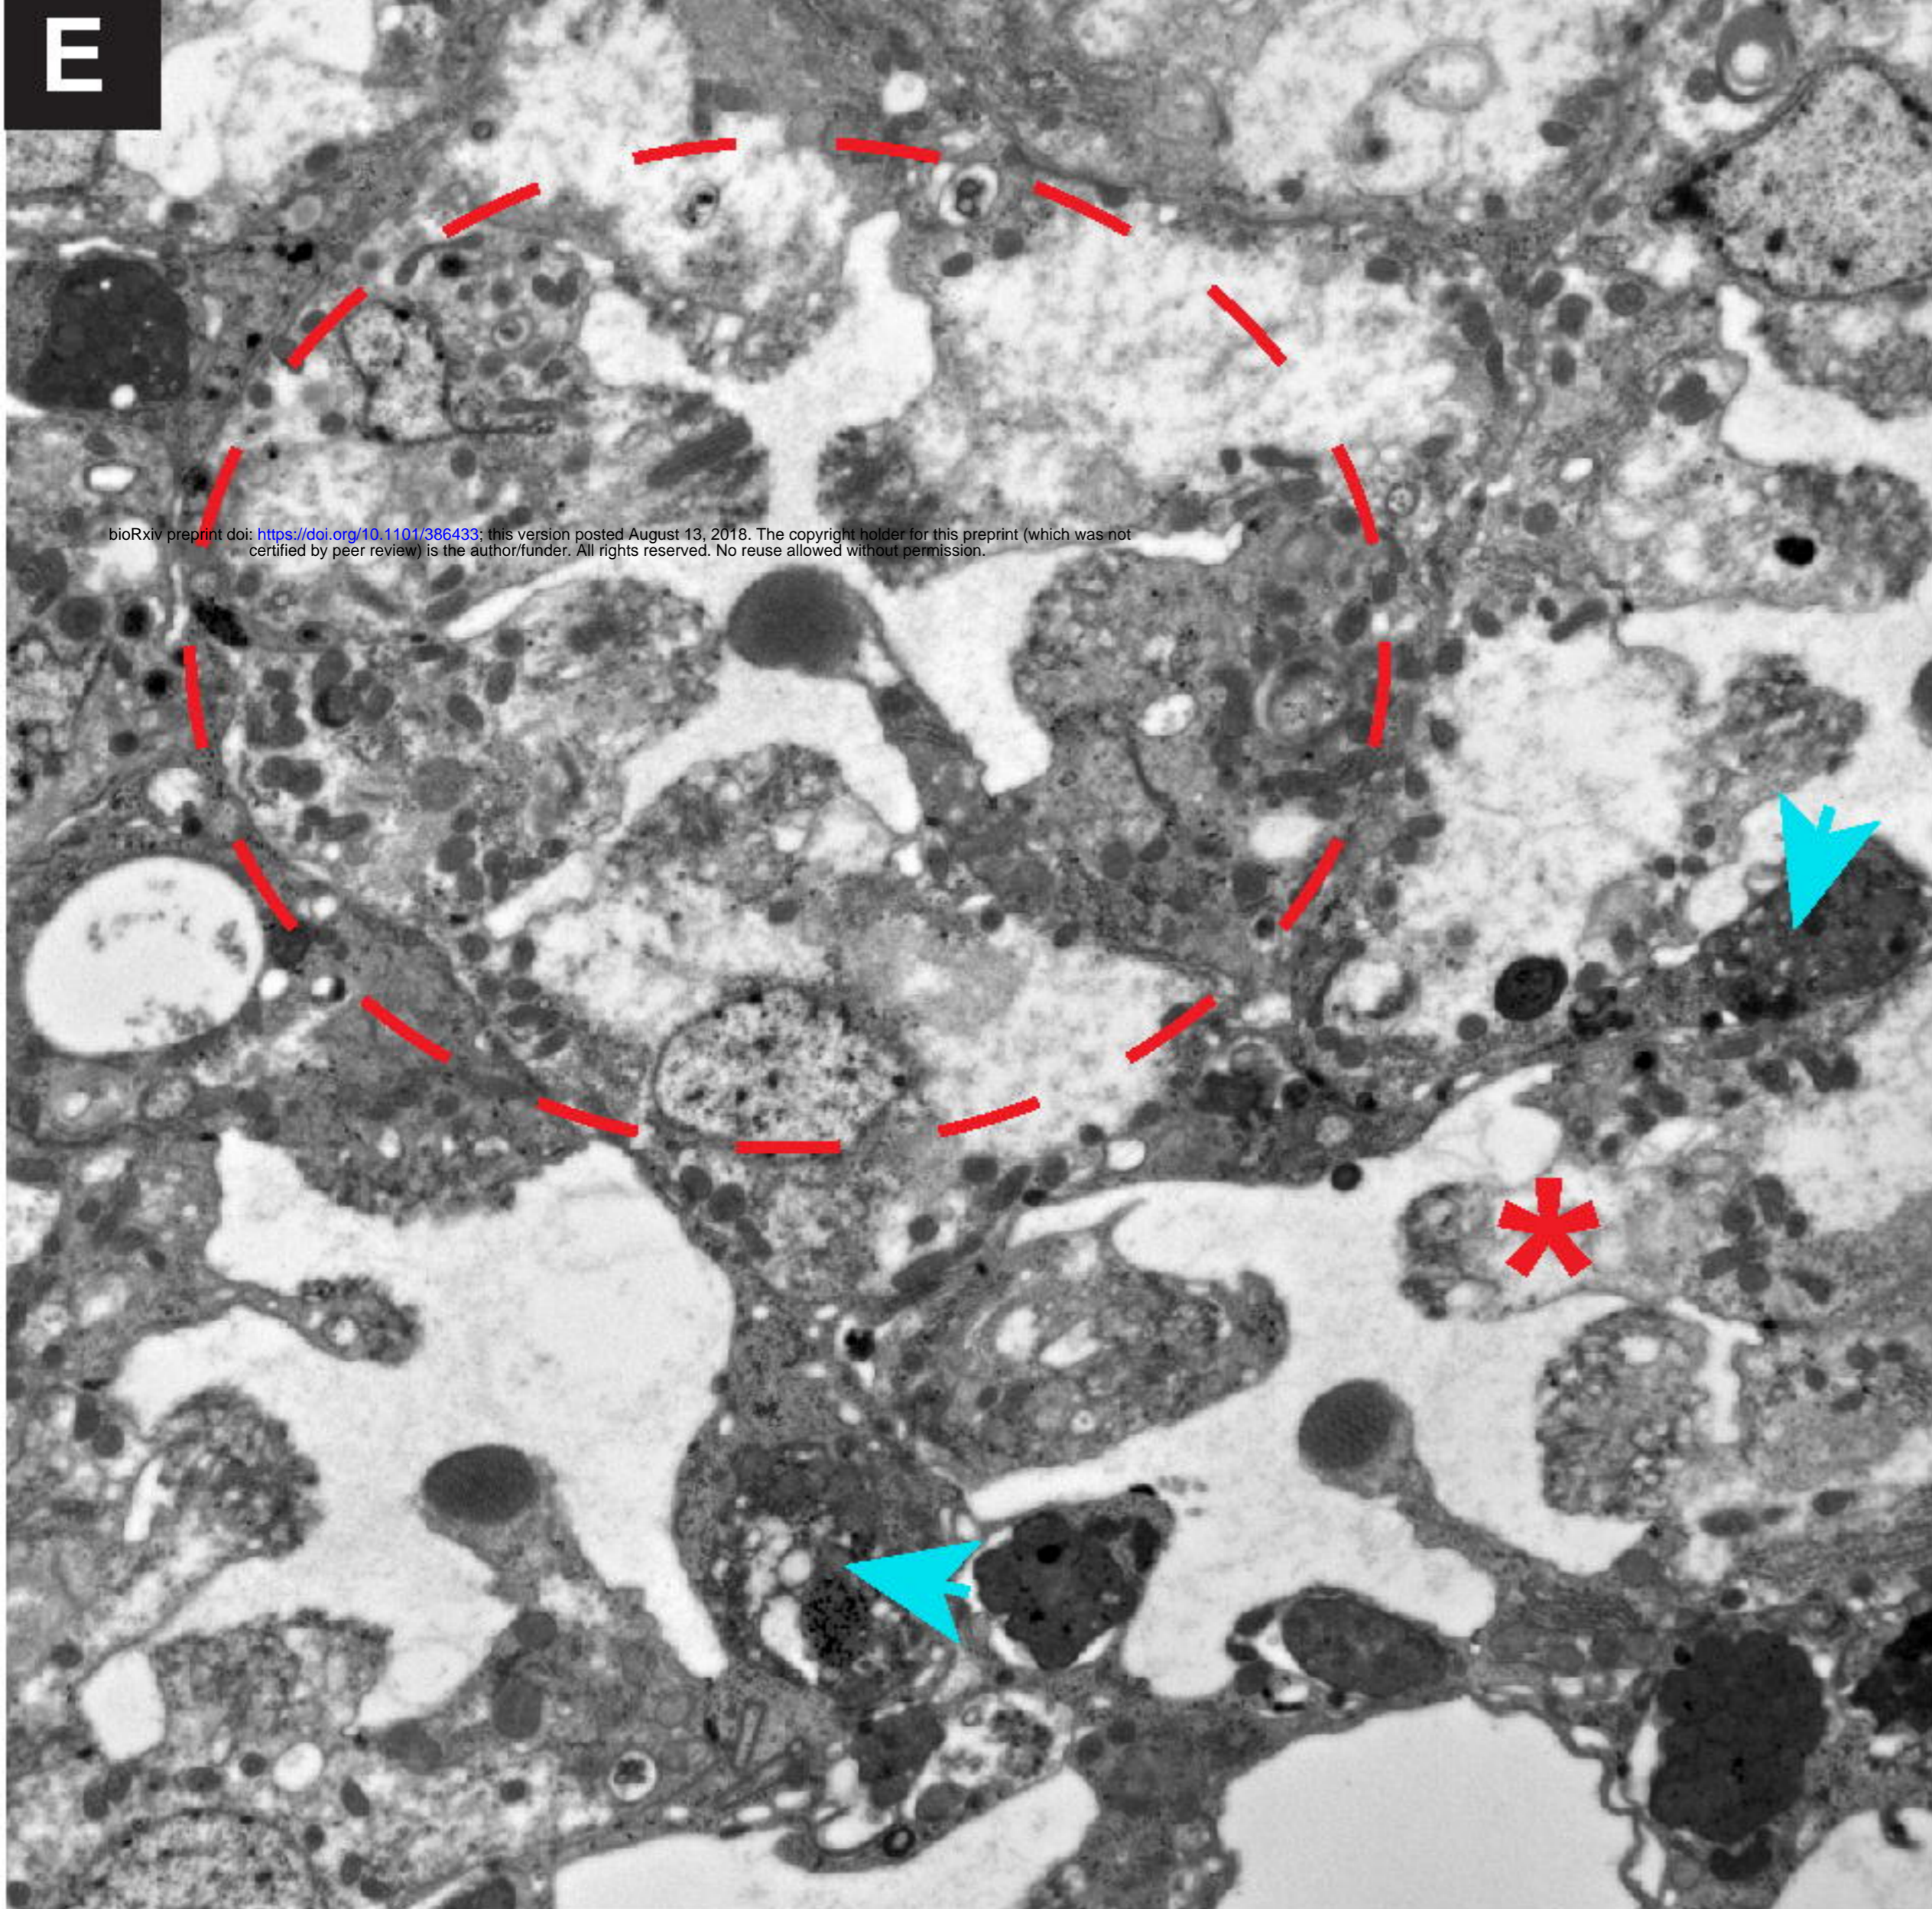

*w\*;;crb<sup>p13A9</sup>*

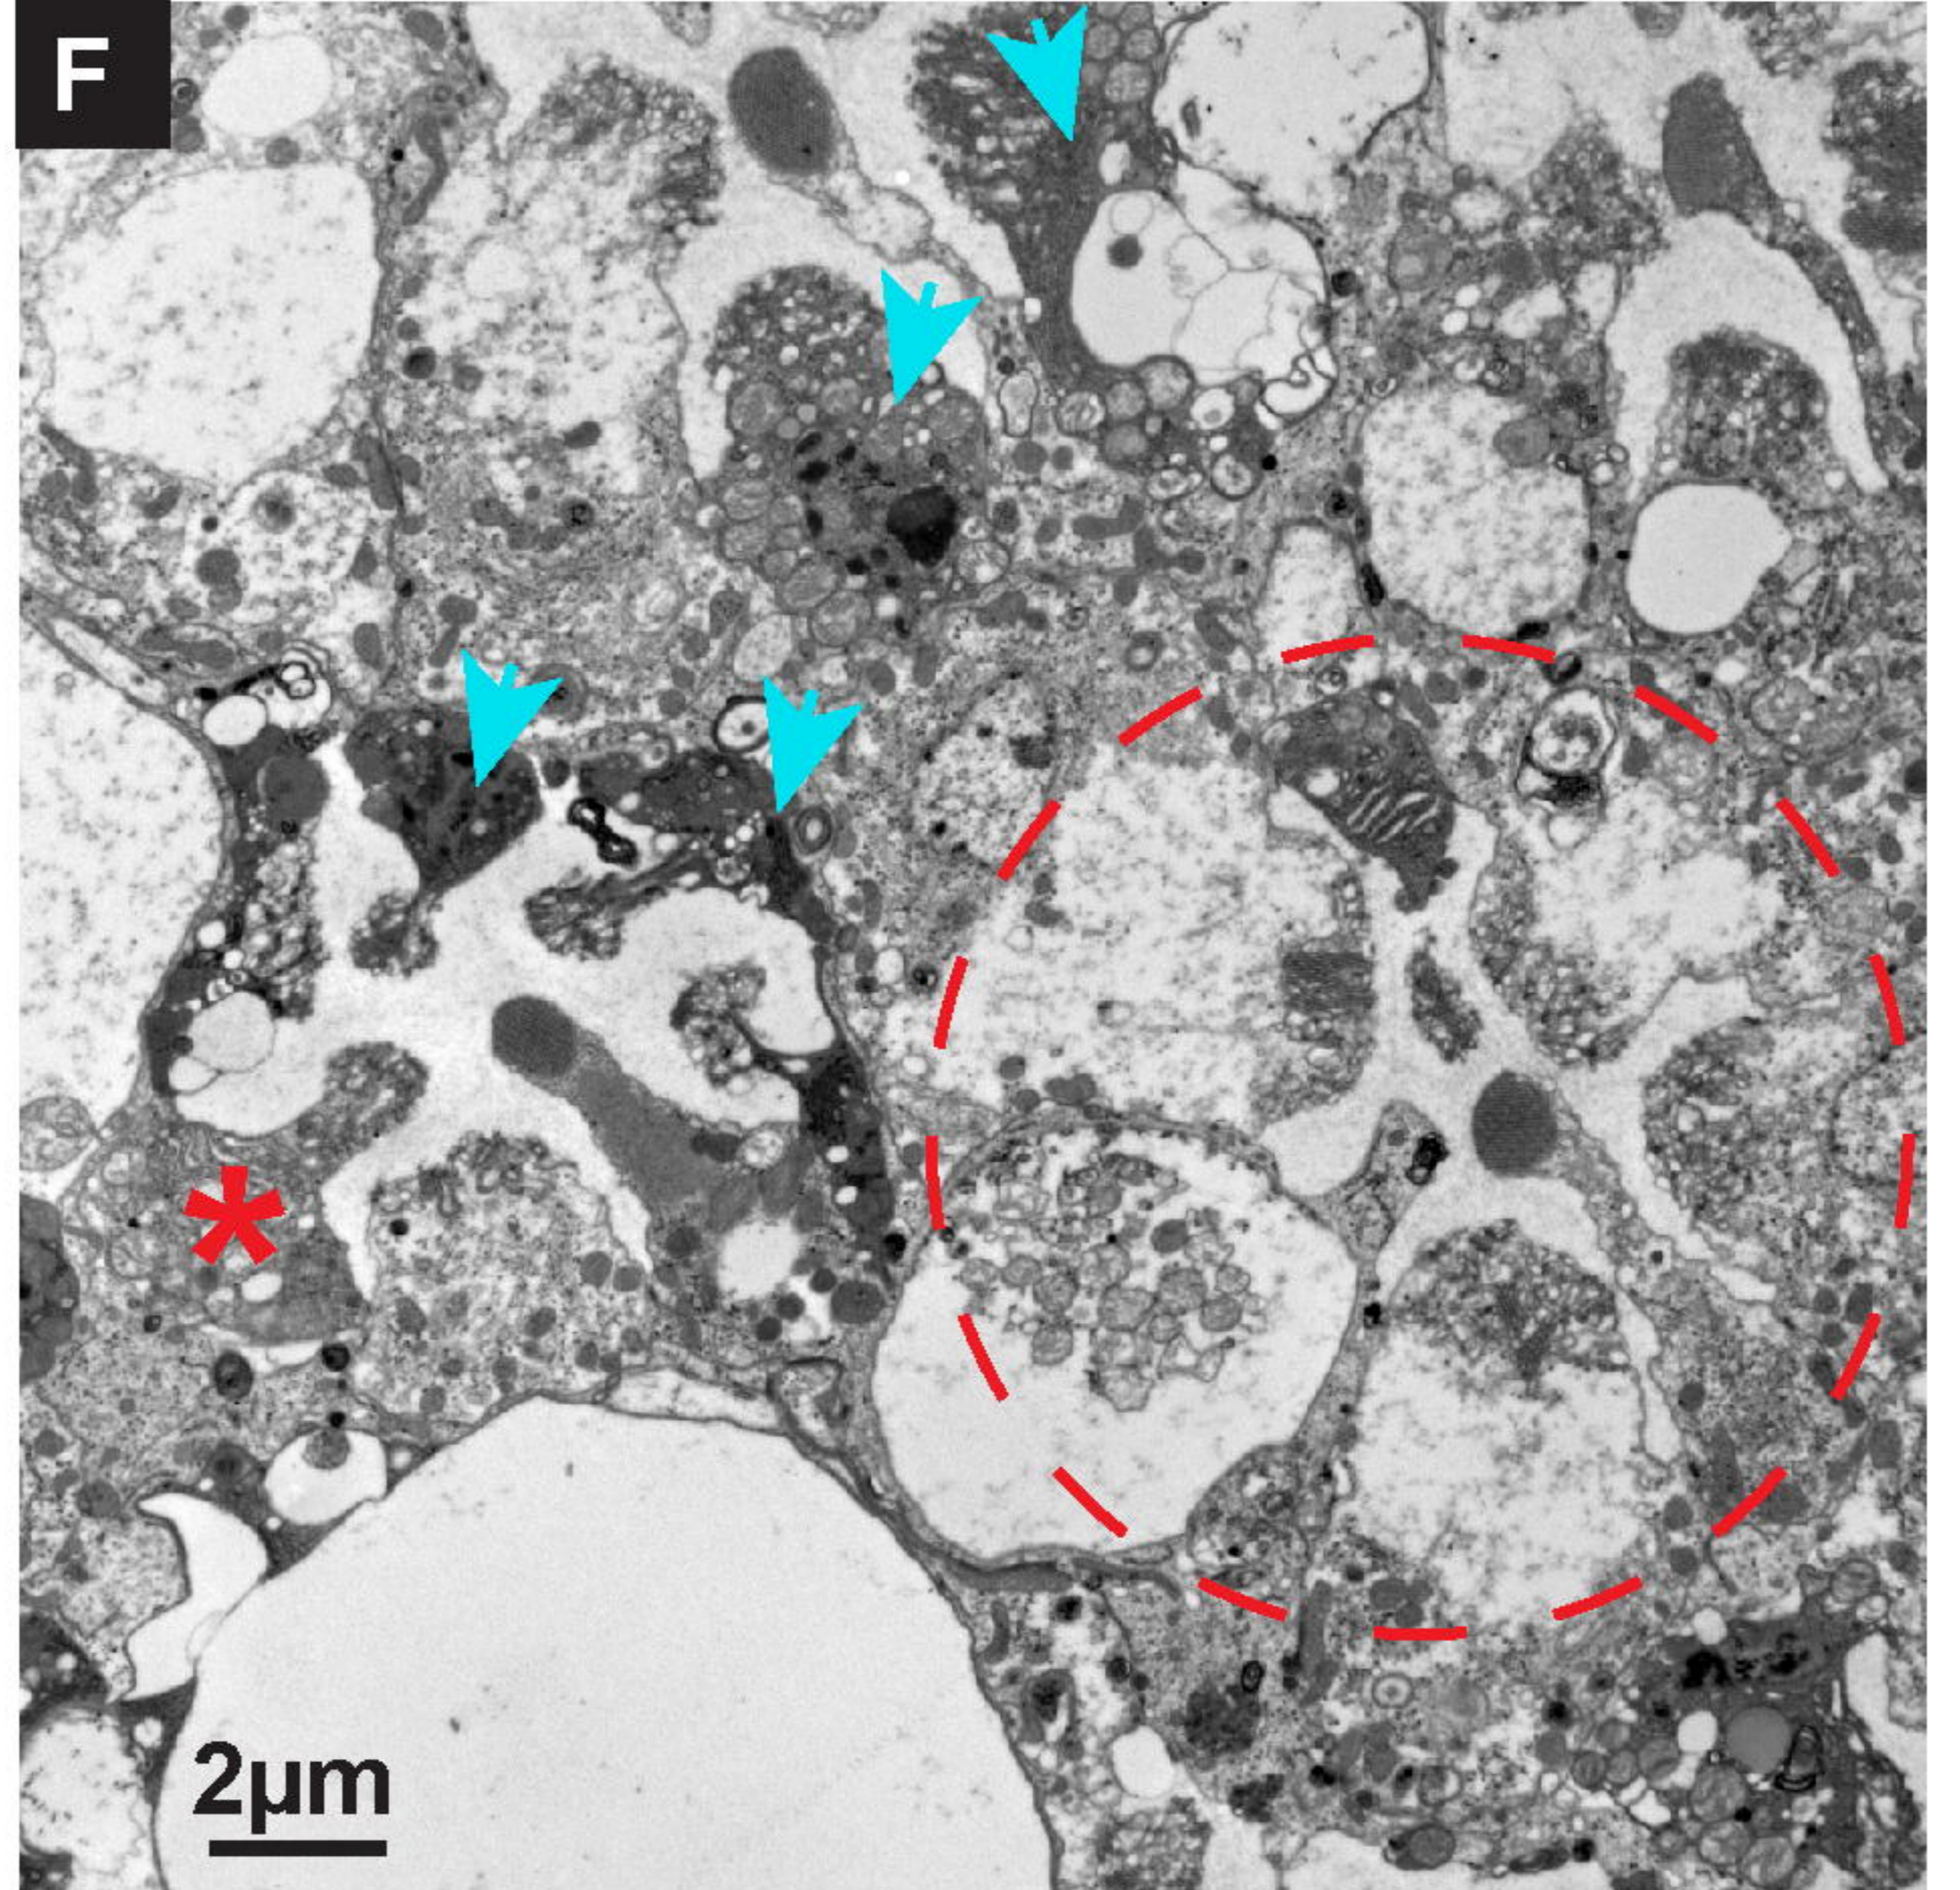

**Figure 6**



*w\*;;*

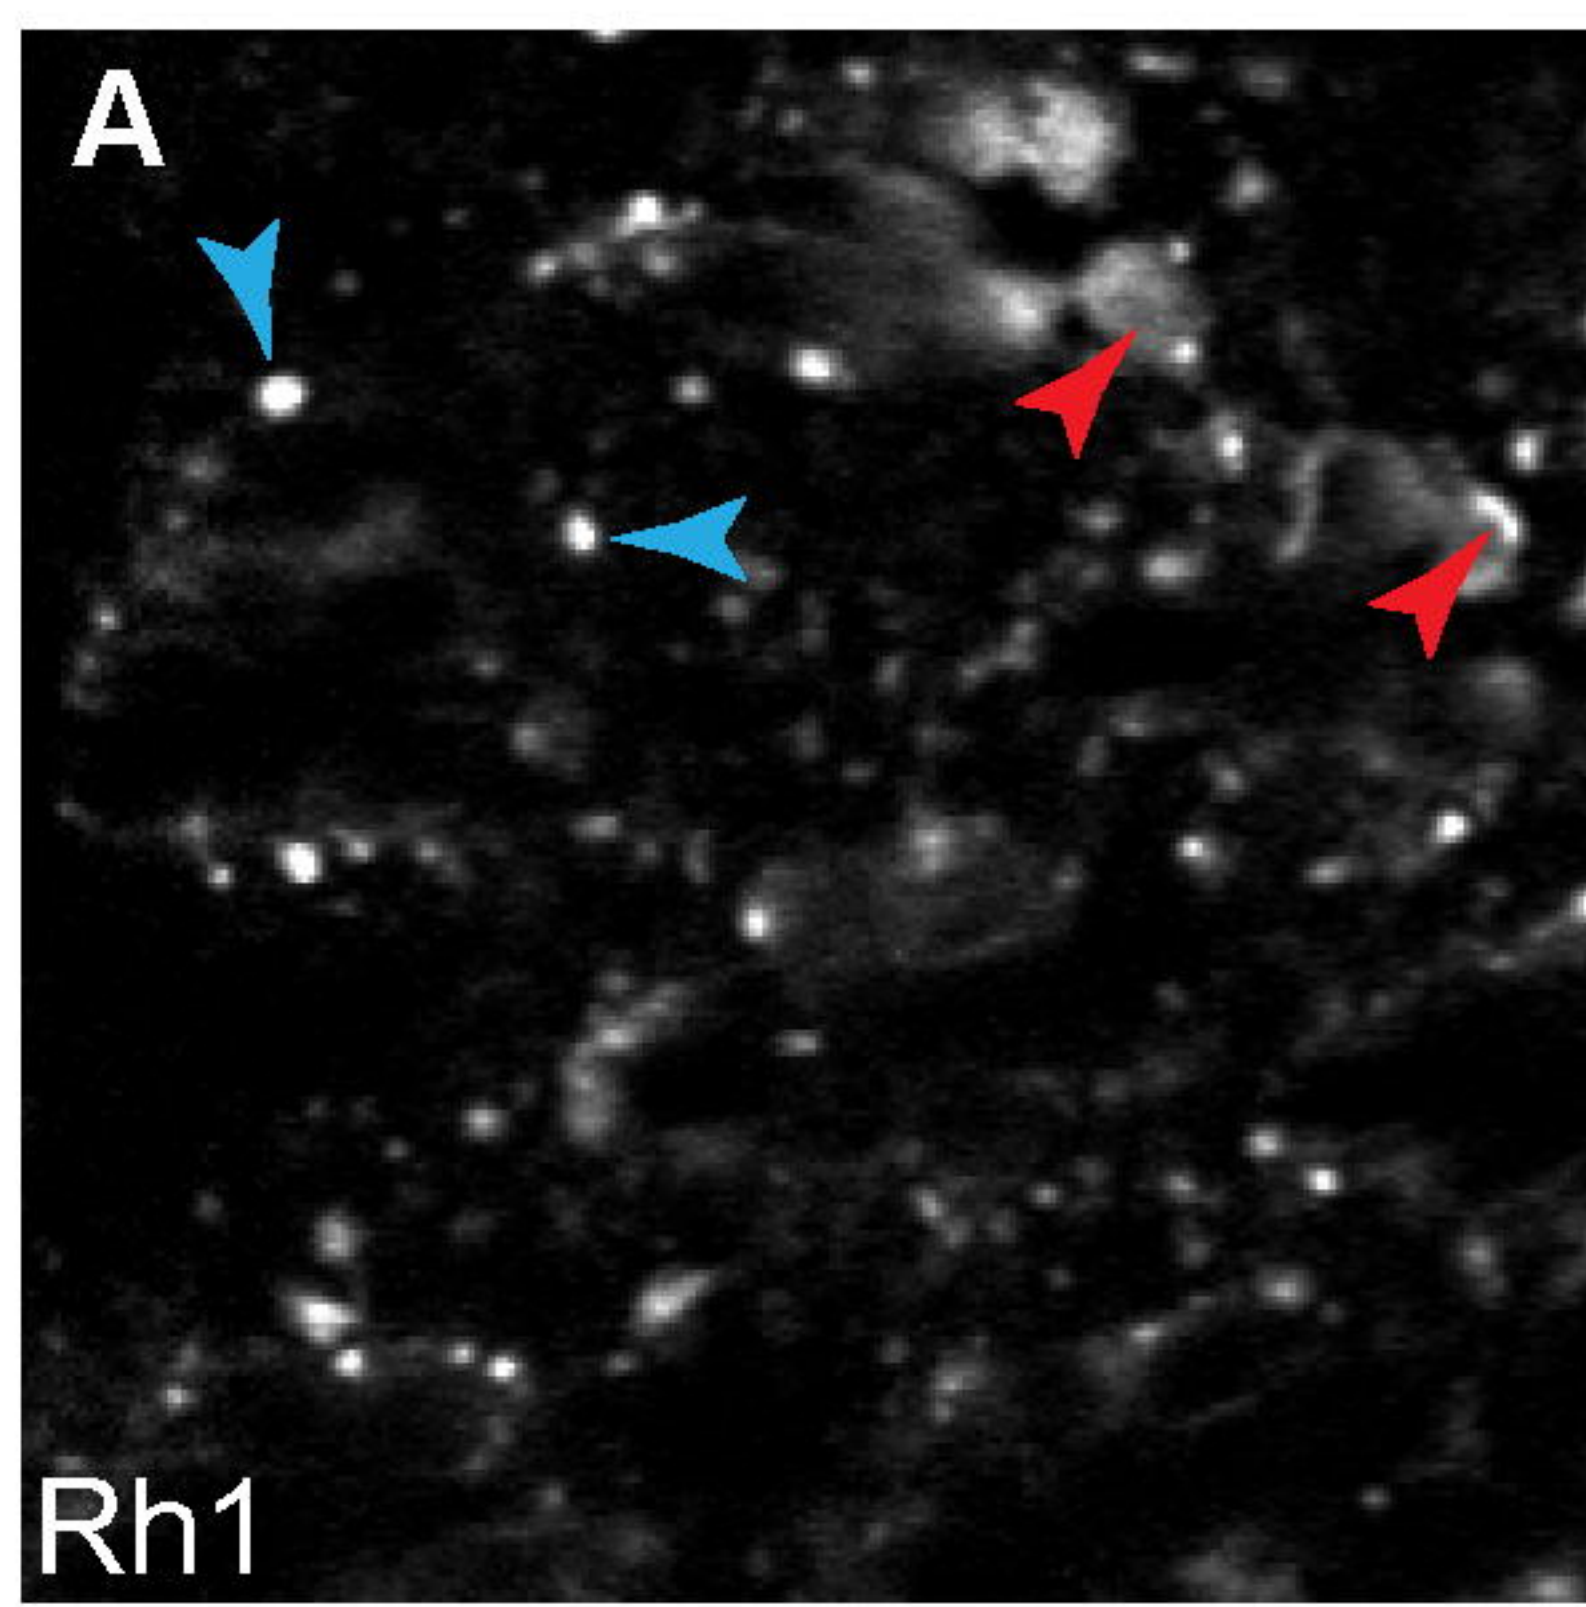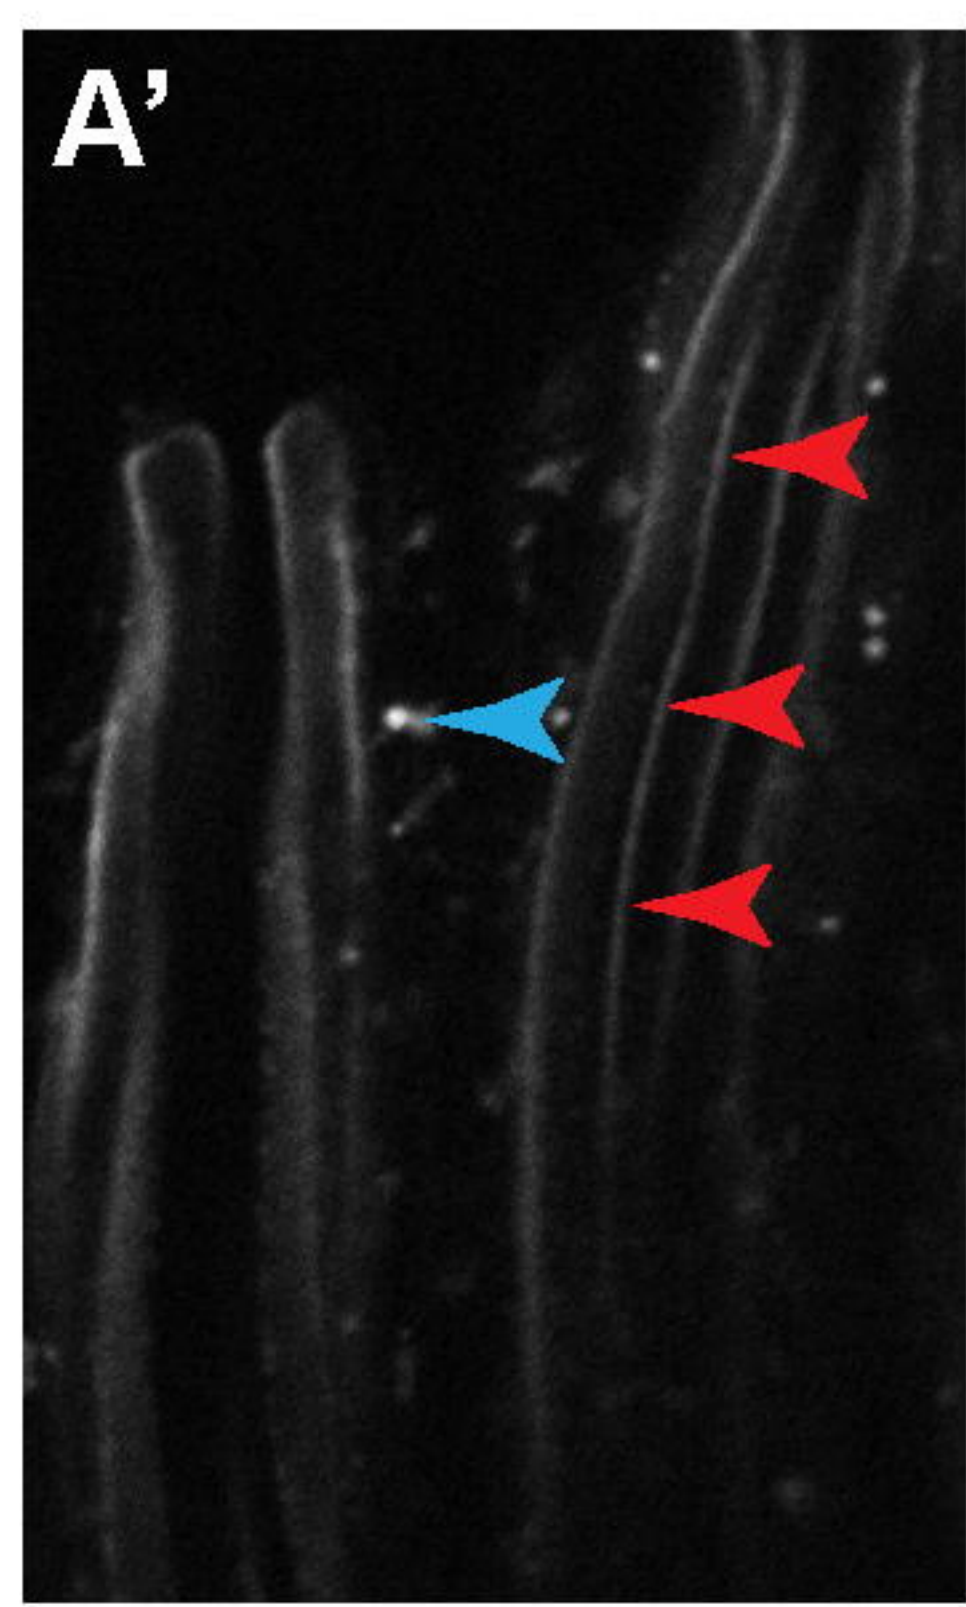

*cn, bw*

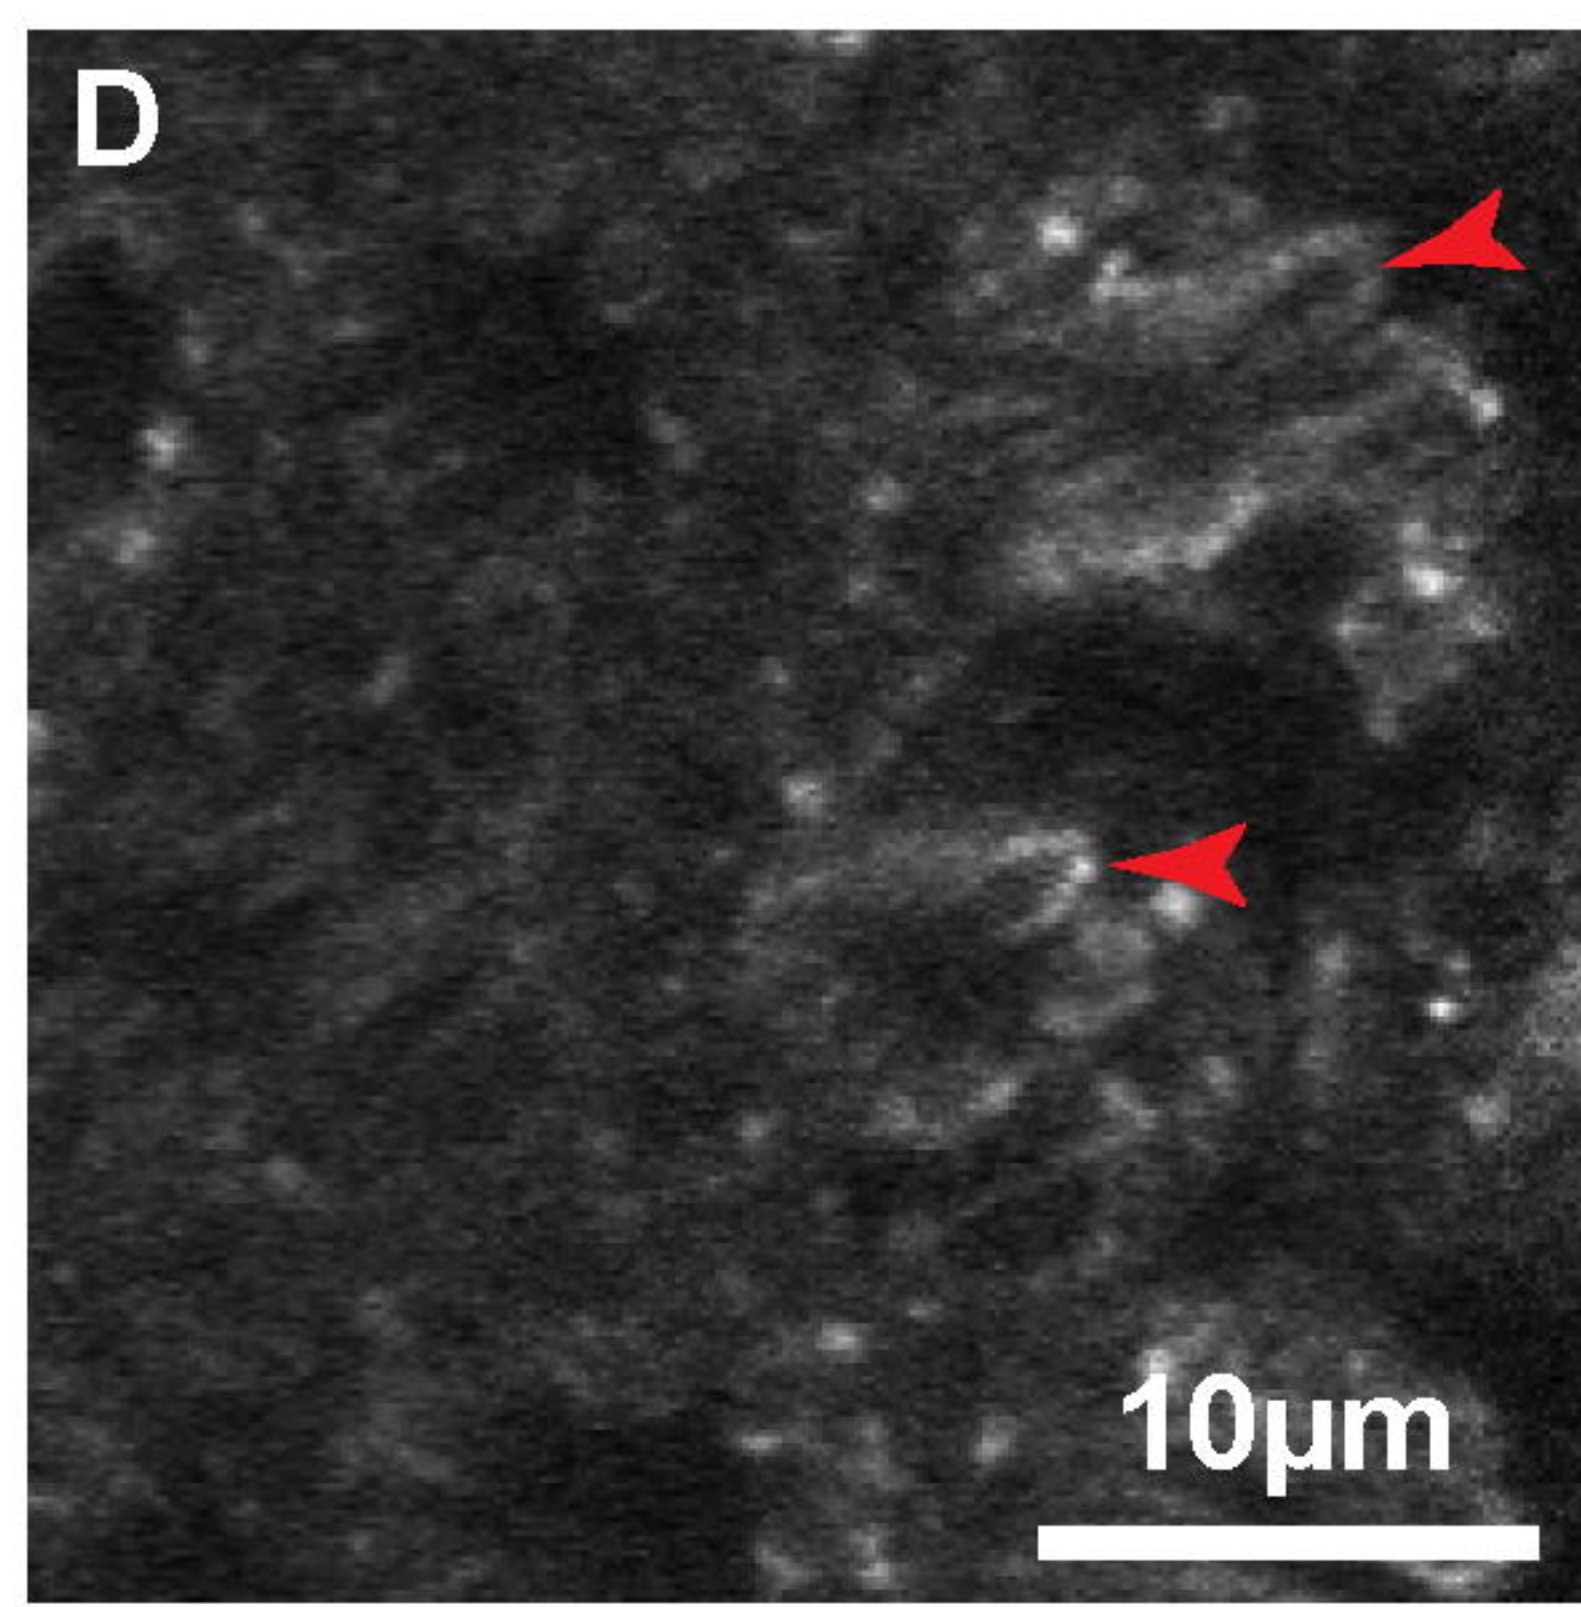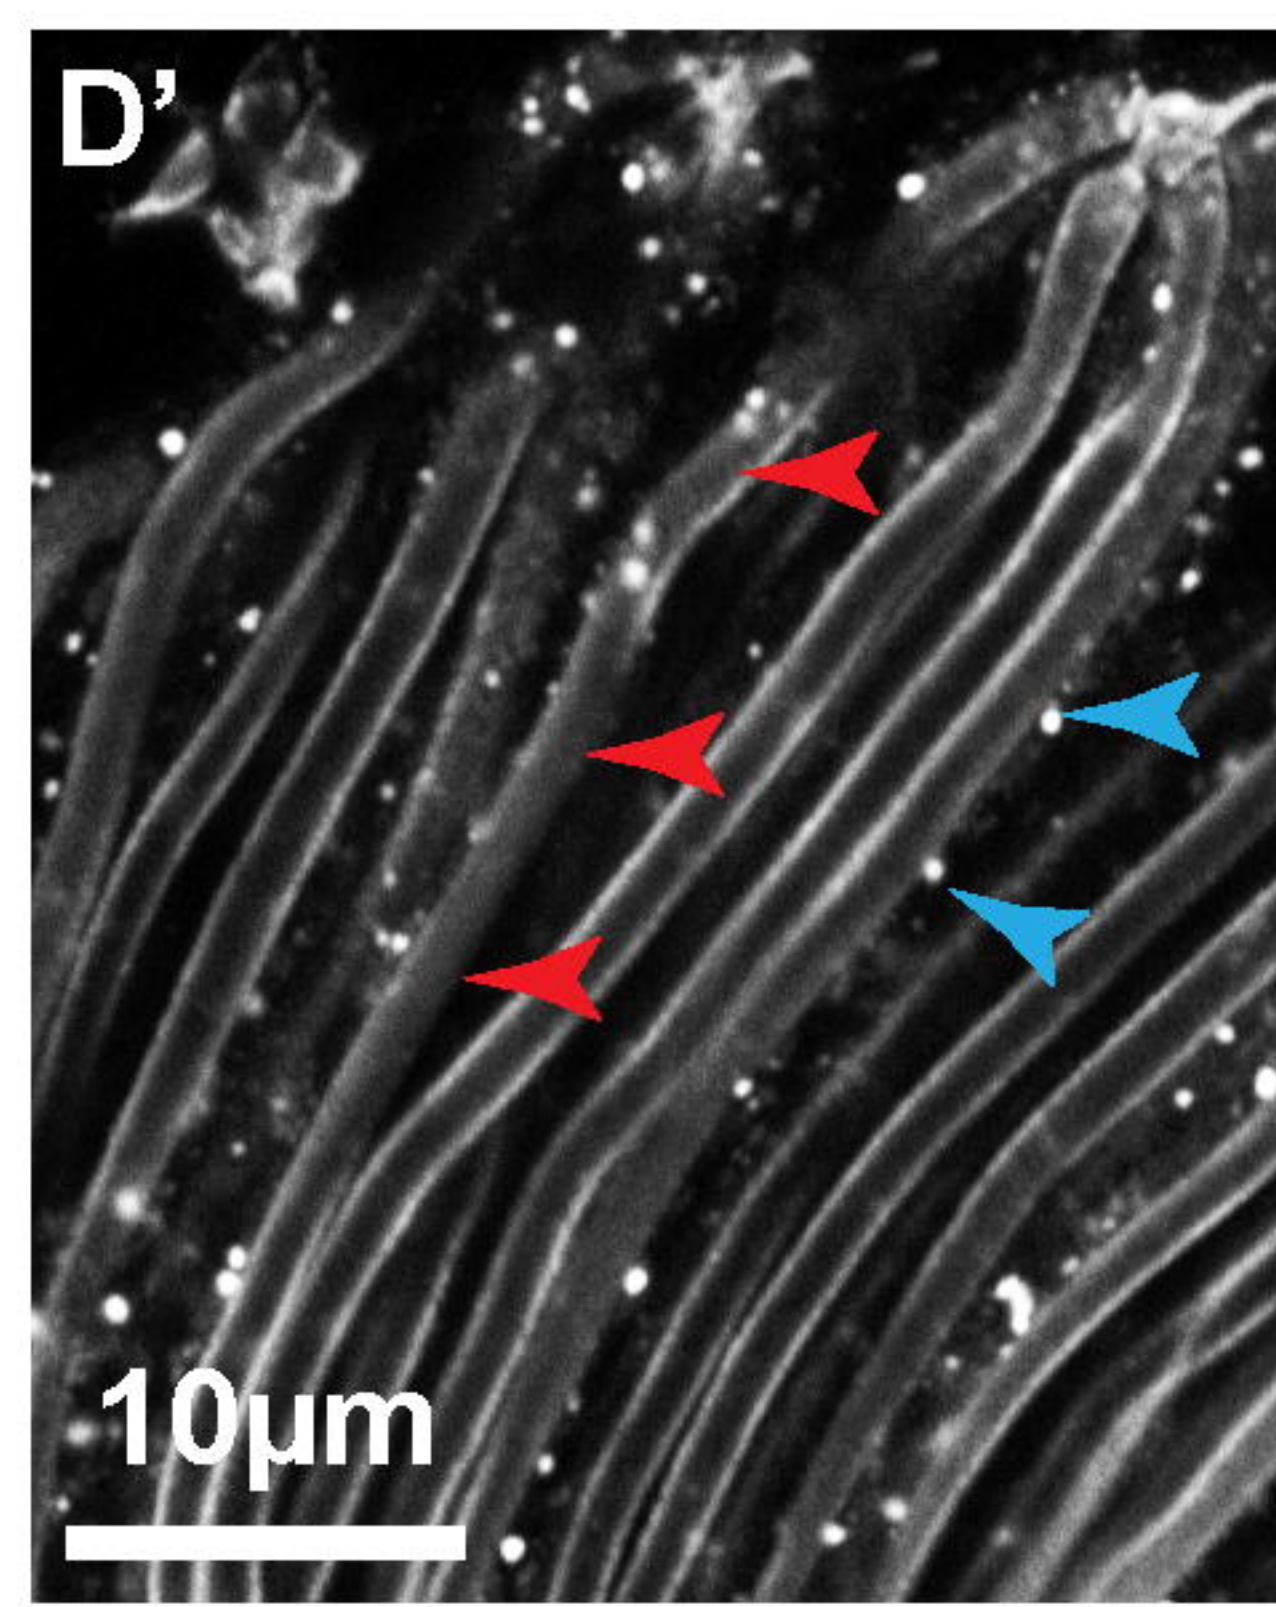

*w\*;;st<sup>1</sup>/+*

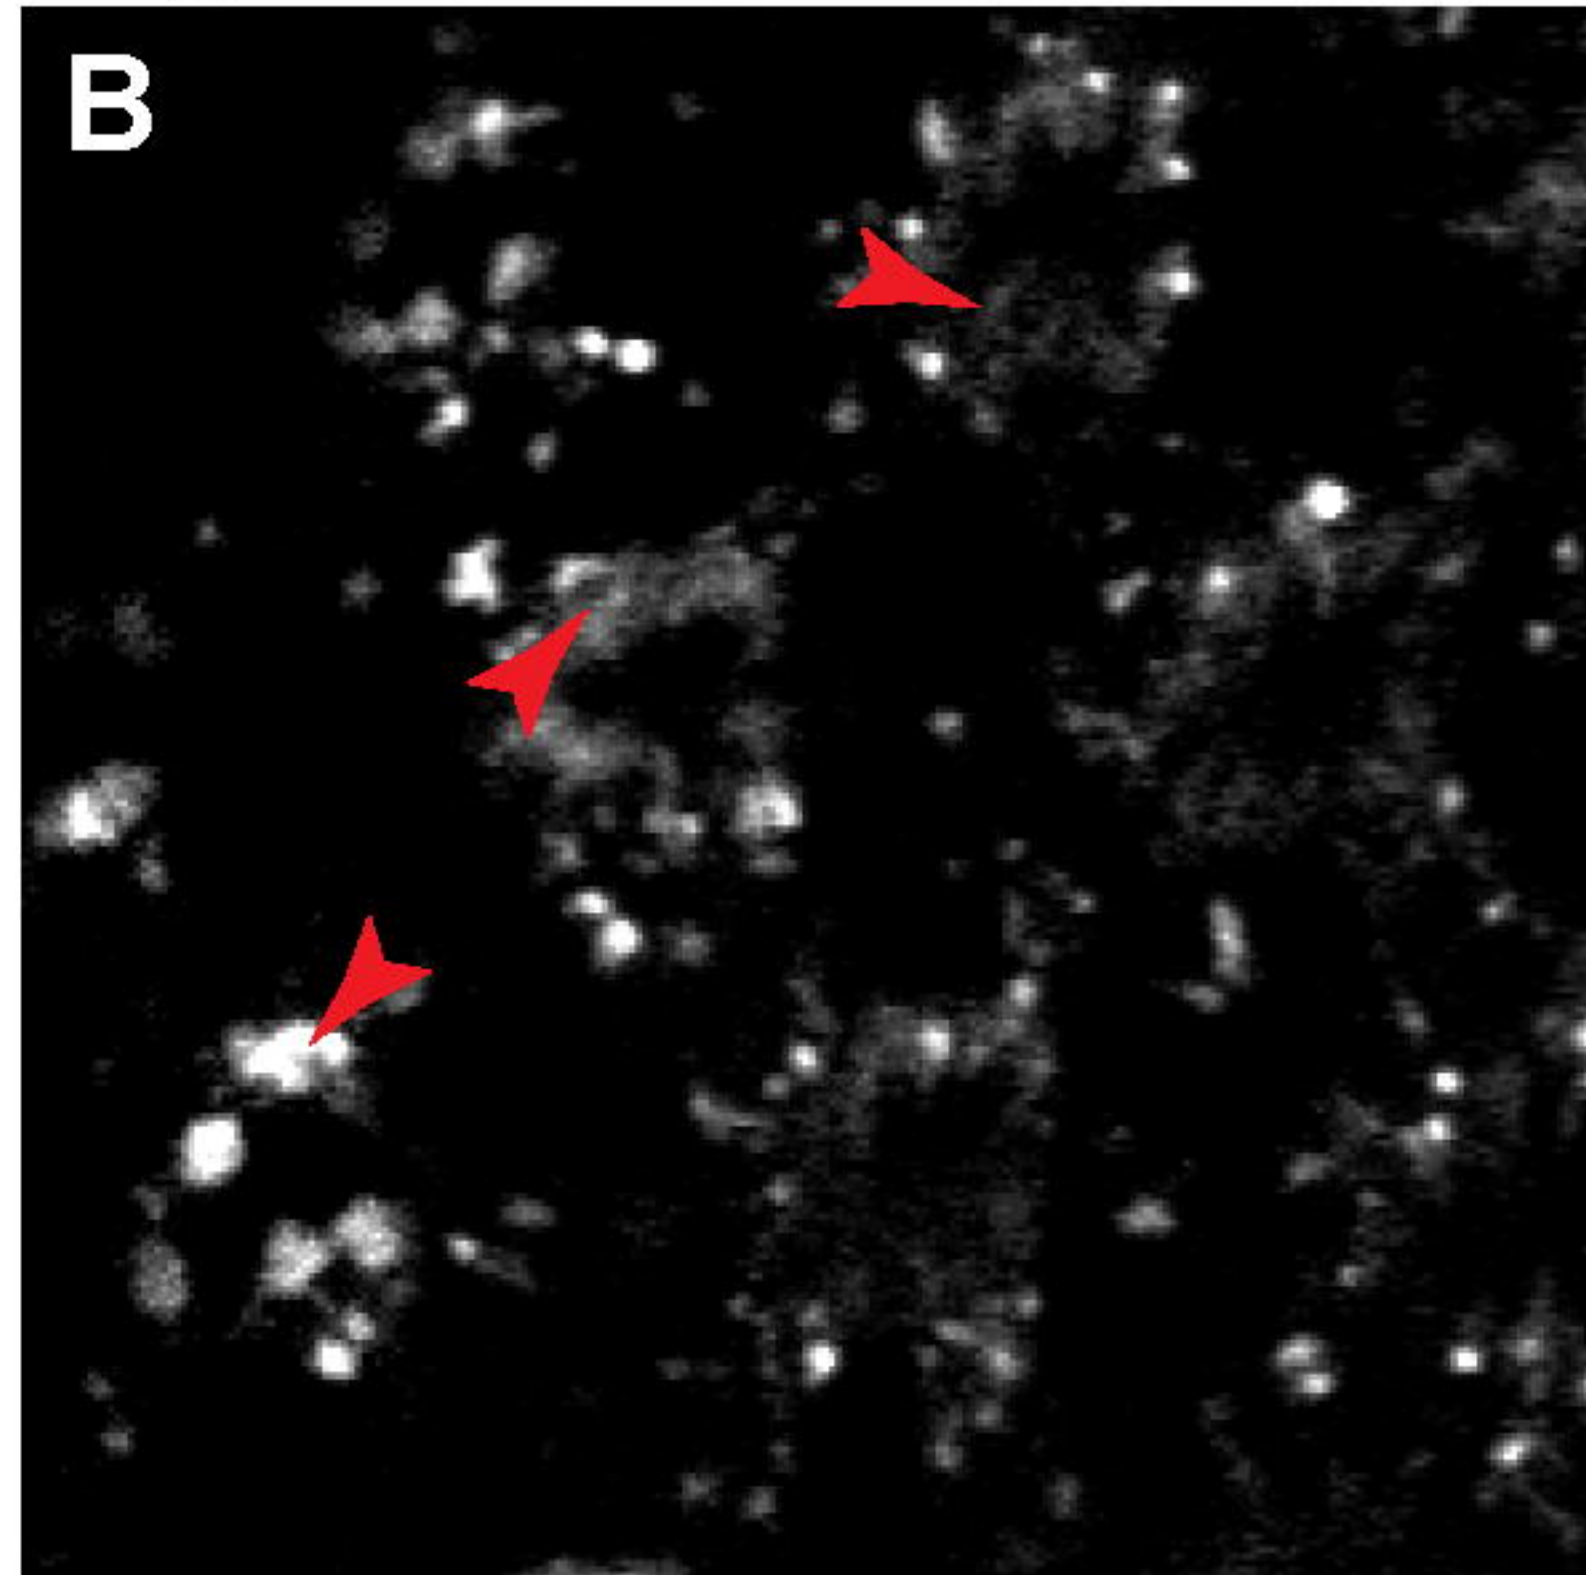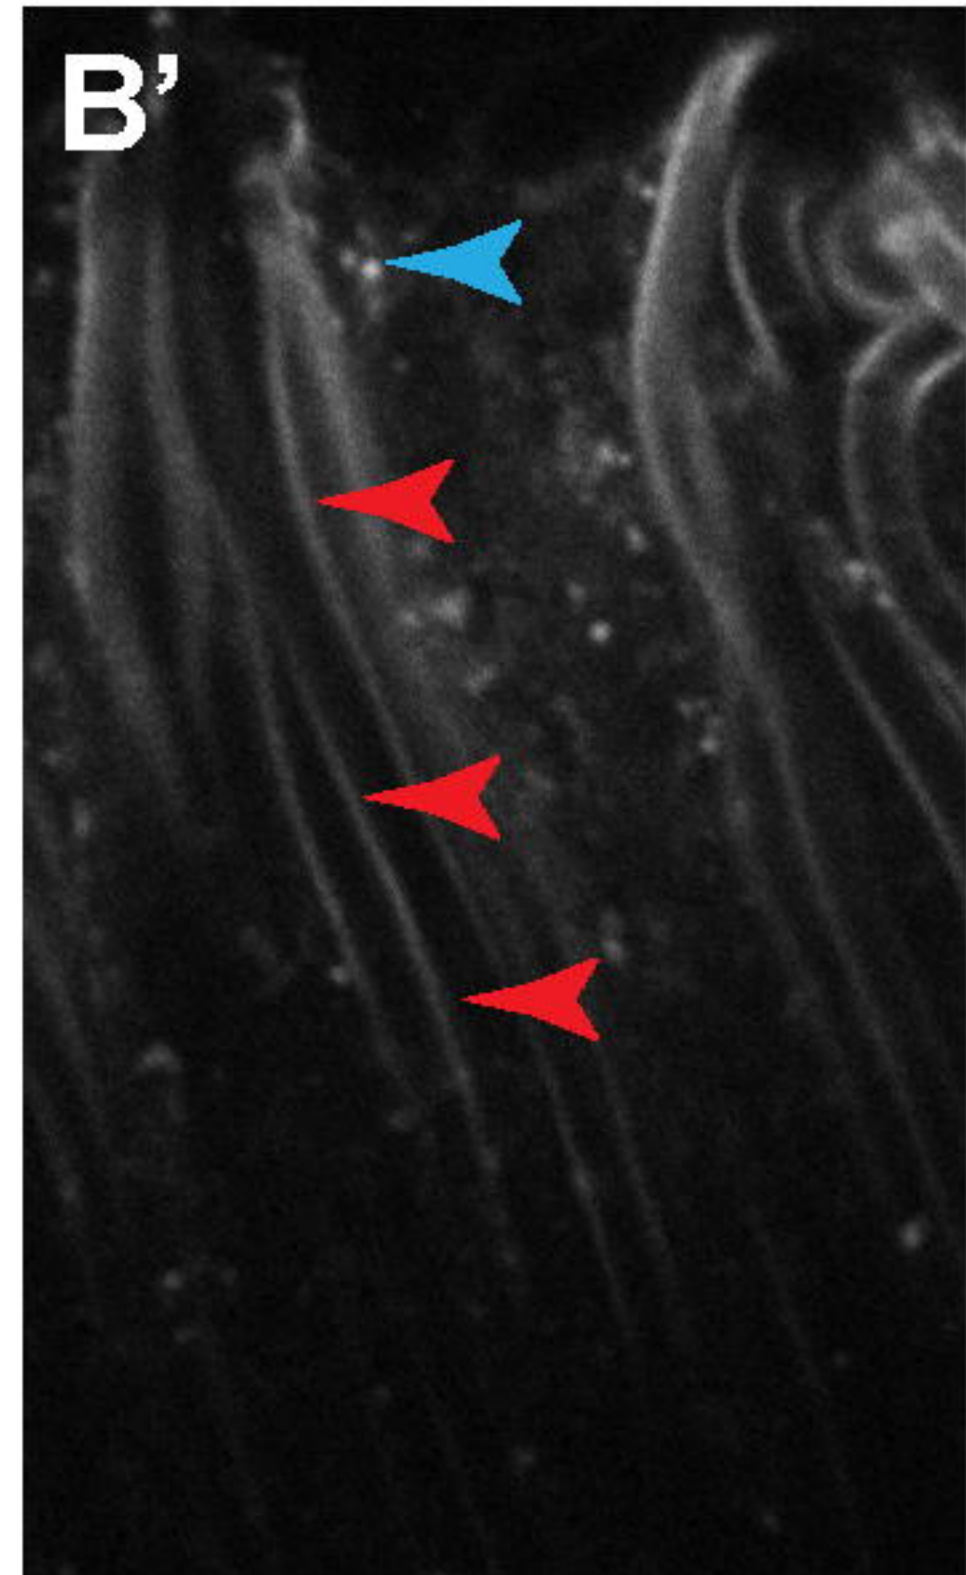

*cn, bw;Df (3L) 218/+*

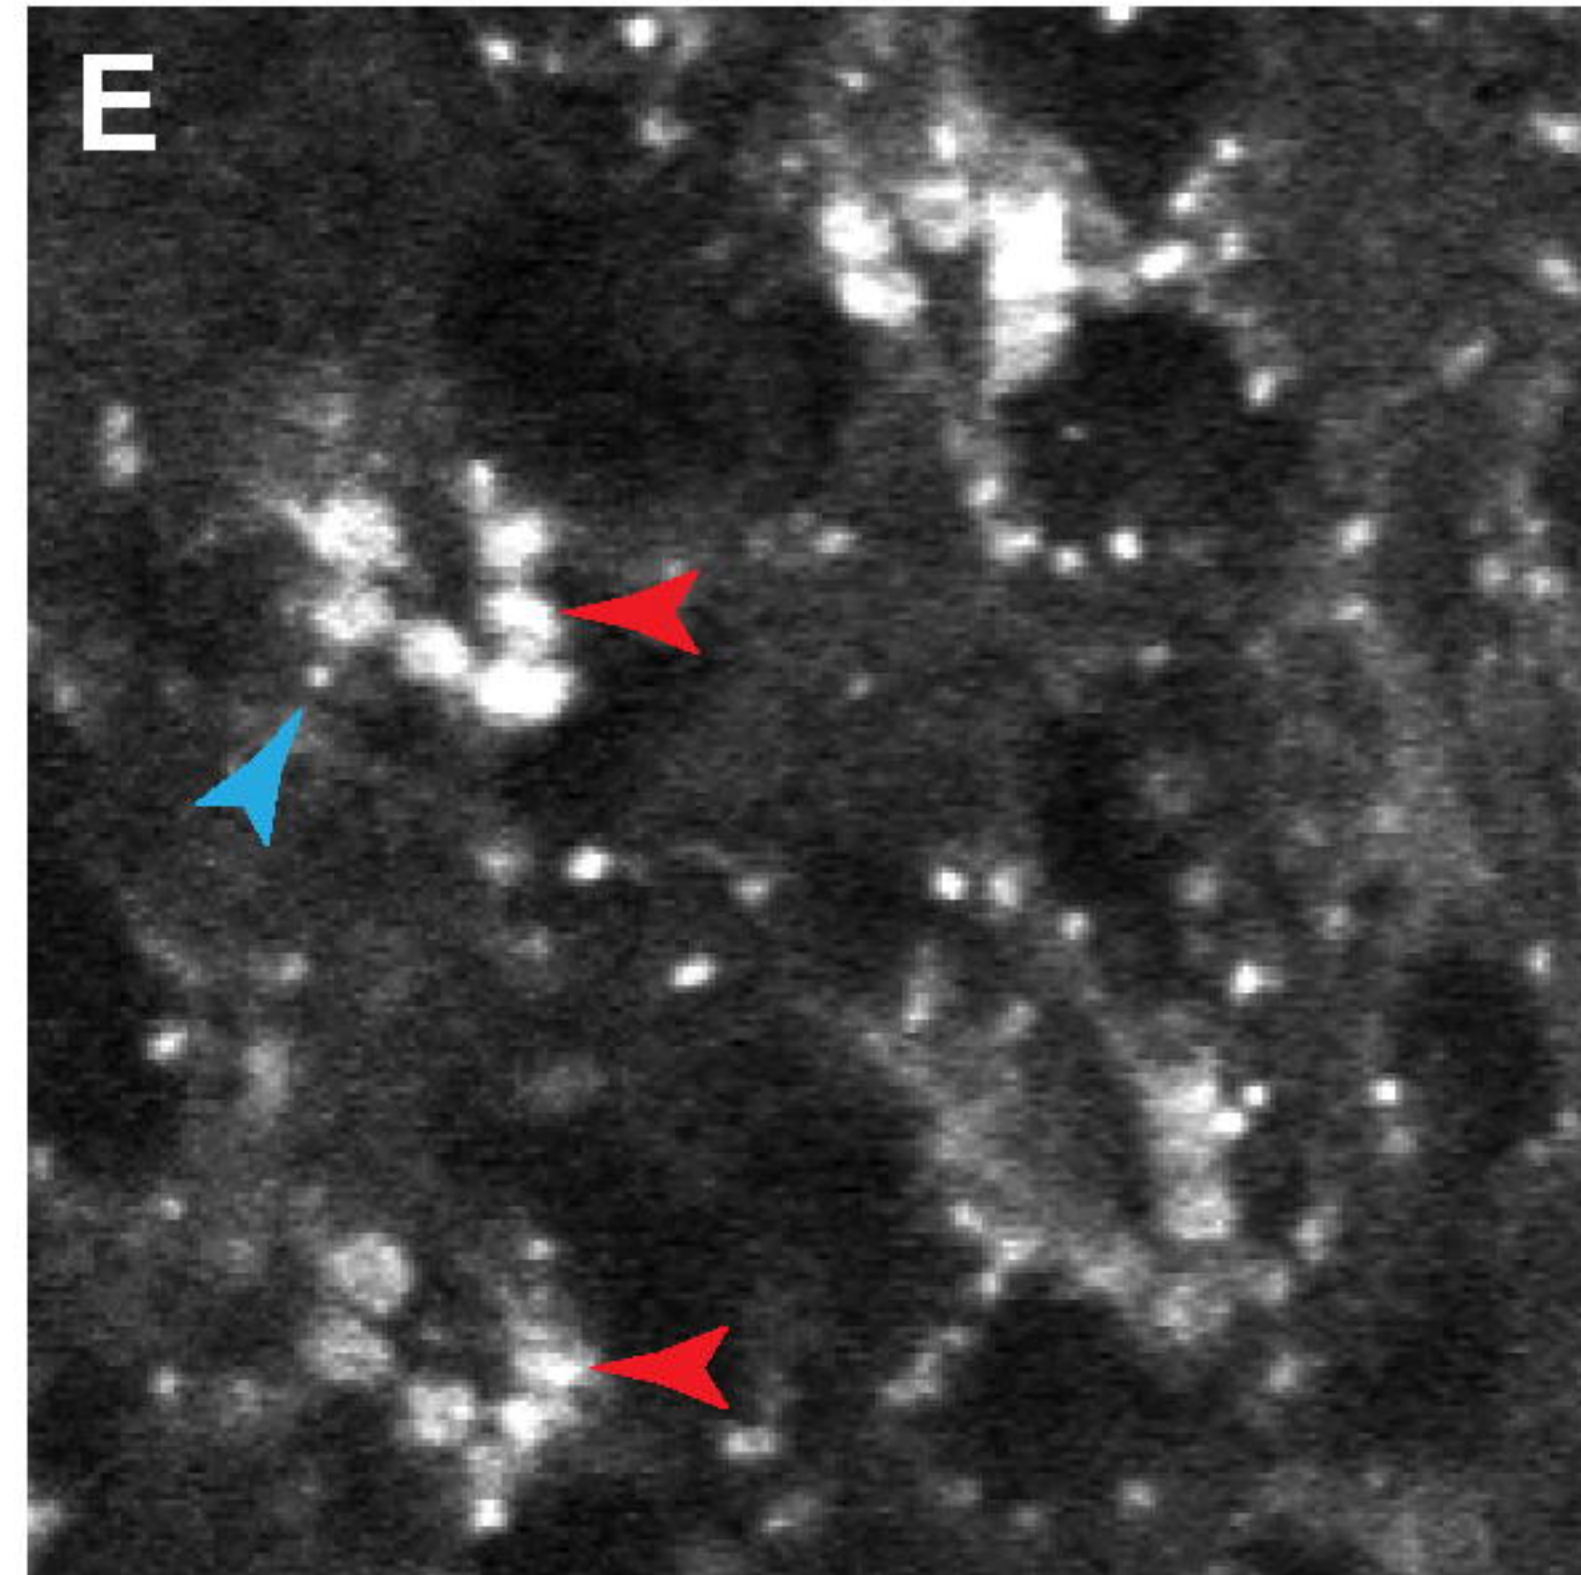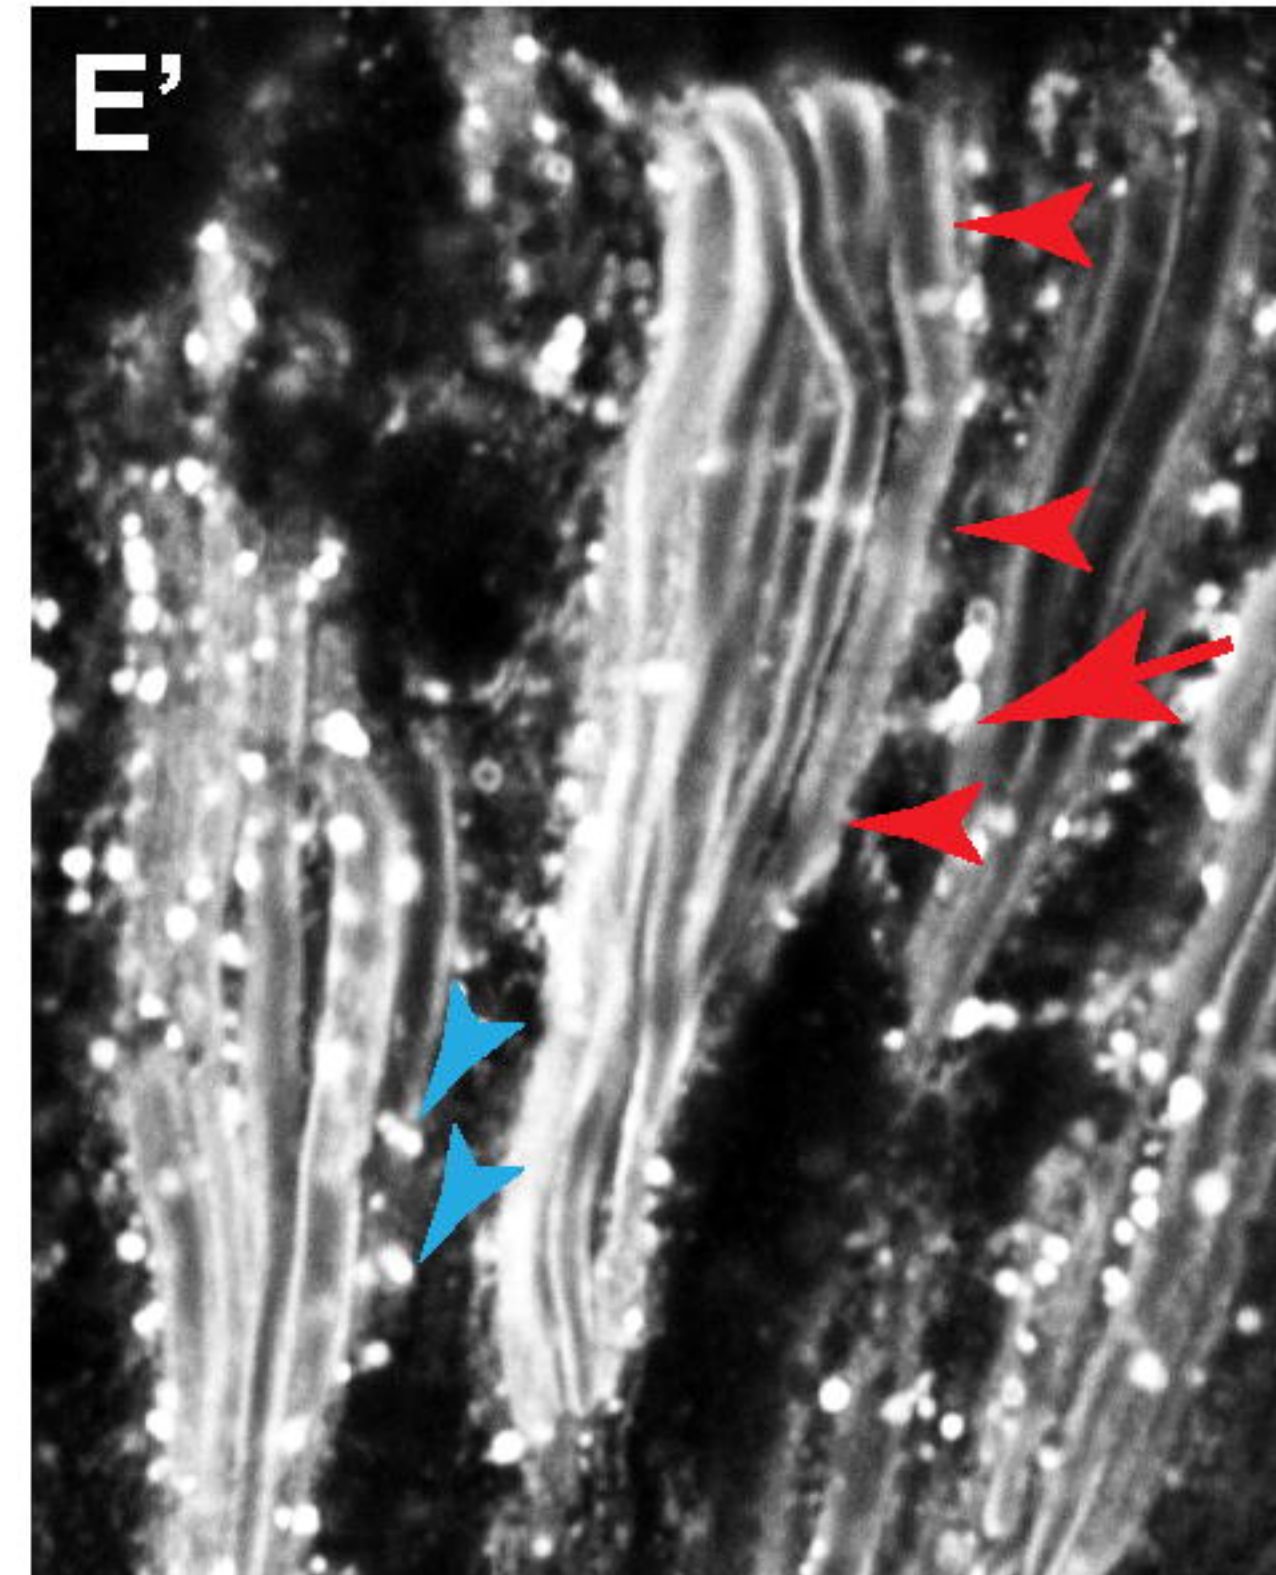

*w\*;;Prp31<sup>P18</sup>st<sup>1</sup>/+*

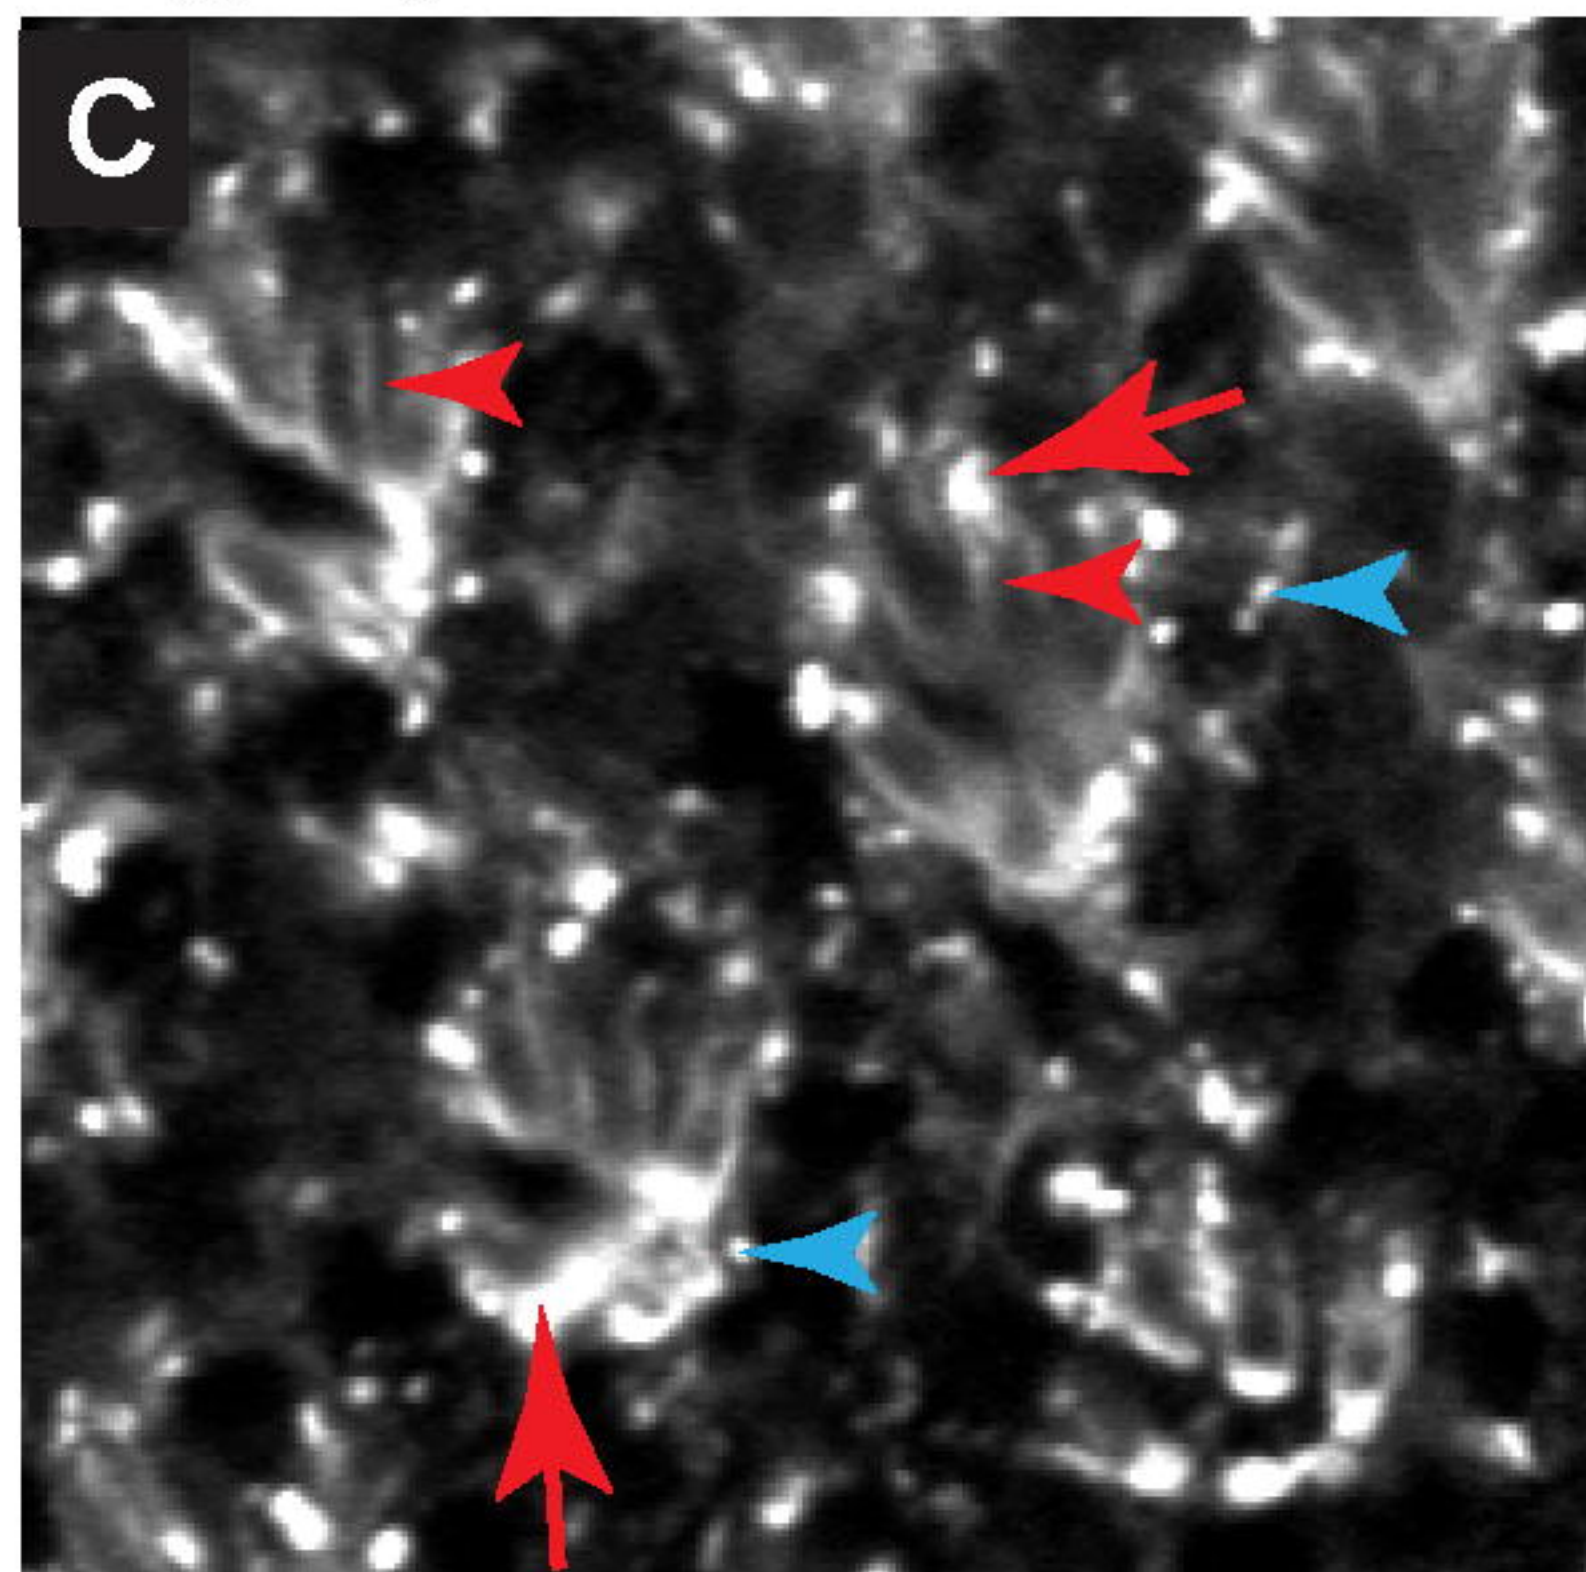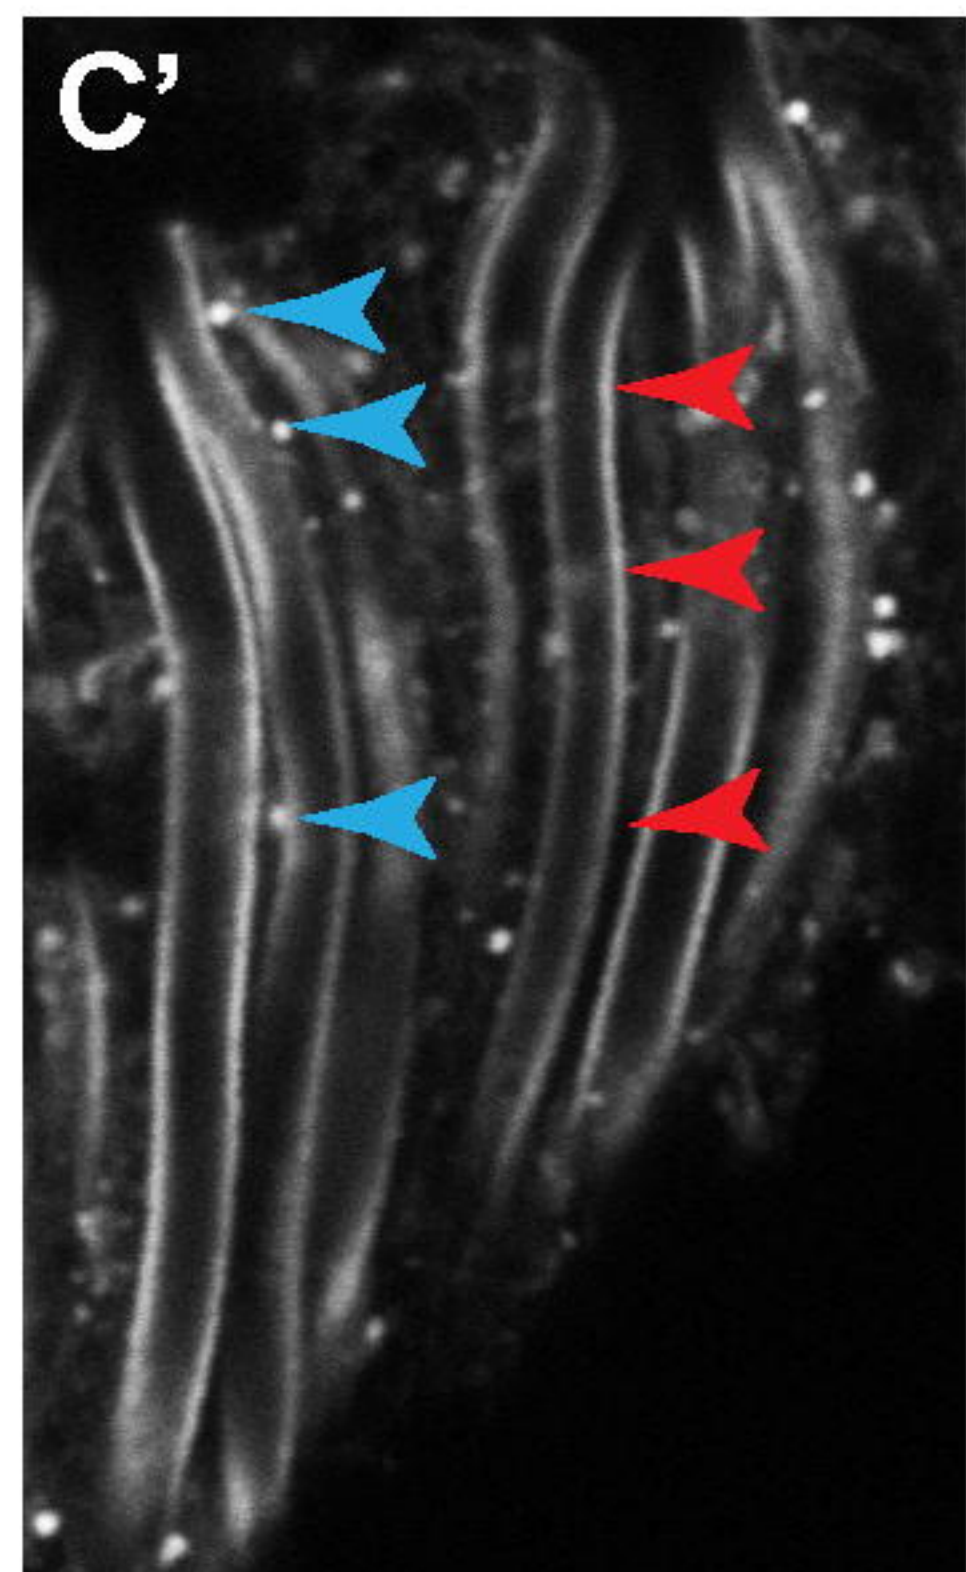

*GMR-w<sup>IR</sup>;Rh1-Gal4>UAS dicer*

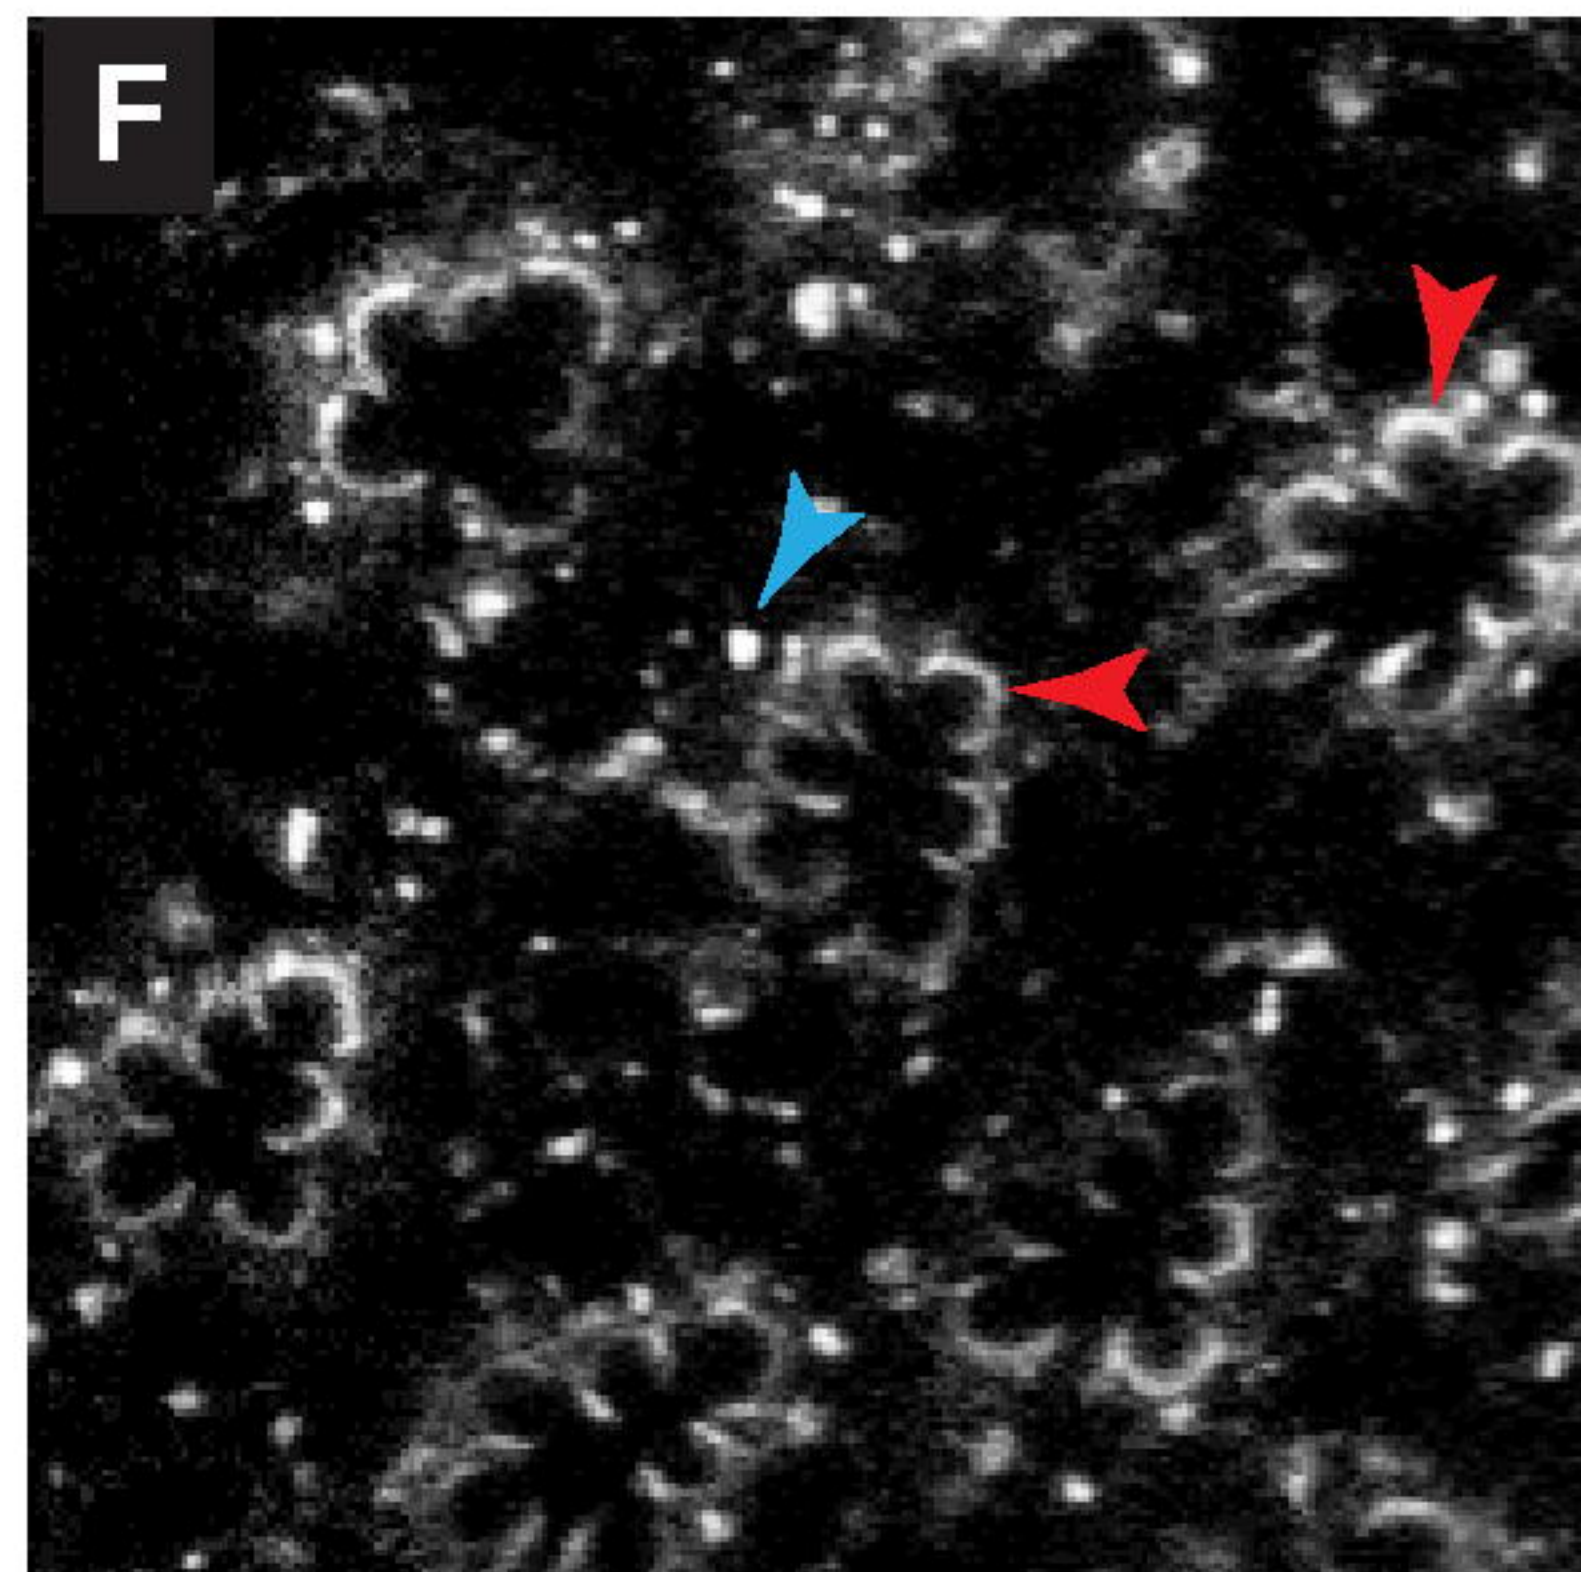

*GMR-w<sup>IR</sup>;Rh1-Gal4>UAS dicer + UASPrp31RNAi*

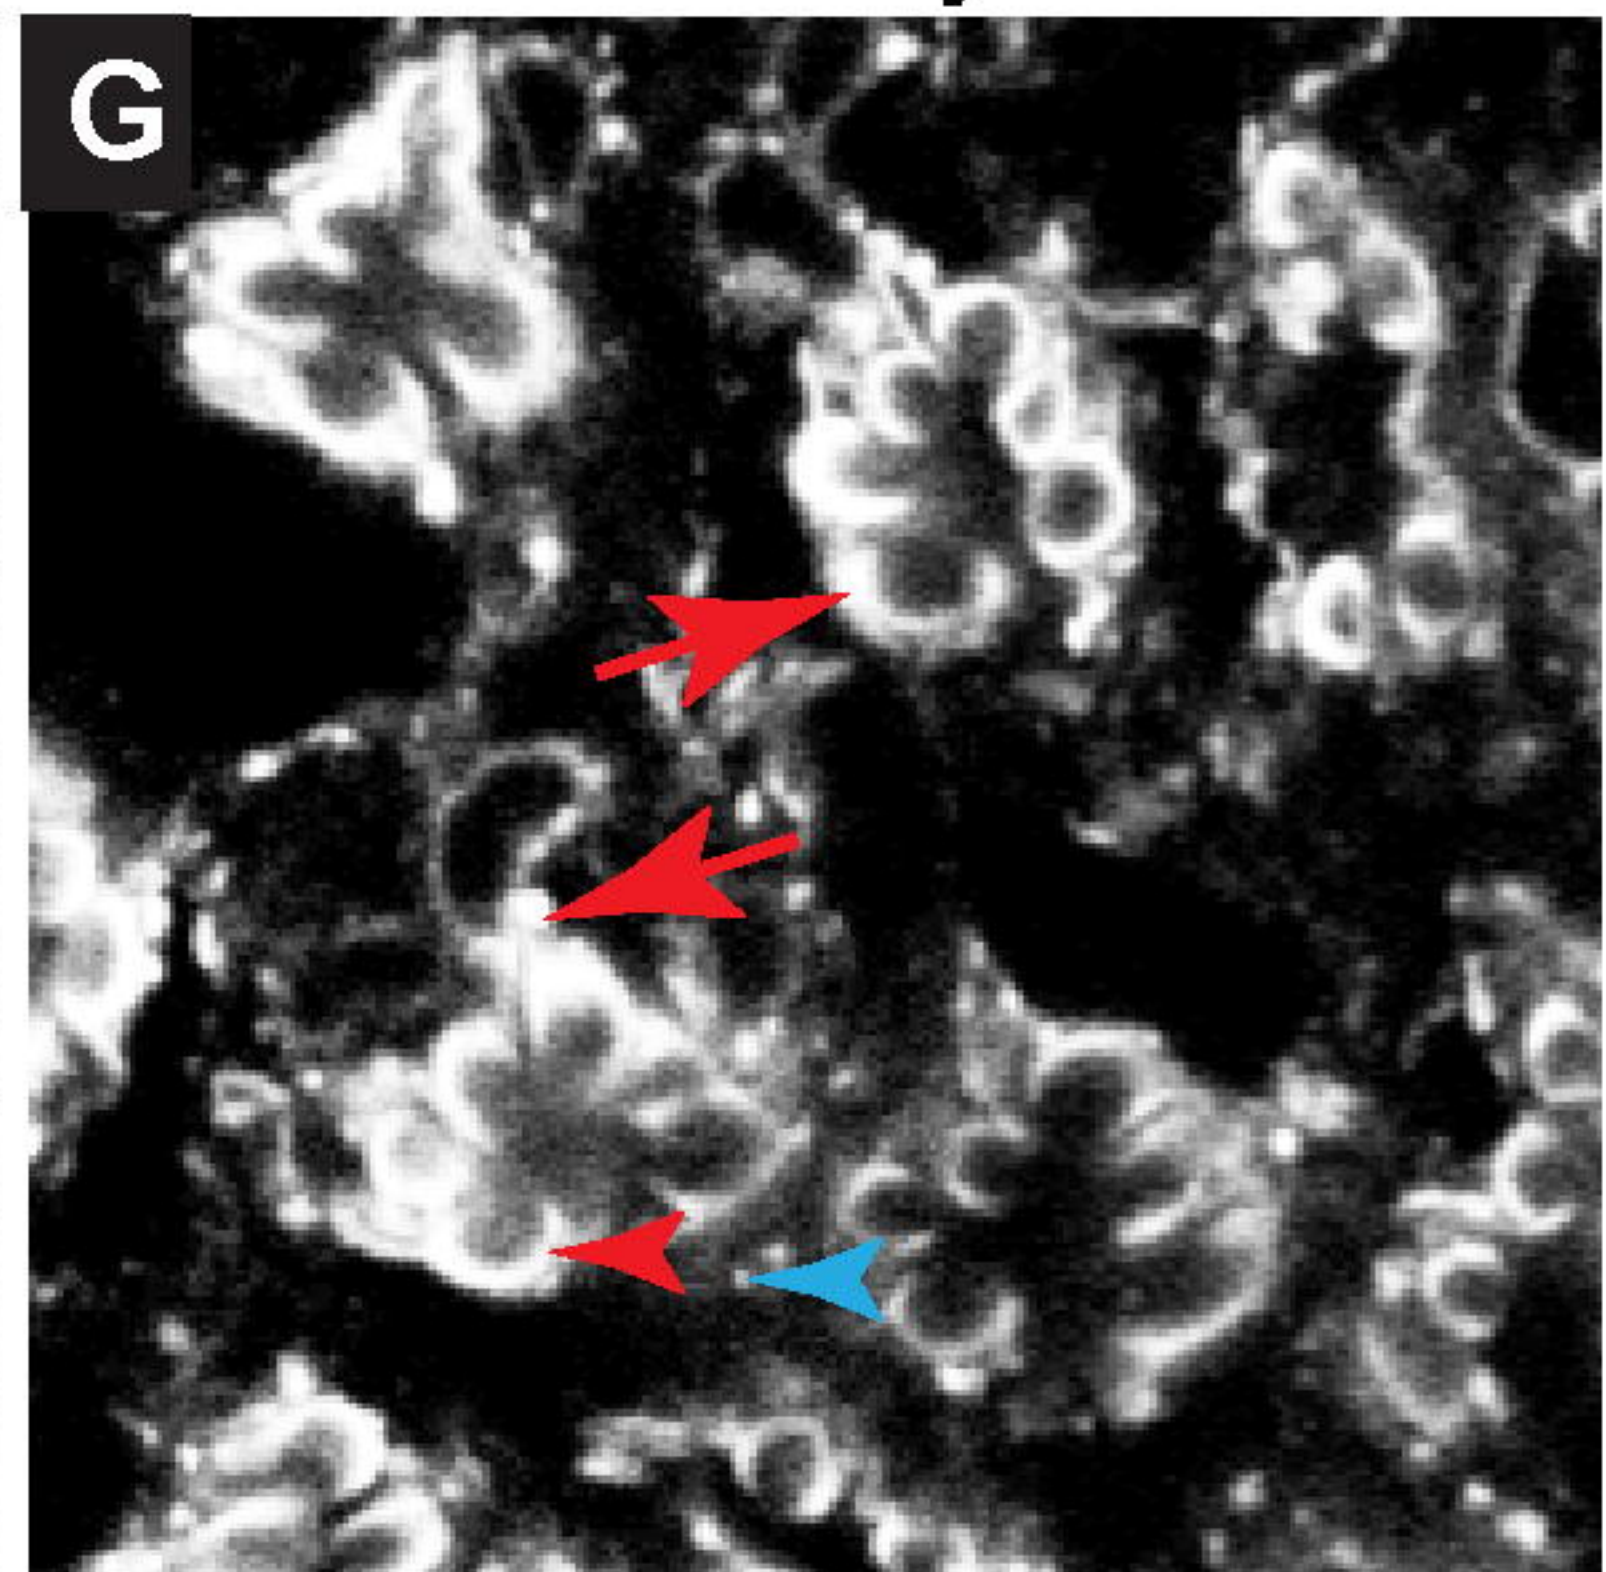

**H** *w\*;;st<sup>1</sup>/+* *w\*;;Prp31<sup>P18</sup>st<sup>1</sup>/+*

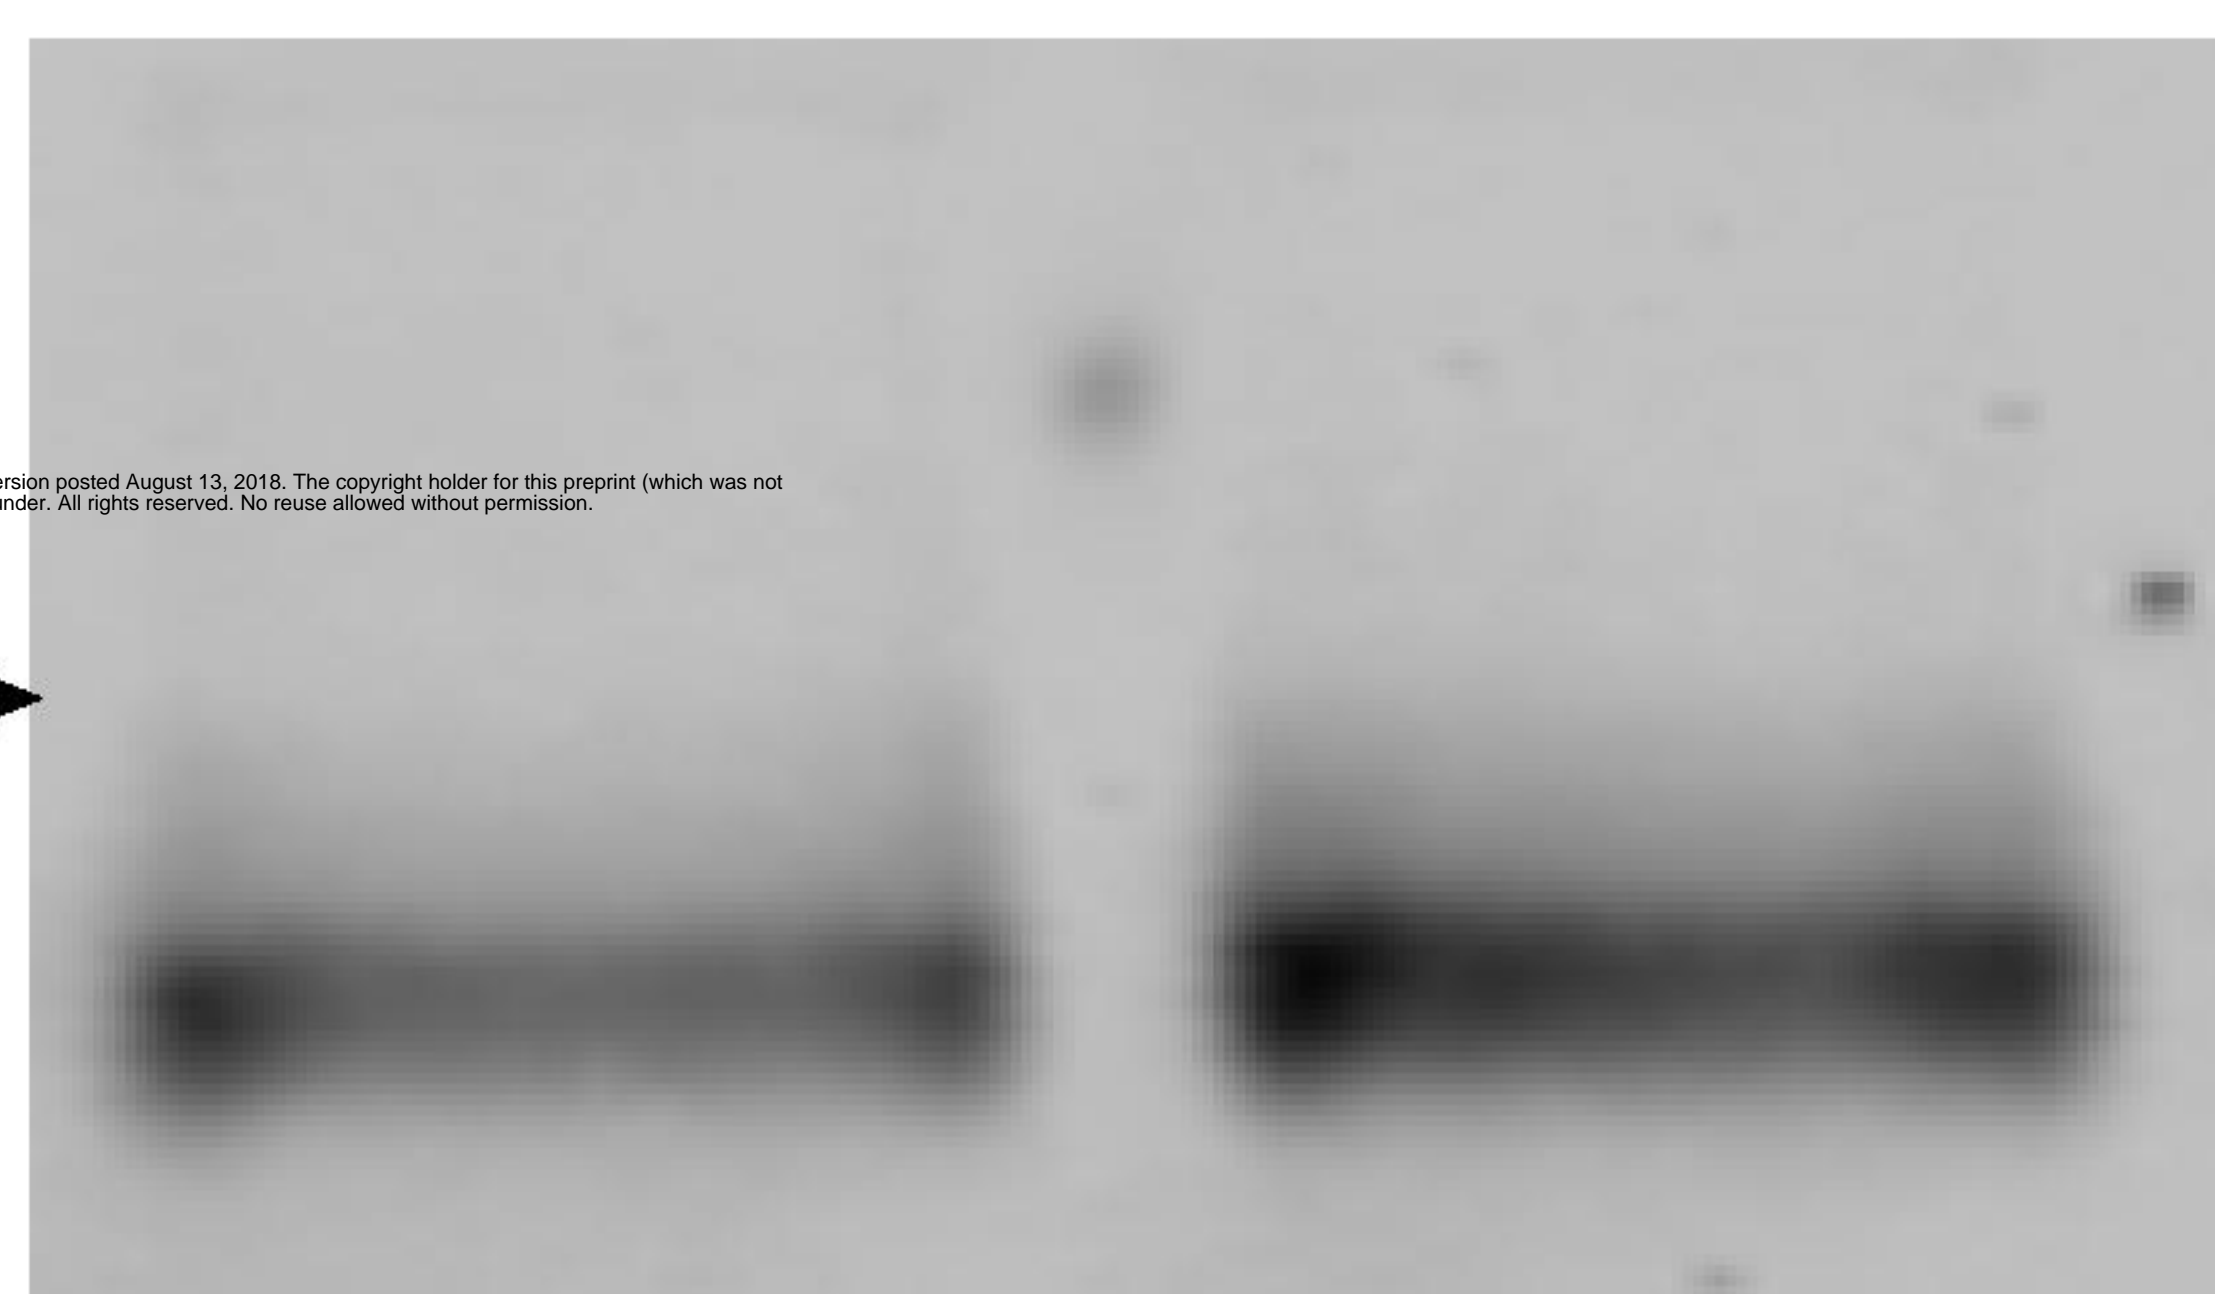

**I**

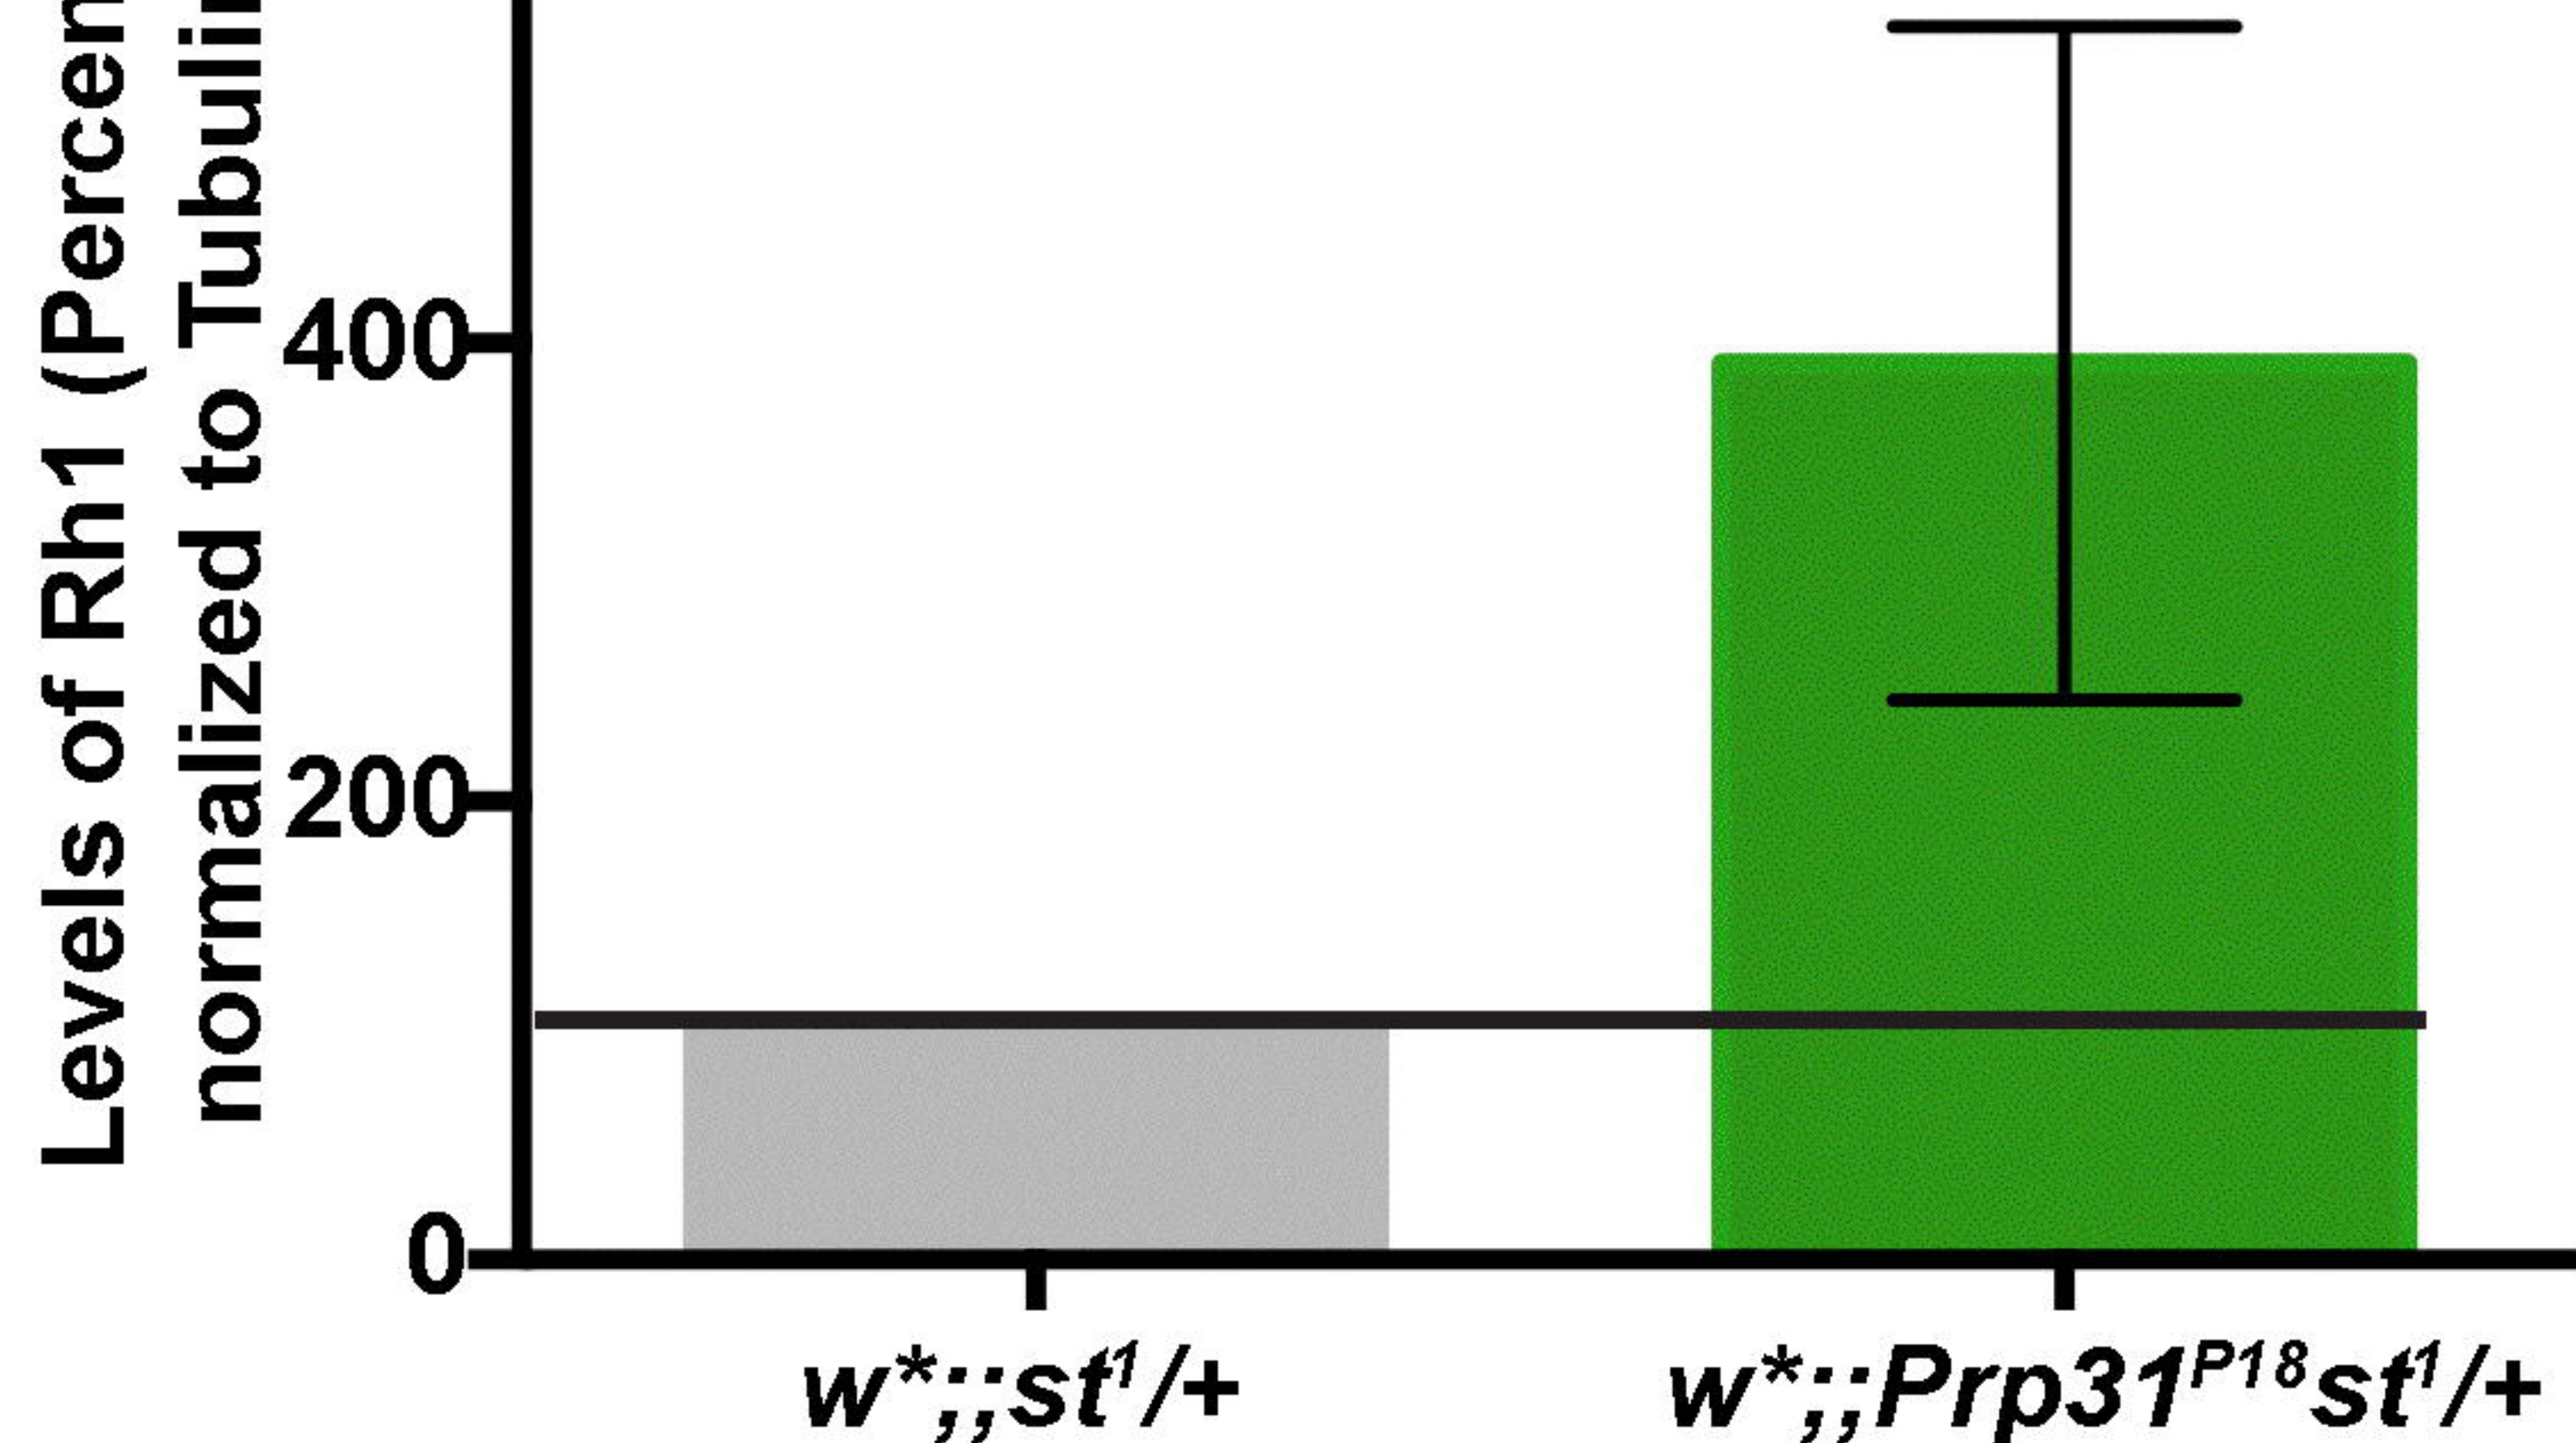

Figure 7



Normal food

carotenoid-free food

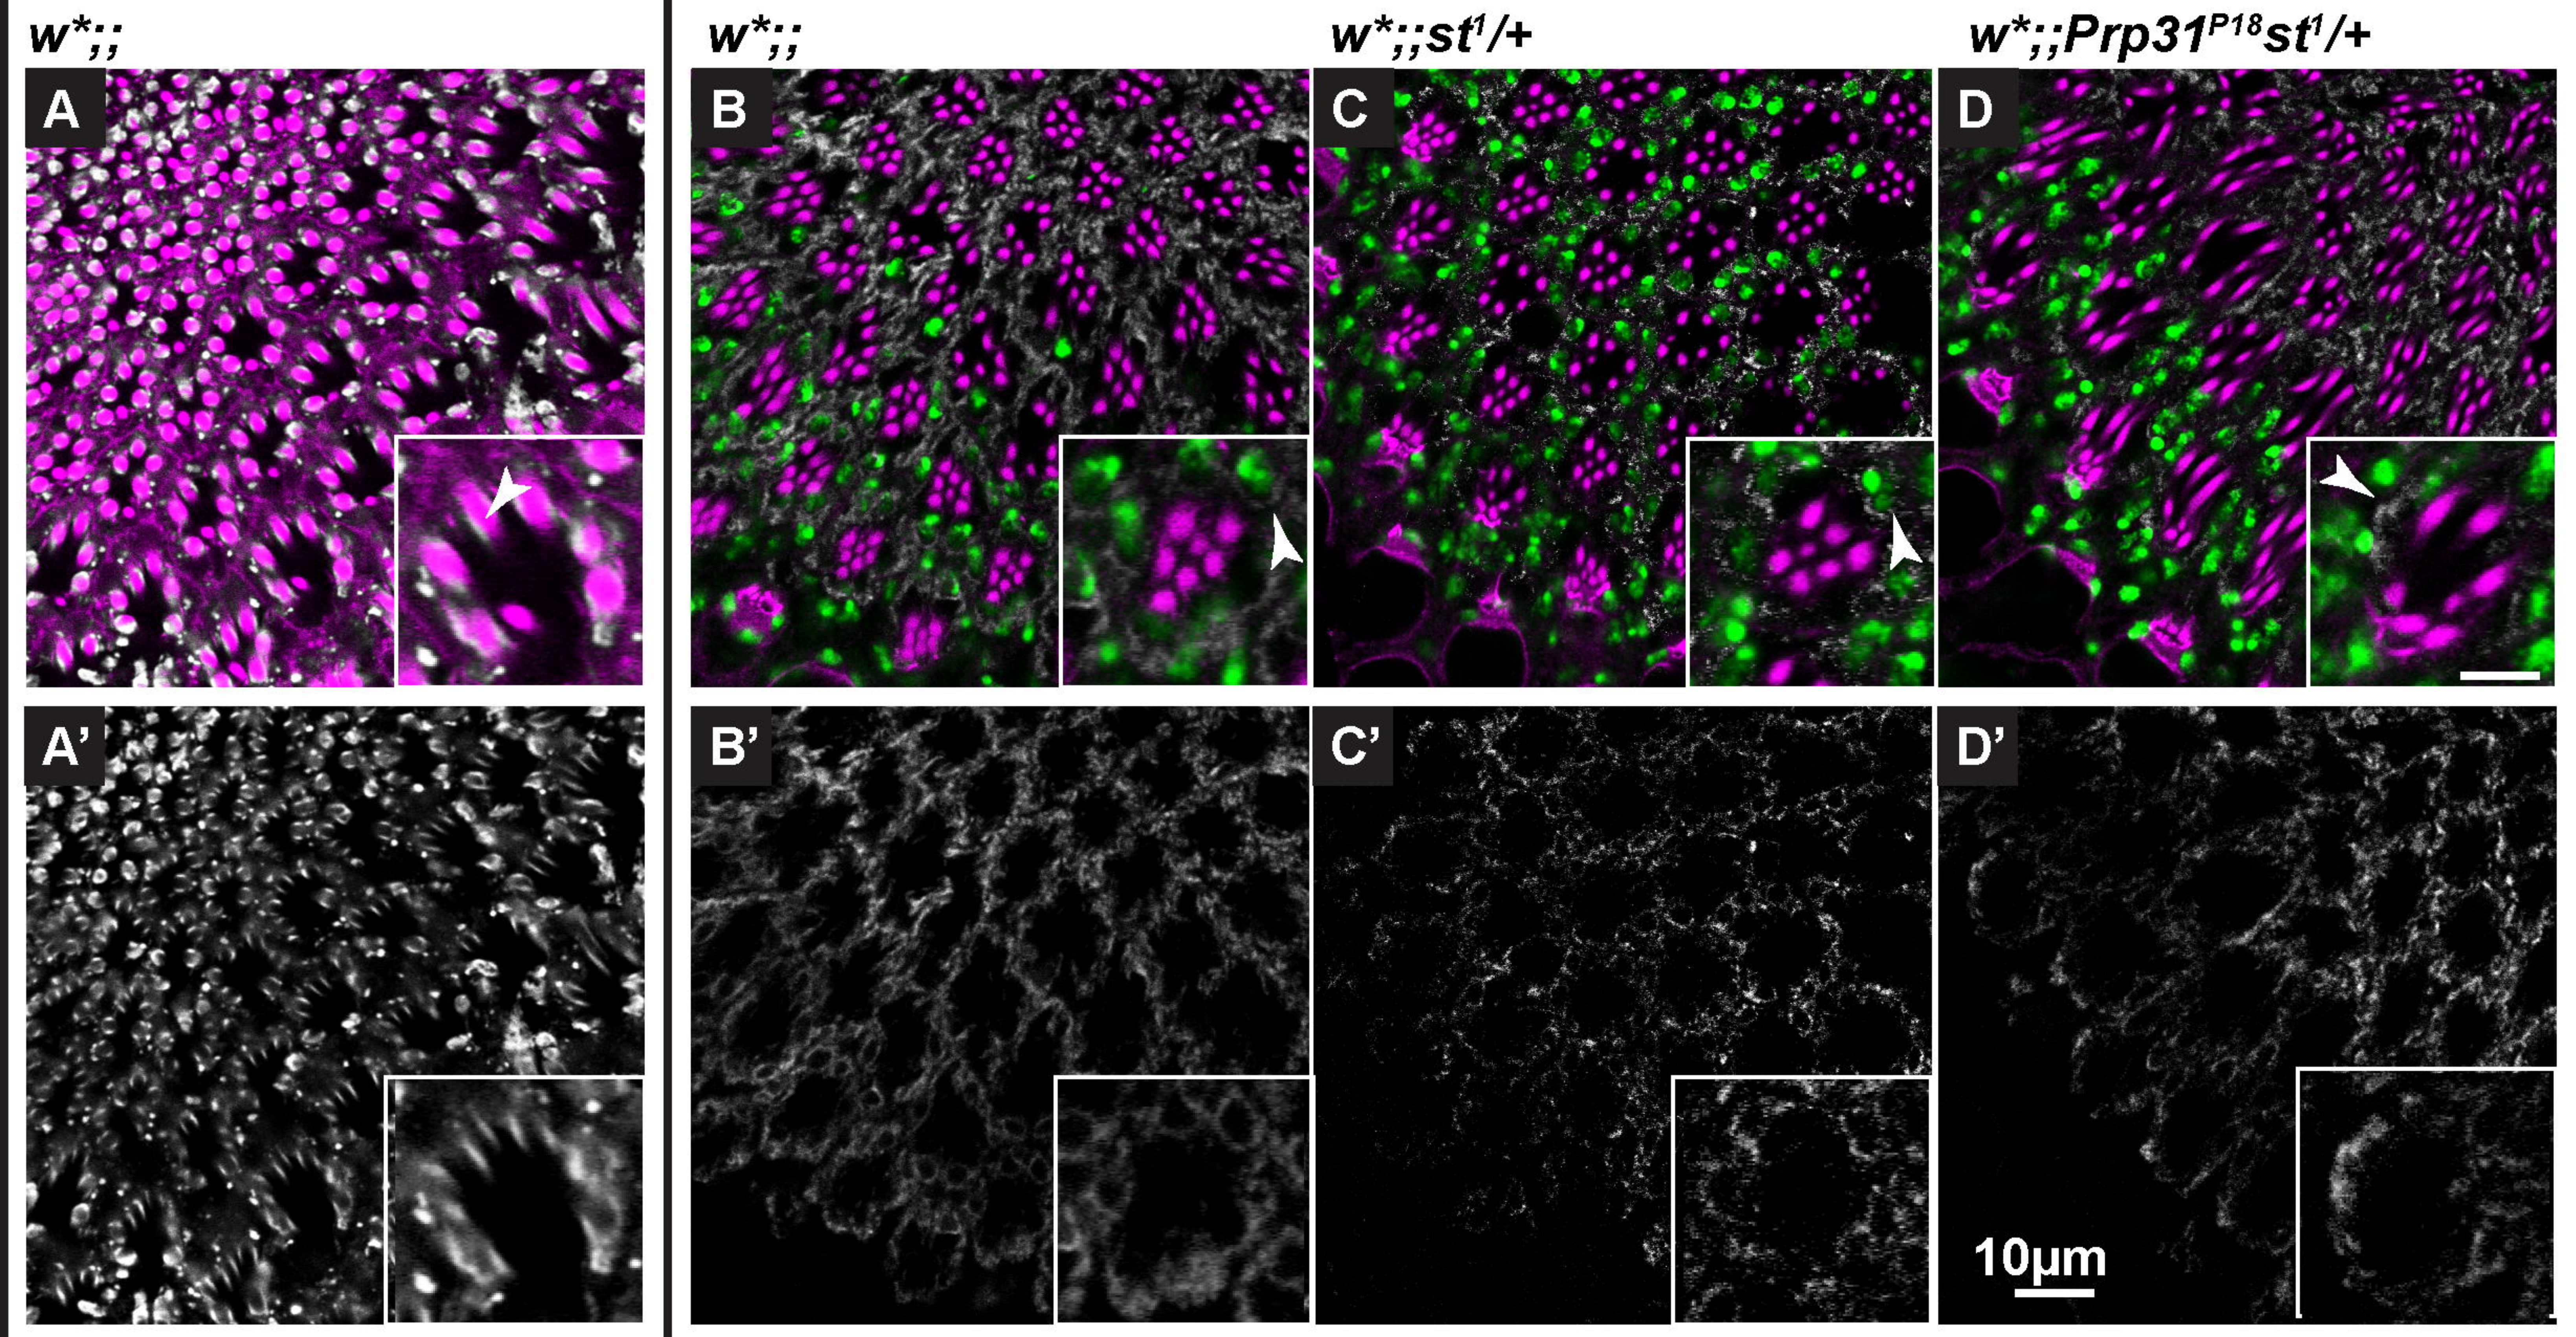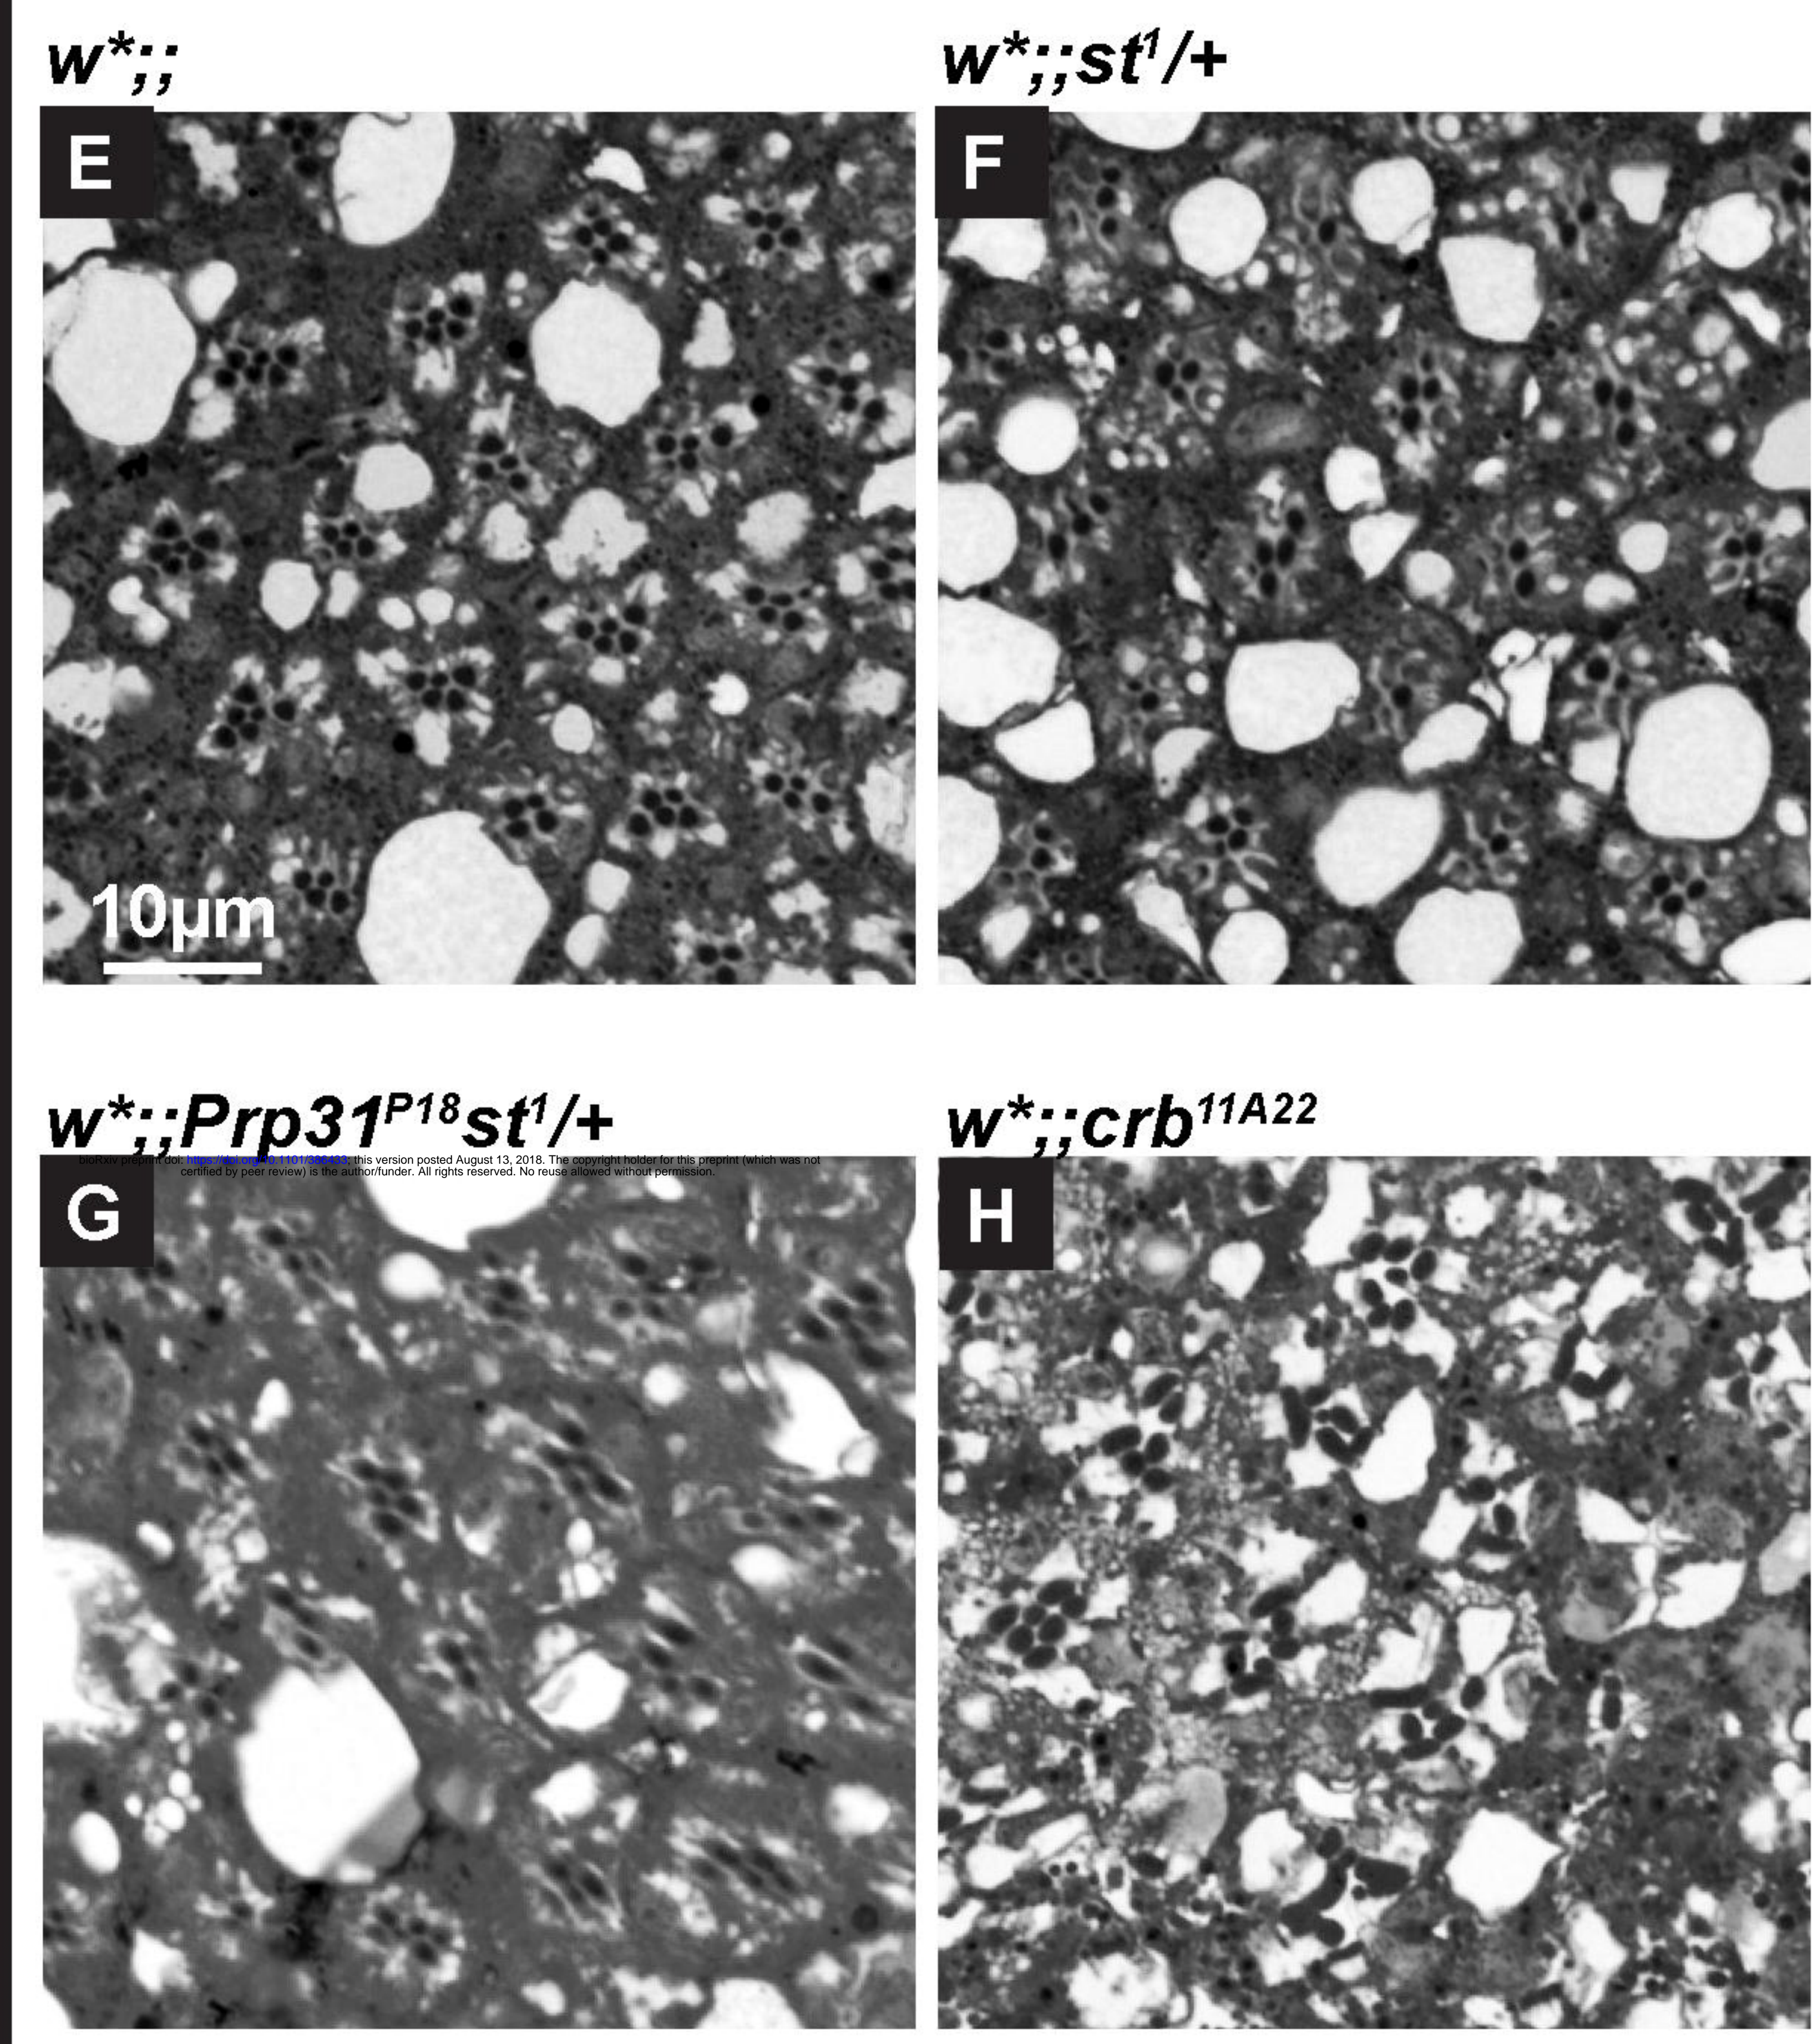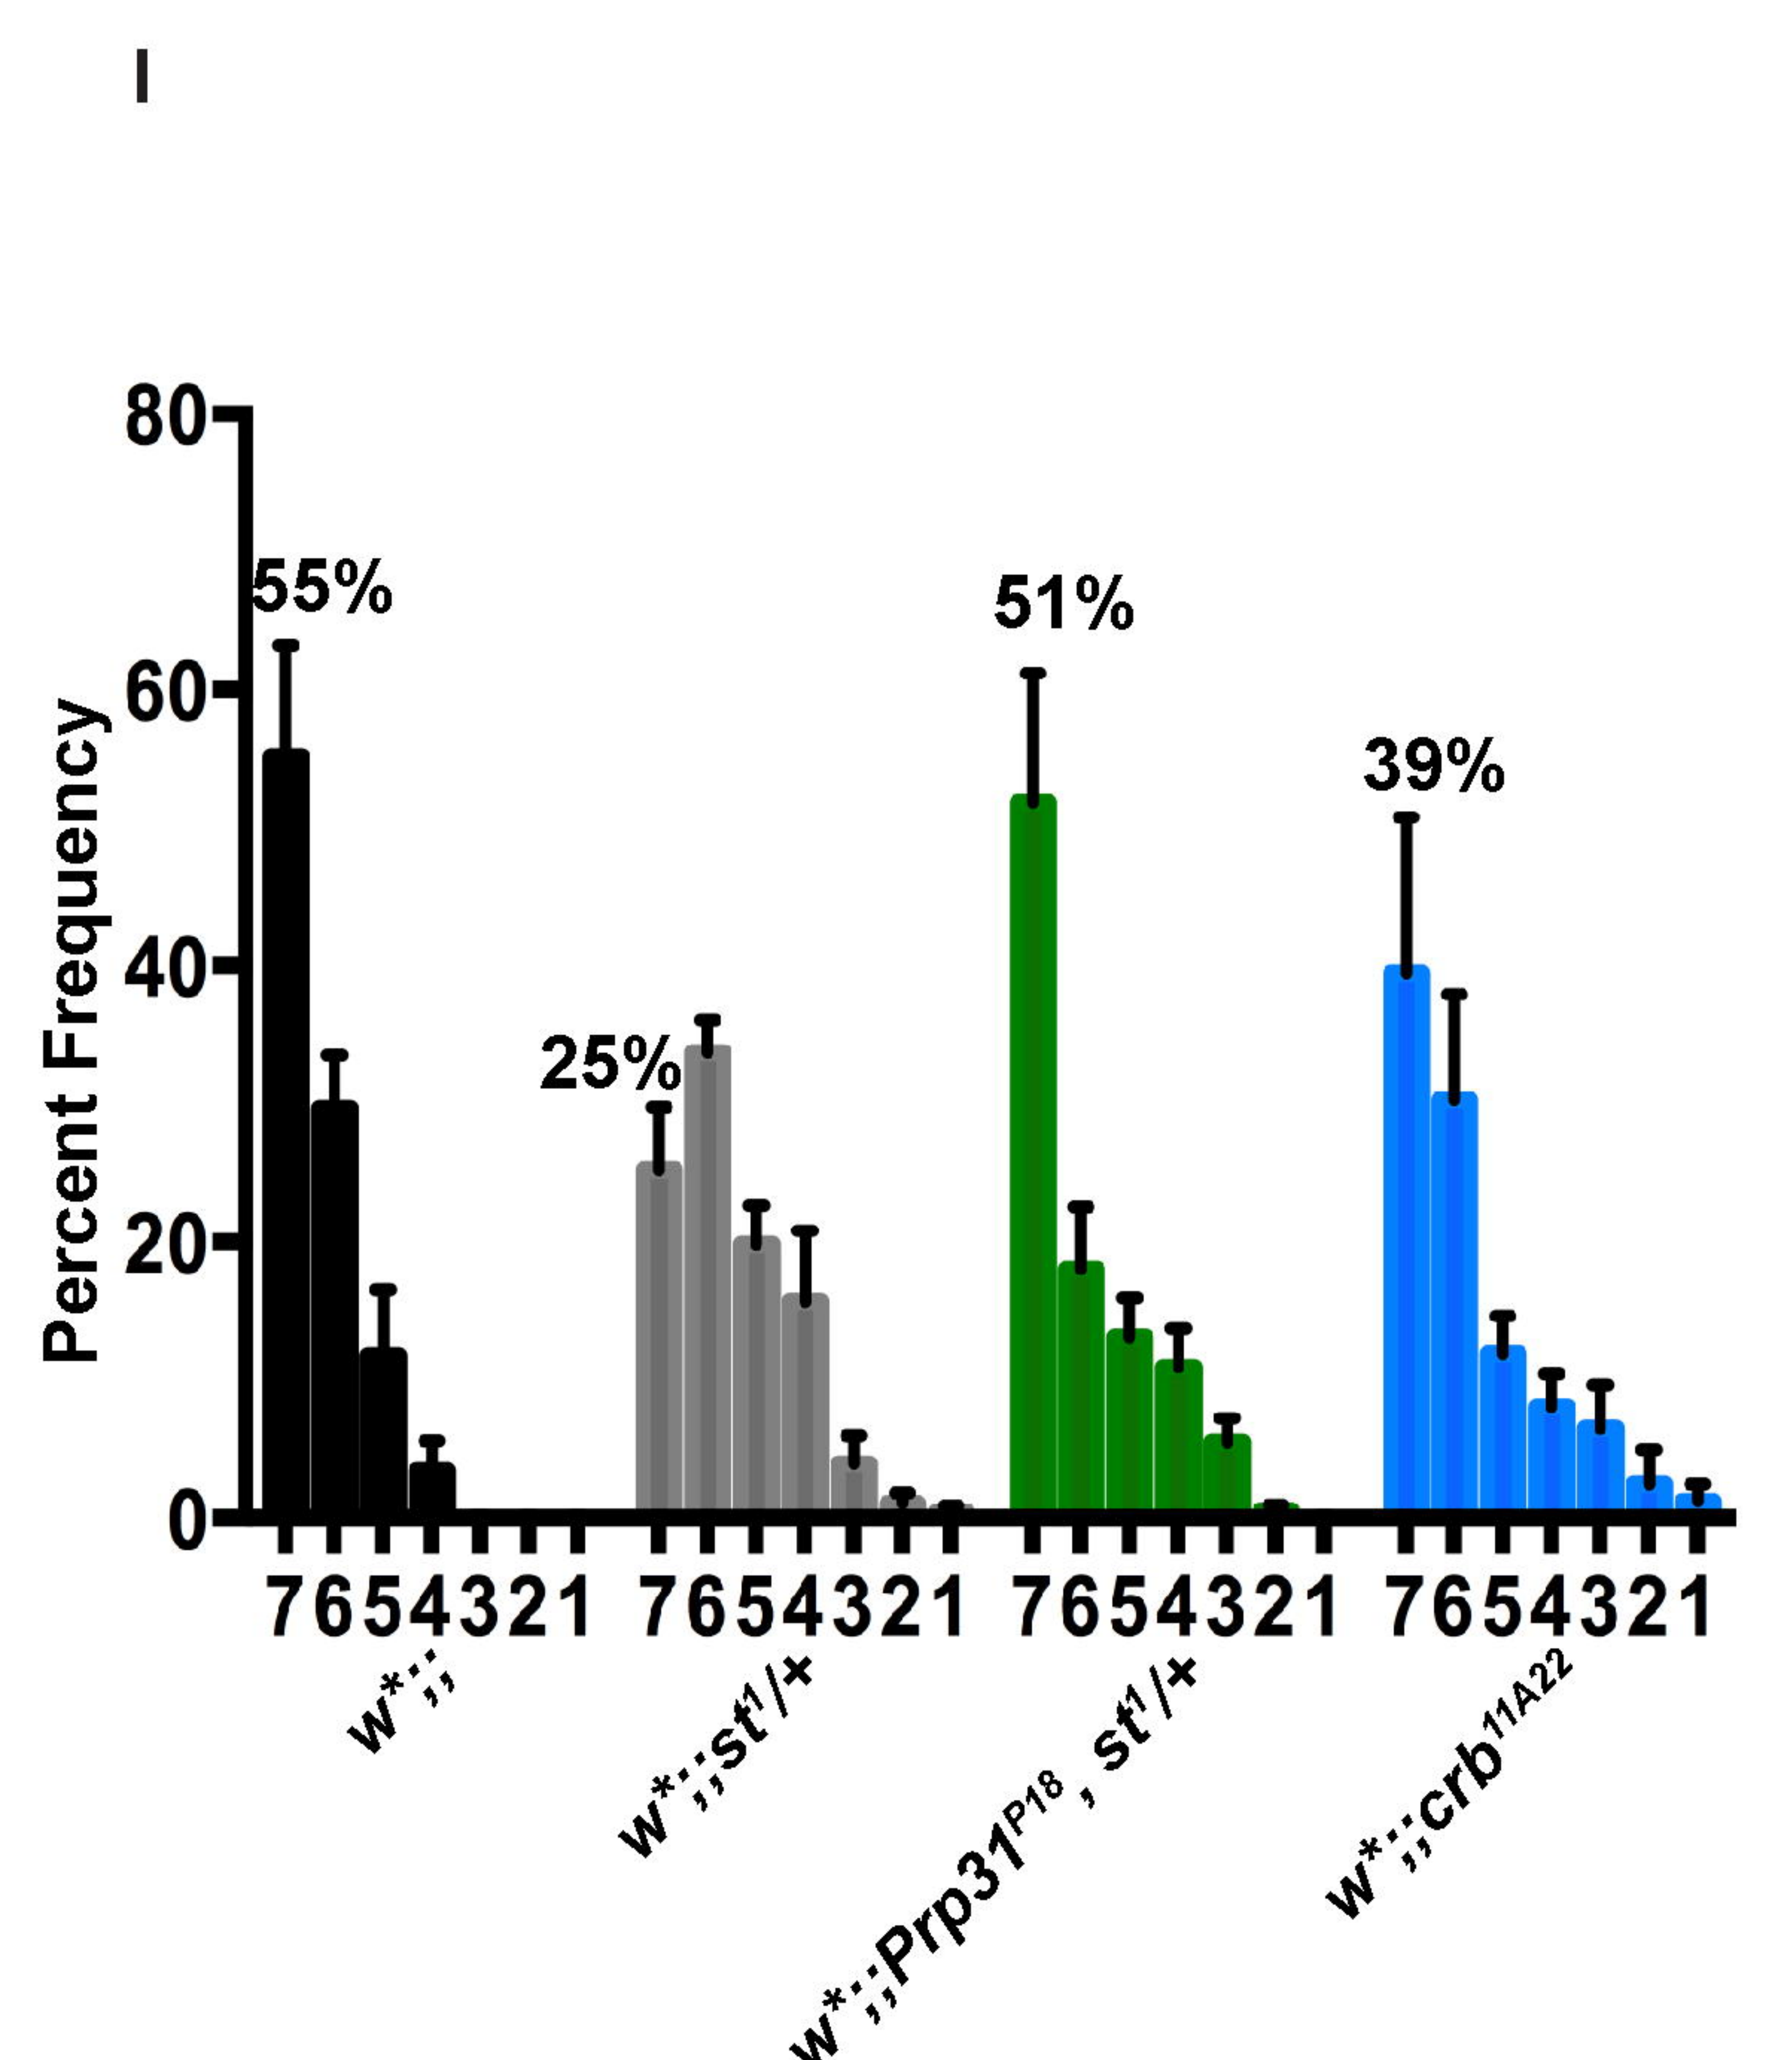

Figure 8



*;gstD-GFP/+;*

*;gstD-GFP/+;Prp31<sup>P18</sup>st<sup>1</sup>/+*

*;gstD-GFP/+;st<sup>1</sup>/+*

*gstD-GFP/Phalloidin*

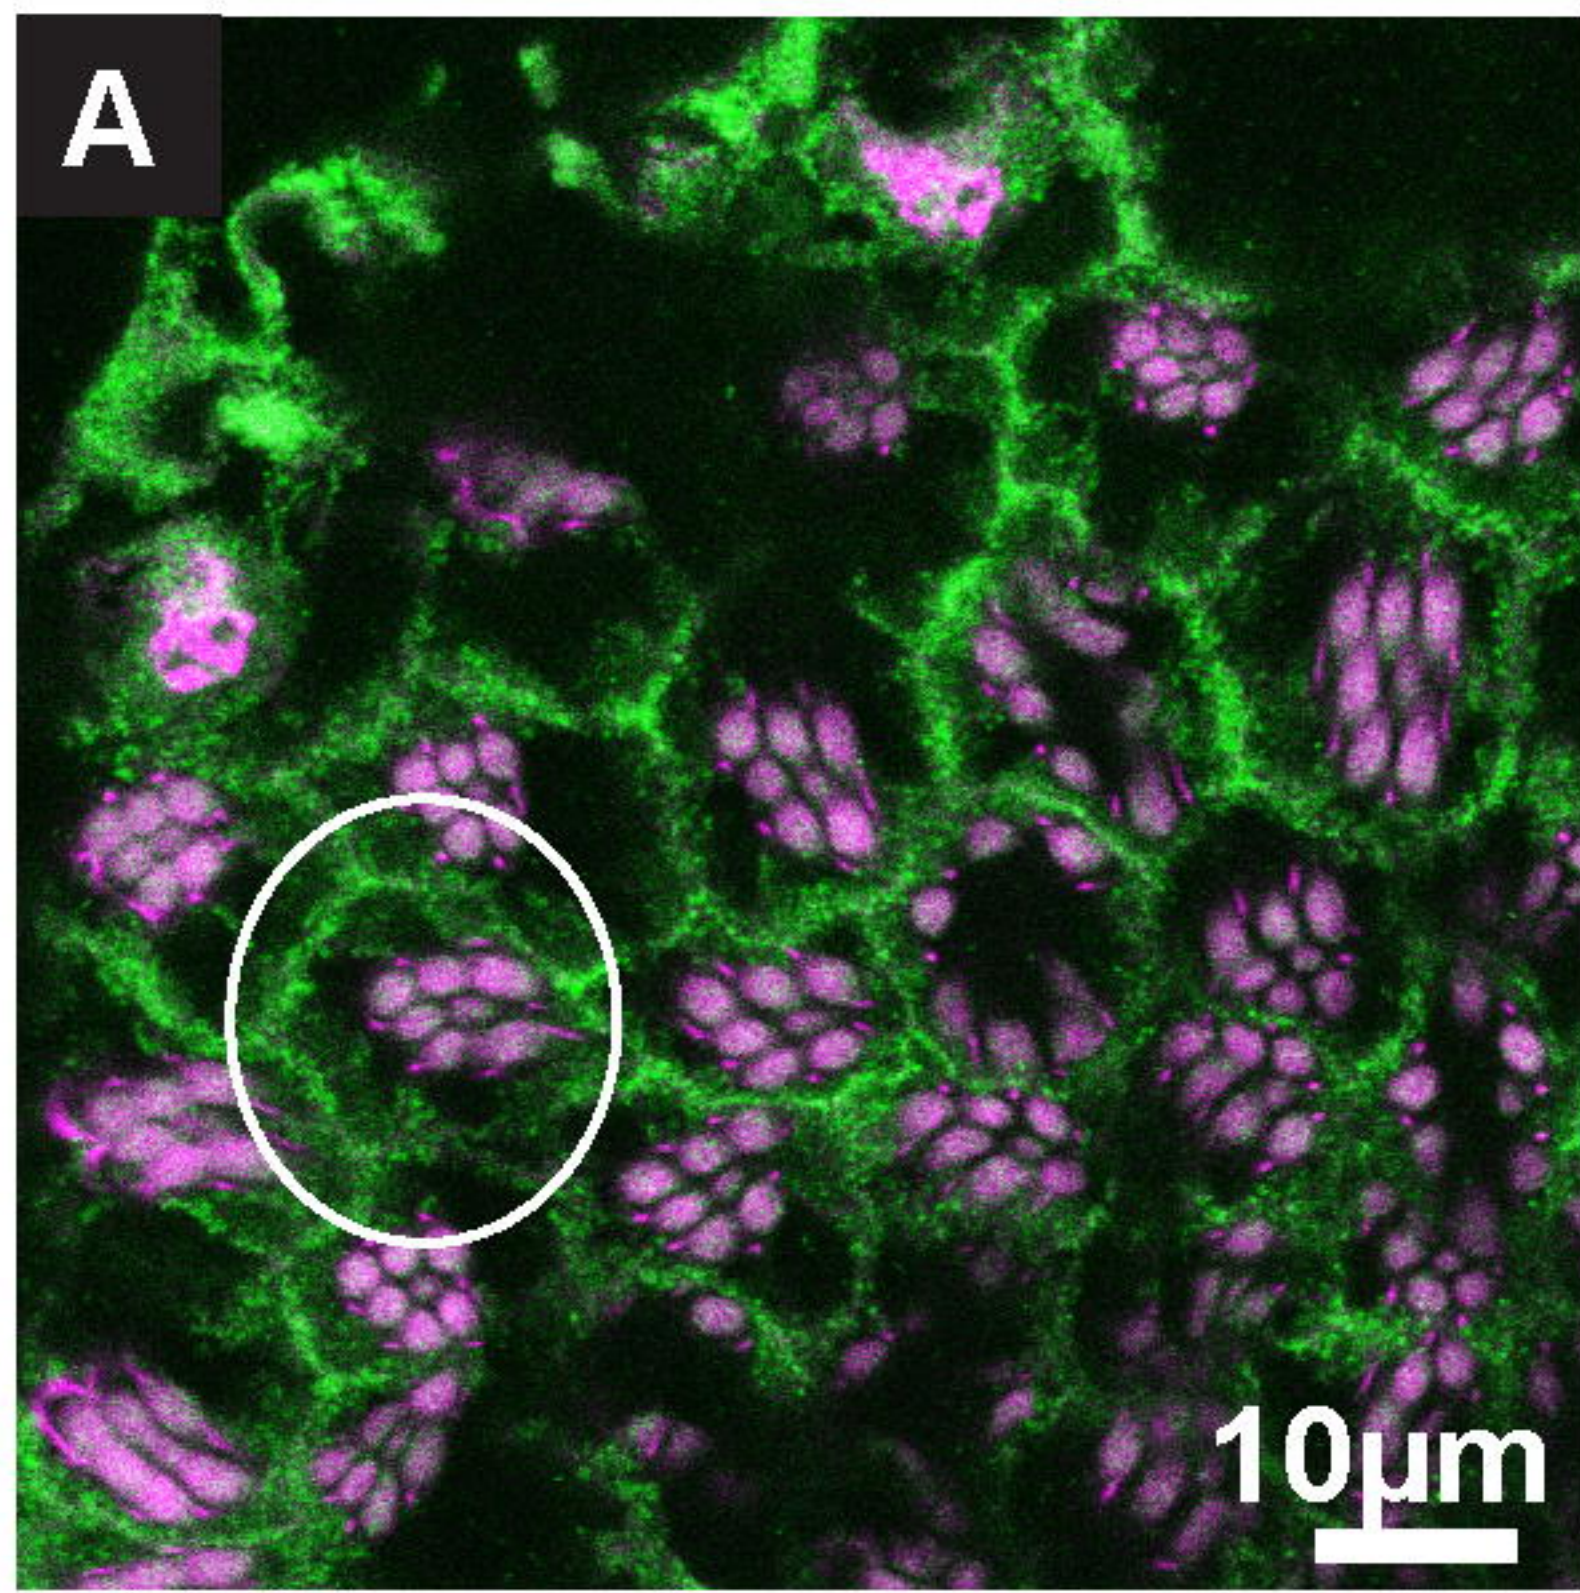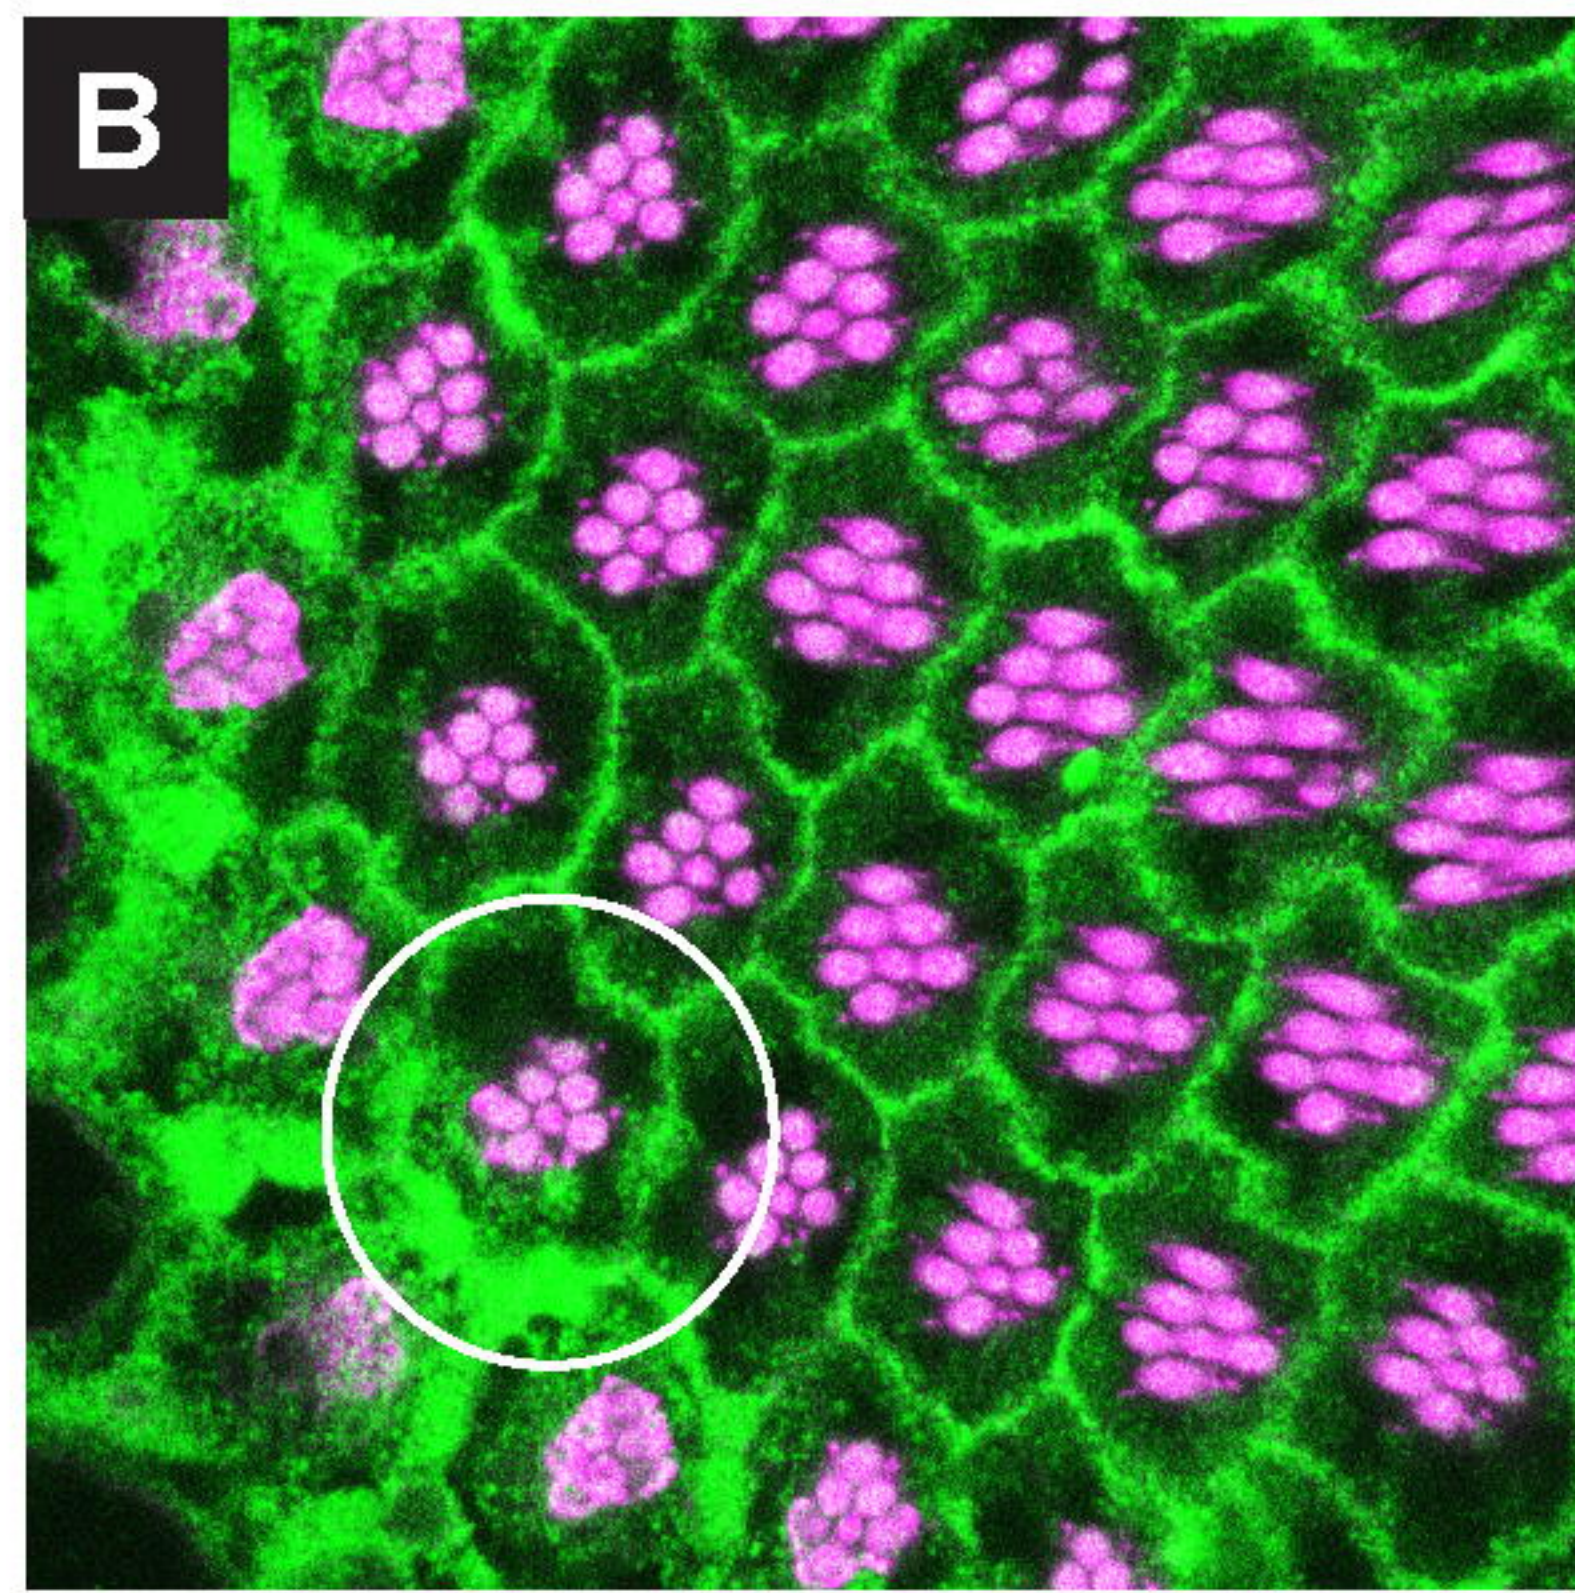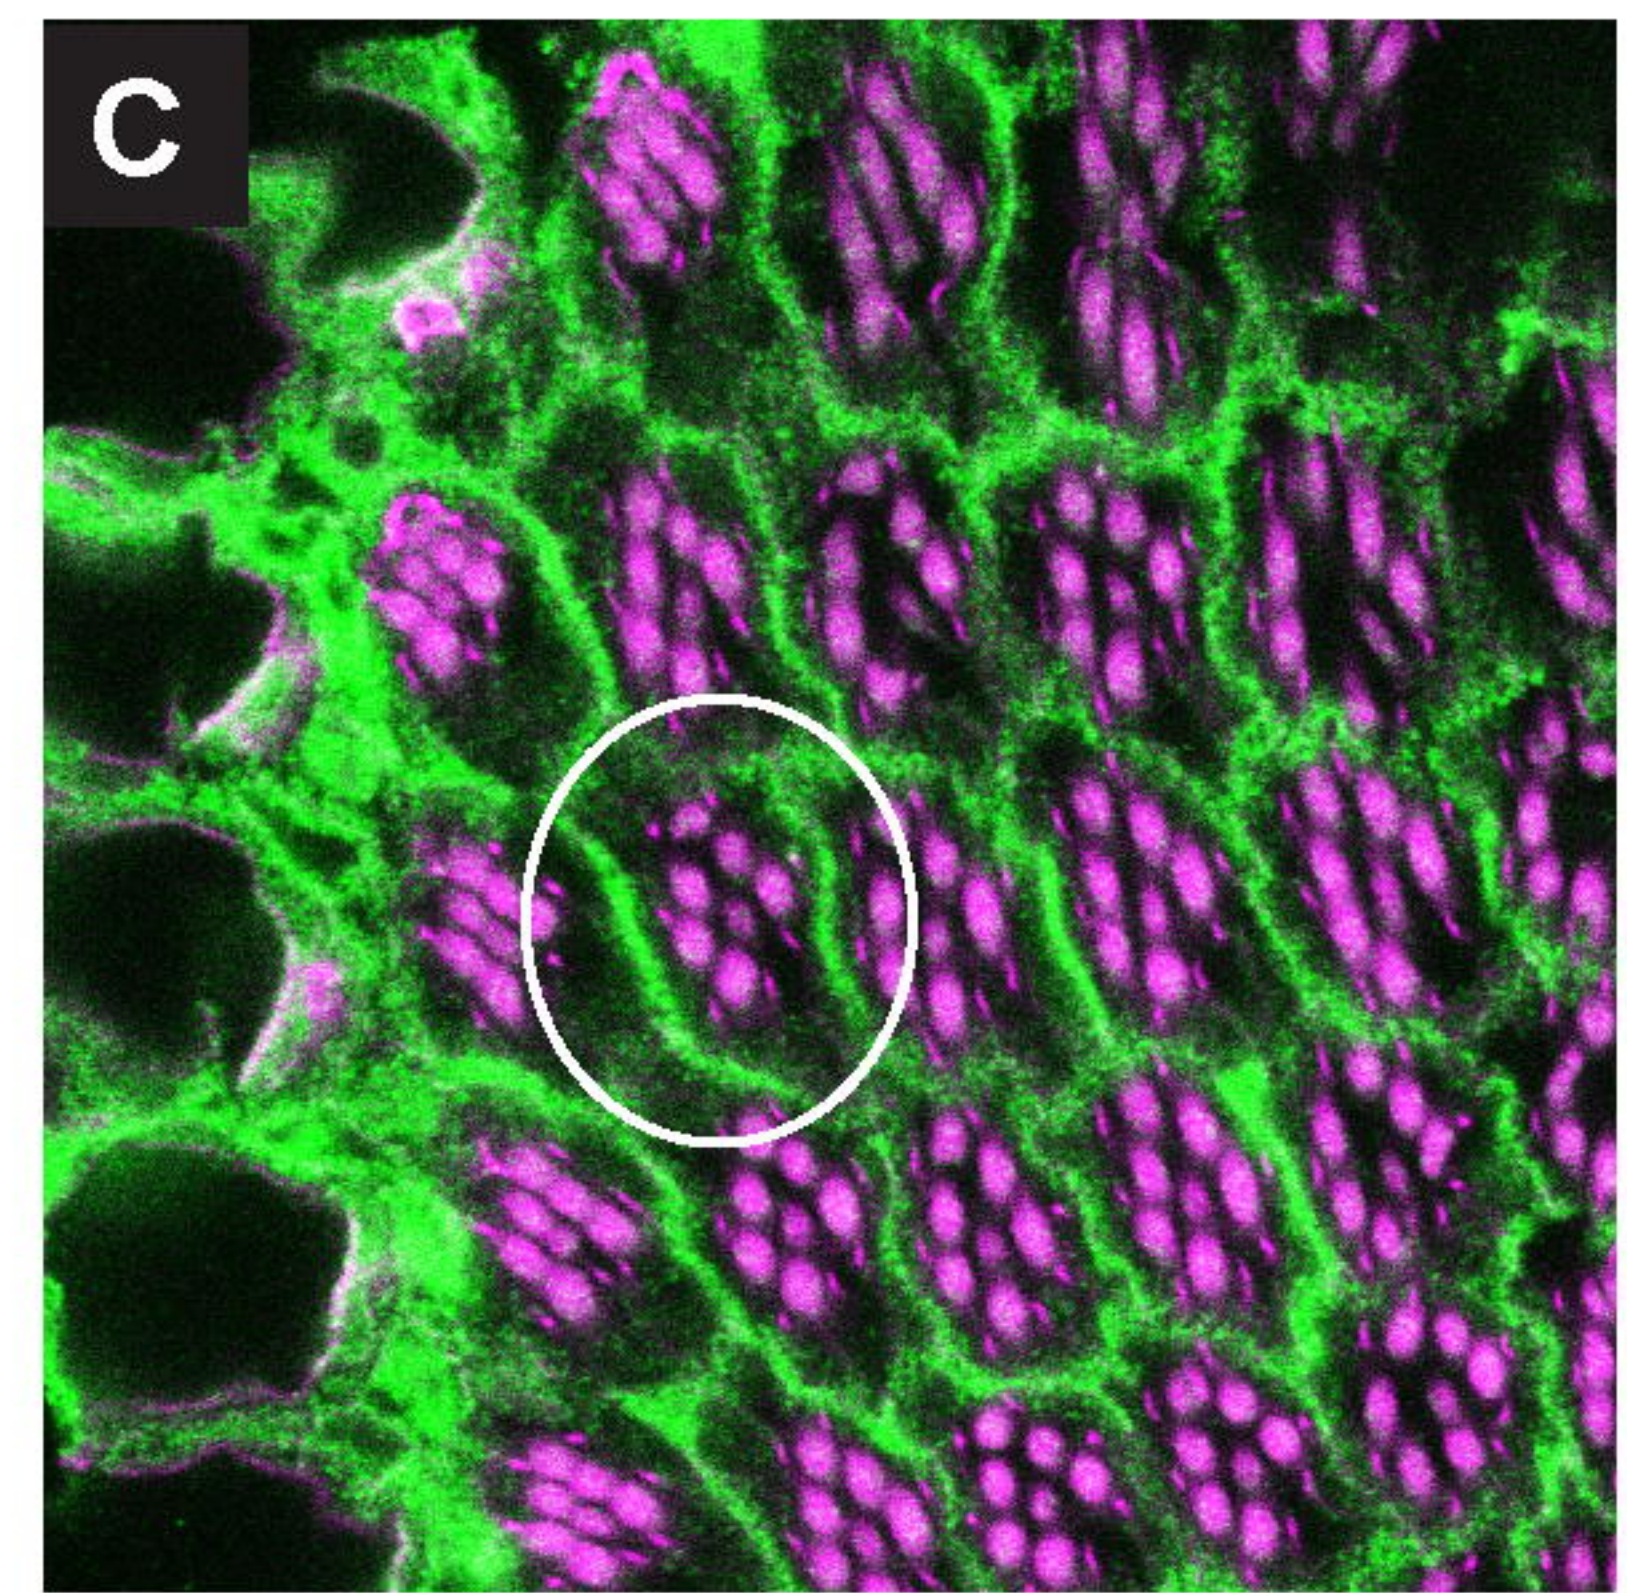

*w\*;;*

*w\*;;Prp31<sup>P18</sup>st<sup>1</sup>/+*

*w\*;;st<sup>1</sup>/+*

*DHE (ROS)*

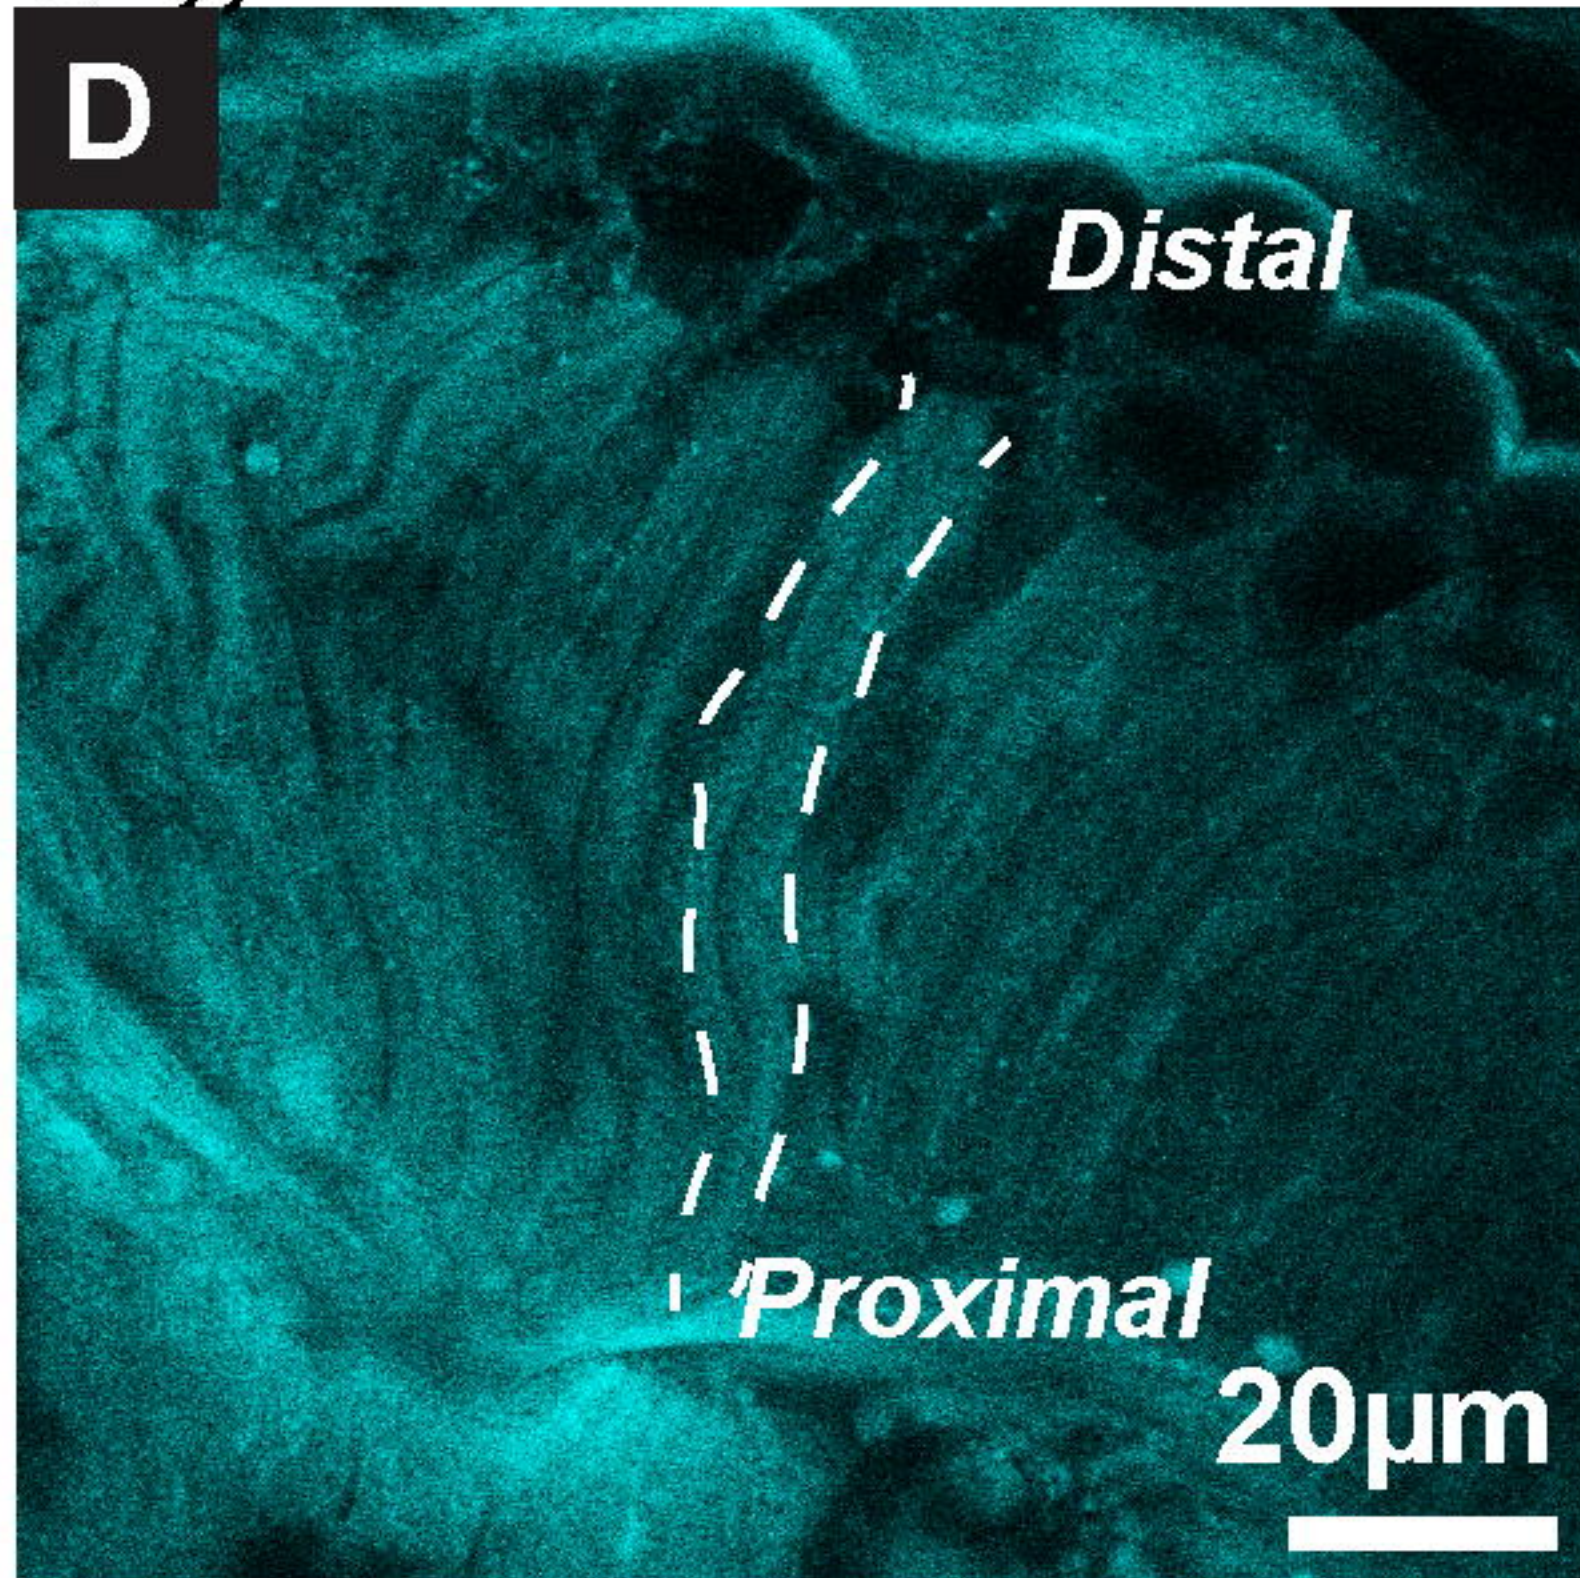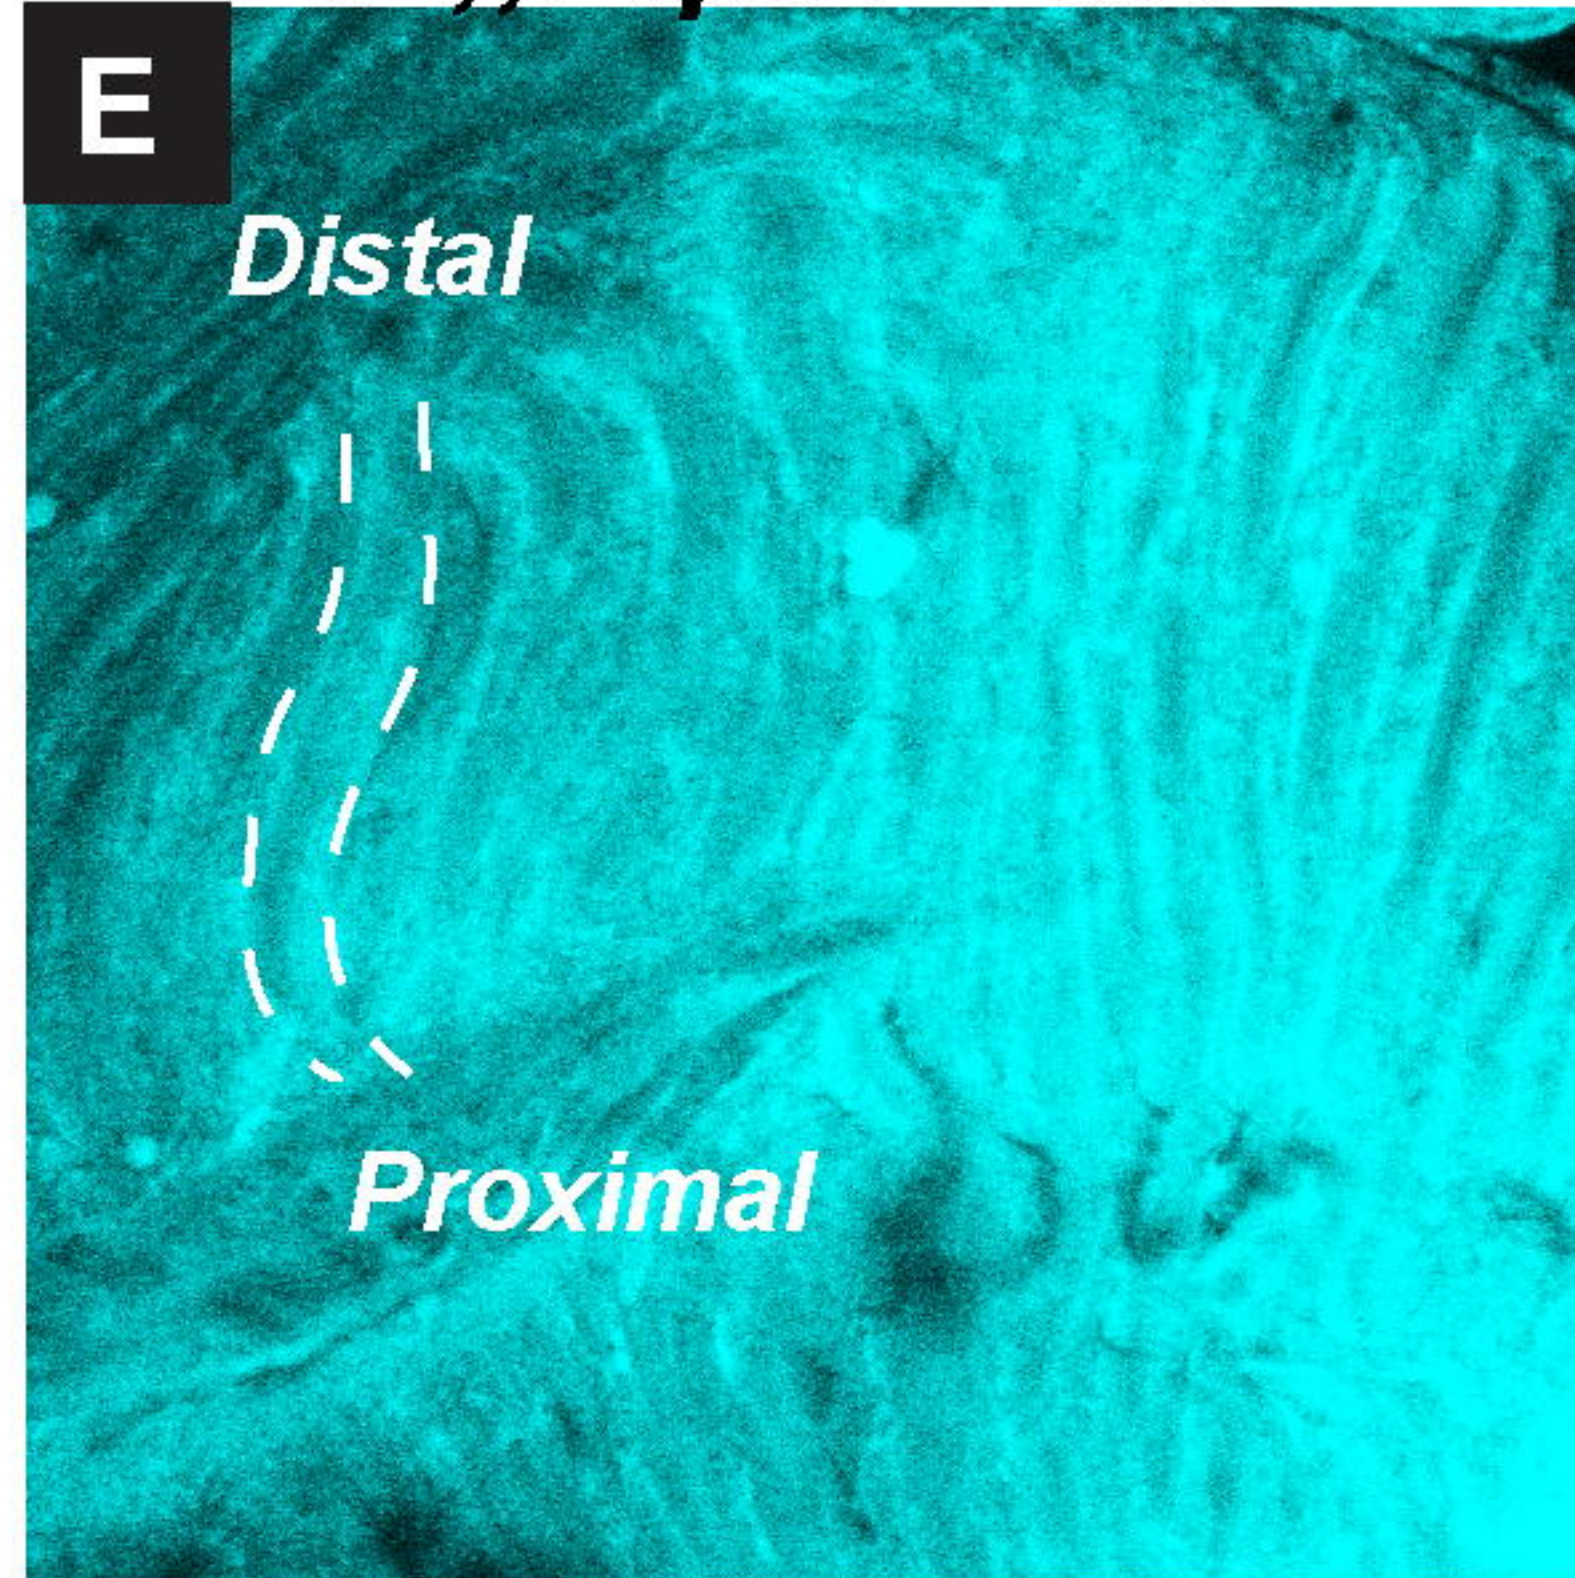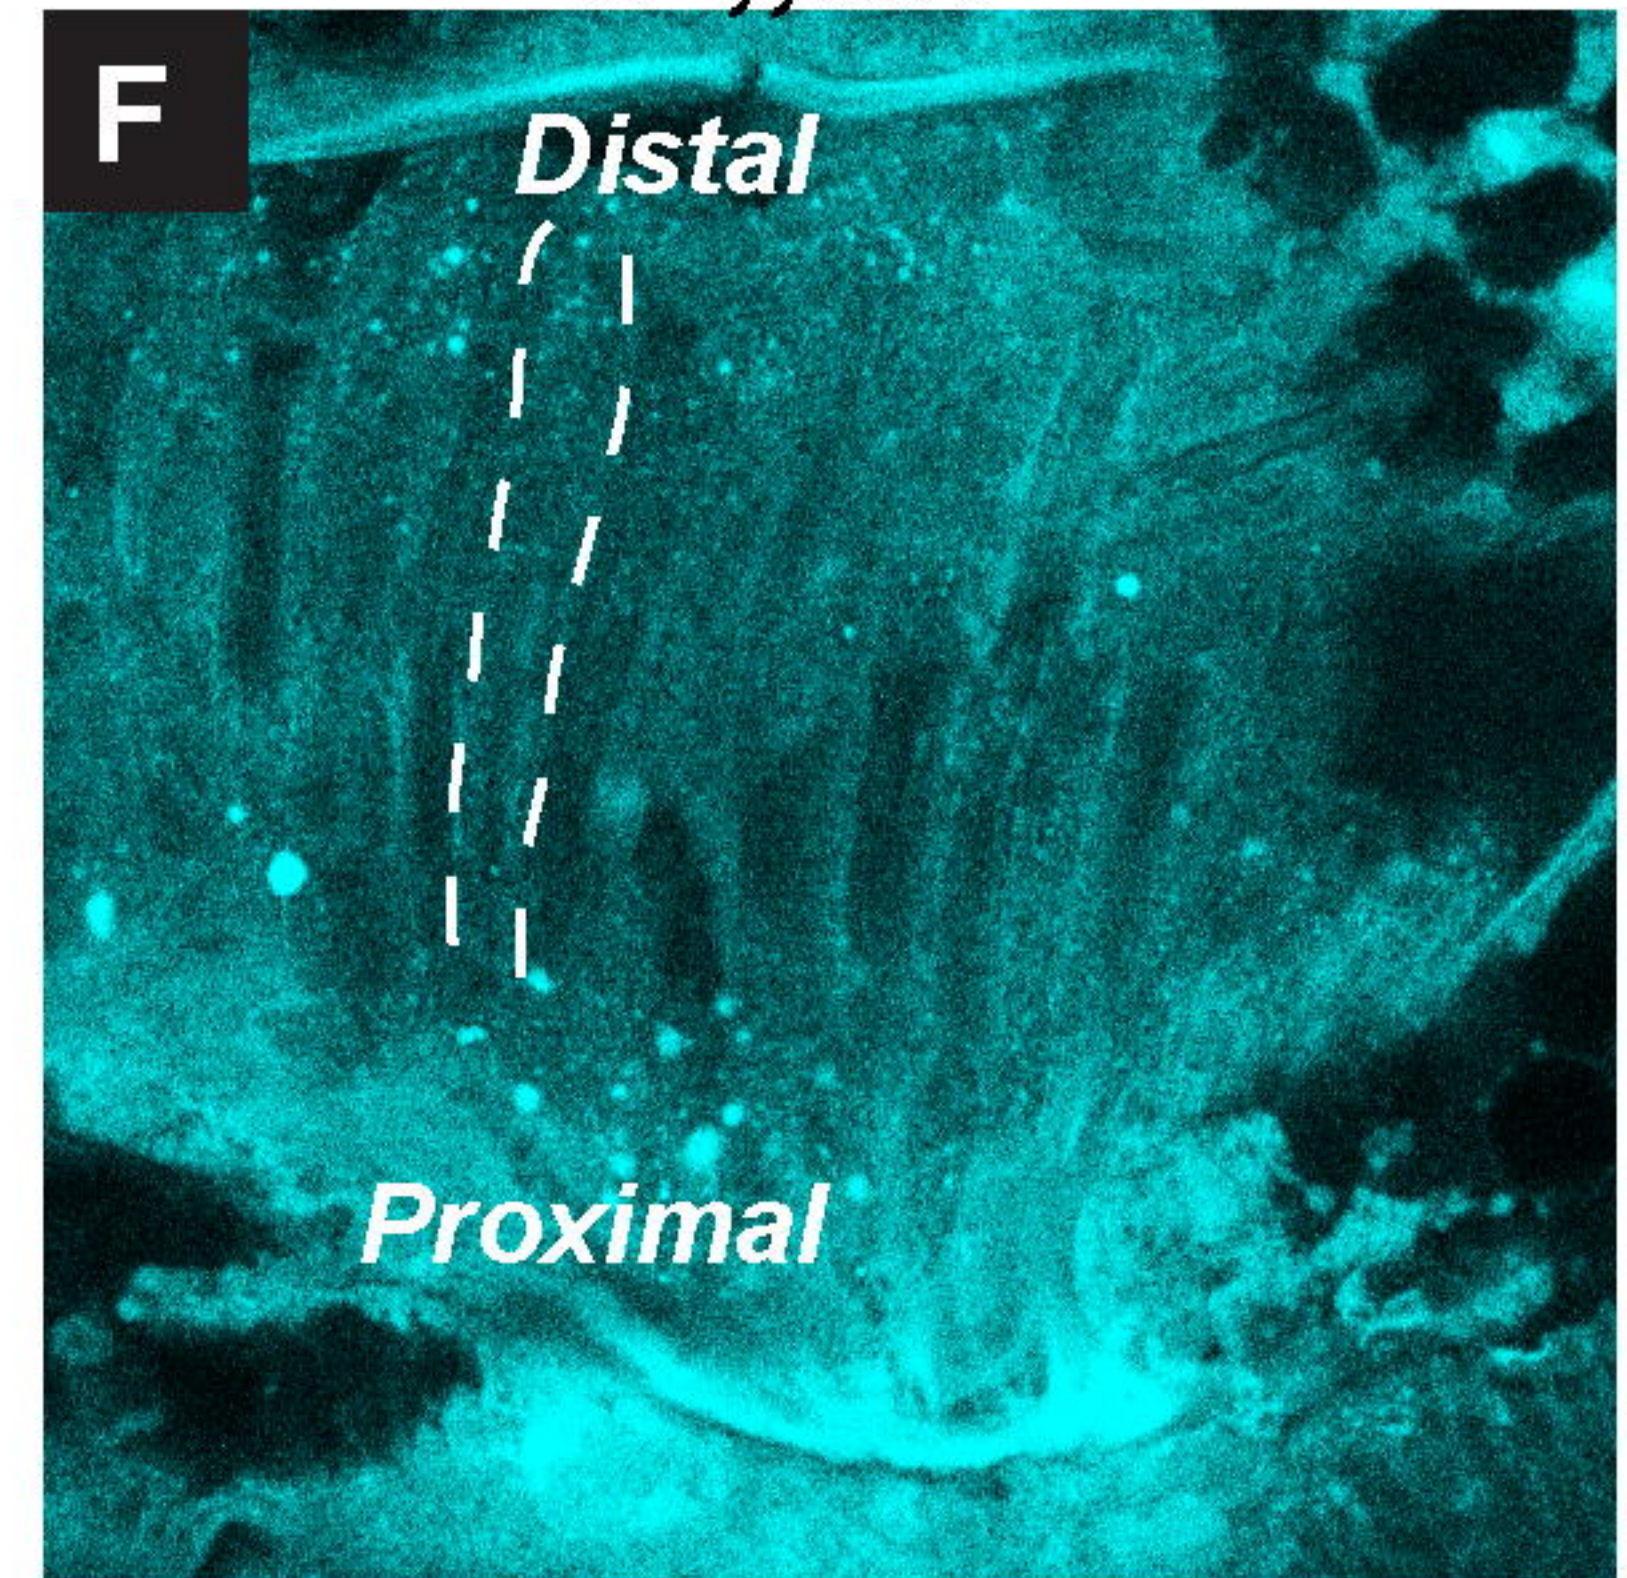

*cn, bw, gstD-GFP/+;*

*cn, bw, gstD-GFP/+;Df (3L) 217/+*

*gstD-GFP/Phalloidin*

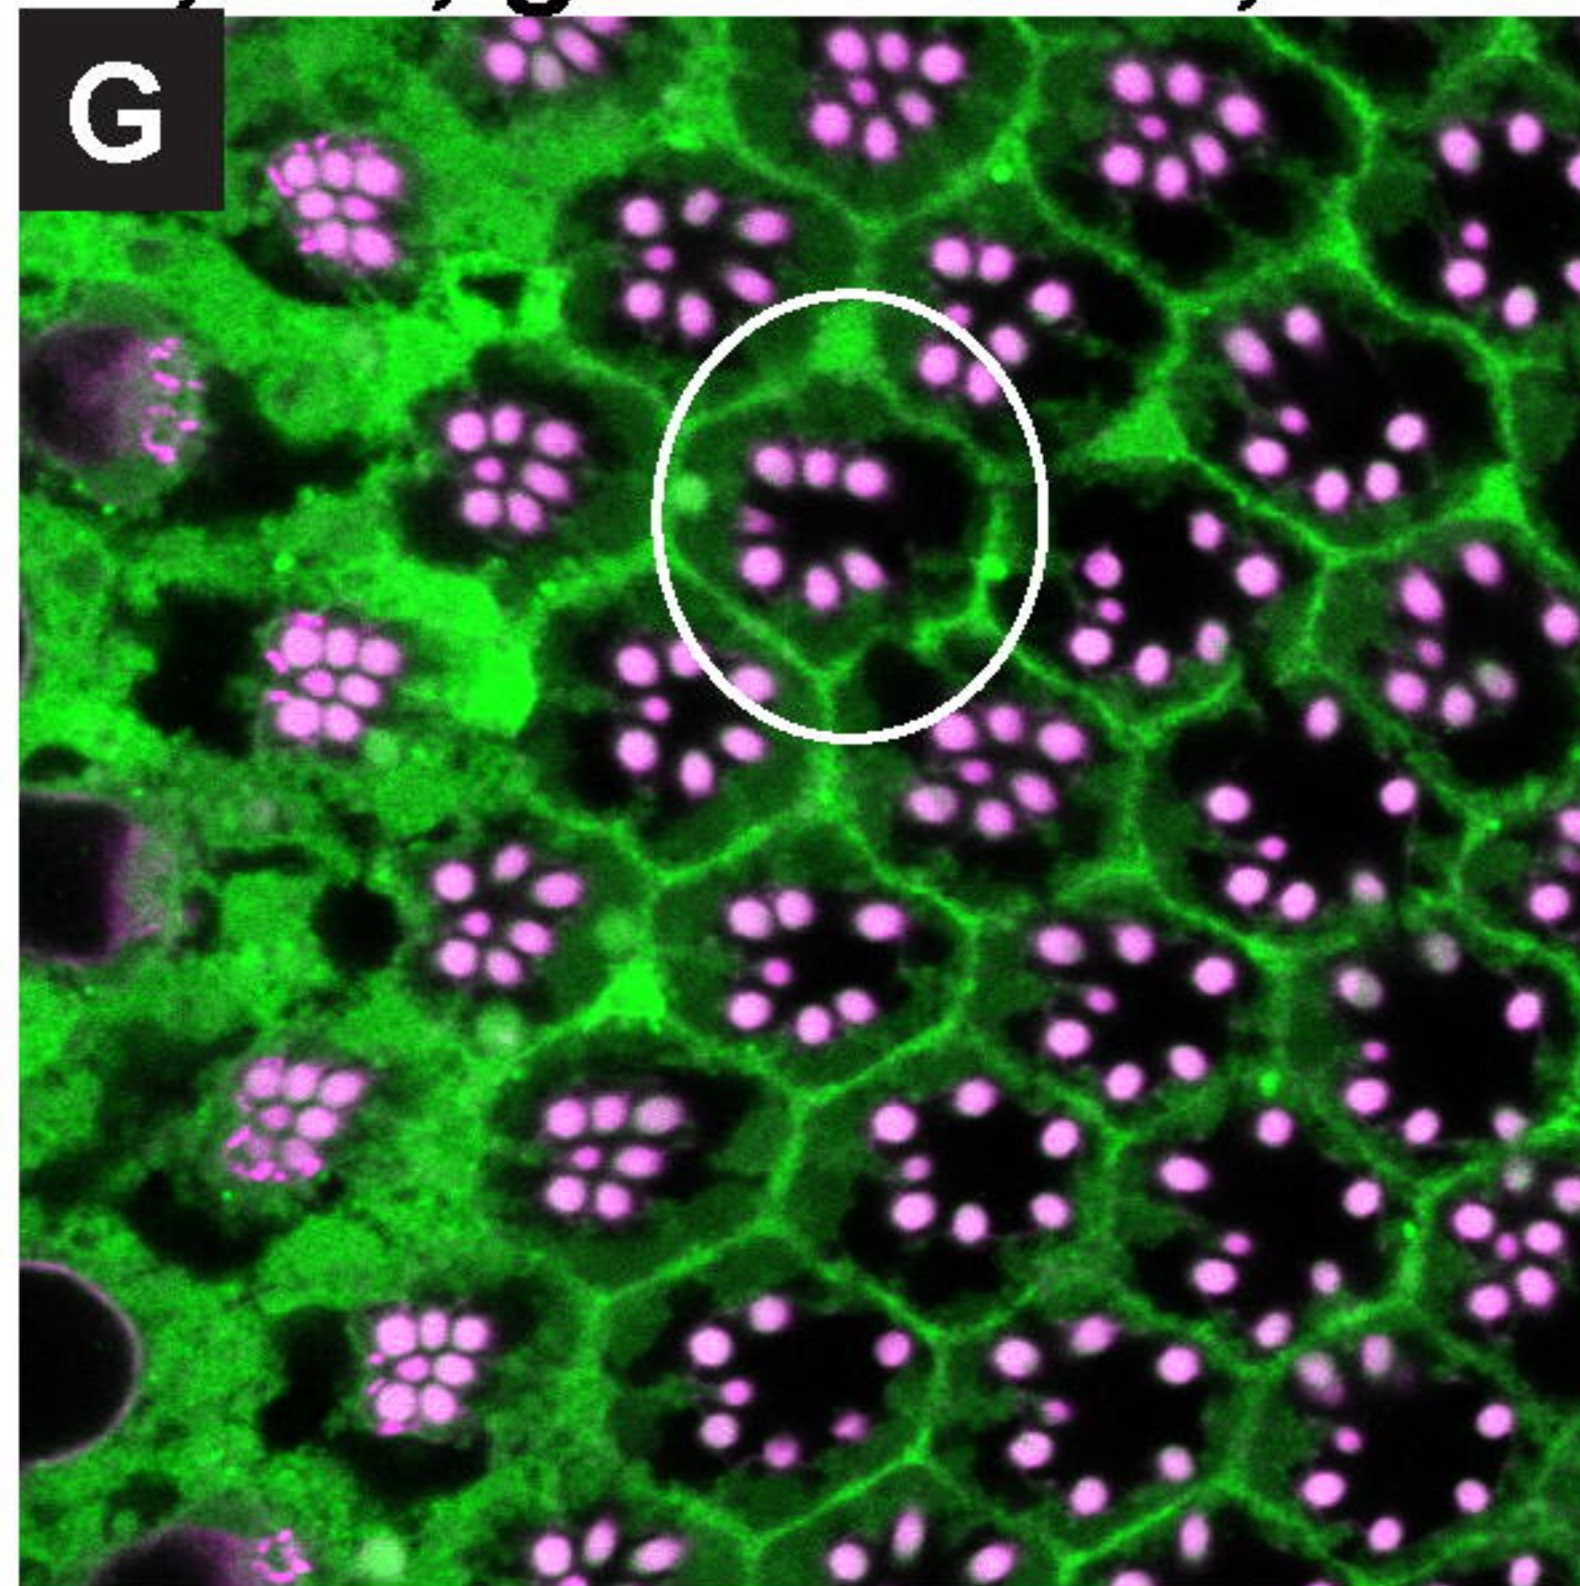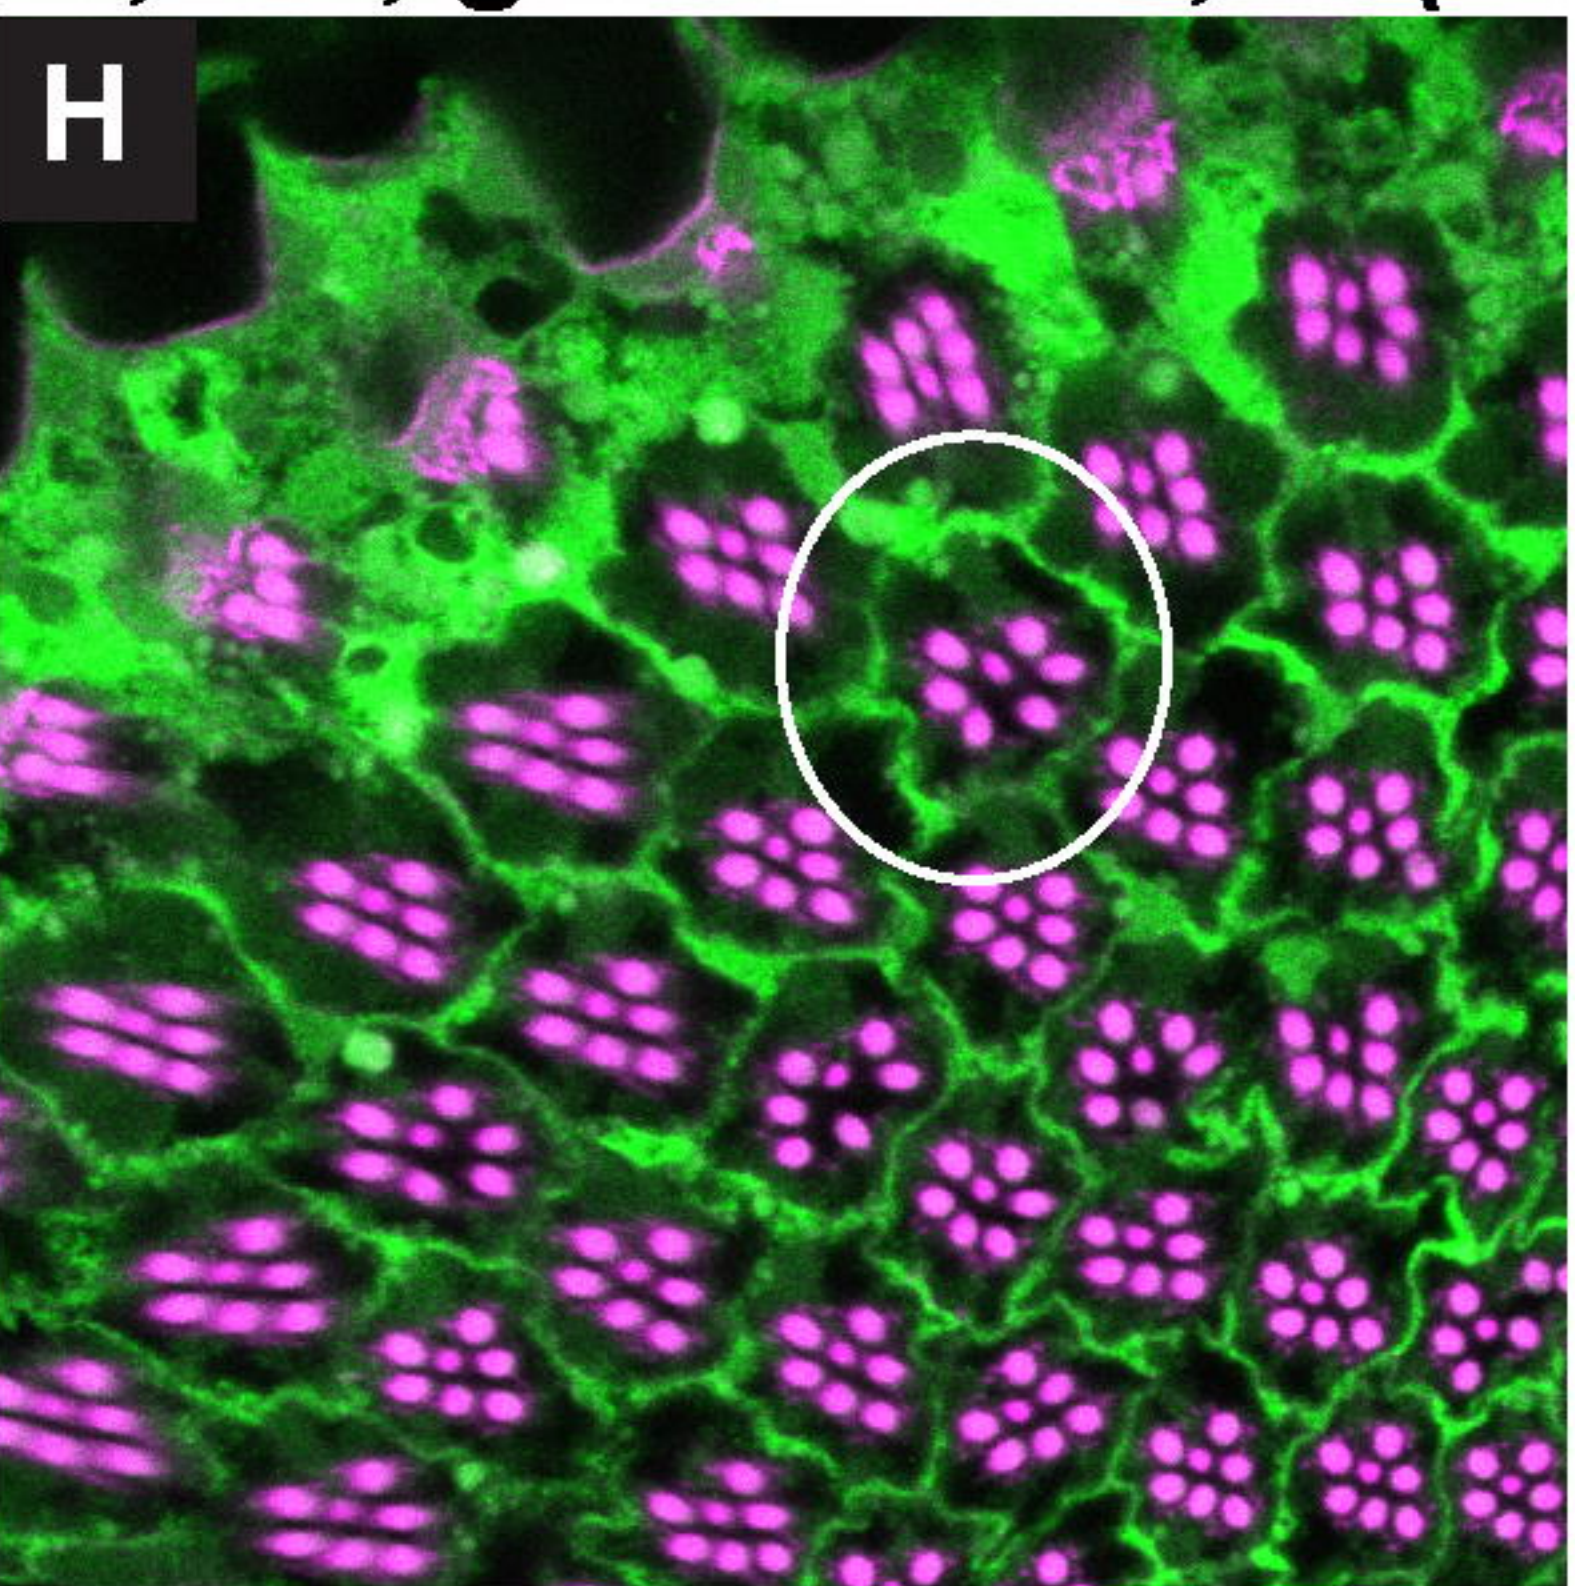

bioRxiv preprint doi: <https://doi.org/10.1101/386437>; this version posted August 13, 2018. The copyright holder for this preprint (which was not certified by peer review) is the author/funder, who has granted bioRxiv a license to display the preprint in perpetuity. It is made available under aCC-BY-NC-ND 4.0 International license.

*cn, bw*

*cn, bw;Df (3L) 217/+*

*DHE (ROS)*

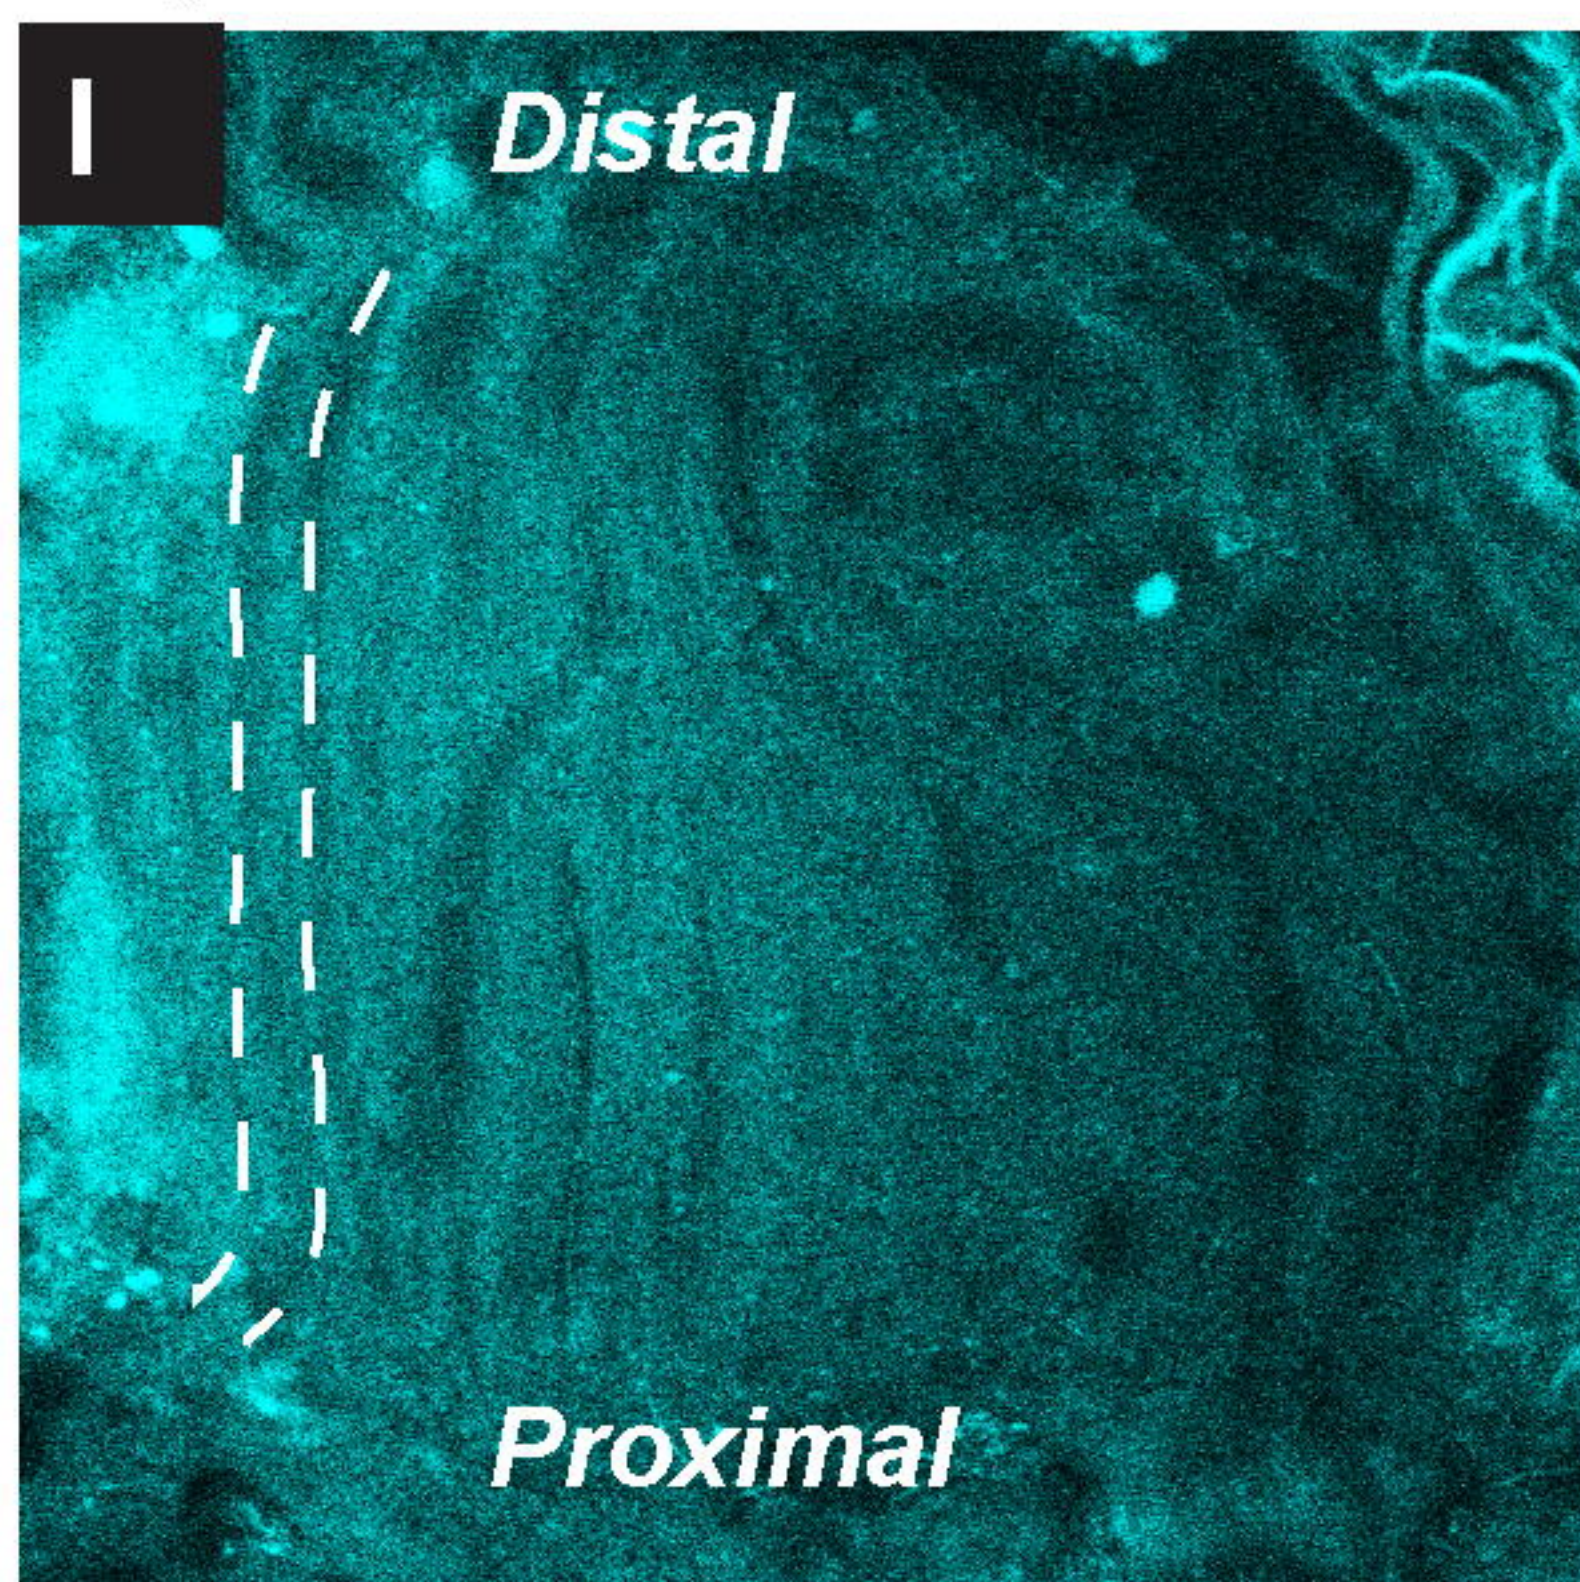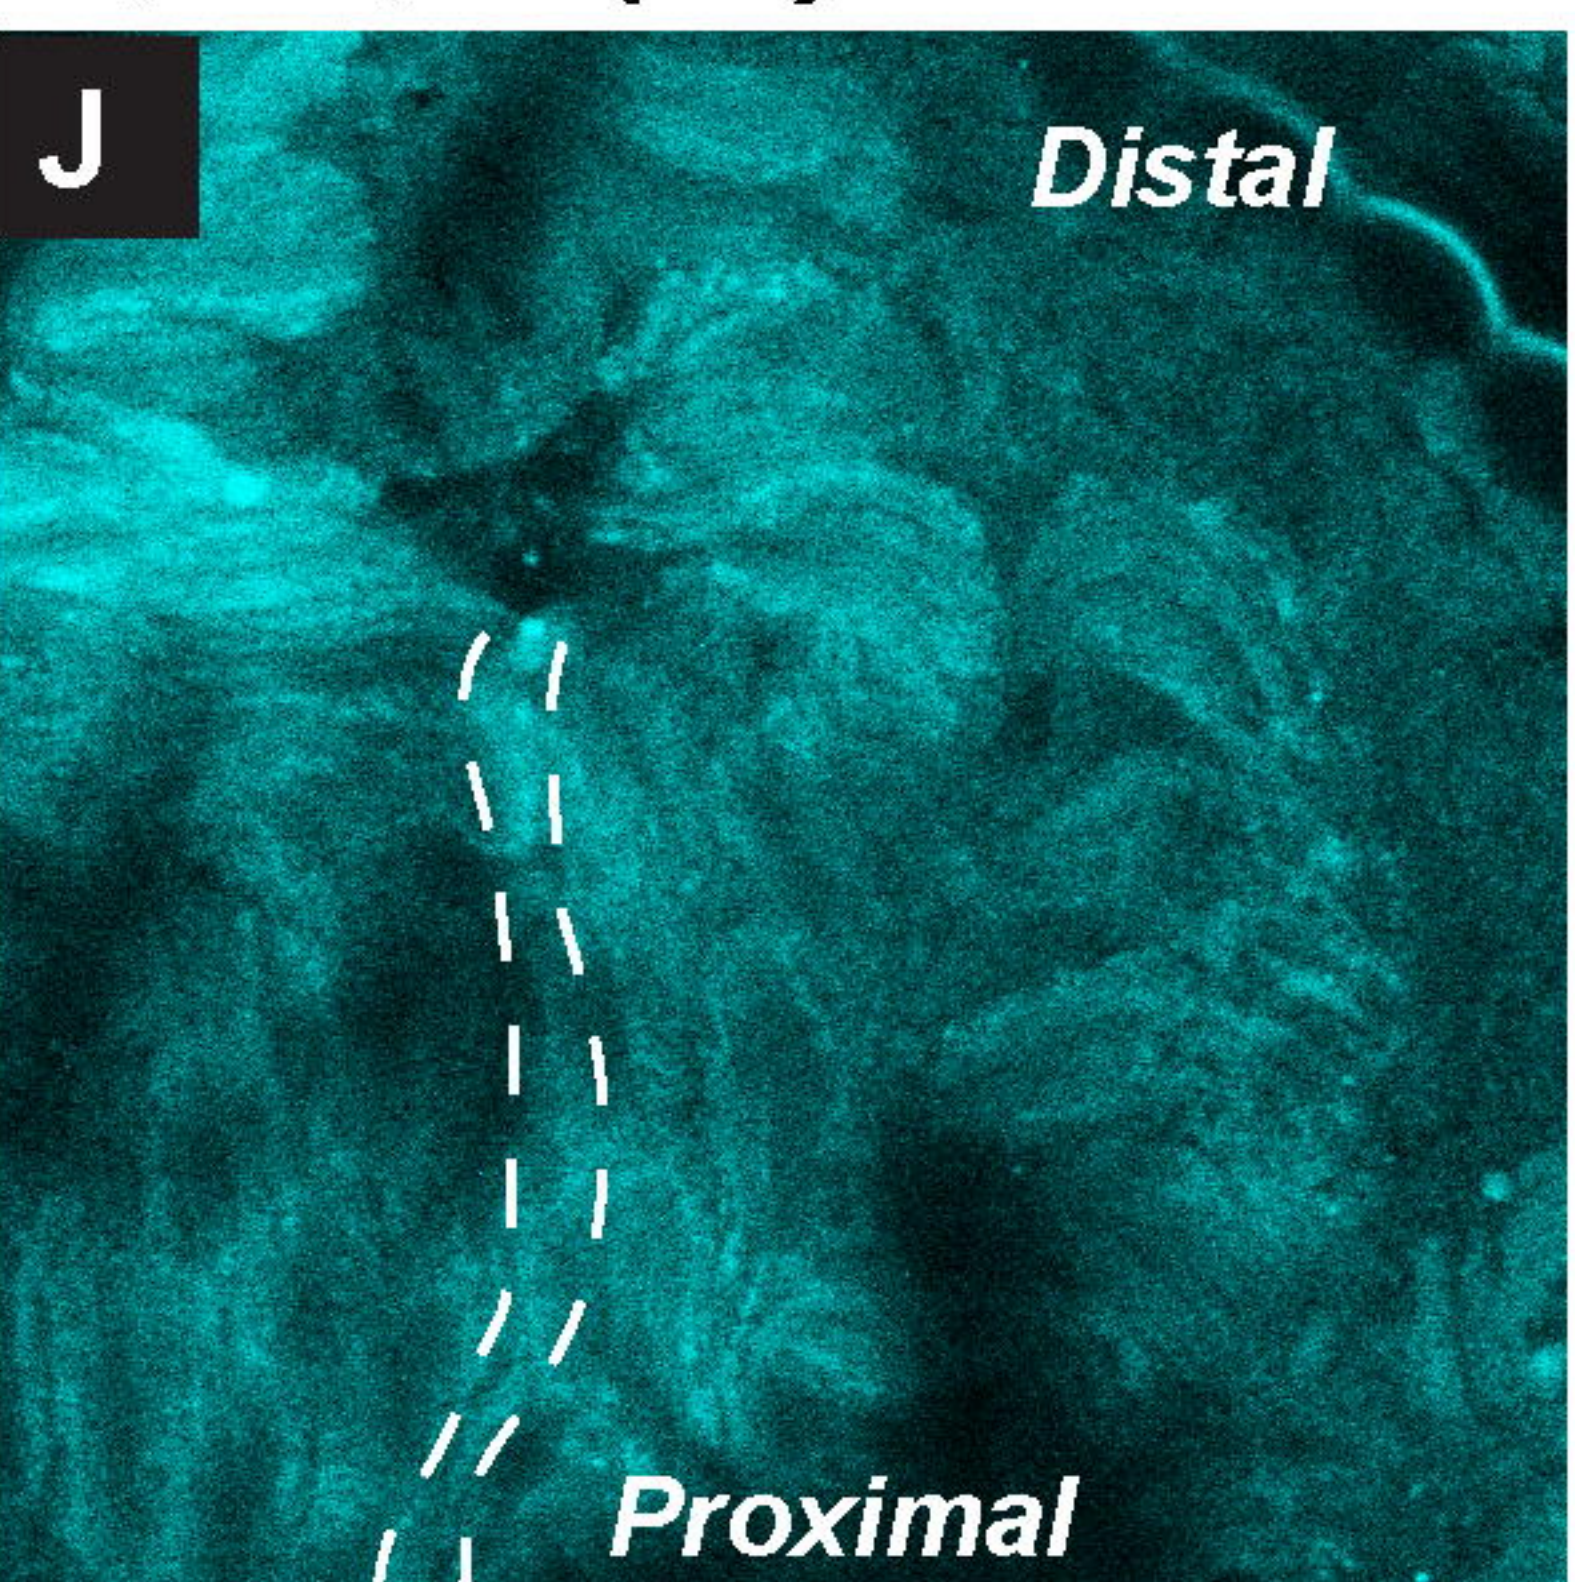

Figure 9
